# Supplementary material for: Ruthenium-catalyzed regio- and site-selective ortho C–H borylation of phenol derivatives
Source: Royal Society of Chemistry journal article supplement (doi:10.1039/d0cc02889d), 2020-01-01

## Electronic Supplementary Information

# Ruthenium-catalyzed regio- and site-selective *ortho* C–H borylation of phenol derivatives

Yuki Homma<sup>a</sup>, Kazuishi Fukuda<sup>a</sup>, Nobuharu Iwasawa<sup>a</sup> and Jun Takaya<sup>\*,a,b</sup>

<sup>a</sup>Department of Chemistry, Tokyo Institute of Technology, O-okayama, Meguro-ku, Tokyo 152-8551, Japan

<sup>b</sup>JST, PRESTO, Honcho, Kawaguchi, Saitama, 332-0012, Japan

### Table of Contents

|         |                                                                                                            |
|---------|------------------------------------------------------------------------------------------------------------|
| S2      | General                                                                                                    |
| S3-S7   | Preparation of phosphinites<br>Spectral data                                                               |
| S8-S16  | Procedure for C–H borylation of aryl phosphinites<br>Spectral data                                         |
| S17-S18 | Procedure for C–H borylation of aryl phosphites<br>Procedure for one-pot C–H borylation of aryl phosphites |
| S19     | Deuterium labeling experiments                                                                             |
| S20     | References                                                                                                 |
| S21–97  | NMR spectra                                                                                                |

**General:** All operations were performed under an argon atmosphere.  $^1\text{H}$ ,  $^{13}\text{C}$  and  $^{31}\text{P}$  spectra were recorded on an ECS-400 (400 MHz for  $^1\text{H}$ , 128 MHz for  $^{11}\text{B}$ , 100 MHz for  $^{13}\text{C}$ , and 160 MHz for  $^{31}\text{P}$ ), an ECX-400 (400 MHz for  $^1\text{H}$  and 160 MHz for  $^{31}\text{P}$ ), or an ECZ-500 (500 MHz for  $^1\text{H}$ , 125 MHz for  $^{13}\text{C}$ , and 200 MHz for  $^{31}\text{P}$ ) spectrometer in  $\text{CDCl}_3$ ,  $\text{C}_6\text{D}_6$ , acetone- $d_6$ , or dms- $d_6$ . Chemical shifts are expressed in parts per million (ppm) downfield from tetramethylsilane ( $\delta_{\text{H}}$  0.00,  $\delta_{\text{C}}$  0.00),  $\text{BF}_3\cdot\text{OEt}_2$  ( $\delta_{\text{B}}$  0.00), 85%  $\text{H}_3\text{PO}_4$  aq. ( $\delta_{\text{P}}$  0.00), or  $\text{C}_6\text{F}_6$  ( $\delta_{\text{F}}$  -163.00) and are referenced to residual solvents ( $\delta_{\text{H}}$  7.26 and  $\delta_{\text{C}}$  77.0 for chloroform,  $\delta_{\text{H}}$  7.16 and  $\delta_{\text{C}}$  128.06 for  $\text{C}_6\text{H}_6$ ,  $\delta_{\text{H}}$  7.05 and  $\delta_{\text{C}}$  206.26 for acetone- $d_6$ , and  $\delta_{\text{H}}$  2.50 for dms- $d_6$ ). IR spectra were recorded on an FT/IR-460 plus (JASCO Co., Ltd.) with an ATR PRO450-S accessory (JASCO Co., Ltd.). High resolution mass spectra (HRMS) were recorded on a BRUKER micrOTOF II and a JEOL JMS-T100 spectrometer. Silica Gel 60 (Kanto Chemical Co., Inc.) was used for flash column chromatography. A Merck Kieselgel 60 F<sub>254</sub> (0.25 mm thickness, coated on glass 20 x 20 cm<sup>2</sup>) plate was used for analytical thin layer chromatography (TLC). THF, Et<sub>2</sub>O, hexanes and toluene were purified by solvent purification system of Glass-Contour. *n*-Octane was purchased from Tokyo Chemical Industry and degassed by freeze-pump-thaw technique and dried over 4A molecular sieves. Benzene- $d_6$  was purchased from ACROS chemicals and dried and degassed by benzophenone ketyl. Chloroform- $d$  was purchased from Kanto Chemicals. Unless otherwise noted, materials were purchased from Sigma-Aldrich Corporation, FUJIFILM Wako Pure Chemical Corporation, Tokyo Chemical Industry Corporation, and Kanto Chemical Corporation.

## General procedure for the synthesis of aryl diphenylphosphinites

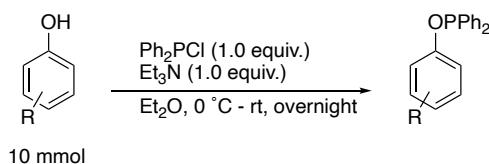

In a 100 mL two-neck flask, a phenol derivative (10.0 mmol) was dissolved in Et<sub>2</sub>O (30.0 mL) under an argon atmosphere. The flask was cooled to 0 °C in an ice-bath, and triethylamine (10.0 mmol) and chlorodiphenylphosphine (10.0 mmol) were successively added. The flask was allowed to stand at room temperature and stirred overnight. The solution was filtered through a short pad of alumina and Celite<sup>®</sup>, and the filtrate was concentrated under reduced pressure to give the product.

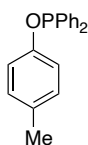

**1b** (colorless oil, 2.0 g, 7.0 mmol, 70%)

The spectral data were in good agreement with the literature values.<sup>1</sup>

<sup>1</sup>H NMR (CDCl<sub>3</sub>, 400 MHz)  $\delta$  = 7.61-7.56 (m, 4H), 7.42-7.32 (m, 6H), 7.10-6.98 (m, 4H), 2.28 (s, 3H).

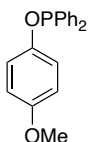

**1c** (white solid, 1.6 g, 5.2 mmol, 51%)

The spectral data were in good agreement with the literature values.<sup>2</sup>

<sup>1</sup>H NMR (CDCl<sub>3</sub>, 400 MHz)  $\delta$  = 7.61-7.55 (m, 4H), 7.43-7.34 (m, 6H), 7.05-6.90 (m, 2H), 6.82-6.76 (m, 2H), 3.75 (s, 3H).

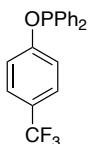

**1d** (colorless oil, 1.6 g, 4.5 mmol, 45%)

<sup>1</sup>H NMR (C<sub>6</sub>D<sub>6</sub>, 500 MHz)  $\delta$  = 7.58-7.52 (m, 4H), 7.20 (d,  $J$  = 8.0 Hz, 2H), 7.13-7.40 (m, 6H), 7.97 (d,  $J$  = 8.0 Hz, 2H); <sup>31</sup>P NMR (C<sub>6</sub>D<sub>6</sub>, 200 MHz)  $\delta$  = 113.3; <sup>19</sup>F NMR (C<sub>6</sub>D<sub>6</sub>, 465 MHz)  $\delta$  = -62.5; <sup>13</sup>C NMR (C<sub>6</sub>D<sub>6</sub>, 125 MHz)  $\delta$  = 160.2 (d,  $J$  = 10.7 Hz), 140.6 (d,  $J$  = 18.3 Hz), 131.0 (d,  $J$  = 22.8

Hz), 130.3, 128.9 (d,  $J = 7.5$  Hz), 127.2 (d,  $J = 3.8$  Hz), 125.0 (q,  $J = 272$  Hz), 124.7 (q,  $J = 32.5$  Hz), 119.1 (d,  $J = 11.3$  Hz); IR (ATR) 3053.6, 1610.3, 1510.1, 1434.8, 1322.0, 1228.4, 1106.0  $\text{cm}^{-1}$ ; HRMS (ESI): Calcd for  $\text{C}_{19}\text{H}_{15}\text{F}_3\text{OP}$   $[\text{M}+\text{H}]^+$ :347.0807; Found: 347.0790.

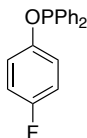

**1e** (colorless oil, 2.1 g, 7.1 mmol, 71%)

$^1\text{H}$  NMR ( $\text{C}_6\text{D}_6$ , 500 MHz)  $\delta = 7.62\text{-}7.54$  (m, 4H), 7.14-7.02 (m, 6H), 6.92-6.86 (m, 2H), 6.68-6.60 (m, 2H);  $^{31}\text{P}$  NMR ( $\text{C}_6\text{D}_6$ , 200 MHz)  $\delta = 114.4$ ;  $^{19}\text{F}$  NMR ( $\text{C}_6\text{D}_6$ , 465 MHz)  $\delta = -112.3$ ;  $^{13}\text{C}$  NMR ( $\text{C}_6\text{D}_6$ , 125 MHz)  $\delta = 158.8$  (d,  $J = 241.8$  Hz), 153.9 (d,  $J = 2.4$  Hz), 141.4 (d,  $J = 18.0$  Hz), 130.9 (d,  $J = 22.8$  Hz), 130.0, 128.8 (d,  $J = 7.1$  Hz), 120.4 (dd,  $J = 10.8, 8.4$  Hz), 116.2 (d,  $J = 22.8$  Hz); IR (ATR) 3053.7, 1497.5, 1433.8, 1194.7, 1090.6  $\text{cm}^{-1}$ ; HRMS (ESI): Calcd for  $\text{C}_{18}\text{H}_{15}\text{FOP}$   $[\text{M}+\text{H}]^+$ :297.0839; Found: 297.0831.

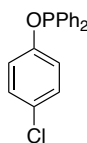

**1f** (white solid, 2.0 g, 6.5 mmol, 65%)

The spectral data were in good agreement with the literature values.<sup>3</sup>

$^1\text{H}$  NMR ( $\text{CDCl}_3$ , 400 MHz)  $\delta = 7.61\text{-}7.54$  (m, 4H), 7.44-7.37 (m, 6H), 7.23-7.19 (m, 2H), 7.08-7.03 (m, 2H).

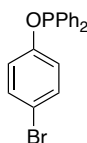

**1g** (white solid, 2.7 g, 5.5 mmol, 75%)

$^1\text{H}$  NMR ( $\text{C}_6\text{D}_6$ , 500 MHz)  $\delta = 7.58\text{-}7.51$  (m, 4H), 7.11-7.01 (m, 8H), 6.84-6.78 (m, 2H);  $^{31}\text{P}$  NMR ( $\text{C}_6\text{D}_6$ , 200 MHz)  $\delta = 113.6$ ;  $^{13}\text{C}$  NMR ( $\text{C}_6\text{D}_6$ , 125 MHz)  $\delta = 156.9$  (d,  $J = 9.6$  Hz), 141.1 (d,  $J = 18.0$  Hz), 132.8, 131.0 (d,  $J = 22.8$  Hz), 130.1, 128.8 (d,  $J = 7.1$  Hz), 121.0 (d,  $J = 10.8$  Hz), 115.4; IR (ATR) 3065.3, 1582.3, 1573.6, 1478.2, 1433.8, 1220.7, 1097.3  $\text{cm}^{-1}$ ; HRMS (ESI): Calcd for  $\text{C}_{18}\text{H}_{15}\text{BrOP}$   $[\text{M}+\text{H}]^+$ :357.0038; Found: 357.0040.

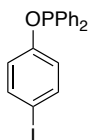

**1h** (white solid, 2.0 g, 4.9 mmol, 49%)

$^1\text{H}$  NMR ( $\text{C}_6\text{D}_6$ , 500 MHz)  $\delta$  = 7.55 (t,  $J$  = 7.5 Hz, 4H), 7.25 (d,  $J$  = 8.3 Hz, 2H), 7.14-7.01 (m, 6H), 6.72 (d,  $J$  = 8.3 Hz, 2H);  $^{31}\text{P}$  NMR ( $\text{C}_6\text{D}_6$ , 200 MHz)  $\delta$  = 113.1;  $^{13}\text{C}$  NMR ( $\text{C}_6\text{D}_6$ , 125 MHz)  $\delta$  = 157.6 (d,  $J$  = 10.8 Hz), 141.0 (d,  $J$  = 17.9 Hz), 138.8, 130.9 (d,  $J$  = 22.8 Hz), 130.1, 128.8 (d,  $J$  = 7.1 Hz), 121.4 (d,  $J$  = 10.8 Hz), 85.7; IR (ATR) 3073.9, 1577.5, 1475.3, 1211.1, 1164.8, 1092.5  $\text{cm}^{-1}$ ; HRMS (ESI): Calcd for  $\text{C}_{18}\text{H}_{15}\text{IOP}$   $[\text{M}+\text{H}]^+$ : 404.9900; Found: 404.9886.

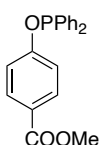

**1i** (white solid, 1.1 g, 3.3 mmol, 34%)

$^1\text{H}$  NMR ( $\text{C}_6\text{D}_6$ , 500 MHz)  $\delta$  = 8.03 (d,  $J$  = 8.5, 2H), 7.55 (t,  $J$  = 7.5 Hz, 4H), 7.20-7.02 (m, 8H), 3.45 (s, 3H);  $^{31}\text{P}$  NMR ( $\text{C}_6\text{D}_6$ , 200 MHz)  $\delta$  = 112.5;  $^{13}\text{C}$  NMR ( $\text{C}_6\text{D}_6$ , 125 MHz)  $\delta$  = 165.9, 161.1 (d,  $J$  = 10.9 Hz), 140.4 (d,  $J$  = 16.9 Hz), 131.7, 130.7 (d,  $J$  = 22.8 Hz), 129.9, 128.5 (d,  $J$  = 6.0 Hz), 124.9, 118.5 (d,  $J$  = 12.0 Hz), 51.2; IR (ATR) 1718.3, 1598.7, 1503.2, 1431.9, 1309.4, 1271.8, 1235.2, 1167.7, 1101.2, 1009.6  $\text{cm}^{-1}$ ; HRMS (ESI): Calcd for  $\text{C}_{20}\text{H}_{18}\text{O}_3\text{P}$   $[\text{M}+\text{H}]^+$ : 337.0988; Found: 337.0985.

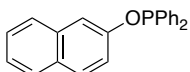

**1j** (white solid, 2.3 g, 7.0 mmol, 70%)

The spectral data were in good agreement with the literature values.<sup>4</sup>

$^1\text{H}$  NMR ( $\text{CDCl}_3$ , 400 MHz)  $\delta$  = 7.79-7.74 (m, 2H), 7.70 (d,  $J$  = 10.0 Hz, 1H), 7.64 (td,  $J$  = 10.0, 3.0 Hz, 4H), 7.51 (t,  $J$  = 3.0 Hz 1H), 7.45-7.38 (m, 7H), 7.38-7.32 (m, 2H).

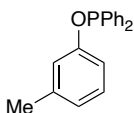

**1k** (white solid, 1.2 g, 4.1 mmol, 41%)

$^1\text{H}$  NMR ( $\text{C}_6\text{D}_6$ , 500 MHz)  $\delta$  = 7.68-7.62 (m, 4H), 7.12-7.02 (m, 7H), 6.99 (t,  $J$  = 7.8 Hz, 1H), 6.67 (d,  $J$  = 7.8 Hz, 2H), 2.00 (s, 3H);  $^{31}\text{P}$  NMR ( $\text{C}_6\text{D}_6$ , 200 MHz)  $\delta$  = 110.9;  $^{13}\text{C}$  NMR ( $\text{C}_6\text{D}_6$ , 125 MHz)  $\delta$  = 158.0 (d,  $J$  = 9.5 Hz), 141.8 (d,  $J$  = 17.9 Hz), 139.9, 130.9 (d,  $J$  = 22.8 Hz), 129.9, 129.7, 128.8

(d,  $J = 7.1$  Hz), 123.8, 120.1 (d,  $J = 10.8$  Hz), 116.3 (d,  $J = 12.0$  Hz), 21.3; IR (ATR) 3052.8, 1603.5, 1582.3, 1484.0, 1433.8, 1250.6, 1145.5, 1094.4  $\text{cm}^{-1}$ ; HRMS (ESI): Calcd for  $\text{C}_{19}\text{H}_{18}\text{OP}$   $[\text{M}+\text{H}]^+$ : 293.1090; Found: 293.1088.

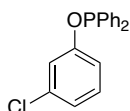

**1l** (colorless oil, 1.9 g, 6.2 mmol, 62%)

$^1\text{H}$  NMR ( $\text{C}_6\text{D}_6$ , 500 MHz)  $\delta = 7.56\text{-}7.51$  (m, 4H), 7.30 (dd,  $J = 4.0, 2.3$  Hz 1H), 7.10-7.00 (m, 6H), 6.93 (br d,  $J = 8.0$  Hz, 1H), 6.79 (dd,  $J = 8.0, 2.3$  Hz, 1H), 6.68 (t,  $J = 8.0$  Hz, 1H);  $^{31}\text{P}$  NMR ( $\text{C}_6\text{D}_6$ , 200 MHz)  $\delta = 113.6$ ;  $^{13}\text{C}$  NMR ( $\text{C}_6\text{D}_6$ , 125 MHz)  $\delta = 158.5$  (d,  $J = 10.8$  Hz), 140.8 (d,  $J = 18.0$  Hz), 135.2, 130.9 (d,  $J = 22.8$  Hz), 130.7, 130.1, 128.8 (d,  $J = 7.3$  Hz), 123.0, 119.8 (d,  $J = 10.8$  Hz), 117.3 (d,  $J = 11.9$  Hz); IR (ATR) 3055.7, 1586.2, 1472.4, 1433.8, 1215.9, 1088.6  $\text{cm}^{-1}$ ; HRMS (ESI): Calcd for  $\text{C}_{18}\text{H}_{15}\text{ClOP}$   $[\text{M}+\text{H}]^+$ : 313.0544; Found: 313.0534.

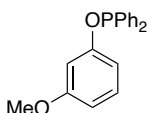

**1m** (colorless oil, 1.9 g, 6.3 mmol, 63%)

$^1\text{H}$  NMR ( $\text{C}_6\text{D}_6$ , 500 MHz)  $\delta = 7.67\text{-}7.61$  (m, 4H), 7.11-7.01 (m, 6H), 6.98-6.89 (m, 3H), 6.51 (dd,  $J = 8.5, 2.0$  Hz, 1H), 3.20 (s, 3H);  $^{31}\text{P}$  NMR ( $\text{C}_6\text{D}_6$ , 200 MHz)  $\delta = 111.3$ ;  $^{13}\text{C}$  NMR ( $\text{C}_6\text{D}_6$ , 125 MHz)  $\delta = 161.5, 159.4$  (d,  $J = 10.8$  Hz), 141.5 (d,  $J = 21.6$  Hz), 131.0 (d,  $J = 22.8$  Hz), 130.4, 129.9, 128.8 (d,  $J = 7.3$  Hz), 111.3 (d,  $J = 12.0$  Hz), 109.0, 105.4 (d,  $J = 10.8$  Hz), 54.8; IR (ATR) 3071.1, 3053.7, 3002.6, 2957.3, 2938.0, 2832.9, 1598.7, 1588.1, 1487.8, 1433.8, 1261.2, 1191.8, 1138.8  $\text{cm}^{-1}$ ; HRMS (ESI): Calcd for  $\text{C}_{19}\text{H}_{18}\text{O}_2\text{P}$   $[\text{M}+\text{H}]^+$ : 309.1039; Found: 309.1034.

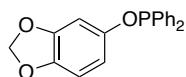

**1n** (white solid, 2.3 g, 7.0 mmol, 70%)

$^1\text{H}$  NMR ( $\text{C}_6\text{D}_6$ , 500 MHz)  $\delta = 7.64\text{-}7.56$  (m, 4H), 7.12-7.01 (m, 6H), 6.81 (s, 1H), 6.59 (dt,  $J = 8.5, 2.5$  Hz, 1H), 6.46 (d,  $J = 8.5$  Hz, 1H), 5.22 (s, 2H);  $^{31}\text{P}$  NMR ( $\text{C}_6\text{D}_6$ , 200 MHz)  $\delta = 114.4$ ;  $^{13}\text{C}$  NMR ( $\text{C}_6\text{D}_6$ , 125 MHz)  $\delta = 153.0$  (d,  $J = 9.6$  Hz), 148.8, 143.6, 141.7 (d,  $J = 18.0$  Hz), 131.0 (d,  $J = 21.6$  Hz), 129.9, 128.7 (d,  $J = 6.0$  Hz), 111.4 (d,  $J = 12.0$  Hz), 108.3, 102.1 (d,  $J = 9.5$  Hz), 101.3; IR (ATR) 2909.1, 1624.7, 1500.4, 1483.0, 1240.0, 1183.1, 1122.4, 1094.4  $\text{cm}^{-1}$ ; HRMS (ESI): Calcd for  $\text{C}_{19}\text{H}_{16}\text{O}_3\text{P}$   $[\text{M}+\text{H}]^+$ : 323.0832; Found: 323.0819.

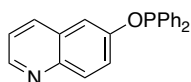

**1o** (beige solid, 1.2 g, 3.8 mmol, 38%)

**1o** was synthesized according to the slightly modified procedure as follows.

In a 100 mL two-neck flask, 6-hydroxyquinoline (1.45 g, 10.0 mmol) was dissolved in THF (30.0 mL) under an argon atmosphere. The flask was cooled to 0 °C in an ice-bath, and triethylamine (2.77 mL, 20.0 mmol) and chlorodiphenylphosphine (1.84 mL, 10.0 mmol) were successively added. The flask was allowed to stand at room temperature and stirred for 2 h. The solution was filtered through a short pad of Celite<sup>®</sup>. After the filtrate was concentrated under reduced pressure, the resulting solid was precipitated from hexane/ dichloromethane to give **1o**.

<sup>1</sup>H NMR (CDCl<sub>3</sub>, 500 MHz)  $\delta$  = 8.79 (dd,  $J$  = 4.0, 1.5 Hz, 1H), 8.04-8.00 (m, 2H), 7.68-7.60 (m, 4H), 7.57 (dd,  $J$  = 9.0, 2.5 Hz 1H), 7.47 (t,  $J$  = 2.5 Hz, 1H) 7.45-7.38(m, 6H), 7.32 (dd,  $J$  = 8.5, 4.0 Hz 1H); <sup>31</sup>P NMR (CDCl<sub>3</sub> 200 MHz)  $\delta$  = 112.4; <sup>13</sup>C NMR (CDCl<sub>3</sub> 125 MHz)  $\delta$  = 155.4 (d,  $J$  = 9.5 Hz), 148.9, 145.0, 140.4 (d,  $J$  = 16.8 Hz), 135.3, 131.1, 130.7 (d,  $J$  = 22.8 Hz), 130.1, 129.2, 128.7 (d,  $J$  = 7.3 Hz), 124.2 (d,  $J$  = 7.1 Hz), 121.5, 113.1 (d,  $J$  = 13.0 Hz); IR (ATR) 3067.2, 2351.8, 2320.0, 1619.9, 1592.9, 1497.5, 1376.0, 1319.1, 1220.7, 1160.0 cm<sup>-1</sup>; HRMS (ESI+) Calcd for C<sub>21</sub>H<sub>17</sub>NOP [M+H]<sup>+</sup>: 330.1048; Found: 330.1057.

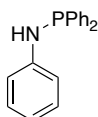

**4** (white solid, 1.3 g, 4.7 mmol, 47%)

The spectral data were in good agreement with the literature values<sup>5</sup>

<sup>1</sup>H NMR (C<sub>6</sub>D<sub>6</sub>, 500 MHz)  $\delta$  = 7.48-7.42 (m, 4H), 7.40-7.33 (m, 6H), 7.19 (t,  $J$  = 7.9 Hz, 2H), 7.04-6.98 (m, 2H), 6.81 (t,  $J$  = 7.9 Hz, 1H), 4.37 (d,  $J$  = 7.4 Hz, 1H).

## General procedure for C–H borylation of aryl diphenylphosphinites

### Procedure A

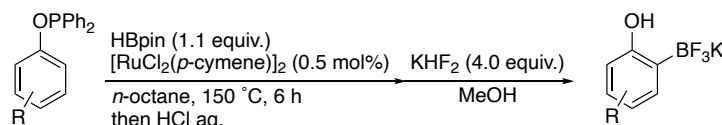

A solution of [RuCl<sub>2</sub>(*p*-cymene)]<sub>2</sub> (0.9 mg, 1.5 μmol) and aryl diphenylphosphinite **1** (0.30 mmol) in *n*-octane (1.5 mL) was placed in a glass tube (inside diameter = 1.7 cm, length = 18 cm) equipped with a three-way stop cock under Ar. HBpin (47.4 μL, 0.33 mmol) was added to the solution at room temperature, and the glass tube was closed. Then the mixture was stirred at 150 °C in the closed system for 6 h. 1N HCl aq. was added to the solution at room temperature, and the mixture was stirred for 24 h. The mixture was extracted with AcOEt three times, and the combined organic layers were washed with brine and dried over MgSO<sub>4</sub>. After filtration to remove the drying agent, the filtrate was evaporated to give a crude product. To a MeOH solution (1.5 mL) of the crude product was added KHF<sub>2</sub> (93.7 mg, 1.2 mmol) at room temperature, and the mixture was stirred for 24 h. The suspension was evaporated at 40 °C for 20 min, and residual white solids were dissolved in acetone (5.0 mL). After insoluble salts were filtered off, the filtrate was concentrated to ca. 1 mL volume. Then, toluene (ca. 1 mL) was added, and the remaining acetone was removed under reduced pressure to give the suspension in toluene. The resulting beige solids were collected by filtration and rinsed with excess *n*-hexane and a small amount of cold MeOH (ca. 0 °C) to give aryl trifluoroborate **2**.

### Procedure B

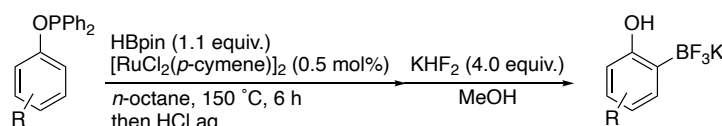

A solution of [RuCl<sub>2</sub>(*p*-cymene)]<sub>2</sub> (0.9 mg, 1.5 μmol) and aryl diphenylphosphinite **1** (0.30 mmol) in *n*-octane (1.5 mL) was placed in a glass tube (inside diameter = 1.7 cm, length = 18 cm) equipped with a three-way stop cock under Ar. HBpin (47.4 μL, 0.33 mmol) was added to the solution at room temperature, and the glass tube was closed. Then the mixture was stirred at 150 °C in the closed system for 6 h. 1N HCl aq. was added to the solution at room temperature, and the mixture was stirred for 24 h. The mixture was extracted with AcOEt three times, and the combined organic layers were washed with brine and dried over MgSO<sub>4</sub>. After filtration to remove the drying agent, the filtrate was evaporated to give a crude product. To a MeOH solution (1.5 mL) of the crude product was added KHF<sub>2</sub> (93.7 mg, 1.2 mmol) at room temperature, and the mixture was stirred for 24 h. After the suspension was evaporated at 40 °C for 20 min, the resulting beige solid



was collected by filtration and rinsed with a small amount of cold MeOH (ca. 0°C) to give aryl trifluoroborate **2**.

This reaction should be conducted inside an explosion proof wall. This reaction is performed in a sealed glass tube at 150 °C which is over the boiling point of *n*-octane. Furthermore, H<sub>2</sub> is generated during the reaction. The volume of the dead space inside the glass ware is ca. 34.5 cm<sup>3</sup>.

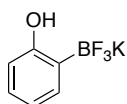

Synthesized according to the procedure A.

**2a** (white solid, 46 mg, 0.23 mmol, 77%)

The spectral data were in good agreement with the literature values.<sup>6</sup>

<sup>1</sup>H NMR (acetone-*d*<sub>6</sub>, 500 MHz)  $\delta$  = 7.41 (q, *J* = 10.5 Hz, 1H), 7.27 (br d, *J* = 7.0 Hz, 1H), 6.93-6.88 (m, 1H), 6.63-6.57 (m, 1H), 6.52 (d, *J* = 8.5 Hz, 1H).

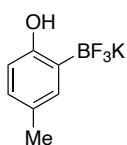

Synthesized according to the procedure A.

**2b** (white solid, 49 mg, 0.23 mmol, 76%)

The spectral data were in good agreement with the literature values.<sup>6</sup>

<sup>1</sup>H NMR (acetone-*d*<sub>6</sub>, 500 MHz)  $\delta$  = 7.23 (q, *J* = 10.5 Hz, 1H), 7.08 (br s, 1H), 6.71 (dd, *J* = 8.0, 2.5 Hz, 1H), 6.41 (d, *J* = 8.0 Hz, 1H), 2.13 (s, 3H).

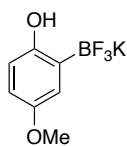

Synthesized according to the procedure B.

**2c** (white solid, 68 mg, 0.29 mmol, 96%)

The spectral data were in good agreement with the literature values.<sup>7</sup>

<sup>1</sup>H NMR (acetone-*d*<sub>6</sub>, 500 MHz)  $\delta$  = 7.07 (q, *J* = 11.0 Hz, 1H), 6.84 (br s, 1H), 6.45 (dd, *J* = 8.5, 3.5 Hz, 1H), 6.40 (d, *J* = 8.5 Hz, 1H), 3.61 (s, 3H).

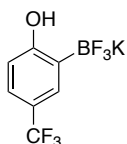

Synthesized according to the procedure A.

**2d** (white solid, 46 mg, 0.17 mmol, 57%)

$^1\text{H}$  NMR (acetone- $d_6$ , 500 MHz)  $\delta$  = 8.02 (q,  $J$  = 11.5 Hz, 1H), 7.59 (br s, 1H), 7.24 (dd,  $J$  = 8.5, 2.0 Hz, 1H), 6.66 (d,  $J$  = 8.5 Hz, 1H);  $^{13}\text{C}$  NMR (acetone- $d_6$ , 125 MHz)  $\delta$  = 164.2, 131.2, 126.8 (q,  $J$  = 271.6 Hz), 124.9 (d,  $J$  = 3.6 Hz), 120.6 (q,  $J$  = 31.1 Hz), 114.3, 1C(C-B) is missing.;  $^{19}\text{F}$  NMR (acetone- $d_6$ , 465 MHz),  $\delta$  = -62.3 (s), -139.2 (m);  $^{11}\text{B}$  NMR (acetone- $d_6$ , 158 MHz)  $\delta$  = 3.06 (q,  $J$  = 52.8 Hz); IR (ATR) 1329.7, 1239.0, 1181.2, 1113.7, 1079.0  $\text{cm}^{-1}$ ; HRMS (ESI): Calcd for  $\text{C}_7\text{H}_4\text{BF}_6\text{O}$  [M-K] $^-$ : 229.0265; Found: 229.0255.

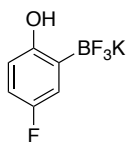

Synthesized according to the procedure A.

**2e** (white solid, 52 mg, 0.24 mmol, 80%)

$^1\text{H}$  NMR (acetone- $d_6$ , 500 MHz)  $\delta$  = 7.28 (q,  $J$  = 10.5 Hz 1H), 6.93 (br d,  $J$  = 7.5 Hz, 1H), 6.62 (td,  $J$  = 8.5, 3.5 Hz, 1H), 6.49 (dd,  $J$  = 8.5, 4.0 Hz 1H);  $^{13}\text{C}$  NMR (acetone- $d_6$ , 125 MHz)  $\delta$  = 157.4 (d,  $J$  = 234.6 Hz), 156.9, 119.1 (d,  $J$  = 19.1 Hz), 114.6, 113.2 (d,  $J$  = 24.0 Hz), 1C(C-B) is missing.;  $^{19}\text{F}$  NMR (acetone- $d_6$ , 465 MHz),  $\delta$  = -131.0 (s), -139.7 (m);  $^{11}\text{B}$  NMR (acetone- $d_6$ , 158 MHz)  $\delta$  = 2.99 (q,  $J$  = 54.2 Hz); IR (ATR) 3565.7, 1487.8, 1417.4, 1265.1, 1187.0, 1144.6  $\text{cm}^{-1}$ ; HRMS (ESI): Calcd for  $\text{C}_6\text{H}_4\text{BF}_4\text{O}$  [M-K] $^-$ : 179.0297; Found: 179.0294.

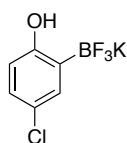

Synthesized according to the procedure A.

**2f** (white solid, 69 mg, 0.29 mmol, 98%)

The spectral data were in good agreement with literature values.<sup>6</sup>

$^1\text{H}$  NMR (acetone- $d_6$ , 500 MHz)  $\delta$  = 7.54 (q,  $J$  = 11.0 Hz, 1H), 7.19 (br s, 1H), 6.85 (dd,  $J$  = 8.8, 3.0 Hz, 1H), 6.48 (d,  $J$  = 8.8 Hz 1H).

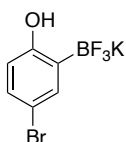

Synthesized according to the procedure A.

**2g** (white solid, 74 mg, 0.26 mmol, 88%)

$^1\text{H}$  NMR (acetone- $d_6$ , 500 MHz)  $\delta$  = 7.55 (q,  $J$  = 11.0 Hz 1H), 7.36 (br s, 1H), 7.02 (dd,  $J$  = 8.5, 3.0 Hz, 1H), 6.47 (d,  $J$  = 8.5 Hz 1H);  $^{13}\text{C}$  NMR (acetone- $d_6$ , 125 MHz)  $\delta$  = 160.4, 136.6, 130.1, 116.5, 111.6, 1C(C-B) is missing.;  $^{19}\text{F}$  NMR (acetone- $d_6$ , 465 MHz),  $\delta$  = -139.3 (m);  $^{11}\text{B}$  NMR (acetone- $d_6$ , 158 MHz)  $\delta$  = 2.85 (q,  $J$  = 52.8 Hz); IR (ATR) 3523.3, 1600.6, 1482.0, 1390.4, 1241.0, 1121.4  $\text{cm}^{-1}$ ; HRMS (ESI): Calcd for  $\text{C}_6\text{H}_4\text{BBrF}_3\text{O} [\text{M-K}]^-$ : 238.9496; Found: 238.9502.

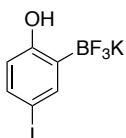

Synthesized according to the procedure B.

**2h** (white solid, 95 mg, 0.29 mmol, 97%)

$^1\text{H}$  NMR (acetone- $d_6$ , 500 MHz)  $\delta$  = 7.60-7.51 (m, 2H), 7.21 (dd,  $J$  = 8.5, 2.5 Hz, 1H), 6.39 (d,  $J$  = 8.5 Hz, 1H);  $^{13}\text{C}$  NMR (acetone- $d_6$ , 125 MHz)  $\delta$  = 160.1, 142.8, 136.2, 117.3, 82.1, 1C(C-B) is missing.;  $^{19}\text{F}$  NMR (acetone- $d_6$ , 465 MHz),  $\delta$  = -137.9 (m);  $^{11}\text{B}$  NMR (acetone- $d_6$ , 158 MHz)  $\delta$  = 2.71 (q,  $J$  = 54.2 Hz); IR (ATR) 3505.0, 1595.8, 1478.2, 1381.8, 1245.8, 1177.3, 1120.4  $\text{cm}^{-1}$ ; HRMS (ESI): Calcd for  $\text{C}_6\text{H}_4\text{BF}_3\text{IO} [\text{M-K}]^-$ : 286.9358; Found: 286.9361.

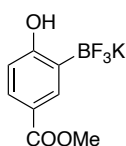

Synthesized according to the procedure B.

**2i** (white solid, 58 mg, 0.22 mmol, 75%)

$^1\text{H}$  NMR (acetone- $d_6$ , 500 MHz)  $\delta$  = 8.12-8.02 (m, 2H), 7.65 (dd,  $J$  = 8.5, 2.5 Hz, 1H), 6.59 (d,  $J$  = 8.5 Hz 1H), 3.76 (s, 3H);  $^{13}\text{C}$  NMR (acetone- $d_6$ , 125 MHz)  $\delta$  = 168.2, 165.8, 136.7, 130.1, 121.1, 114.2, 51.4, 1C(C-B) is missing.;  $^{19}\text{F}$  NMR (acetone- $d_6$ , 465 MHz),  $\delta$  = -138.7 (m);  $^{11}\text{B}$  NMR (acetone- $d_6$ , 158 MHz)  $\delta$  = 3.22 (q,  $J$  = 52.8 Hz); IR (ATR) 3512.7, 1700.0, 1613.2, 1438.6, 1313.3, 1229.4, 1163.8  $\text{cm}^{-1}$ ; HRMS (ESI): Calcd for  $\text{C}_8\text{H}_7\text{BF}_3\text{O}_3 [\text{M-K}]^-$ : 219.0446; Found: 219.0445.

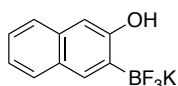

Synthesized according to the procedure B.

**2j** (white solid, 65 mg, 0.26 mmol, 86%)

The spectral data were in good agreement with literature values.<sup>8</sup>

<sup>1</sup>H NMR (dms-*d*<sub>6</sub>, 500 MHz)  $\delta$  = 7.68-7.52 (m, 4H), 7.24 (t,  $J$  = 7.5 Hz, 1H), 7.14 (d,  $J$  = 7.5 Hz, 1H), 6.88 (s, 1H)

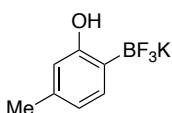

Synthesized according to the procedure A.

**2k** (white solid, 55 mg, 0.26 mmol, 85%)

The spectral data were in good agreement with literature values.<sup>6</sup>

<sup>1</sup>H NMR (acetone-*d*<sub>6</sub>, 500 MHz)  $\delta$  = 7.40 (q,  $J$  = 10.5 Hz, 1H), 7.14 (d,  $J$  = 6.5 Hz, 1H), 6.43 (d,  $J$  = 6.5 Hz, 1H), 6.35 (s, 1H), 2.15 (s, 3H).

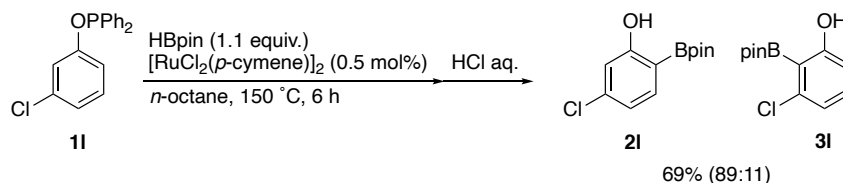

**Borylation of 11:** A solution of  $[\text{RuCl}_2(p\text{-cymene})]_2$  (0.9 mg, 1.5  $\mu\text{mol}$ ) and **11** (93.8 mg, 0.30 mmol) in *n*-octane (1.5 mL) was placed in a glass tube (inside diameter = 1.7 cm, length = 18 cm) equipped with a three-way stop cock under Ar. HBpin (47.4  $\mu\text{L}$ , 0.33 mmol) was added to the solution at room temperature, and the glass tube was closed. Then the mixture was stirred at 150  $^\circ\text{C}$  in the closed system for 6 h. 1N HCl aq. was added to the solution at room temperature, and the mixture was stirred for 24 h. The mixture was extracted with AcOEt three times, and the combined organic layers were washed with brine and dried over  $\text{MgSO}_4$ . After filtration to remove the drying agent, the filtrate was evaporated to give a crude product. The crude mixture was passed through a short pad of silica gel using  $\text{CH}_2\text{Cl}_2$  as an eluent to afford a mixture of the borylation products **21** and **31** as colorless oil (53 mg, 0.21 mmol, 69%, **21:31** = 89:11). These regioisomers were inseparable by column chromatography, and the ratio was determined by <sup>1</sup>H NMR.

The spectral data were in good agreement with literature values.<sup>9</sup>

**2l:**  $^1\text{H NMR}$  ( $\text{CDCl}_3$ , 500 MHz)  $\delta$  = 7.91 (s, 1H), 7.51 (d,  $J$  = 10.0 Hz, 1H), 6.91-6.82 (m, 2H), 1.36 (s, 12H).

**3l:**  $^1\text{H NMR}$  ( $\text{CDCl}_3$ , 500 MHz)  $\delta$  = 8.63 (s, 1H), 7.23 (t,  $J$  = 10.8 Hz, 1H), 6.77(d,  $J$  = 10.8 Hz, 1H), 1.40 (s, 12H), a phenolic *OH* is missing.

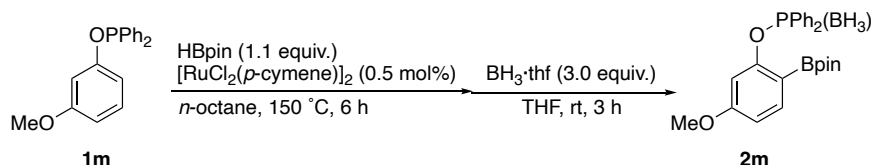

**Borylation of 1m:** A solution of  $[\text{RuCl}_2(p\text{-cymene})]_2$  (0.9 mg, 1.5  $\mu\text{mol}$ ) and **1m** (92.5 mg, 0.30 mmol) in *n*-octane (1.5 mL) was placed in a glass tube (inside diameter = 1.7 cm, length = 18 cm) equipped with a three-way stop cock under Ar. HBpin (47.4  $\mu\text{L}$ , 0.33 mmol) was added to the solution at room temperature, and the glass tube was closed. Then the mixture was stirred at 150  $^\circ\text{C}$  in the closed system. After 6 h, the solvent was removed under reduced pressure, and the obtained crude material was suspended in THF (1.0 mL).  $\text{BH}_3\cdot\text{thf}$  (0.9 M solution in THF, 1.5 mL, 1.4 mmol) was added to the solution at room temperature, and then the mixture was stirred for 3 h. The reaction was quenched by adding  $\text{H}_2\text{O}$  at 0  $^\circ\text{C}$ , and the obtained crude material was purified by silica gel chromatography (hexane: ethyl acetate = 5:1) to give the borylation product **2m** containing a small amount of **1m**. These compounds were inseparable, and the yield of **2m** was calculated to be 68% (0.21 mmol) by  $^1\text{H NMR}$ .

$^1\text{H NMR}$  ( $\text{CDCl}_3$ , 500 MHz)  $\delta$  = 8.06-7.98 (m, 4H), 7.65 (d,  $J$  = 8.8 Hz 1H), 7.58-7.42 (m, 6H), 6.71(s, 1H), 6.63 (d,  $J$  = 8.8 Hz, 1H), 3.67 (s, 1H), 1.27 (s, 12H),  $\text{BH}_3$  are missing.;  $^{13}\text{C NMR}$  ( $\text{CDCl}_3$ , 100 MHz)  $\delta$  =163.0, 158.8 (d  $J$  = 4.7 Hz), 138.2, 132.6, 132.3, 132.1, 132.0, 128.5 (d,  $J$  = 10.4 Hz) 110.4, 106.0 (d,  $J$  = 4.8 Hz), 83.5, 55.4, 25.0;  $^{31}\text{P NMR}$  ( $\text{CDCl}_3$ , 200 MHz)  $\delta$  = 107.6 (br),  $^{11}\text{B NMR}$  ( $\text{CDCl}_3$ , 158 MHz)  $\delta$  = 29.9 (br), -39.3 (br); IR (ATR) 2975.6, 2929.3, 2384.6, 1605.5, 1416.5, 1349.9, 1238.1, 1131.1, 1074.2  $\text{cm}^{-1}$ ; HRMS (FD): Calcd for  $\text{C}_{25}\text{H}_{31}\text{B}_2\text{O}_4\text{P}$   $[\text{M}]^+$ :448.2146; Found: 448.2138.

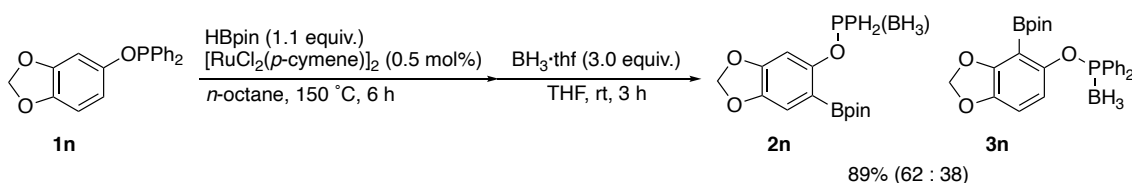

**Borylation of 1n:** A solution of  $[\text{RuCl}_2(p\text{-cymene})]_2$  (0.9 mg, 1.5  $\mu\text{mol}$ ) and **1n** (96.7 mg, 0.30 mmol) in *n*-octane (1.5 mL) was placed in a glass tube (inside diameter = 1.7 cm, length = 18 cm)

equipped with a three-way stop cock under Ar. HBpin (47.4  $\mu$ L, 0.33 mmol) was added to the solution at room temperature, and the glass tube was closed. Then the mixture was stirred at 150  $^{\circ}$ C in the closed system. After 6 h, the solvent was removed under reduced pressure, and the obtained crude material was suspended in THF (1.0 mL).  $\text{BH}_3\cdot\text{thf}$  (0.9 M solution in THF, 1.5 mL, 1.4 mmol) was added to the solution at room temperature, and then the mixture was stirred for 3 h. The reaction was quenched by adding  $\text{H}_2\text{O}$  at 0  $^{\circ}$ C, and the obtained crude material was purified by silica gel chromatography using toluene as an eluent to give a fraction of **2n** containing a small amount of **3n** (**2n:3n** = 93:7) and a fraction of **3n** containing a small amount of **1n** and **2n** (**1n:2n:3n** = 14:3:83). The yields were calculated to be 55% for **2n** (0.16 mmol) and 34% for **3n** (0.10 mmol) by  $^1\text{H}$  NMR.

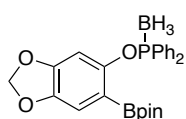

**2n** (white solid, 0.16 mmol, 55%)

$^1\text{H}$  NMR ( $\text{CDCl}_3$ , 500 MHz)  $\delta$  = 8.00-7.94 (m, 4H), 7.54-7.43 (m, 2H), 7.48-7.42 (m, 4H), 7.13 (s, 1H), 6.48 (s, 1H), 5.92 (s, 2H), 1.21 (s, 12H).  $\text{BH}_3$  are missing.;  $^{13}\text{C}$  NMR ( $\text{CDCl}_3$ , 100 MHz)  $\delta$  = 152.9 (d,  $J$  = 4.8 Hz), 150.6, 144.3, 132.7, 132.2, 132.1, 132.0, 128.6 (d,  $J$  = 10.8 Hz), 114.4, 102.9, 101.9, 83.7, 24.9;  $^{31}\text{P}$  NMR ( $\text{CDCl}_3$ , 200 MHz)  $\delta$  = 109.2 (br);  $^{11}\text{B}$  NMR ( $\text{CDCl}_3$ , 158 MHz)  $\delta$  = 30.1 (br), -39.8 (br); IR (ATR) 3059.5, 2975.6, 2385.5, 1725.0, 1619.9, 1485.9, 1424.2, 1370.2, 1315.2, 1241.9, 1110.8, 1037.5  $\text{cm}^{-1}$ ; HRMS (FD): Calcd for  $\text{C}_{25}\text{H}_{29}\text{B}_2\text{O}_5\text{P}$   $[\text{M}]^+$ : 462.1939; Found: 462.1928.

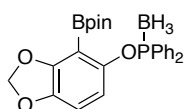

**3n** (white solid, 0.1 mmol, 34%)

$^1\text{H}$  NMR ( $\text{CDCl}_3$ , 500 MHz)  $\delta$  = 7.98-7.90 (m, 4H), 7.54-7.43 (m, 6H), 6.60 (d,  $J$  = 8.5 Hz, 1H), 6.33 (d,  $J$  = 8.5, 1.0 Hz, 1H), 5.99 (s, 2H), 1.21 (s, 12H);  $^{13}\text{C}$  NMR ( $\text{CDCl}_3$ , 100 MHz)  $\delta$  = 153.7, 151.1 (d  $J$  = 4.8 Hz), 144.0, 132.8, 132.3, 132.0, 131.9, 128.5 (d,  $J$  = 10.8 Hz) 112.7 (d,  $J$  = 4.8 Hz), 109.9, 101.7, 83.8, 24.9;  $^{31}\text{P}$  NMR ( $\text{CDCl}_3$ , 200 MHz)  $\delta$  = 108.6 (br);  $^{11}\text{B}$  NMR ( $\text{CDCl}_3$ , 158 MHz)  $\delta$  = 29.3 (br), -40.2 (br); IR (ATR) 2974.7, 2917.8, 2397.1, 1638.2, 1437.7, 1329.7, 1209.2, 1135.9, 1050.1  $\text{cm}^{-1}$ ; HRMS (FD): Calcd for  $\text{C}_{25}\text{H}_{29}\text{B}_2\text{O}_5\text{P}$   $[\text{M}]^+$ : 462.1939; Found: 462.1956.

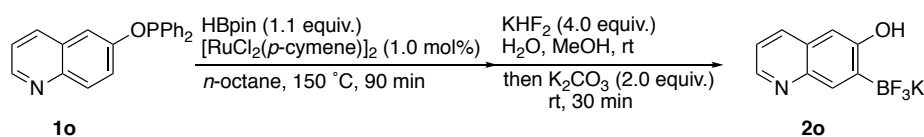

**Borylation of 1o:** A solution of  $[\text{RuCl}_2(p\text{-cymene})]_2$  (1.8 mg, 3.0  $\mu\text{mol}$ ) and **1o** (98.8 mg, 0.30 mmol) in *n*-octane (1.5 mL) was placed in a glass tube (inside diameter = 1.7 cm, length = 18 cm) equipped with a three-way stop cock under Ar. HBpin (47.4  $\mu\text{L}$ , 0.33 mmol) was added to the solution at room temperature, and the glass tube was closed. Then the mixture was stirred at 150 °C in the closed system for 90 min. After removal of the solvent under reduced pressure,  $\text{H}_2\text{O}$  (1.0 mL),  $\text{KHF}_2$  (93.7 mg, 1.2 mmol), and MeOH (1.0 mL) were successively added and then stirred at room temperature. After 24 h,  $\text{K}_2\text{CO}_3$  (80.5 mg, 0.6 mmol) was added to the solution, and the mixture was stirred for 30 min. The suspension was evaporated at 40 °C for 20 min, and the resulting beige solids were collected by filtration, which were rinsed with a small amount of cold MeOH to give **2o** containing small amounts of  $\text{KBF}_4$  and  $\text{K}[\text{HOBF}_3]$  (ca. **2o**: $\text{KBF}_4$ : $\text{K}[\text{HOBF}_3]$  = 100:2:5 in  $^{19}\text{F}$  NMR) (60.3 mg). The yield of **2o** was calculated to be 78%.

$^1\text{H}$  NMR (dms- $d_6$ , 500 MHz)  $\delta$  = 8.55 (dd,  $J$  = 4.5, 1.5 Hz, 1H), 7.99 (d,  $J$  = 8.0 Hz, 1H), 7.88-7.78 (m, 2H), 7.25 (dd,  $J$  = 8.0, 4.0 Hz, 1H), 6.92 (s, 1H;  $^{13}\text{C}$  NMR (dms- $d_6$ , 100 MHz)  $\delta$  = 158.7, 146.1, 143.7, 133.4, 133.1, 128.3, 120.1, 106.2, 1C(C-B) is missing.;  $^{19}\text{F}$  NMR (dms- $d_6$ , 465 MHz),  $\delta$  = -136.1;  $^{11}\text{B}$  NMR (dms- $d_6$ , 158 MHz)  $\delta$  = 2.26 (br); IR (ATR) 3045.2, 2926.0, 1625.1, 1440.6, 1416.4, 1349.3, 1330.7, 1222.6, 1157.3, 1114.5  $\text{cm}^{-1}$ ; HRMS (ESI-) Calcd for  $\text{C}_9\text{H}_6\text{BF}_3\text{NO} [\text{M}-\text{K}]^-$ : 212.0495; Found: 212.0504.

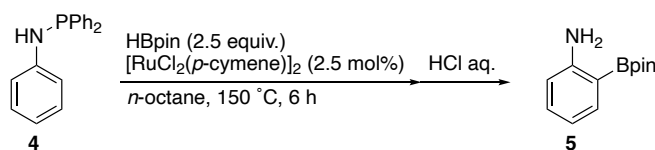

**Borylation of 4:** A solution of  $[\text{RuCl}_2(p\text{-cymene})]_2$  (0.9 mg, 1.5  $\mu\text{mol}$ ) and **4** (83.2 mg, 0.30 mmol) in *n*-octane (1.5 mL) was placed in a glass tube (inside diameter = 1.7 cm, length = 18 cm) equipped with a three-way stop cock under Ar. HBpin (47.4  $\mu\text{L}$ , 0.33 mmol) was added to the solution at room temperature, and the glass tube was closed. Then the mixture was stirred at 150 °C in the closed system for 6 h. 1N HCl aq. was added to the solution at room temperature, and the mixture was stirred for 24 h. The mixture was extracted with AcOEt three times, and the combined organic layers were washed with brine and dried over  $\text{MgSO}_4$ . After the filtration of the drying

agent, the filtrate was evaporated to give a crude product. The crude product was purified by silica gel chromatography (hexane: ethyl acetate = 20:1) to give the borylation products **5** as a colorless oil (30 mg, 0.14 mmol, 46%).

The spectral data were in good agreement with the literature values.<sup>10</sup>

<sup>1</sup>H NMR (CDCl<sub>3</sub>, 400 MHz)  $\delta$  = 7.61 (dd,  $J$  = 7.6, 1.6 Hz, 1H), 7.24-7.18 (m, 1H), 6.67 (t,  $J$  = 7.6 Hz, 1H), 6.59 (d,  $J$  = 7.6 Hz, 1H), 4.73 (br s, 2H), 1.34 (s, 12H).



### Procedure for C–H borylation of aryl phosphites (Scheme 3)

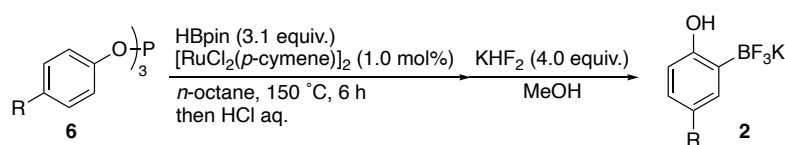

A solution of  $[\text{RuCl}_2(p\text{-cymene})]_2$  (1.8 mg, 3.0  $\mu\text{mol}$ ) and aryl phosphite **6** (0.30 mmol) in  $n$ -octane (1.5 mL) was placed in a glass tube (inside diameter = 1.7 cm, length = 18 cm) equipped with a three-way stop cock under Ar. HBpin (133.7  $\mu\text{L}$ , 0.93 mmol) was added to the solution at room temperature, and the glass tube was closed. Then the mixture was stirred at 150 °C in the closed system for 6 h. 4N HCl aq. was added to the solution at room temperature, and the mixture was stirred for 48 h. The mixture was extracted with AcOEt three times, and the combined organic layers were washed with brine and dried over  $\text{MgSO}_4$ . After filtration to remove the drying agent, the filtrate was evaporated to give a crude product. To a MeOH solution (1.5 mL) of the crude product was added  $\text{KHF}_2$  (281 mg, 3.6 mmol) at room temperature, and the mixture was stirred for 24 h. The suspension was evaporated at 40 °C for 20 min, and residual white solids were dissolved in acetone (5.0 mL). After insoluble salts were filtered off, the filtrate was concentrated to ca. 1 mL volume. Then, toluene (ca. 1 mL) was added, and the remaining acetone was removed under reduced pressure to give suspension in toluene. The resulting beige solids were collected by filtration and rinsed with excess  $n$ -hexane and a small amount of cold MeOH (ca. 0 °C) to give aryl trifluoroborate **2**.

### Procedure for one-pot borylation of phenol (Scheme 4)

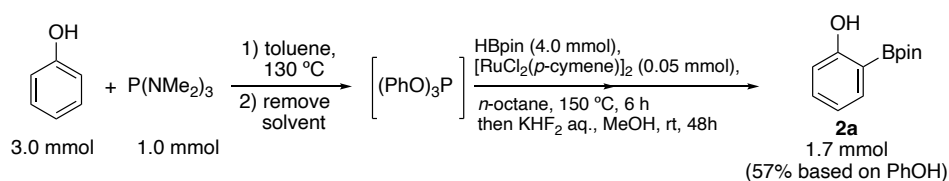

A solution of phenol (282 mg, 3.0 mmol) and  $\text{P}(\text{NMe}_2)_3$  (181.3  $\mu\text{L}$ , 1.0 mmol) in toluene (1.0 mL) was placed in a 50 mL Schlenk flask under Ar, and the glass tube was closed. Then the mixture was stirred at 130 °C in the closed system. After 8 h, the solvent was removed under reduced pressure at 100 °C for 1 h to give triphenyl phosphite **6a**. To the same flask was added  $[\text{RuCl}_2(p\text{-cymene})]_2$  (30.6 mg, 50  $\mu\text{mol}$ ),  $n$ -octane (5.0 mL) and HBpin (575.2  $\mu\text{L}$ , 4.0 mmol) under Ar, and then the mixture was stirred at 150 °C in the closed system. After 6 h,  $\text{KHF}_2$  (937 mg, 12 mmol), MeOH (3.0 mL) and  $\text{H}_2\text{O}$  (2.0 mL) were added at room temperature, and the solution was stirred for 24 h. After removal of volatile materials, the residual white solids were dissolved in acetone (10~15 mL). After insoluble salts were filtered off, the filtrate was concentrated to ca. 1 mL volume. Then, toluene (ca.

3 mL) was added, and the remaining acetone was removed under reduced pressure to give suspension in toluene. The resulting beige solids were collected by filtration and rinsed with excess *n*-hexane and a small amount of cold MeOH (ca. 0°C) to give aryl trifluoroborate **2a** as white solids (342 mg, 1.7 mmol, 57% based on phenol).

## Deuterium labeling experiments

### 1. Intermolecular competition experiment (Scheme 5a)

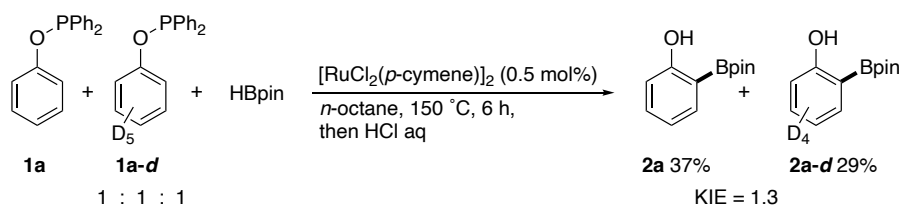

A solution of  $[RuCl_2(p\text{-cymene})]_2$  (0.9 mg, 1.5  $\mu\text{mol}$ ), **1a** (41.7 mg, 0.15 mmol) and **1a-d** (42.5 mg, 0.15 mmol) in *n*-octane (1.5 mL) was placed in a glass tube (inside diameter = 1.7 cm, length = 18 cm) equipped with a three-way stop cock under Ar. HBpin (21.6  $\mu\text{L}$ , 0.15 mmol) was added to the solution at room temperature, and the glass tube was closed. Then the mixture was stirred at 150 °C in the closed system for 6 h. 1N HCl aq. was added to the solution at room temperature, and the mixture was stirred for 24 h. The mixture was extracted with AcOEt three times, and the combined organic layers were washed with brine and dried over  $MgSO_4$ . After the filtration of the drying agent, the filtrate was evaporated to give a pale-yellow oil. The yields of borylation products were determined to be **2a** = 37% and **2a-d** = 29% by  $^1H$  NMR using tetrachloroethane (10  $\mu\text{L}$ , 0.095 mmol) as an internal standard. Therefore, the intermolecular KIE was calculated to be KIE = 1.3.

### 2. Reaction of **1a** with DBpin (Scheme 5b)

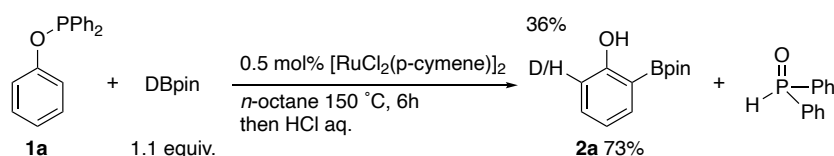

A solution of  $[RuCl_2(p\text{-cymene})]_2$  (0.9 mg, 1.5  $\mu\text{mol}$ ) and **1a** (83.5 mg, 0.3 mmol) in *n*-octane (1.5 mL) was placed in a glass tube (inside diameter = 1.7 cm, length = 18 cm) equipped with a three-way stop cock under Ar. DBpin (47.8  $\mu\text{L}$ , 0.33 mmol) was added to the solution at room temperature, and the glass tube was closed. Then the mixture was stirred at 150 °C in the closed system for 6 h. 1N HCl aq. was added to the solution at room temperature, and the mixture was stirred for 24 h. The mixture was extracted with AcOEt three times, and the combined organic layers were washed with brine and dried over  $MgSO_4$ . After the filtration of the drying agent, the filtrate was evaporated to give a pale-yellow oil. The yields of **2a** was determined to be 73% with 36% deuterium incorporation by  $^1H$  NMR using tetrachloroethane (10  $\mu\text{L}$ , 0.095 mmol) as an internal standard.

## **References**

1. R. Bedford, S. Hazelwood, P. Horton and M. Hursthouse, *Dalton Trans.* **2003**, 4164.
2. S. Lal, J. McNally, A. White and S. Díez-González *Organometallics* **2011**, *30*, 6225.
3. E. Erasmus, *J. Electroanal. Chem.* **2014**, *727*, 1.
4. B. Punji, C. Ganesamoorthy, M. Balakrishna, *J. Mol. Cat. A: Chem.*, **2006**, *259*, 78.
5. P. Aguirre, C. Lagos, S. Moya, C. Zúñiga, C. Vera-Oyarce, E. Sola, G. Perisd and J. Bayón, *Dalton Trans.* **2007**, 5419.
6. C. Cazorla, T. De Vries and E. Vedejs, *Org. Lett.* **2013**, *15*, 984.
7. E. Oblak, M. VanHeyst, J. Li, A. Wiemer and D. Wright, *J. Am. Chem. Soc.* **2014**, *136*, 4309.
8. T. Boebel and J. Hartwig, *J. Am. Chem. Soc.* **2008**, *130*, 7534.
9. B. Chattopadhyay, J. Dannatt, I. Sanctis, K. Gore, R. Maleczka, D. Singleton and M. Smith, III, *J. Am. Chem. Soc.* **2017**, *139*, 7864.
10. C. Kong, N. Jana, C. Jones and T. Driver, *J. Am. Chem. Soc.* **2016**, *138*, 13271.



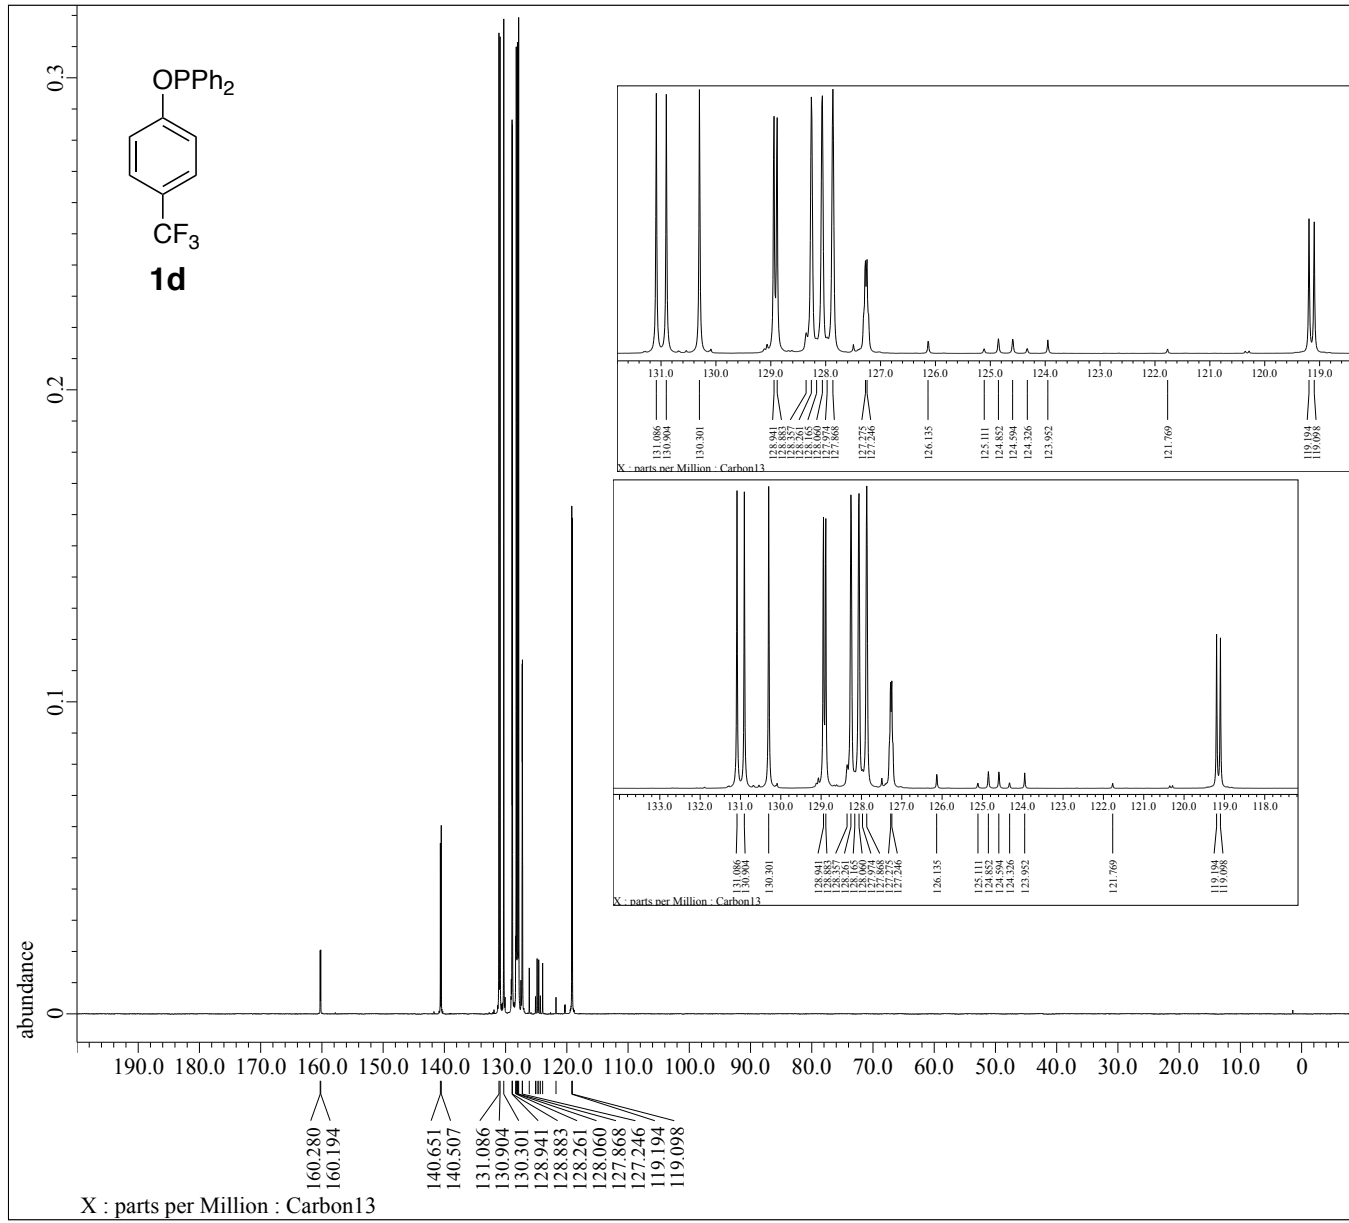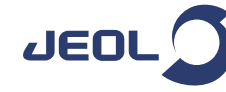

```

---- PROCESSING PARAMETERS ----
sexp( 2.0[Hz], 0.0[s] )
trapezoid( 0[%], 0[%], 80[%], 100[%] )
zerofill( 1, TRUE )
fft( 1, TRUE, TRUE )
machinephase
ppm
phase( 0.75, 0, 50[%] )
base_correct( Akima, 5, 0, FALSE, 3, None, FA
Derived from: YH(S-p-CF3)_Carbon-1-1.jdf

```

```

Filename      = YH(S-p-CF3)_Carbon
Author        = delta
Experiment    = carbon.jxp
Sample Id     = YH(S-p-CF3)
Solvent       = BENZENE-D6
Actual_Start_Time = 4-APR-2020 18:22:
Revision_Time  = 9-APR-2020 14:01:

```

```

Comment       = single pulse decou
Data Format    = 1D REAL
Dim Size      = 26214
X Domain      = Carbon13
Dim Title     = Carbon13
Dim Units     = [ppm]
Dimensions    = X
Spectrometer  = JNM-ECZ500R/S1

```

```

Field Strength = 11.62926421[T] (50
X Acq Duration = 0.8388608[s]
X Domain       = 13C
X Freq        = 124.5010059[MHz]
X Offset      = 100[ppm]
X Points      = 32768
X Prescans    = 4
X Resolution  = 1.1920929[Hz]
X Sweep       = 39.0625[kHz]
X Sweep Clipped = 31.25[kHz]
Irr Domain    = Proton
Irr Freq     = 495.13191398[MHz]
Irr Offset    = 5[ppm]
Clipped      = FALSE
Scans        = 1668
Total_Scans  = 1668

```

```

Relaxation_Delay = 2[s]
Recvr Gain       = 56
Temp_Get        = 20.8[dC]
X 90_Width      = 9.61[us]
X Acq Time      = 0.8388608[s]
X Angle         = 30[deg]
X Atn           = 10[dB]
X Pulse         = 3.20333333[us]
Irr Atn Dec     = 23.948[dB]
Irr Atn Dec Calc = 23.948[dB]
Irr Atn Dec Default_Calc = 23.948[dB]
Irr Atn Noe     = 23.948[dB]
Irr Dec Bandwidth_Hz = 5.97826087[kHz]
Irr Dec Bandwidth_Ppm = 12.07407703[ppm]
Irr Dec Freq    = 495.13191398[MHz]
Irr Dec Merit Factor = 2.2
Irr Decoupling  = TRUE
Irr Noe        = TRUE
Irr Noise      = WALTZ

```

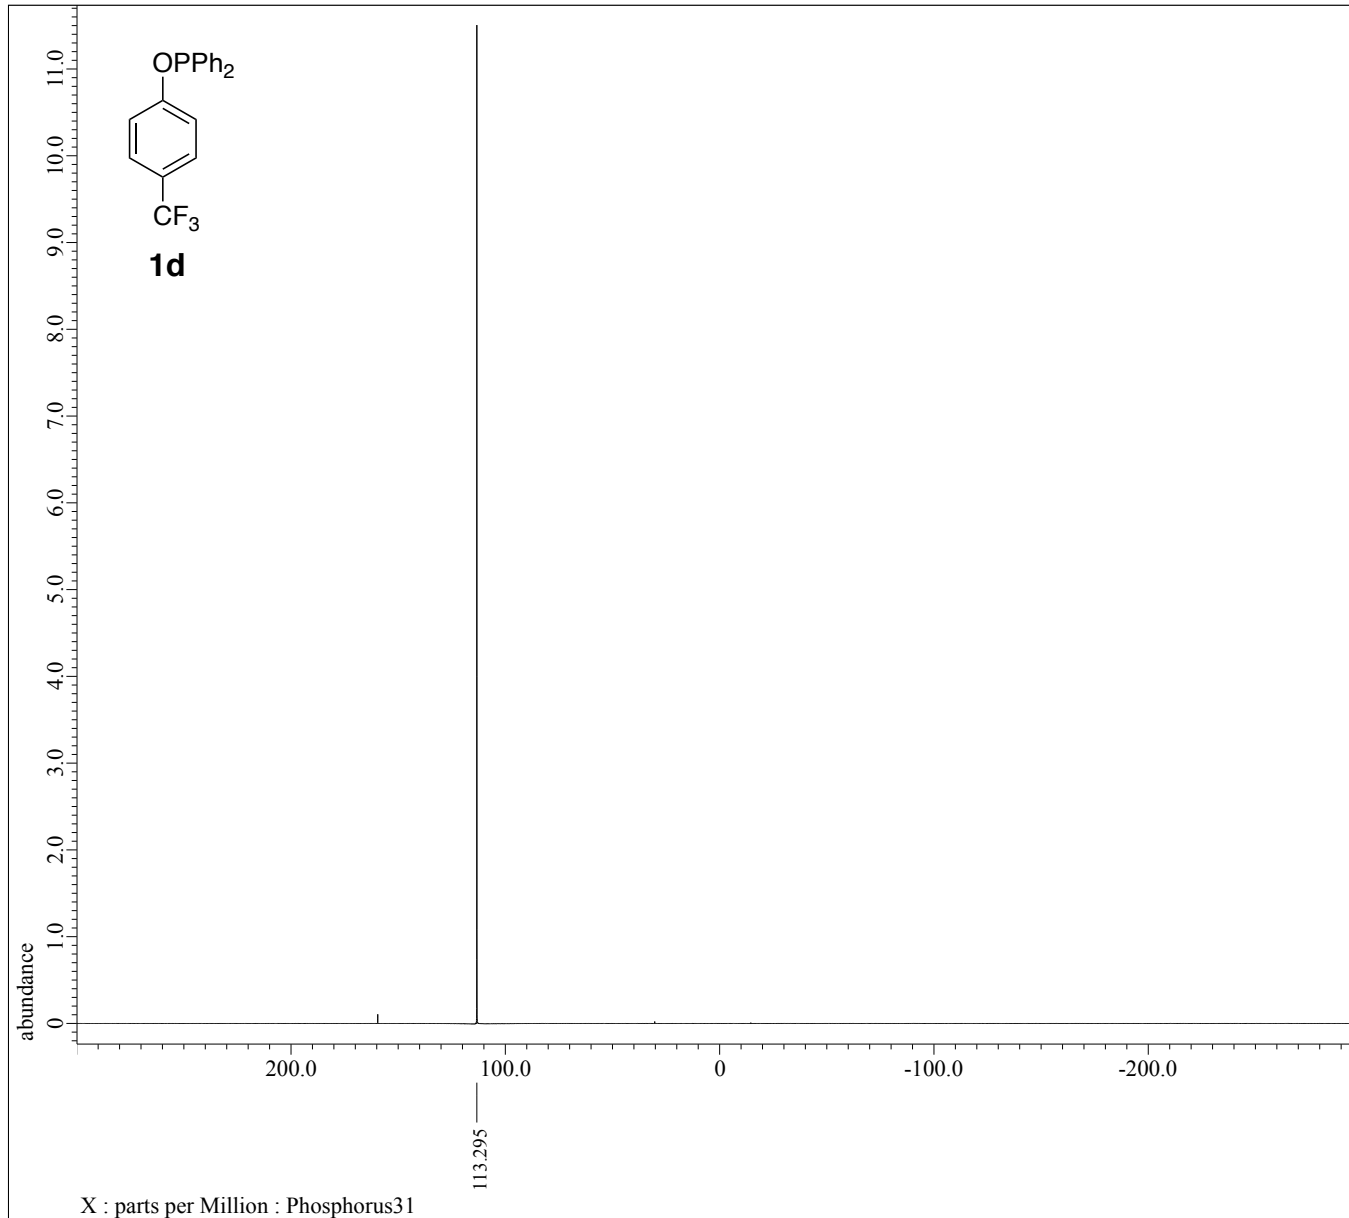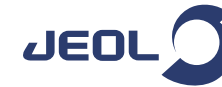

```

---- PROCESSING PARAMETERS ----
sexp( 2.0[Hz], 0.0[s] )
trapezoid( 0[%], 0[%], 80[%], 100[%] )
zerofill( 1, TRUE )
fft( 1, TRUE, TRUE )
machinephase
ppm
phase( -91, 0, 50[%] )
base_correct( Akima, 5, 0, FALSE, 3, None, FA
Derived from: YH(S-p-CF3)_31P_1Hdec-1-1.jdf

```

```

Filename           = YH(S-p-CF3)_31P_1H
Author             = delta
Experiment         = single_pulse_decou
Sample_Id          = YH(S-p-CF3)
Solvent            = BENZENE-D6
Actual_Start_Time  = 3-APR-2020 19:21:
Revision_Time      = 7-APR-2020 12:36:

Comment           = single_pulse decou
Data_Format       = 1D REAL
Dim_Size          = 26214
X_Domain          = Phosphorus31
Dim_Title         = Phosphorus31
Dim_Units         = [ppm]
Dimensions        = X
Spectrometer      = JNM-ECZ500R/S1

Field_Strength    = 11.62926421[T] (50
X_Acq_Duration    = 0.18874368[s]
X_Domain          = 31P
X_Freq            = 200.43293989[MHz]
X_Offset          = 0[ppm]
X_Points          = 32768
X_Prescans        = 4
X_Resolution      = 5.29819065[Hz]
X_Sweep           = 173.61111111[kHz]
X_Sweep_Clipped   = 138.88888889[kHz]
Irr_Domain        = Proton
Irr_Freq          = 495.13191398[MHz]
Irr_Offset        = 5[ppm]
Clipped           = FALSE
Scans             = 64
Total_Scans       = 64

Relaxation_Delay  = 1[s]
Recvr_Gain        = 56
Temp_Get          = 20.3[dC]
X_90_Width        = 19.78[us]
X_Acq_Time        = 0.18874368[s]
X_Angle           = 30[deg]
X_Atn             = 9.4[dB]
X_Pulse           = 6.59333333[us]
Irr_Atn_Dec       = 23.948[dB]
Irr_Atn_Dec_Calc = 23.948[dB]
Irr_Atn_Dec_Default_Calc = 23.948[dB]
Irr_Atn_Noise    = 23.948[dB]
Irr_Dec_Bandwidth_Hz = 5.97826087[kHz]
Irr_Dec_Bandwidth_Ppm = 12.07407703[ppm]
Irr_Dec_Freq     = 495.13191398[MHz]
Irr_Dec_Merit_Factor = 2.2
Irr_Decoupling   = TRUE
Irr_Noise        = TRUE
Irr_Noise        = WALTZ

```

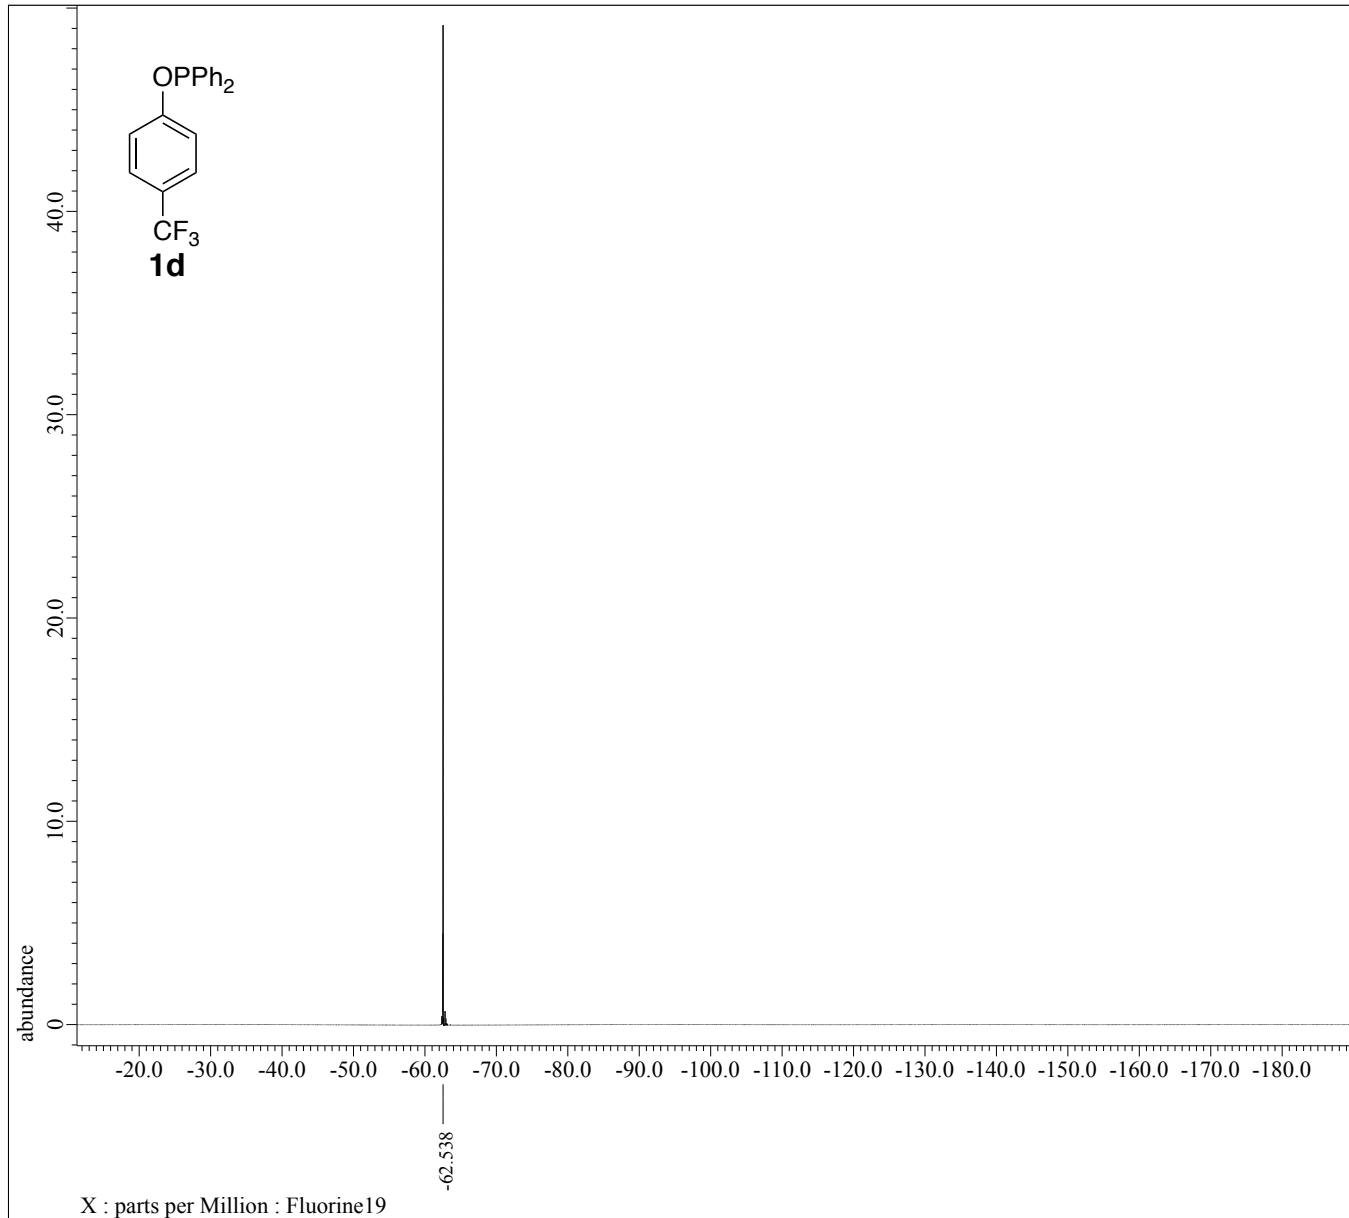

```

---- PROCESSING PARAMETERS ----
sexp( 0.2[Hz], 0.0[s] )
trapezoid( 0[%], 0[%], 80[%], 100[%] )
zerofill( 1, TRUE )
fft( 1, TRUE, TRUE )
machinephase
ppm
phase( 12.76831, 0, 50[%] )

Derived from: YH(S-p-CF3)_19F-1-1.jdf

```

```

Filename      = YH(S-p-CF3)_19F-1-2.j
Author       = delta
Experiment    = single_pulse.jxp
Sample_Id     = YH(S-p-CF3)
Solvent       = BENZENE-D6
Actual_Start_Time = 3-APR-2020 19:26:29
Revision_Time = 7-APR-2020 14:33:15

Comment      = single_pulse
Data_Format   = 1D COMPLEX
Dim_Size     = 26214
X_Domain     = Fluorine19
Dim_Title    = Fluorine19
Dim_Units    = [ppm]
Dimensions   = X
Spectrometer = JNM-ECZ500R/s1

Field_Strength = 11.62926421[T] (500[M]
X_Acq_Duration = 0.28311552[s]
X_Domain      = 19F
X_Freq       = 465.88941346[MHz]
X_Offset     = -100[ppm]
X_Points     = 32768
X_Prescans   = 1
X_Resolution = 3.5321271[Hz]
X_Sweep      = 115.74074074[kHz]
X_Sweep_Clip = 92.59259259[kHz]
Irr_Domain   = Fluorine19
Irr_Freq    = 465.88941346[MHz]
Irr_Offset  = 5[ppm]
Tri_Domain   = Fluorine19
Tri_Freq    = 465.88941346[MHz]
Tri_Offset  = 5[ppm]
Clipped     = FALSE
Scans       = 8
Total_Scans = 8

Relaxation_Delay = 5[s]
Recvr_Gain       = 36
Temp_Get         = 20.2[dC]
X_90_Width      = 11[us]
X_Acq_Time      = 0.28311552[s]
X_Angle         = 45[deg]
X_Atn           = 3.7[dB]
X_Pulse         = 5.5[us]
Irr_Mode        = Off
Tri_Mode        = Off
Dante_Loop     = 500
Dante_Preset   = FALSE
Decimation_Rate = 0
Initial_Wait    = 1[s]
Phase           = {0, 90, 270, 180, 180}
Preset_Time     = 5[s]

```



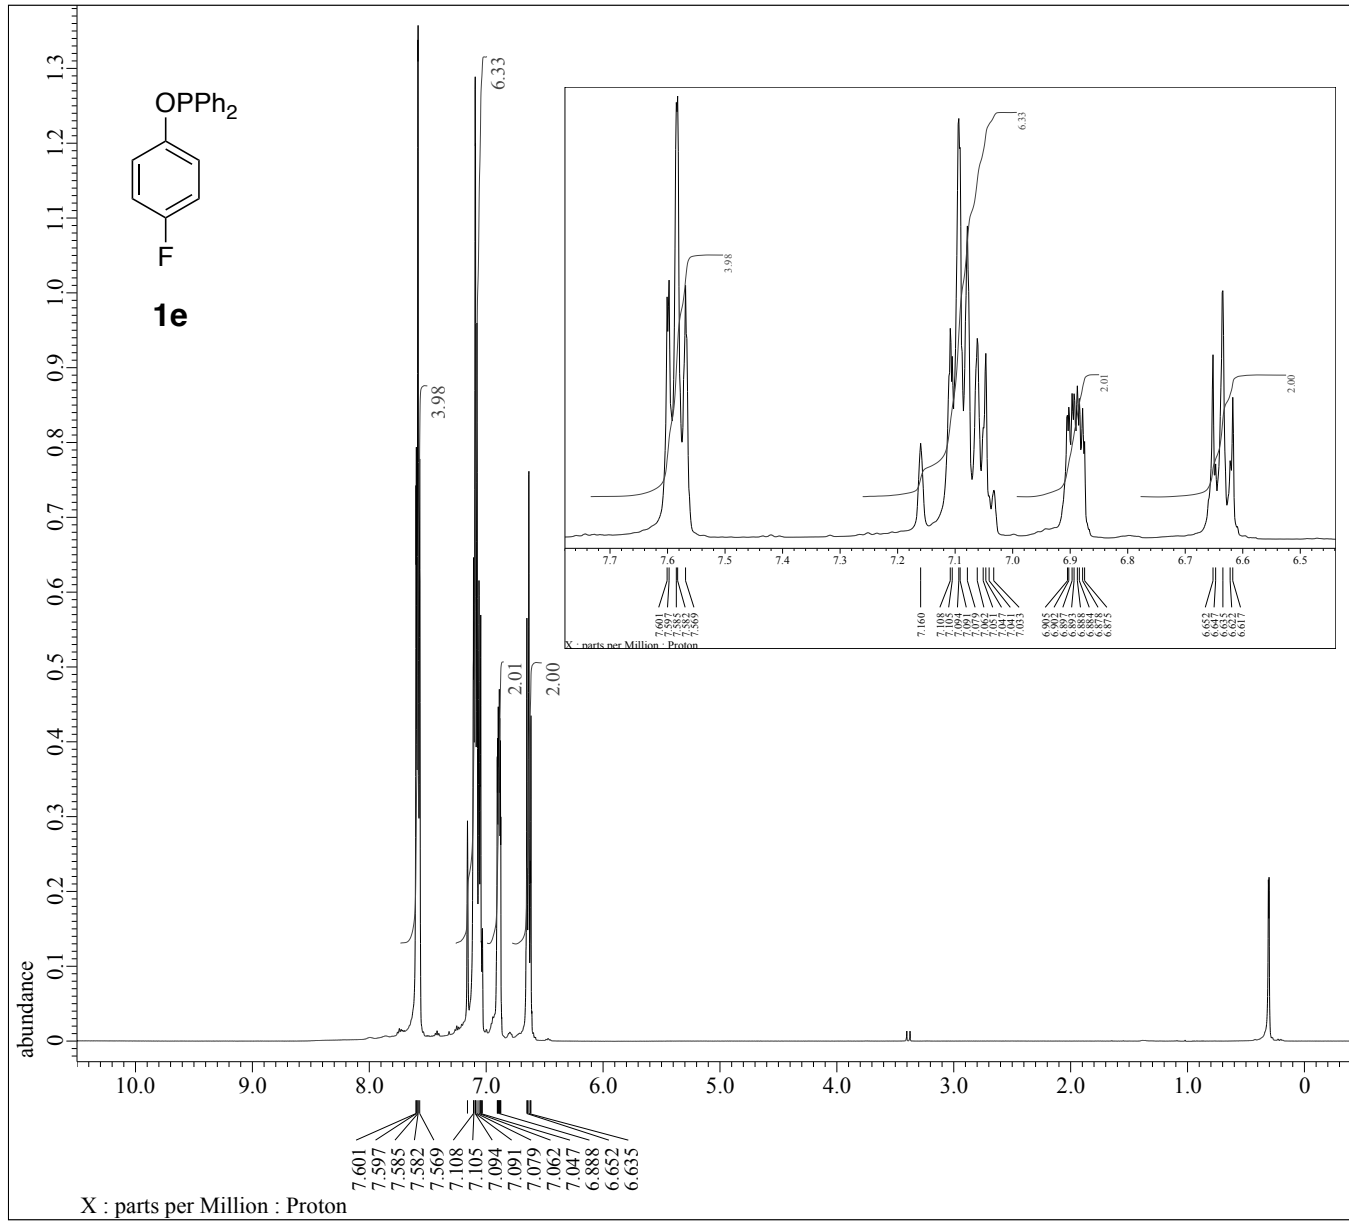

```

---- PROCESSING PARAMETERS ----
sexp( 0.2[Hz], 0.0[s] )
trapezoid( 0[%], 0[%], 80[%], 100[%] )
zerofill( 1, TRUE )
fft( 1, TRUE, TRUE )
machinephase
ppm
phase( 27.60676, 0, 50[%] )
base_correct( Akima, 5, 0, FALSE, 3, None, FA

Derived from: YH(S-p-F)_Proton-1-1.jdf
  
```

```

Filename      = YH(S-p-F)_Proton-1-2.
Author        = delta
Experiment    = proton.jxp
Sample_Id     = YH(S-p-F)
Solvent       = BENZENE-D6
Actual_Start_Time = 2-APR-2020 04:31:53
Revision_Time = 10-APR-2020 19:12:01
  
```

```

Comment      = single pulse
Data Format   = 1D REAL
Dim Size     = 13107
X Domain     = Proton
Dim Title    = Proton
Dim Units    = [ppm]
Dimensions   = X
Spectrometer = JNM-ECZ500R/s1
  
```

```

Field Strength = 11.62926421[T] (500[M]
X Acq Duration = 1.76422912[s]
X Domain       = 1H
X Freq         = 495.13191398[MHz]
X Offset       = 5[ppm]
X Points       = 16384
X Prescans     = 1
X Resolution   = 0.5668198[Hz]
X Sweep        = 9.28677563[kHz]
X Sweep Clipped = 7.42942051[kHz]
Irr Domain     = Proton
Irr Freq       = 495.13191398[MHz]
Irr Offset     = 5[ppm]
Tri Domain     = Proton
Tri Freq       = 495.13191398[MHz]
Tri Offset     = 5[ppm]
Clipped        = FALSE
Scans          = 8
Total_Scans    = 8
  
```

```

Relaxation_Delay = 5[s]
Recvr Gain       = 36
Temp_Get         = 20.9[dC]
X 90 Width      = 9.58[us]
X Acq Time       = 1.76422912[s]
X Angle          = 45[deg]
X Atn            = 4.3[dB]
X Pulse         = 4.79[us]
Irr Mode        = Off
Tri Mode        = Off
Dante Loop      = 500
Dante Presat    = FALSE
Decimation Rate = 0
Initial_Wait    = 1[s]
Phase           = {0, 90, 270, 180, 180
Presat_Time     = 5[s]
  
```

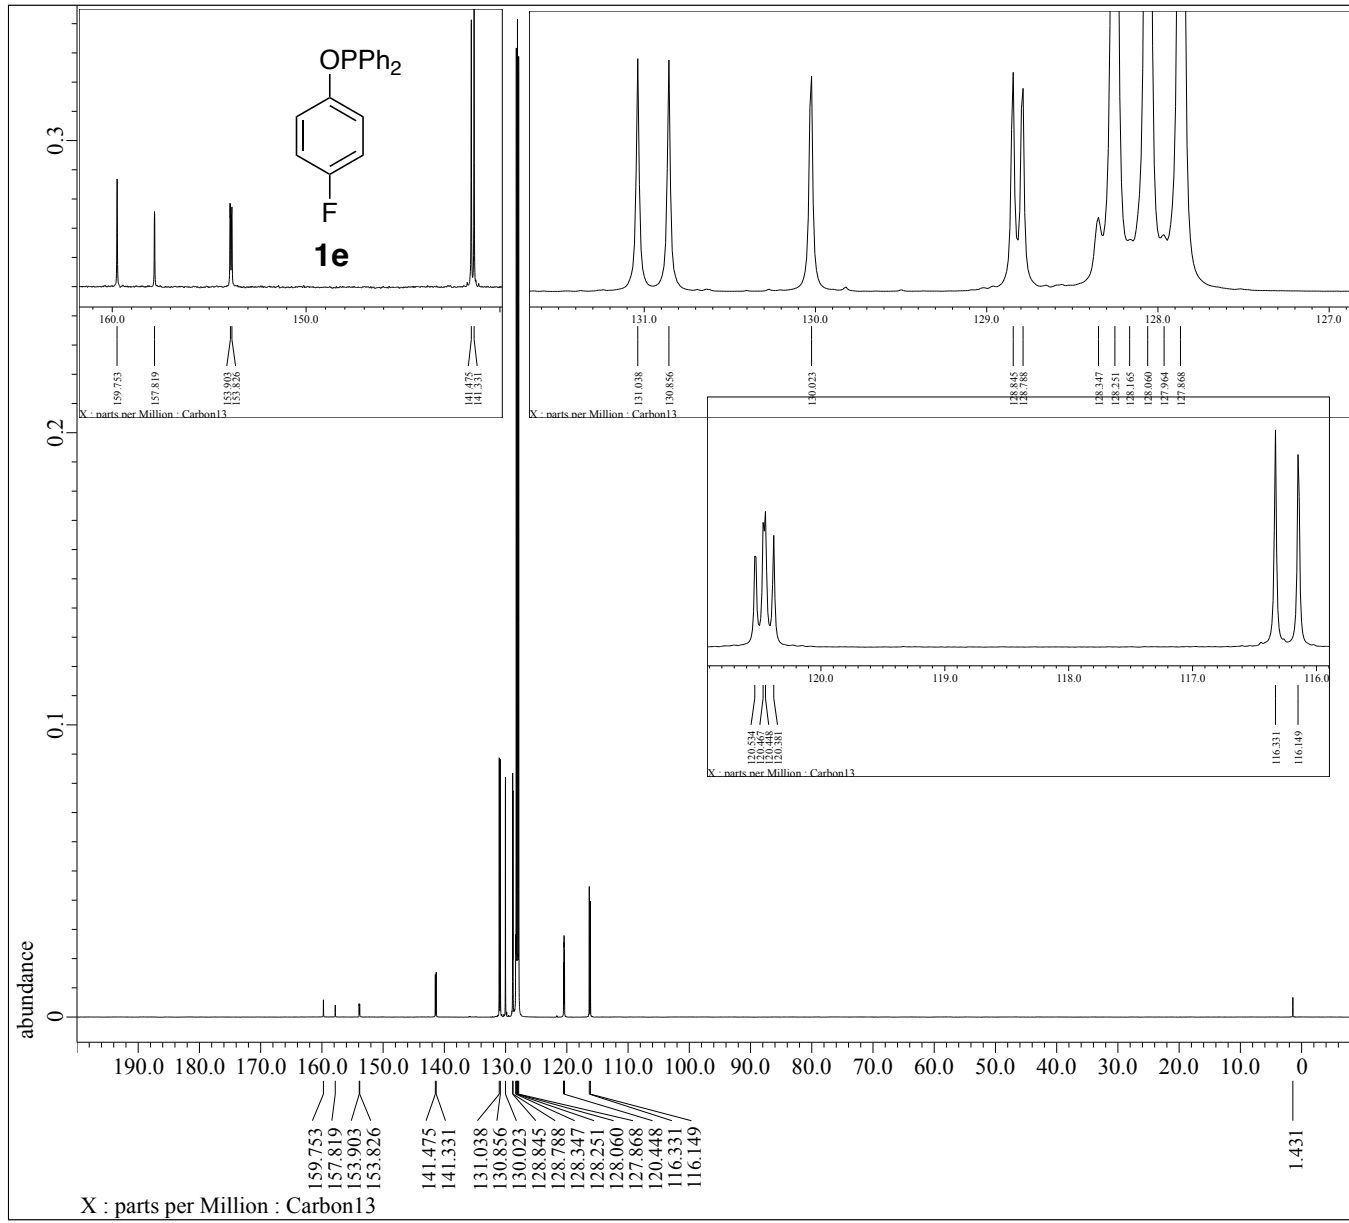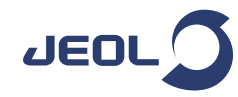

```

---- PROCESSING PARAMETERS ----
sexp( 2.0[Hz], 0.0[s] )
trapezoid( 0[%], 0[%], 80[%], 100[%] )
zerofill( 1, TRUE )
fft( 1, TRUE, TRUE )
machinephase
ppm
phase( -1.5, -1, 50[%] )
base_correct( Akima, 5, 0, FALSE, 3, None, FA
Derived from: YH(S-p-F)_Carbon-1-1.jdf

```

```

Filename      = YH(S-p-F)_Carbon-1
Author        = delta
Experiment    = carbon.jxp
Sample Id     = YH(S-p-F)
Solvent       = BENZENE-D6
Actual_Start_Time = 4-APR-2020 12:36:
Revision_Time  = 10-APR-2020 19:28:

Comment       = single pulse decou
Data Format    = 1D REAL
Dim Size      = 26214
X Domain      = Carbon13
Dim Title     = Carbon13
Dim Units     = [ppm]
Dimensions    = X
Spectrometer  = JNM-ECZ500R/S1

Field Strength = 11.62926421[T] (50
X Acq Duration = 0.8388608[s]
X Domain       = 13C
X Freq         = 124.5010059[MHz]
X Offset       = 100[ppm]
X Points       = 32768
X Prescans     = 4
X Resolution   = 1.1920929[Hz]
X Sweep        = 39.0625[kHz]
X Sweep Clipped = 31.25[kHz]
Irr Domain     = Proton
Irr Freq       = 495.13191398[MHz]
Irr Offset     = 5[ppm]
Clipped        = FALSE
Scans          = 5000
Total_Scans    = 5000

Relaxation_Delay = 2[s]
Recvr Gain       = 56
Temp_Get         = 19.6[dC]
X 90_Width      = 9.61[us]
X Acq Time       = 0.8388608[s]
X Angle          = 30[deg]
X Atn            = 10[dB]
X Pulse         = 3.20333333[us]
Irr Atn Dec     = 23.948[dB]
Irr Atn Dec Calc = 23.948[dB]
Irr Atn Dec Default_Calc = 23.948[dB]
Irr Atn Noe     = 23.948[dB]
Irr Dec Bandwidth_Hz = 5.97826087[kHz]
Irr Dec Bandwidth_Ppm = 12.07407703[ppm]
Irr Dec Freq    = 495.13191398[MHz]
Irr Dec Merit Factor = 2.2
Irr Decoupling = TRUE
Irr Noe         = TRUE
Irr Noise       = WALTZ

```

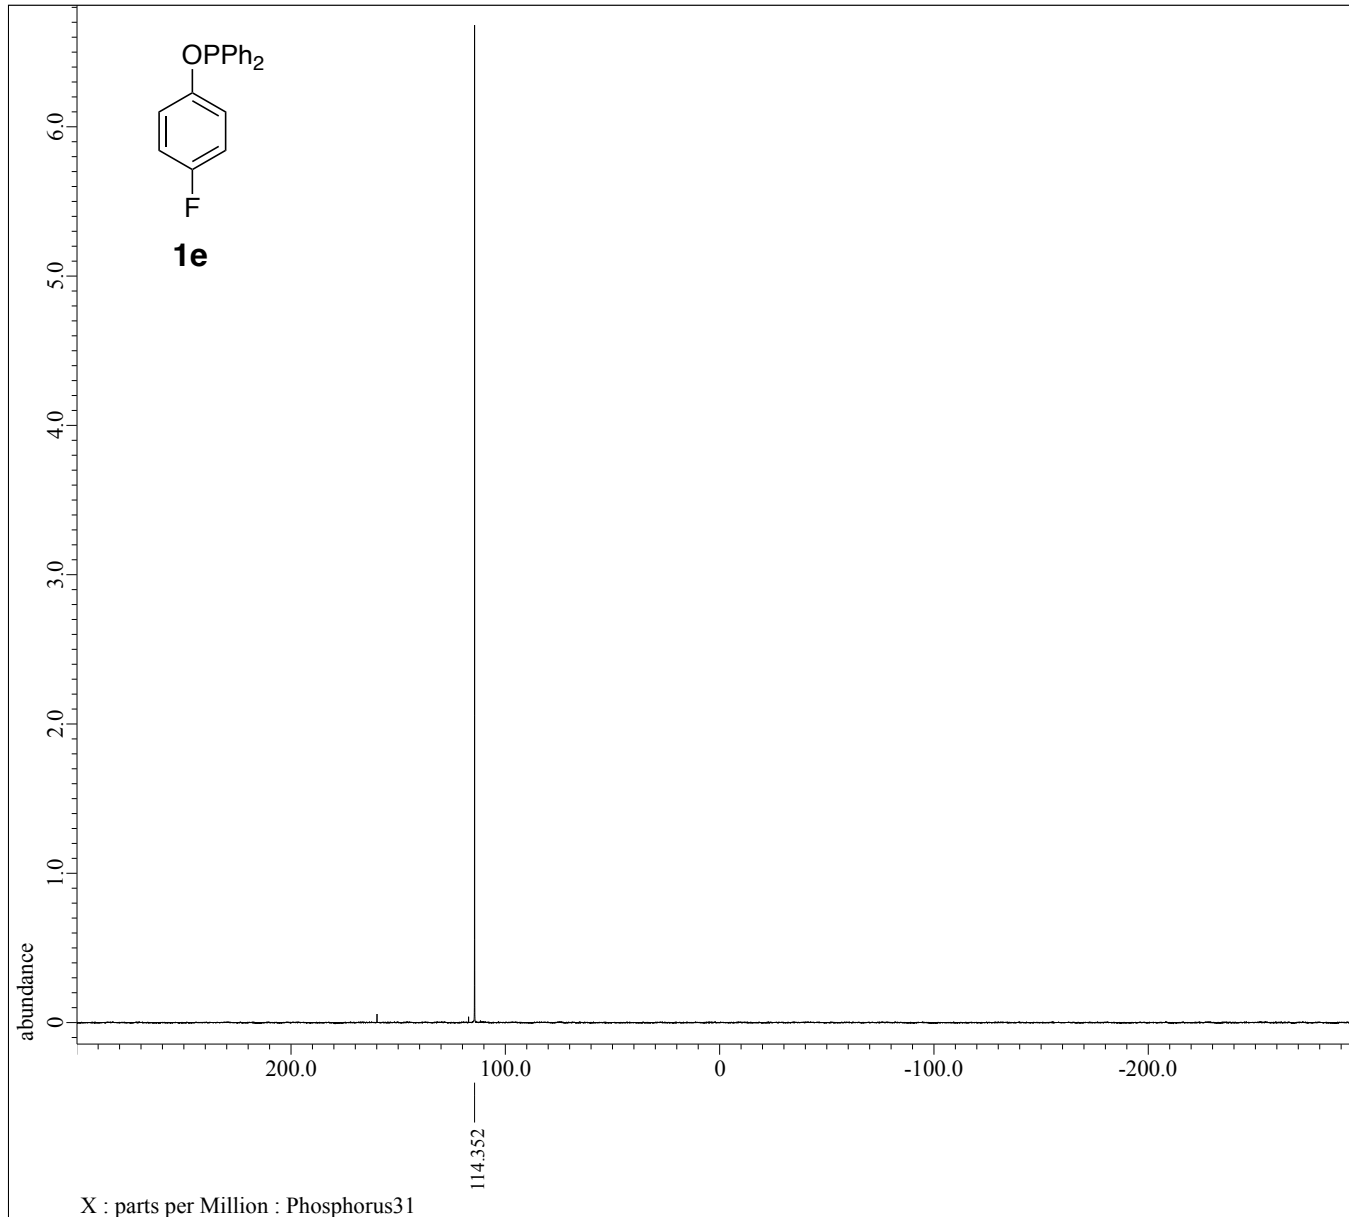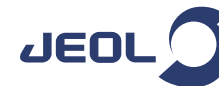

```

---- PROCESSING PARAMETERS ----
sexp( 2.0[Hz], 0.0[s] )
trapezoid( 0[%], 0[%], 80[%], 100[%] )
zerofill( 1, TRUE )
fft( 1, TRUE, TRUE )
machinephase
ppm
phase( 27, 0, 50[%] )
ibase_correct( , FALSE, FALSE, FALSE )
base_correct( Akima, 5, 0, FALSE, 3, None, FA
base_correct( Akima, 5, 0, FALSE, 3, None, FA
Derived from: YH(S-p-F)_31P_1Hdec-1-1.jdf

```

```

Filename           = YH(S-p-F)_31P_1Hdec
Author             = delta
Experiment         = single_pulse_decou
Sample_Id          = YH(S-p-F)
Solvent            = BENZENE-D6
Actual_Start_Time  = 2-APR-2020 11:55:
Revision_Time      = 7-APR-2020 12:34:

Comment           = single_pulse decou
Data_Format       = 1D REAL
Dim_Size          = 26214
X_Domain          = Phosphorus31
Dim_Title         = Phosphorus31
Dim_Units         = [ppm]
Dimensions        = X
Spectrometer      = JNM-ECZ500R/S1

Field_Strength    = 11.62926421[T] (50
X_Acq_Duration    = 0.18874368[s]
X_Domain          = 31P
X_Freq            = 200.43293989[MHz]
X_Offset          = 0[ppm]
X_Points          = 32768
X_Prescans        = 4
X_Resolution      = 5.29819065[Hz]
X_Sweep           = 173.61111111[kHz]
X_Sweep_Clipped   = 138.88888889[kHz]
Irr_Domain        = Proton
Irr_Freq          = 495.13191398[MHz]
Irr_Offset        = 5[ppm]
Clipped           = FALSE
Scans             = 64
Total_Scans       = 64

Relaxation_Delay  = 1[s]
Recvr_Gain        = 66
Temp_Get          = 20.2[dC]
X_90_Width        = 19.78[us]
X_Acq_Time        = 0.18874368[s]
X_Angle           = 30[deg]
X_Atn             = 9.4[dB]
X_Pulse           = 6.59333333[us]
Irr_Atn_Dec       = 23.948[dB]
Irr_Atn_Dec_Calc = 23.948[dB]
Irr_Atn_Dec_Default_Calc = 23.948[dB]
Irr_Atn_Noise    = 23.948[dB]
Irr_Dec_Bandwidth_Hz = 5.97826087[kHz]
Irr_Dec_Bandwidth_Ppm = 12.07407703[ppm]
Irr_Dec_Freq      = 495.13191398[MHz]
Irr_Dec_Merit_Factor = 2.2
Irr_Decoupling    = TRUE
Irr_Noise         = TRUE
Irr_Noise         = WALTZ

```

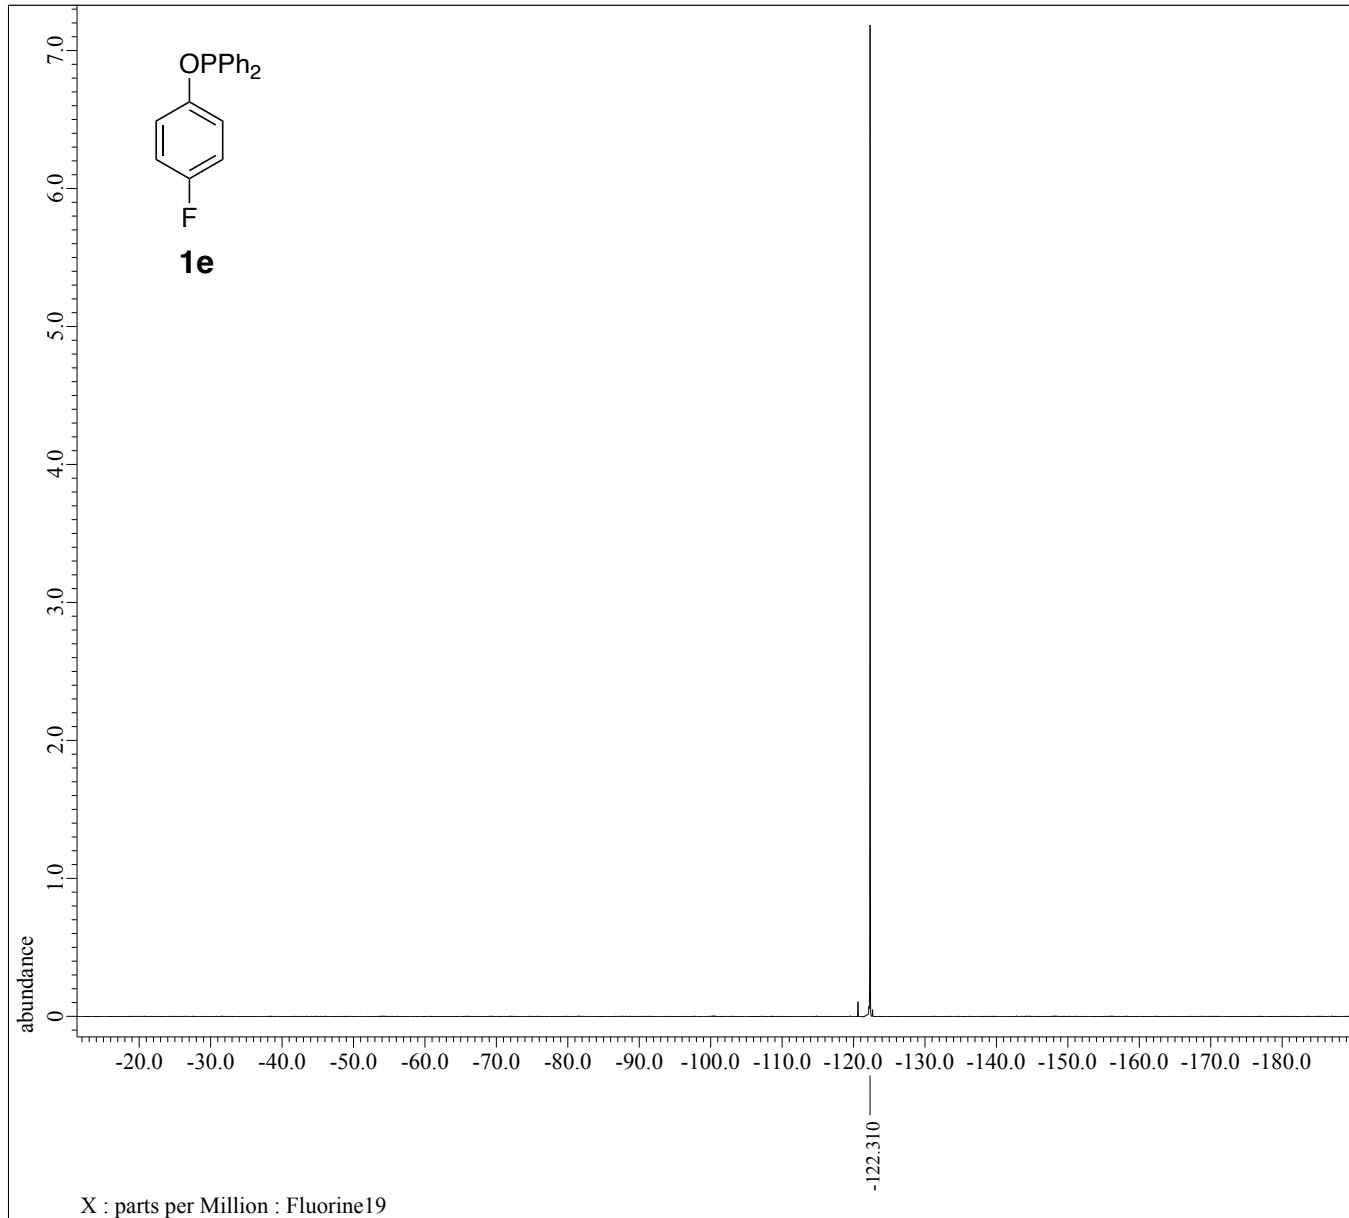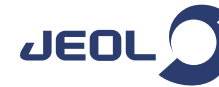

```

---- PROCESSING PARAMETERS ----
sexp( 0.2[Hz], 0.0[s] )
trapezoid( 0[%], 0[%], 80[%], 100[%] )
zerofill( 1, TRUE )
fft( 1, TRUE, TRUE )
machinephase
ppm
phase( 0.75, 0, 50[%] )
base_correct( Akima, 5, 0, FALSE, 3, None, FA
Derived from: YH(S-p-F)_19F-1-1.jdf

```

```

Filename      = YH(S-p-F)_19F-1-2.jdf
Author       = delta
Experiment   = single_pulse.jxp
Sample_Id    = YH(S-p-F)
Solvent      = BENZENE-D6
Actual_Start_Time = 3-APR-2020 20:06:10
Revision_Time   = 7-APR-2020 14:31:23

Comment      = single_pulse
Data_Format  = 1D_REAL
Dim_Size     = 26214
X_Domain     = Fluorine19
Dim_Title    = Fluorine19
Dim_Units    = [ppm]
Dimensions   = X
Spectrometer = JNM-ECZ500R/s1

Field_Strength = 11.62926421[T] (500[M]
X_Acq_Duration = 0.28311552[s]
X_Domain       = 19F
X_Freq         = 465.88941346[MHz]
X_Offset       = -100[ppm]
X_Points       = 32768
X_Prescans     = 1
X_Resolution   = 3.5321271[Hz]
X_Sweep        = 115.74074074[kHz]
X_Sweep_Clipped = 92.59259259[kHz]
Irr_Domain     = Fluorine19
Irr_Freq       = 465.88941346[MHz]
Irr_Offset     = 5[ppm]
Tri_Domain     = Fluorine19
Tri_Freq       = 465.88941346[MHz]
Tri_Offset     = 5[ppm]
Clipped        = FALSE
Scans          = 8
Total_Scans    = 8

Relaxation_Delay = 5[s]
Recvr_Gain       = 56
Temp_Get         = 20.6[dC]
X_90_Width       = 11[us]
X_Acq_Time       = 0.28311552[s]
X_Angle          = 45[deg]
X_Atn            = 3.7[dB]
X_Pulse          = 5.5[us]
Irr_Mode         = Off
Tri_Mode         = Off
Dante_Loop       = 500
Dante_Presat     = FALSE
Decimation_Rate = 0
Initial_Wait     = 1[s]
Phase            = {0, 90, 270, 180, 180
Presat_Time      = 5[s]

```

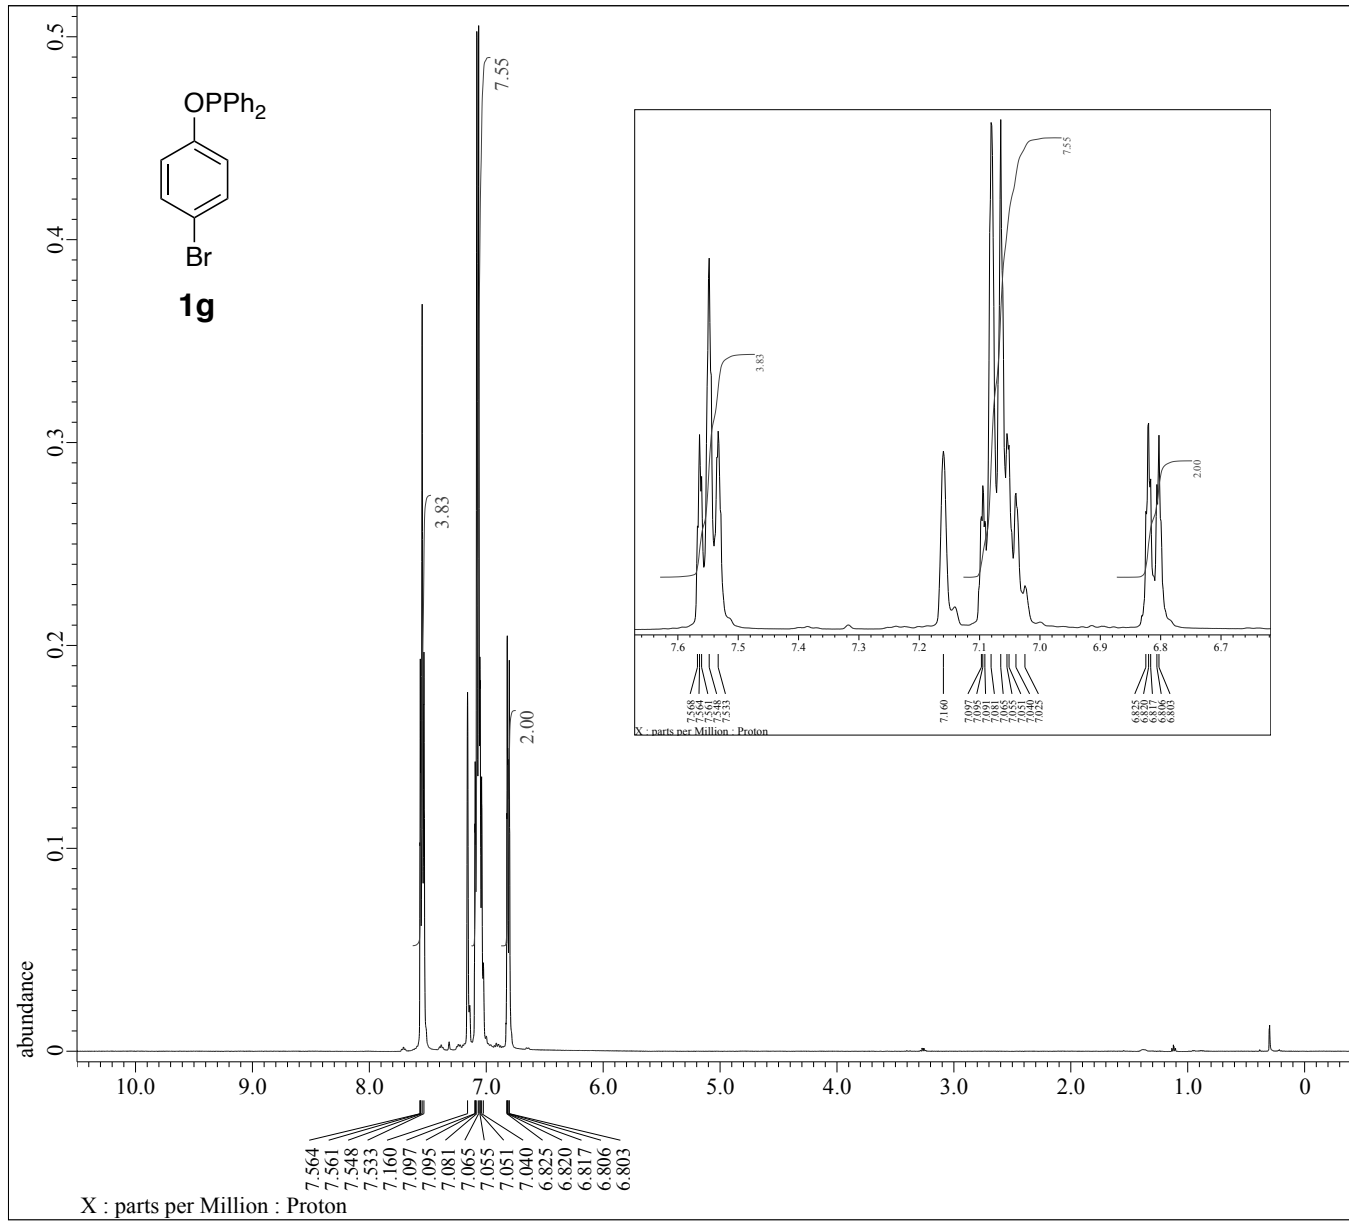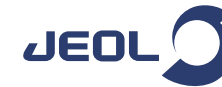

```

---- PROCESSING PARAMETERS ----
sexp( 0.2[Hz], 0.0[s] )
trapezoid( 0[%], 0[%], 80[%], 100[%] )
zerofill( 1, TRUE )
fft( 1, TRUE, TRUE )
machinephase
ppm
phase( 20.03359, 0, 35.06791[%] )
base_correct( Akima, 5, 0, FALSE, 3, None, FA
Derived from: YH-p-Br-2_Proton-1-1.jdf

```

```

Filename      = YH-p-Br-2_Proton-1-10
Author       = delta
Experiment   = proton.jxp
Sample Id    = YH-p-Br-2
Solvent      = BENZENE-D6
Actual_Start_Time = 1-APR-2020 14:25:52
Revision_Time   = 6-APR-2020 22:20:58

```

```

Comment      = single pulse
Data Format   = 1D REAL
Dim Size     = 13107
X_Domain     = Proton
Dim Title    = Proton
Dim Units    = [ppm]
Dimensions   = X
Spectrometer = JNM-ECZ500R/s1

```

```

Field Strength = 11.62926421[T] (500[M
X_Acq_Duration = 1.76422912[s]
X_Domain       = 1H
X_Freq         = 495.13191398[MHz]
X_Offset       = 5[ppm]
X_Points       = 16384
X_Prescans     = 1
X_Resolution   = 0.5668198[Hz]
X_Sweep        = 9.28677563[kHz]
X_Sweep_Clippped = 7.42942051[kHz]
Irr_Domain     = Proton
Irr_Freq       = 495.13191398[MHz]
Irr_Offset     = 5[ppm]
Tri_Domain     = Proton
Tri_Freq       = 495.13191398[MHz]
Tri_Offset     = 5[ppm]
Clipped        = FALSE
Scans          = 8
Total_Scans    = 8

```

```

Relaxation_Delay = 5[s]
Recvr Gain       = 36
Temp_Get         = 21[dC]
X_90_Width       = 9.58[us]
X_Acq_Time       = 1.76422912[s]
X_Angle          = 45[deg]
X_Atn            = 4.3[dB]
X_Pulse          = 4.79[us]
Irr_Mode         = Off
Tri_Mode         = Off
Dante Loop      = 500
Dante_Presat    = FALSE
Decimation_Rate = 0
Initial_Wait     = 1[s]
Phase            = (0, 90, 270, 180, 180
Presat_Time      = 5[s]

```

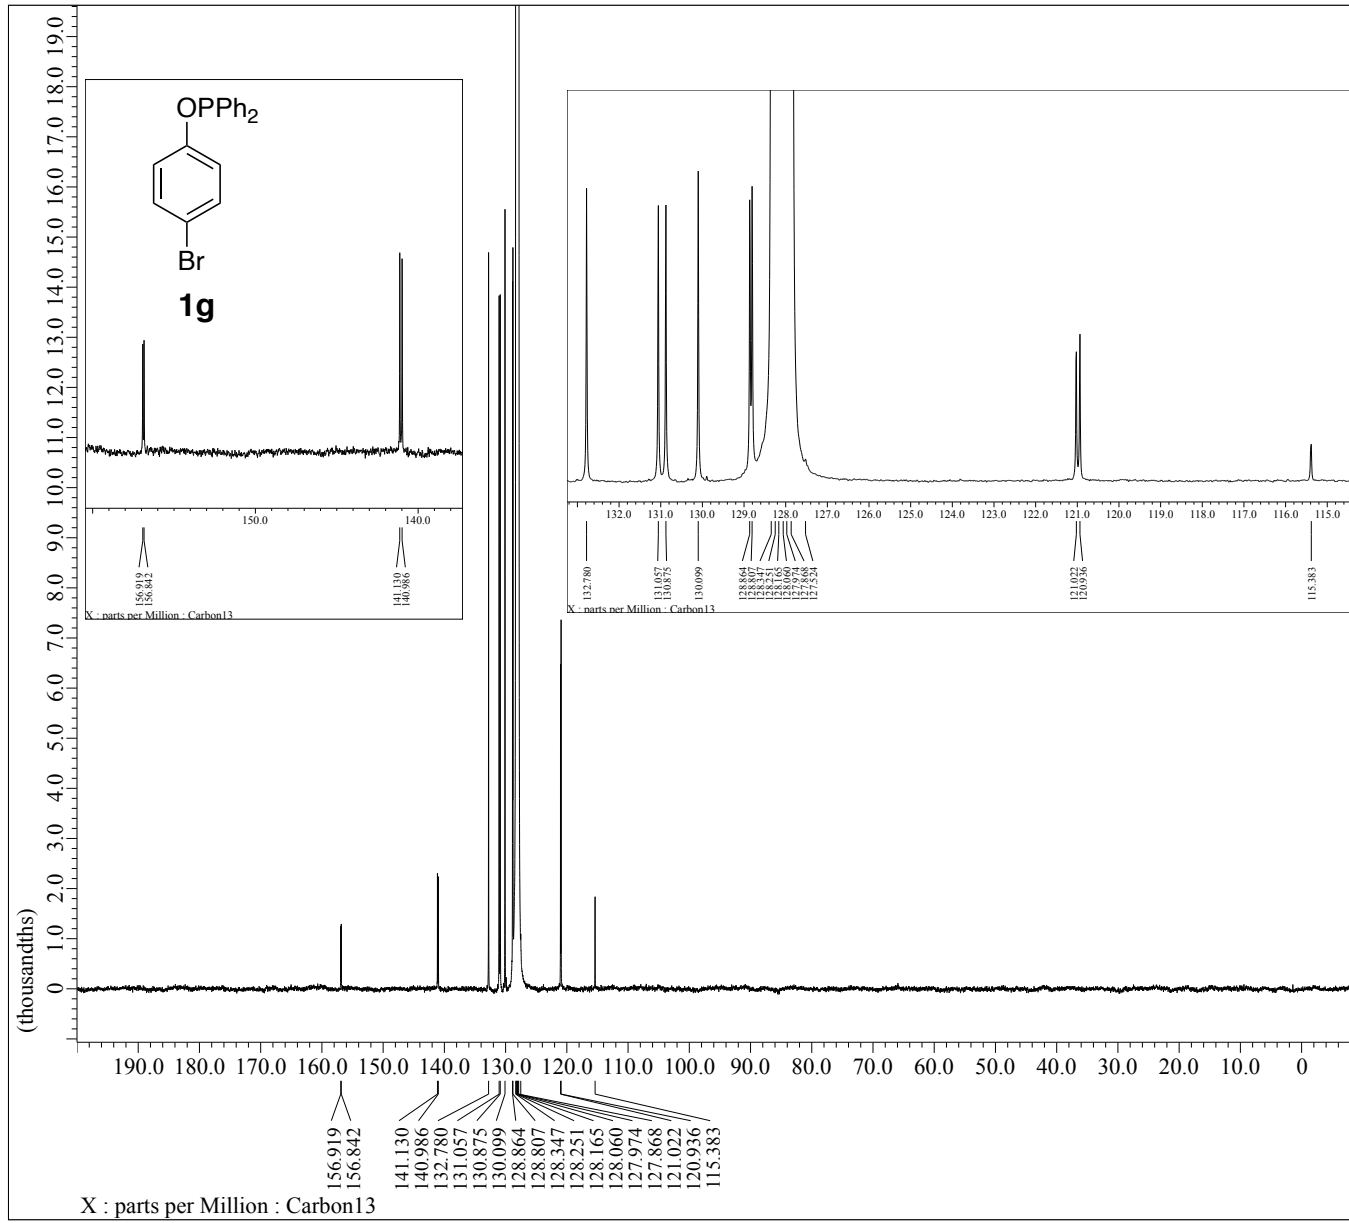

---- PROCESSING PARAMETERS ----  
 sexp( 2.0[Hz], 0.0[s] )  
 trapezoid( 0[%], 0[%], 80[%], 100[%] )  
 zerofill( 1, TRUE )  
 fft( 1, TRUE, TRUE )  
 machinephase  
 ppm  
 phase( -2.25, 0, 50[%] )  
 base\_correct( Akima, 5, 0, FALSE, 3, None, FA  
 Derived from: YH-p-Br-2\_Carbon-1-1.jdf

Filename = YH-p-Br-2\_Carbon-1  
 Author = delta  
 Experiment = carbon.jxp  
 Sample\_Id = YH-p-Br-2  
 Solvent = BENZENE-D6  
 Actual\_Start\_Time = 2-APR-2020 00:07:  
 Revision\_Time = 9-APR-2020 13:44:

Comment = single pulse decou  
 Data Format = 1D REAL  
 Dim\_Size = 26214  
 X\_Domain = Carbon13  
 Dim Title = Carbon13  
 Dim Units = [ppm]  
 Dimensions = X  
 Spectrometer = JNM-ECZ500R/S1

Field Strength = 11.62926421[T] (50  
 X\_Acq\_Duration = 0.8388608[s]  
 X\_Domain = 13C  
 X\_Freq = 124.5010059[MHz]  
 X\_Offset = 100[ppm]  
 X\_Points = 32768  
 X\_Prescans = 4  
 X\_Resolution = 1.1920929[Hz]  
 X\_Sweep = 39.0625[kHz]  
 X\_Sweep\_Clippped = 31.25[kHz]  
 Irr\_Domain = Proton  
 Irr\_Freq = 495.13191398[MHz]  
 Irr\_Offset = 5[ppm]  
 Clipped = FALSE  
 Scans = 5000  
 Total\_Scans = 5000

Relaxation\_Delay = 2[s]  
 Recvr Gain = 56  
 Temp\_Get = 20.9[dC]  
 X\_90\_Width = 9.61[us]  
 X\_Acq\_Time = 0.8388608[s]  
 X\_Angle = 30[deg]  
 X\_Atn = 10[dB]  
 X\_Pulse = 3.20333333[us]  
 Irr\_Atn\_Dec = 23.948[dB]  
 Irr\_Atn\_Dec\_Calc = 23.948[dB]  
 Irr\_Atn\_Dec\_Default\_Calc = 23.948[dB]  
 Irr\_Atn\_Noise = 23.948[dB]  
 Irr\_Dec\_Bandwidth\_Hz = 5.97826087[kHz]  
 Irr\_Dec\_Bandwidth\_Ppm = 12.07407703[ppm]  
 Irr\_Dec\_Freq = 495.13191398[MHz]  
 Irr\_Dec\_Merit\_Factor = 2.2  
 Irr\_Decoupling = TRUE  
 Irr\_Noise = TRUE  
 Irr\_Noise = WALTZ

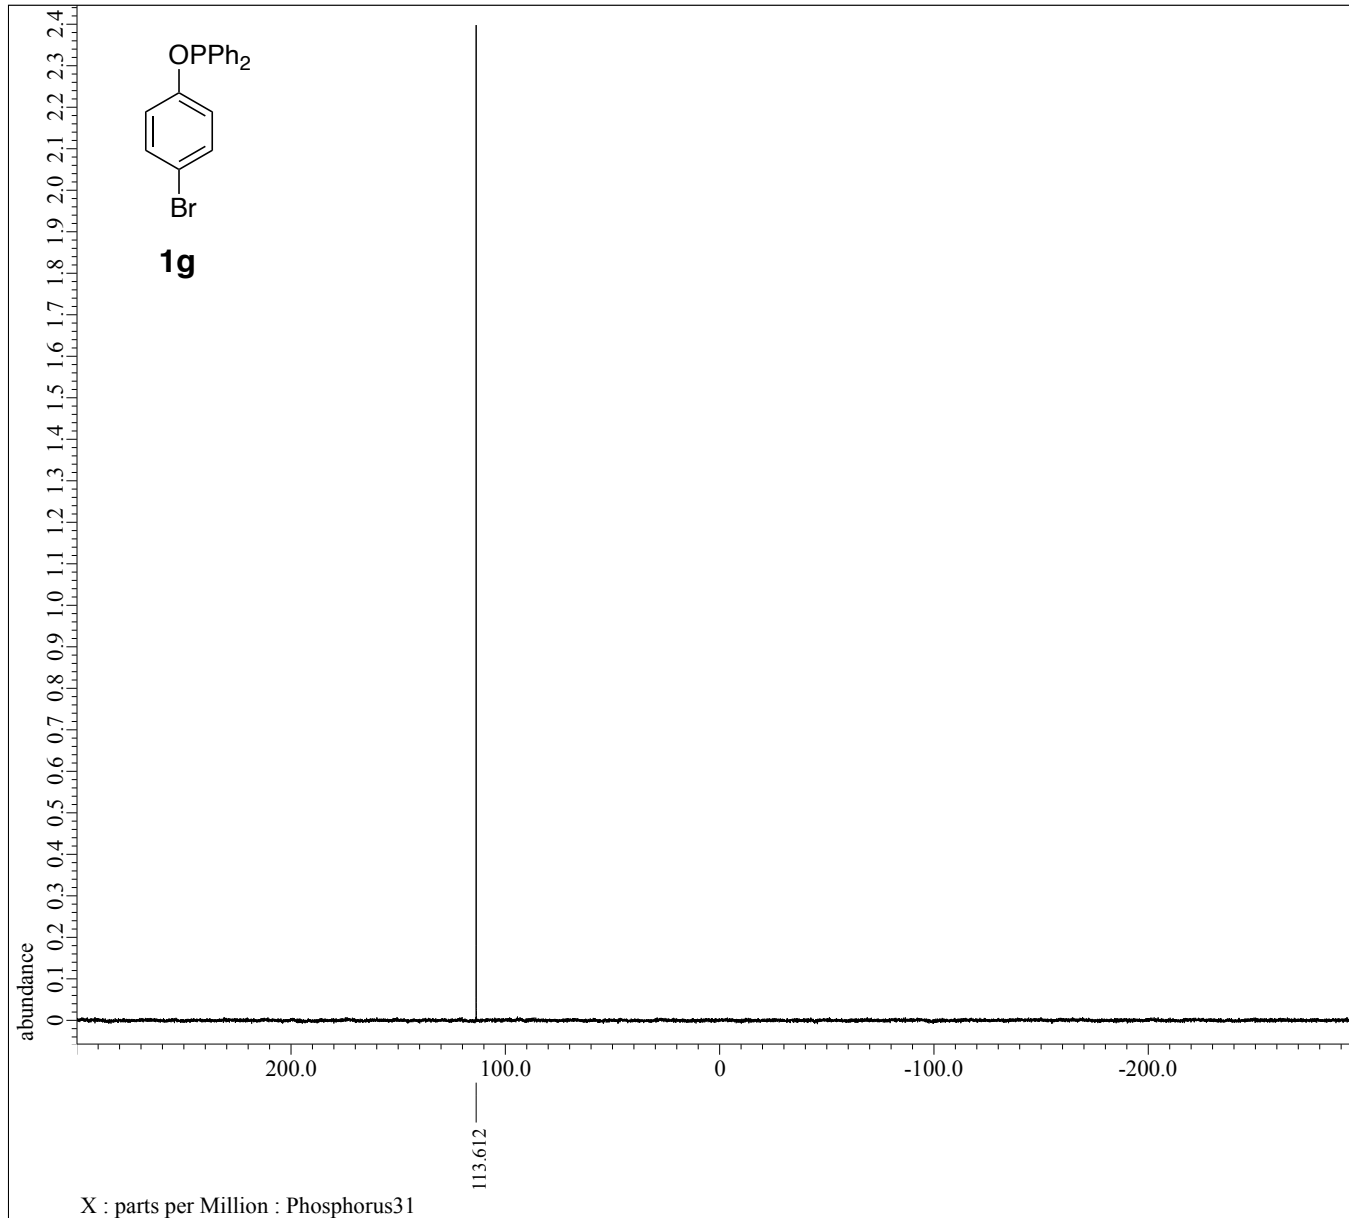

```

---- PROCESSING PARAMETERS ----
sexp( 2.0[Hz], 0.0[s] )
trapezoid( 0[%], 0[%], 80[%], 100[%] )
zerofill( 1, TRUE )
fft( 1, TRUE, TRUE )
machinephase
ppm
phase( -12.5, 0, 50[%] )
base_correct( Akima, 5, 0, FALSE, 3, None, FA
Derived from: YH-p-Br-2_31P_1Hdec-1-1.jdf

```

```

Filename           = YH-p-Br-2_31P_1Hde
Author            = delta
Experiment        = single_pulse_decou
Sample_Id         = YH-p-Br-2
Solvent           = BENZENE-D6
Actual_Start_Time = 1-APR-2020 14:30:
Revision_Time     = 7-APR-2020 12:52:

Comment          = single_pulse decou
Data_Format      = 1D REAL
Dim_Size         = 26214
X_Domain         = Phosphorus31
Dim_Title        = Phosphorus31
Dim_Units        = [ppm]
Dimensions       = X
Spectrometer     = JNM-ECZ500R/S1

Field_Strength   = 11.62926421[T] (50
X_Acq_Duration   = 0.18874368[s]
X_Domain         = 31P
X_Freq           = 200.43293989[MHz]
X_Offset         = 0[ppm]
X_Points         = 32768
X_Prescans       = 4
X_Resolution     = 5.29819065[Hz]
X_Sweep          = 173.61111111[kHz]
X_Sweep_Clipped = 138.88888889[kHz]
Irr_Domain       = Proton
Irr_Freq         = 495.13191398[MHz]
Irr_Offset       = 5[ppm]
Clipped          = FALSE
Scans            = 64
Total_Scans      = 64

Relaxation_Delay = 1[s]
Recvr_Gain       = 66
Temp_Get         = 20.6[dC]
X_90_Width       = 19.78[us]
X_Acq_Time       = 0.18874368[s]
X_Angle          = 30[deg]
X_Atn            = 9.4[dB]
X_Pulse          = 6.59333333[us]
Irr_Atn_Dec      = 23.948[dB]
Irr_Atn_Dec_Calc = 23.948[dB]
Irr_Atn_Dec_Default_Calc = 23.948[dB]
Irr_Atn_Noise   = 23.948[dB]
Irr_Dec_Bandwidth_Hz = 5.97826087[kHz]
Irr_Dec_Bandwidth_Ppm = 12.07407703[ppm]
Irr_Dec_Freq     = 495.13191398[MHz]
Irr_Dec_Merit_Factor = 2.2
Irr_Decoupling  = TRUE
Irr_Noise        = TRUE
Irr_Noise        = WALTZ

```

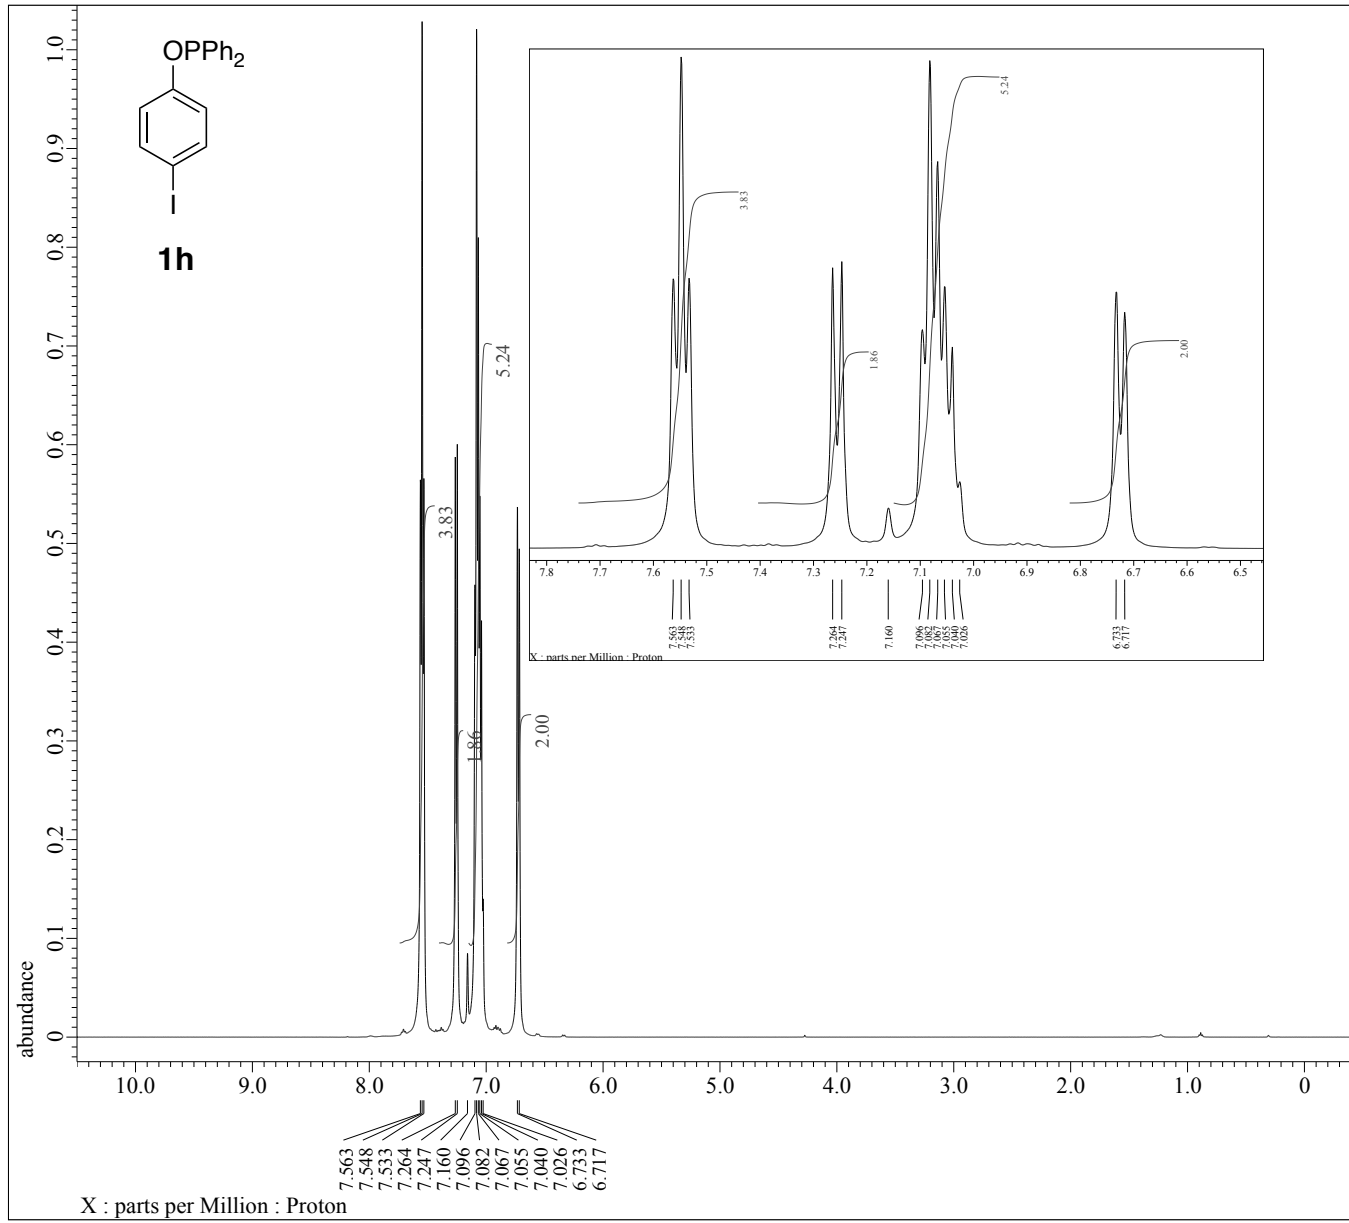

```

---- PROCESSING PARAMETERS ----
sexp( 0.2[Hz], 0.0[s] )
trapezoid( 0[%, 0[%, 80[%, 100[%] )
zerofill( 1, TRUE )
fft( 1, TRUE, TRUE )
machinephase
ppm
base_correct( Akima, 5, 0, FALSE, 3, None, FA
Derived from: YH(S-p-I)_Proton-1-1.jdf

```

```

Filename      = YH(S-p-I)_Proton-1-2.
Author       = delta
Experiment   = proton.jxp
Sample_Id    = YH(S-p-I)
Solvent      = BENZENE-D6
Actual_Start_Time = 3-APR-2020 19:08:47
Revision_Time   = 7-APR-2020 09:56:14

```

```

Comment      = single pulse
Data Format   = 1D REAL
Dim_Size     = 13107
X_Domain     = Proton
Dim_Title    = Proton
Dim_Units    = [ppm]
Dimensions   = X
Spectrometer = JNM-ECZ500R/s1

```

```

Field Strength = 11.62926421[T] (500[M]
X_Acq_Duration = 1.76422912[s]
X_Domain       = 1H
X_Freq        = 495.13191398[MHz]
X_Offset      = 5[ppm]
X_Points      = 16384
X_Prescans    = 1
X_Resolution  = 0.5668198[Hz]
X_Sweep       = 9.28677563[kHz]
X_Sweep_Clip  = 7.42942051[kHz]
Irr_Domain    = Proton
Irr_Freq      = 495.13191398[MHz]
Irr_Offset    = 5[ppm]
Tri_Domain    = Proton
Tri_Freq      = 495.13191398[MHz]
Tri_Offset    = 5[ppm]
Clipped       = FALSE
Scans         = 8
Total_Scans   = 8

```

```

Relaxation_Delay = 5[s]
Recvr_Gain       = 26
Temp_Get         = 19.1[dC]
X_90_Width      = 9.58[us]
X_Acq_Time      = 1.76422912[s]
X_Angle         = 45[deg]
X_Atn           = 4.3[dB]
X_Pulse         = 4.79[us]
Irr_Mode        = Off
Tri_Mode        = Off
Dante_Loop      = 500
Dante_Presat    = FALSE
Decimation_Rate = 0
Initial_Wait    = 1[s]
Phase           = {0, 90, 270, 180, 180}
Presat_Time     = 5[s]

```





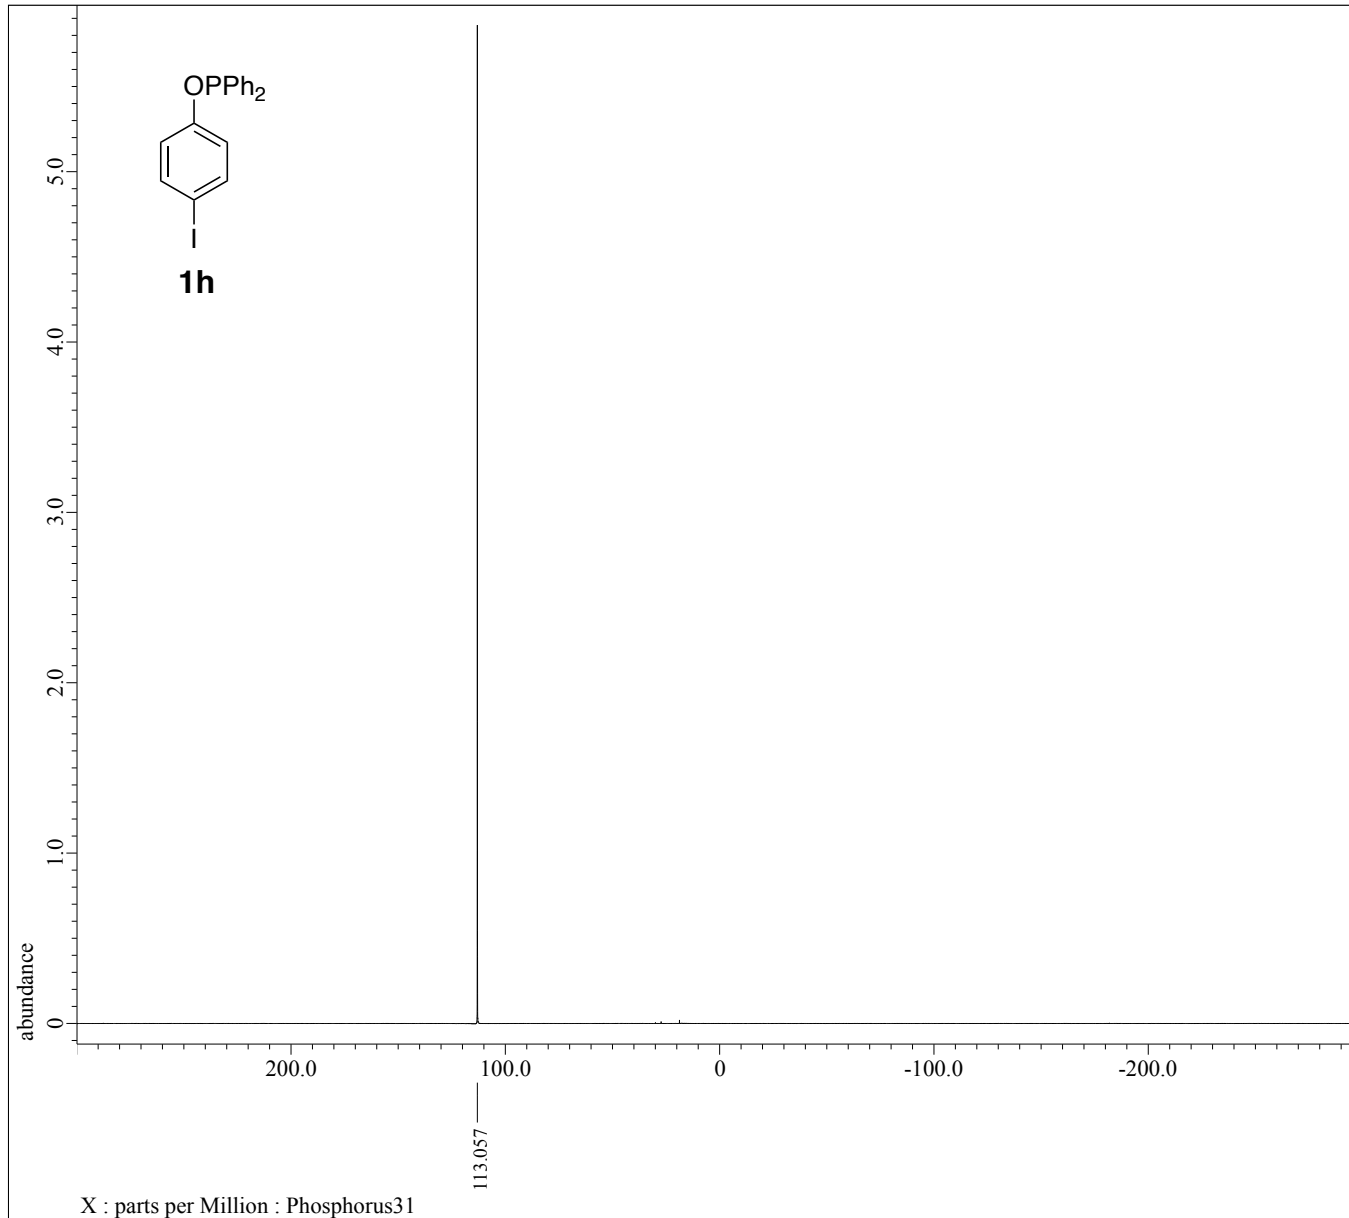

```

---- PROCESSING PARAMETERS ----
sexp( 2.0[Hz], 0.0[s] )
trapezoid( 0[%], 0[%], 80[%], 100[%] )
zerofill( 1, TRUE )
fft( 1, TRUE, TRUE )
machinephase
ppm
phase( 6.75, 0, 33.97551[%] )
base_correct( Akima, 5, 0, FALSE, 3, None, FA
Derived from: YH(S-p-I)_31P_1Hdec-1-1.jdf

```

```

Filename           = YH(S-p-I)_31P_1Hdec
Author             = delta
Experiment         = single_pulse_decou
Sample_Id          = YH(S-p-I)
Solvent            = BENZENE-D6
Actual_Start_Time  = 3-APR-2020 19:12:
Revision_Time      = 7-APR-2020 12:32:

Comment           = single_pulse decou
Data_Format       = 1D REAL
Dim_Size          = 26214
X_Domain          = Phosphorus31
Dim_Title         = Phosphorus31
Dim_Units         = [ppm]
Dimensions        = X
Spectrometer      = JNM-ECZ500R/S1

Field_Strength    = 11.62926421[T] (50
X_Acq_Duration    = 0.18874368[s]
X_Domain          = 31P
X_Freq            = 200.43293989[MHz]
X_Offset          = 0[ppm]
X_Points          = 32768
X_Prescans        = 4
X_Resolution      = 5.29819065[Hz]
X_Sweep           = 173.61111111[kHz]
X_Sweep_Clippped = 138.88888889[kHz]
Irr_Domain        = Proton
Irr_Freq          = 495.13191398[MHz]
Irr_Offset        = 5[ppm]
Clipped           = FALSE
Scans             = 64
Total_Scans       = 64

Relaxation_Delay  = 1[s]
Recvr_Gain        = 56
Temp_Get          = 20[dC]
X_90_Width        = 19.78[us]
X_Acq_Time        = 0.18874368[s]
X_Angle           = 30[deg]
X_Atn             = 9.4[dB]
X_Pulse           = 6.59333333[us]
Irr_Atn_Dec       = 23.948[dB]
Irr_Atn_Dec_Calc  = 23.948[dB]
Irr_Atn_Dec_Default_Calc = 23.948[dB]
Irr_Atn_Noise     = 23.948[dB]
Irr_Dec_Bandwidth_Hz = 5.97826087[kHz]
Irr_Dec_Bandwidth_Ppm = 12.07407703[ppm]
Irr_Dec_Freq      = 495.13191398[MHz]
Irr_Dec_Merit_Factor = 2.2
Irr_Decoupling    = TRUE
Irr_Noise         = TRUE
Irr_Noise         = WALTZ

```

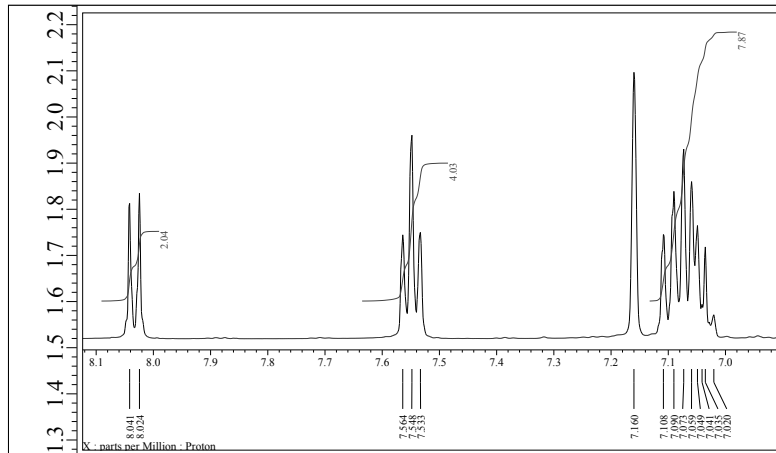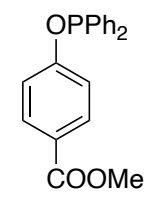

1i

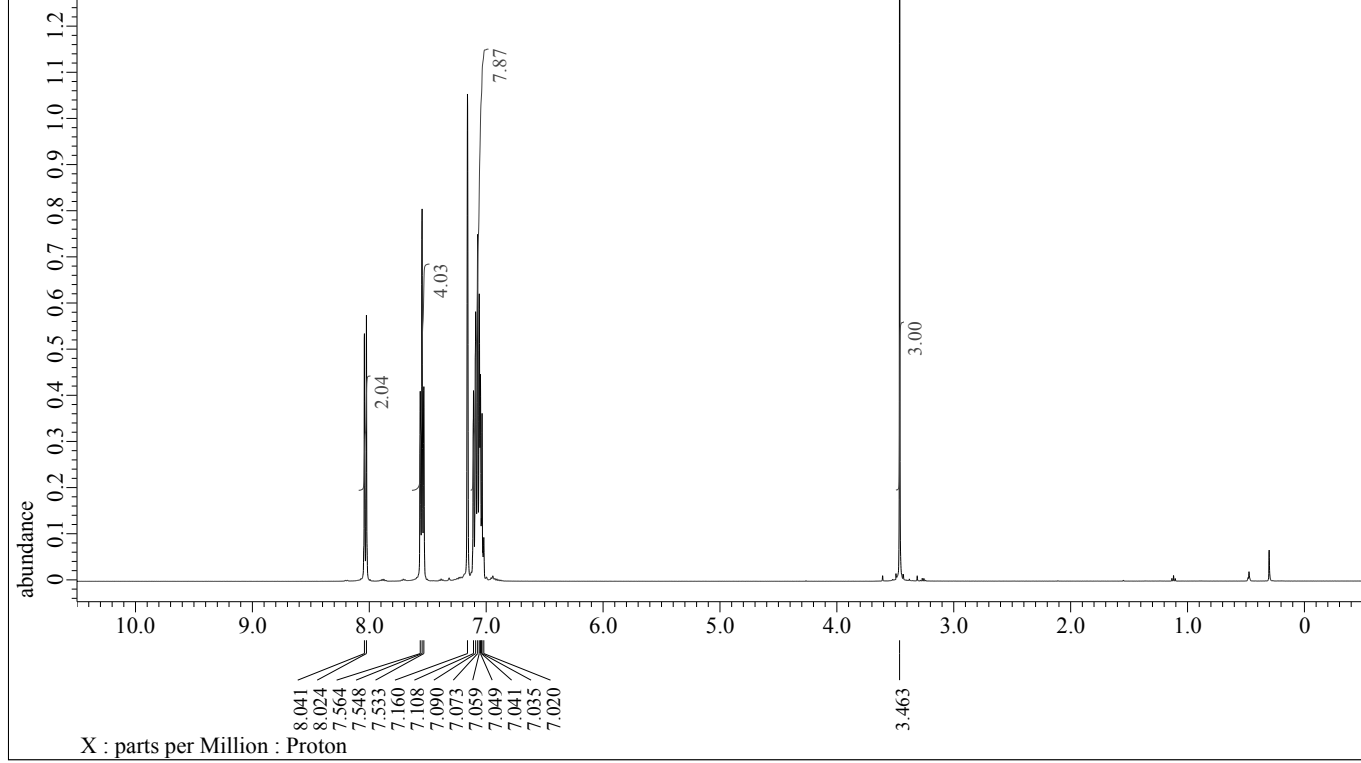

---- PROCESSING PARAMETERS ----  
 sexp( 0.2[Hz], 0.0[s] )  
 trapezoid( 0[%], 0[%], 80[%], 100[%] )  
 zerofill( 1, TRUE )  
 fft( 1, TRUE, TRUE )  
 machinephase  
 ppm  
 reference( 7.09954[ppm], 7.16[ppm] )  
 Derived from: YH(CO2Me)\_Proton-1-1.jdf

Filename = YH(CO2Me)\_Proton-1-2.  
 Author = delta  
 Experiment = proton.jsp  
 Sample\_Id = YH(CO2Me)  
 Solvent = BENZENE-D6  
 Actual\_Start\_Time = 2-APR-2020 19:13:05  
 Revision\_Time = 7-APR-2020 10:13:17  
 Comment = single pulse  
 Data\_Format = 1D COMPLEX  
 Dim\_Size = 13107  
 X\_Domain = Proton  
 Dim\_Title = Proton  
 Dim\_Units = [ppm]  
 Dimensions = X  
 Spectrometer = JNM-ECZ500R/s1  
 Field\_Strength = 11.62926421[T] (500[M  
 X\_Acq\_Duration = 1.76422912[s]  
 X\_Domain = 1H  
 X\_Freq = 495.13191398[MHz]  
 X\_Offset = 5[ppm]  
 X\_Points = 16384  
 X\_Prescans = 1  
 X\_Resolution = 0.5668198 [Hz]  
 X\_Sweep = 9.28677563[kHz]  
 X\_Sweep\_Clippped = 7.42942051[kHz]  
 Irr\_Domain = Proton  
 Irr\_Freq = 495.13191398[MHz]  
 Irr\_Offset = 5[ppm]  
 Tri\_Domain = Proton  
 Tri\_Freq = 495.13191398[MHz]  
 Tri\_Offset = 5[ppm]  
 Clipped = FALSE  
 Scans = 8  
 Total\_Scans = 8  
 Relaxation\_Delay = 5[s]  
 Recvr\_Gain = 36  
 Temp\_Get = 20[dC]  
 X\_90\_Width = 9.58[us]  
 X\_Acq\_Time = 1.76422912[s]  
 X\_Angle = 45[deg]  
 X\_Atn = 4.3[dB]  
 X\_Pulse = 4.79[us]  
 Irr\_Mode = Off  
 Tri\_Mode = Off  
 Dante\_Loop = 500  
 Dante\_Presat = FALSE  
 Decimation\_Rate = 0  
 Initial\_Wait = 1[s]  
 Phase = {0, 90, 270, 180, 180  
 Presat\_Time = 5[s]

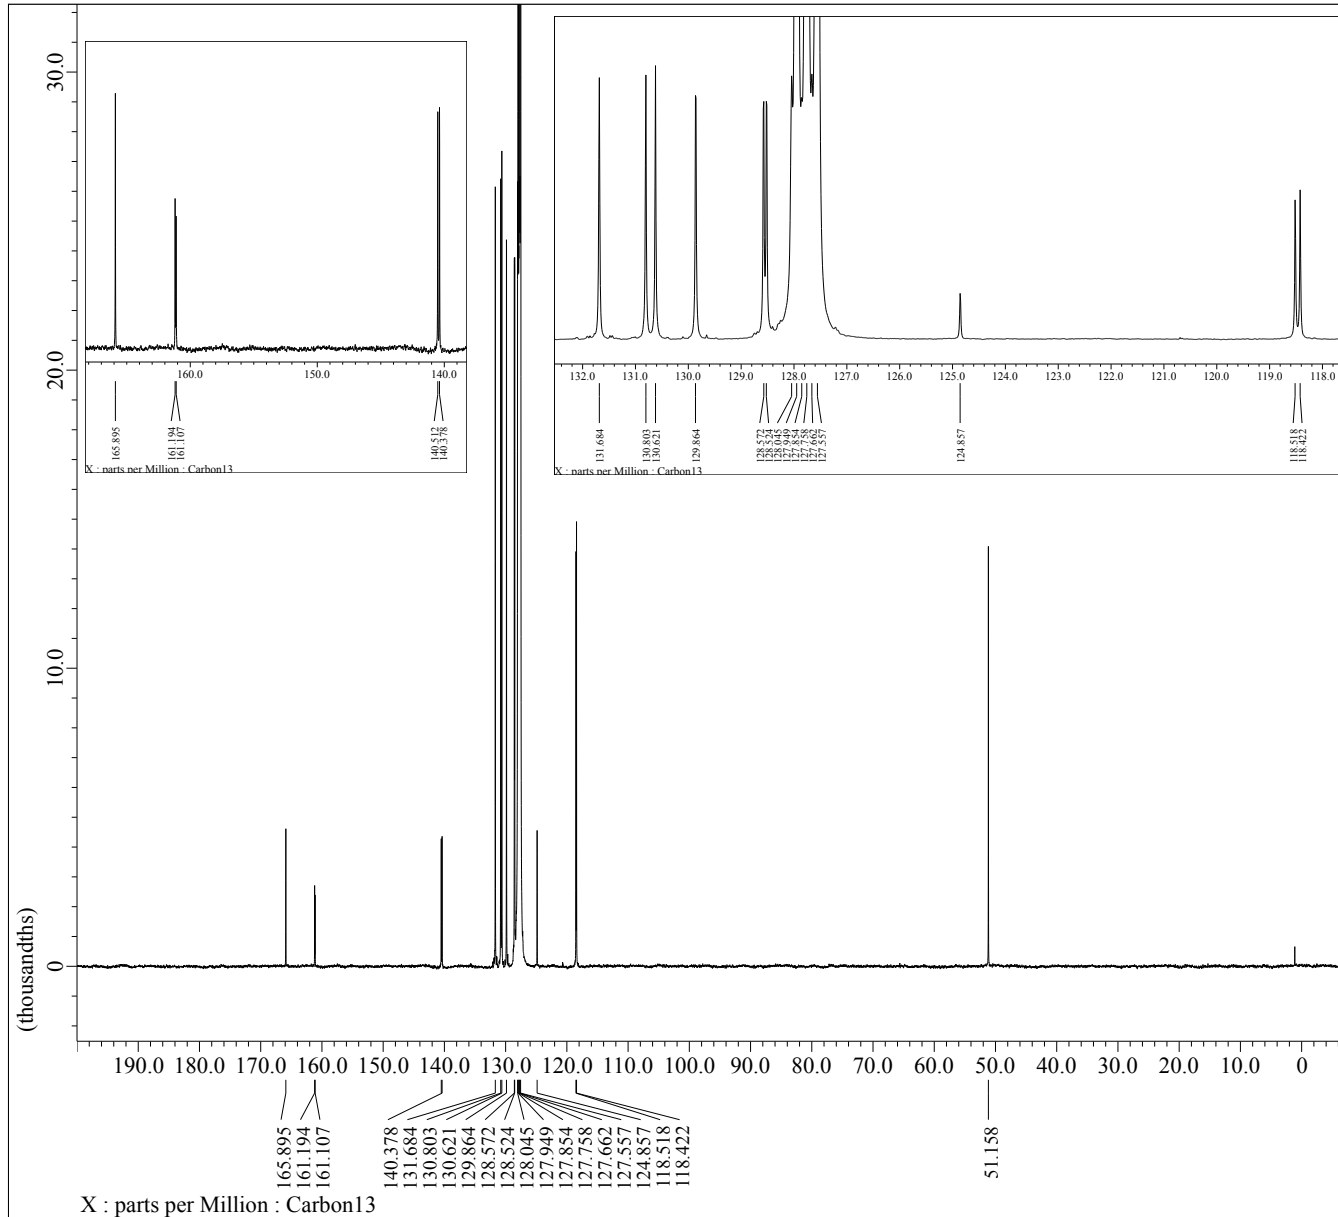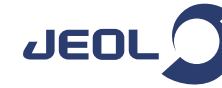

---- PROCESSING PARAMETERS ----

```

sexp( 2.0[Hz], 0.0[s] )
trapezoid( 0[%], 0[%], 80[%], 100[%] )
zerofill( 1, TRUE )
fft( 1, TRUE, TRUE )
machinephase
ppm
phase( -1.75, 0, 50[%] )
base_correct( Akima, 5, 0, FALSE, 3, None, FA
Derived from: YH(CO2Me)_Carbon-1-1.jdf

```

```

Filename      = YH(CO2Me)_Carbon-1
Author        = delta
Experiment    = carbon.jxp
Sample Id     = YH(CO2Me)
Solvent       = BENZENE-D6
Actual_Start_Time = 3-APR-2020 03:30:
Revision_Time = 9-APR-2020 13:42:

```

```

Comment       = single pulse decou
Data Format    = 1D REAL
Dim Size      = 26214
X Domain      = Carbon13
Dim Title     = Carbon13
Dim Units     = [ppm]
Dimensions    = X
Spectrometer  = JNM-ECZ500R/S1

```

```

Field Strength = 11.62926421[T] (50
X Acq Duration = 0.8388608[s]
X Domain       = 13C
X Freq         = 124.5010059[MHz]
X Offset       = 100[ppm]
X Points       = 32768
X Prescans     = 4
X Resolution   = 1.1920929[Hz]
X Sweep        = 39.0625[kHz]
X Sweep Clipped = 31.25[kHz]
Irr Domain     = Proton
Irr Freq       = 495.13191398[MHz]
Irr Offset     = 5[ppm]
Clipped        = FALSE
Scans          = 5000
Total_Scans    = 5000

```

```

Relaxation_Delay = 2[s]
Recvr Gain       = 56
Temp_Get         = 20.7[dC]
X 90 Width      = 9.61[us]
X Acq Time       = 0.8388608[s]
X Angle         = 30[deg]
X Atn           = 10[dB]
X Pulse         = 3.20333333[us]
Irr Atn Dec     = 23.948[dB]
Irr Atn Dec Calc = 23.948[dB]
Irr Atn Dec Default_Calc = 23.948[dB]
Irr Atn Noe     = 23.948[dB]
Irr Dec Bandwidth_Hz = 5.97826087[kHz]
Irr Dec Bandwidth_Ppm = 12.07407703[ppm]
Irr Dec Freq    = 495.13191398[MHz]
Irr Dec Merit Factor = 2.2
Irr Decoupling  = TRUE
Irr Noe         = TRUE
Irr Noise       = WALTZ

```

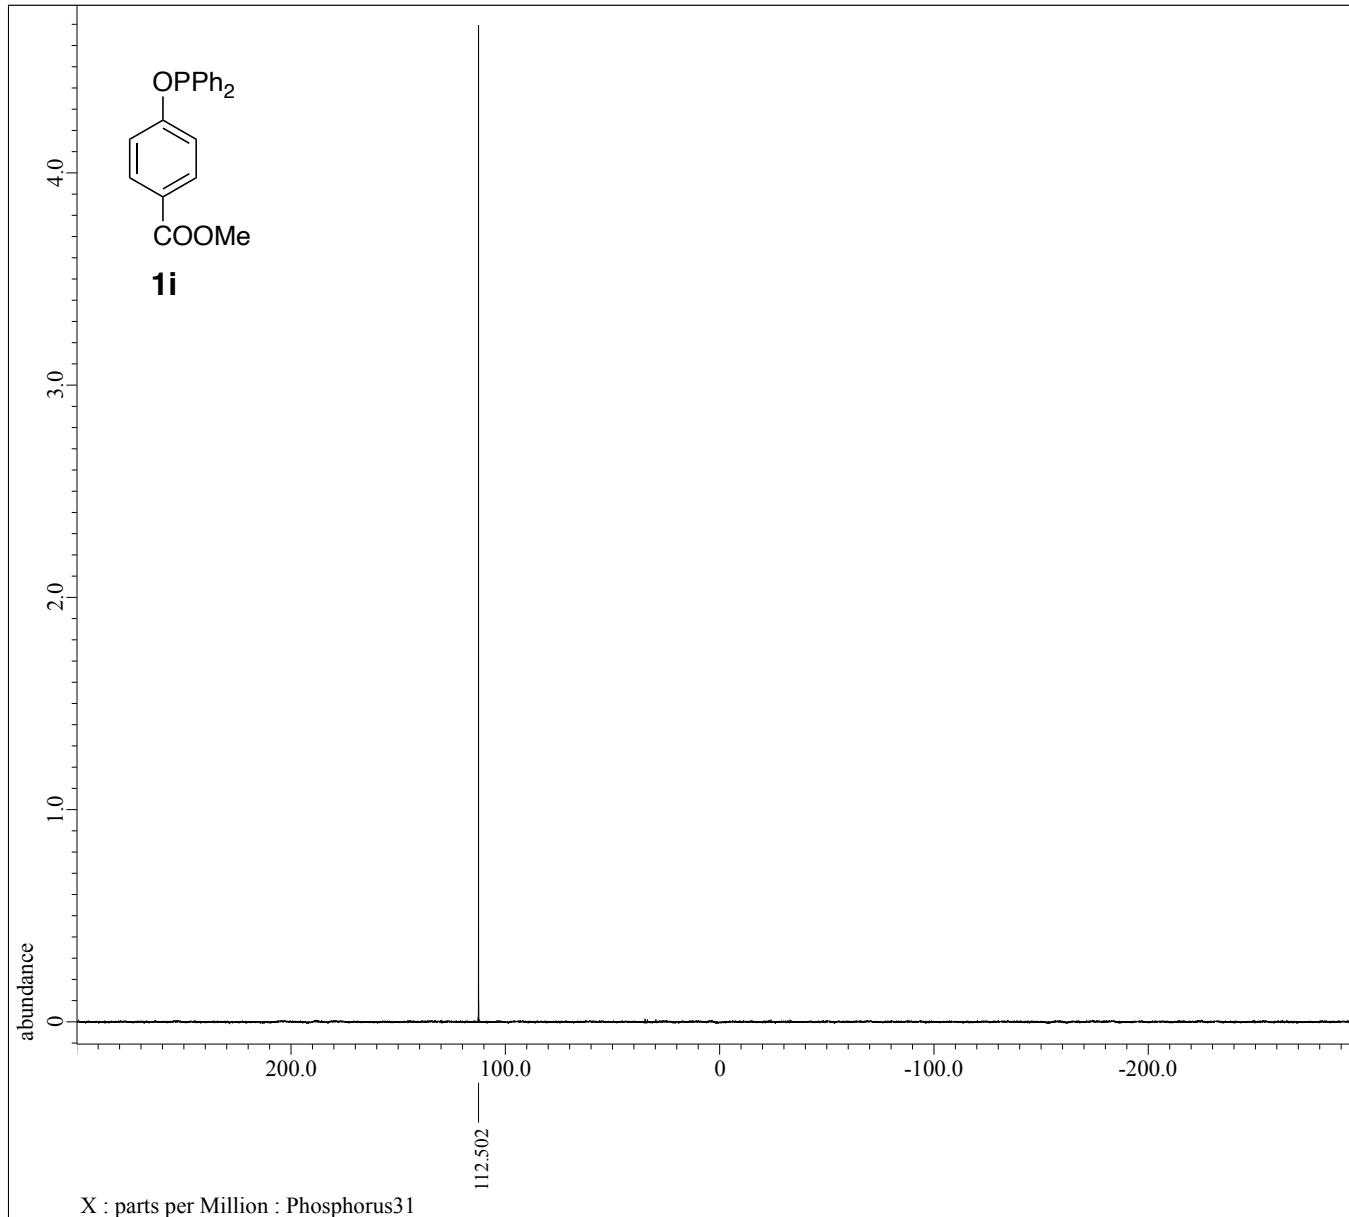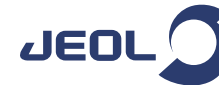

```

---- PROCESSING PARAMETERS ----
sexp( 2.0[Hz], 0.0[s] )
trapezoid( 0[%], 0[%], 80[%], 100[%] )
zerofill( 1, TRUE )
fft( 1, TRUE, TRUE )
machinephase
ppm
phase( -30, 0, 50[%] )
base_correct( Akima, 5, 0, FALSE, 3, None, FA
Derived from: YH(CO2Me)_31P_1Hdec-1-1.jdf

```

```

Filename           = YH(CO2Me)_31P_1Hdec
Author             = delta
Experiment         = single_pulse_decou
Sample_Id          = YH(CO2Me)
Solvent            = BENZENE-D6
Actual_Start_Time  = 2-APR-2020 19:16:
Revision_Time      = 7-APR-2020 12:50:

Comment           = single_pulse decou
Data_Format       = 1D REAL
Dim_Size          = 26214
X_Domain          = Phosphorus31
Dim_Title         = Phosphorus31
Dim_Units         = [ppm]
Dimensions        = X
Spectrometer      = JNM-ECZ500R/S1

Field_Strength    = 11.62926421[T] (50
X_Acq_Duration    = 0.18874368[s]
X_Domain          = 31P
X_Freq            = 200.43293989[MHz]
X_Offset          = 0[ppm]
X_Points          = 32768
X_Prescans        = 4
X_Resolution      = 5.29819065[Hz]
X_Sweep           = 173.61111111[kHz]
X_Sweep_Clippped = 138.88888889[kHz]
Irr_Domain        = Proton
Irr_Freq          = 495.13191398[MHz]
Irr_Offset        = 5[ppm]
Clipped           = FALSE
Scans              = 64
Total_Scans       = 64

Relaxation_Delay  = 1[s]
Recvr_Gain        = 66
Temp_Get          = 20[dC]
X_90_Width        = 19.78[us]
X_Acq_Time        = 0.18874368[s]
X_Angle           = 30[deg]
X_Atn             = 9.4[dB]
X_Pulse           = 6.59333333[us]
Irr_Atn_Dec       = 23.948[dB]
Irr_Atn_Dec_Calc = 23.948[dB]
Irr_Atn_Dec_Default_Calc = 23.948[dB]
Irr_Atn_Noise    = 23.948[dB]
Irr_Dec_Bandwidth_Hz = 5.97826087[kHz]
Irr_Dec_Bandwidth_Ppm = 12.07407703[ppm]
Irr_Dec_Freq     = 495.13191398[MHz]
Irr_Dec_Merit_Factor = 2.2
Irr_Decoupling   = TRUE
Irr_Noise        = TRUE
Irr_Noise        = WALTZ

```

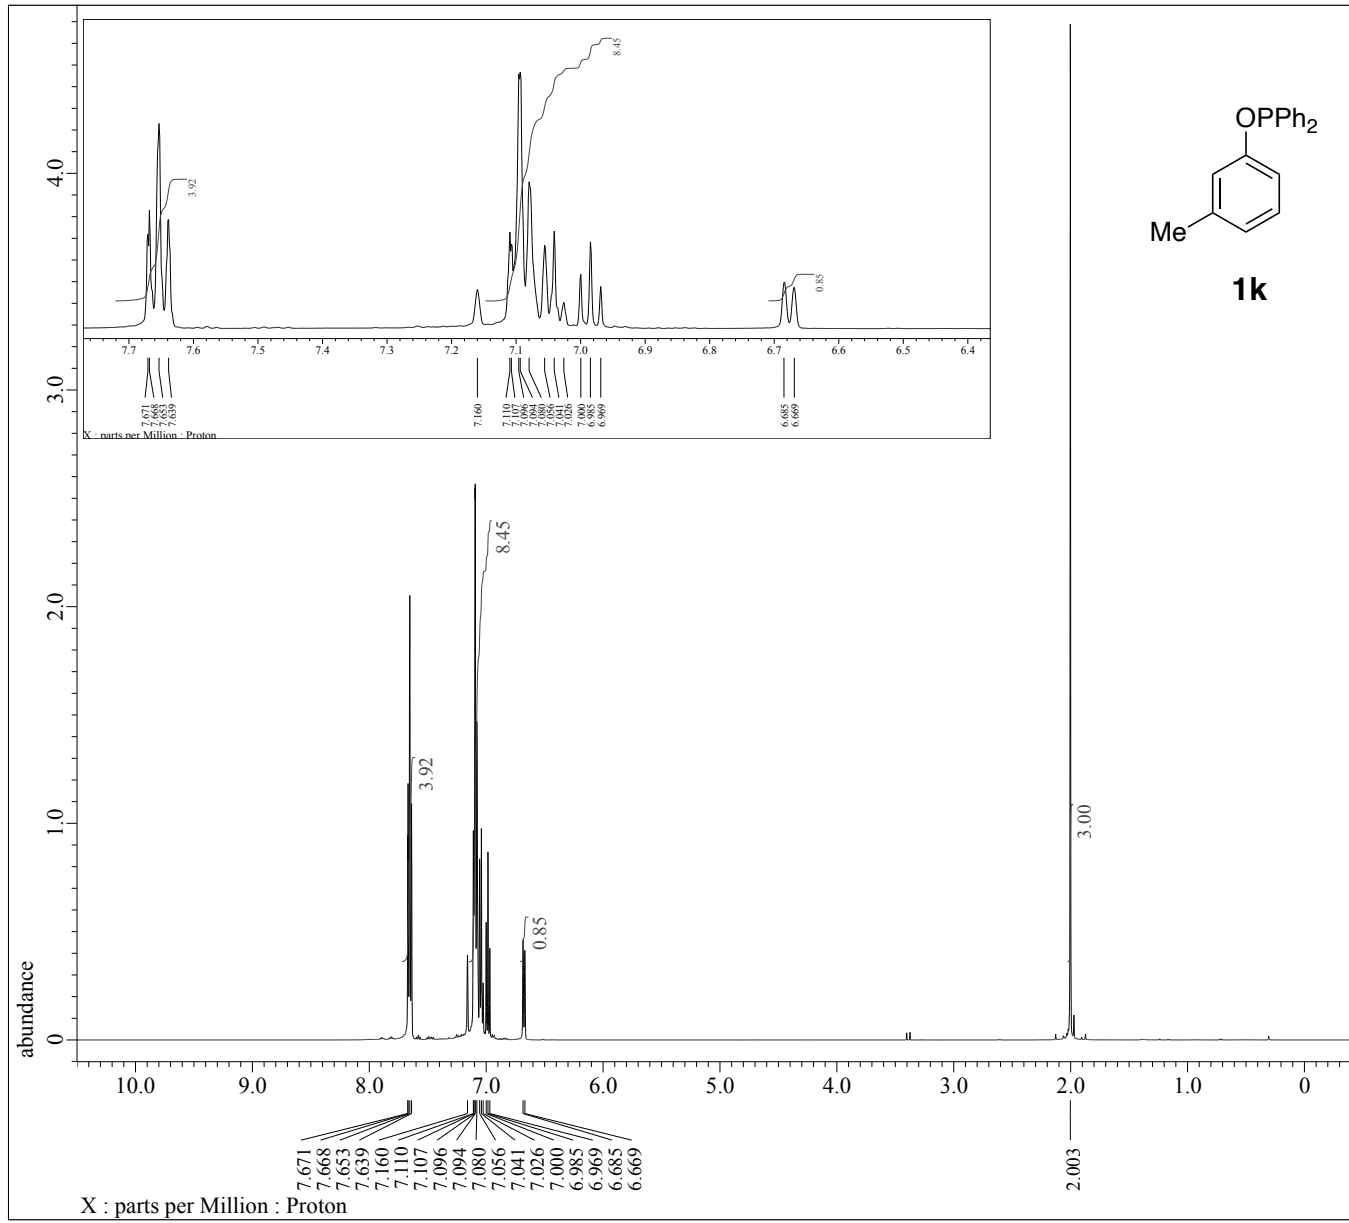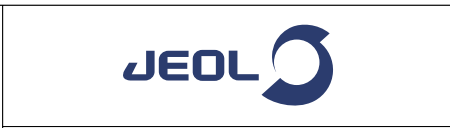

---- PROCESSING PARAMETERS ----  
 sexp( 0.2[Hz], 0.0[s] )  
 trapezoid( 0[%], 0[%], 80[%], 100[%] )  
 zerofill( 1, TRUE )  
 fft( 1, TRUE, TRUE )  
 machinephase  
 ppm  
 base\_correct( Akima, 5, 0, FALSE, 3, None, FA  
 Derived from: YH(S-m-Me)\_Proton-1-1.jdf

Filename = YH(S-m-Me)\_Proton-1-4  
 Author = delta  
 Experiment = proton.jxp  
 Sample\_Id = YH(S-m-Me)  
 Solvent = BENZENE-D6  
 Actual\_Start\_Time = 2-APR-2020 04:26:51  
 Revision\_Time = 7-APR-2020 12:28:56

Comment = single pulse  
 Data Format = 1D REAL  
 Dim\_Size = 13107  
 X\_Domain = Proton  
 Dim\_Title = Proton  
 Dim\_Units = [ppm]  
 Dimensions = X  
 Spectrometer = JNM-ECZ500R/s1

Field Strength = 11.62926421[T] (500[M]  
 X\_Acq\_Duration = 1.76422912[s]  
 X\_Domain = 1H  
 X\_Freq = 495.13191398[MHz]  
 X\_Offset = 5[ppm]  
 X\_Points = 16384  
 X\_Prescans = 1  
 X\_Resolution = 0.5668198 [Hz]  
 X\_Sweep = 9.28677563 [kHz]  
 X\_Sweep\_Clippped = 7.42942051 [kHz]  
 Irr\_Domain = Proton  
 Irr\_Freq = 495.13191398 [MHz]  
 Irr\_Offset = 5 [ppm]  
 Tri\_Domain = Proton  
 Tri\_Freq = 495.13191398 [MHz]  
 Tri\_Offset = 5 [ppm]  
 Clipped = FALSE  
 Scans = 8  
 Total\_Scans = 8

Relaxation\_Delay = 5[s]  
 Recvr\_Gain = 36  
 Temp\_Get = 20.8 [dC]  
 X\_90\_Width = 9.58 [us]  
 X\_Acq\_Time = 1.76422912 [s]  
 X\_Angle = 45 [deg]  
 X\_Atn = 4.3 [dB]  
 X\_Pulse = 4.79 [us]  
 Irr\_Mode = Off  
 Tri\_Mode = Off  
 Dante\_Loop = 500  
 Dante\_Presat = FALSE  
 Decimation\_Rate = 0  
 Initial\_Wait = 1 [s]  
 Phase = {0, 90, 270, 180, 180  
 Presat\_Time = 5 [s]

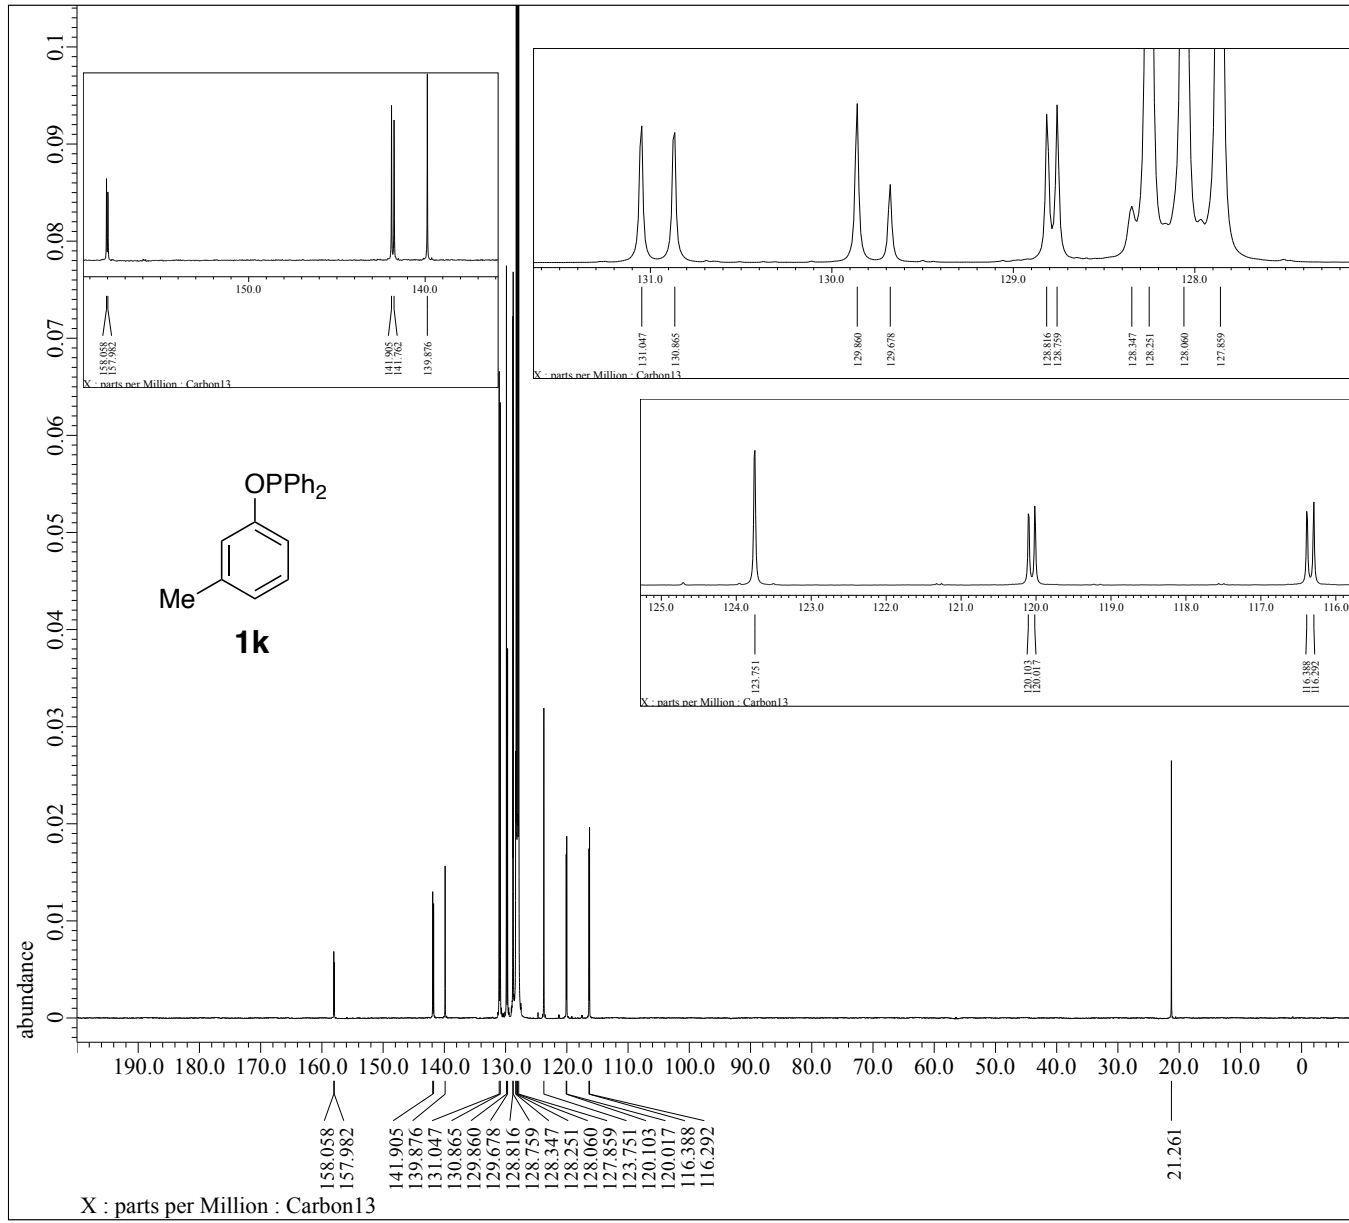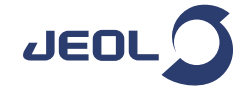

```

---- PROCESSING PARAMETERS ----
sexp( 2.0[Hz], 0.0[s] )
trapezoid( 0[%], 0[%], 80[%], 100[%] )
zerofill( 1, TRUE )
fft( 1, TRUE, TRUE )
machinephase
ppm
phase( -1.25, 0, 50[%] )
base_correct( Akima, 5, 0, FALSE, 3, None, FA
reference( 127.75783[ppm], 128.06[ppm] )

Derived from: YH(S-m-Me)_Carbon-1-1.jdf

```

```

Filename      = YH(S-m-Me)_Carbon-
Author        = delta
Experiment    = carbon.jxp
Sample_Id     = YH(S-m-Me)
Solvent       = BENZENE-D6
Actual_Start_Time = 3-APR-2020 07:33:
Revision_Time  = 9-APR-2020 13:49:

Comment       = single pulse decou
Data Format    = 1D REAL
Dim_Size      = 26214
X_Domain      = Carbon13
Dim Title     = Carbon13
Dim Units     = [ppm]
Dimensions    = X
Spectrometer  = JNM-ECZ500R/S1

Field Strength = 11.62926421[T] (50
X_Acq_Duration = 0.8388608[s]
X_Domain       = 13C
X_Freq         = 124.5010059[MHz]
X_Offset       = 100[ppm]
X_Points       = 32768
X_Prescans     = 4
X_Resolution   = 1.1920929[Hz]
X_Sweep        = 39.0625[kHz]
X_Sweep_Clippped = 31.25[kHz]
Irr_Domain     = Proton
Irr_Freq       = 495.13191398[MHz]
Irr_Offset     = 5[ppm]
Clipped        = FALSE
Scans          = 5000
Total_Scans    = 5000

Relaxation_Delay = 2[s]
Recvr Gain       = 56
Temp_Get         = 20.4[dC]
X_90_Width      = 9.61[us]
X_Acq_Time      = 0.8388608[s]
X_Angle         = 30[deg]
X_Atn           = 10[dB]
X_Pulse         = 3.20333333[us]
Irr_Atn_Dec     = 23.948[dB]
Irr_Atn_Dec_Calc = 23.948[dB]
Irr_Atn_Dec_Default_Calc = 23.948[dB]
Irr_Atn_Noise   = 23.948[dB]
Irr_Dec_Bandwidth_Hz = 5.97826087[kHz]
Irr_Dec_Bandwidth_Ppm = 12.07407703[ppm]
Irr_Dec_Freq    = 495.13191398[MHz]
Irr_Dec_Merit_Factor = 2.2
Irr_Decoupling  = TRUE
Irr_Noise       = TRUE
Irr_Noise       = WALTZ

```

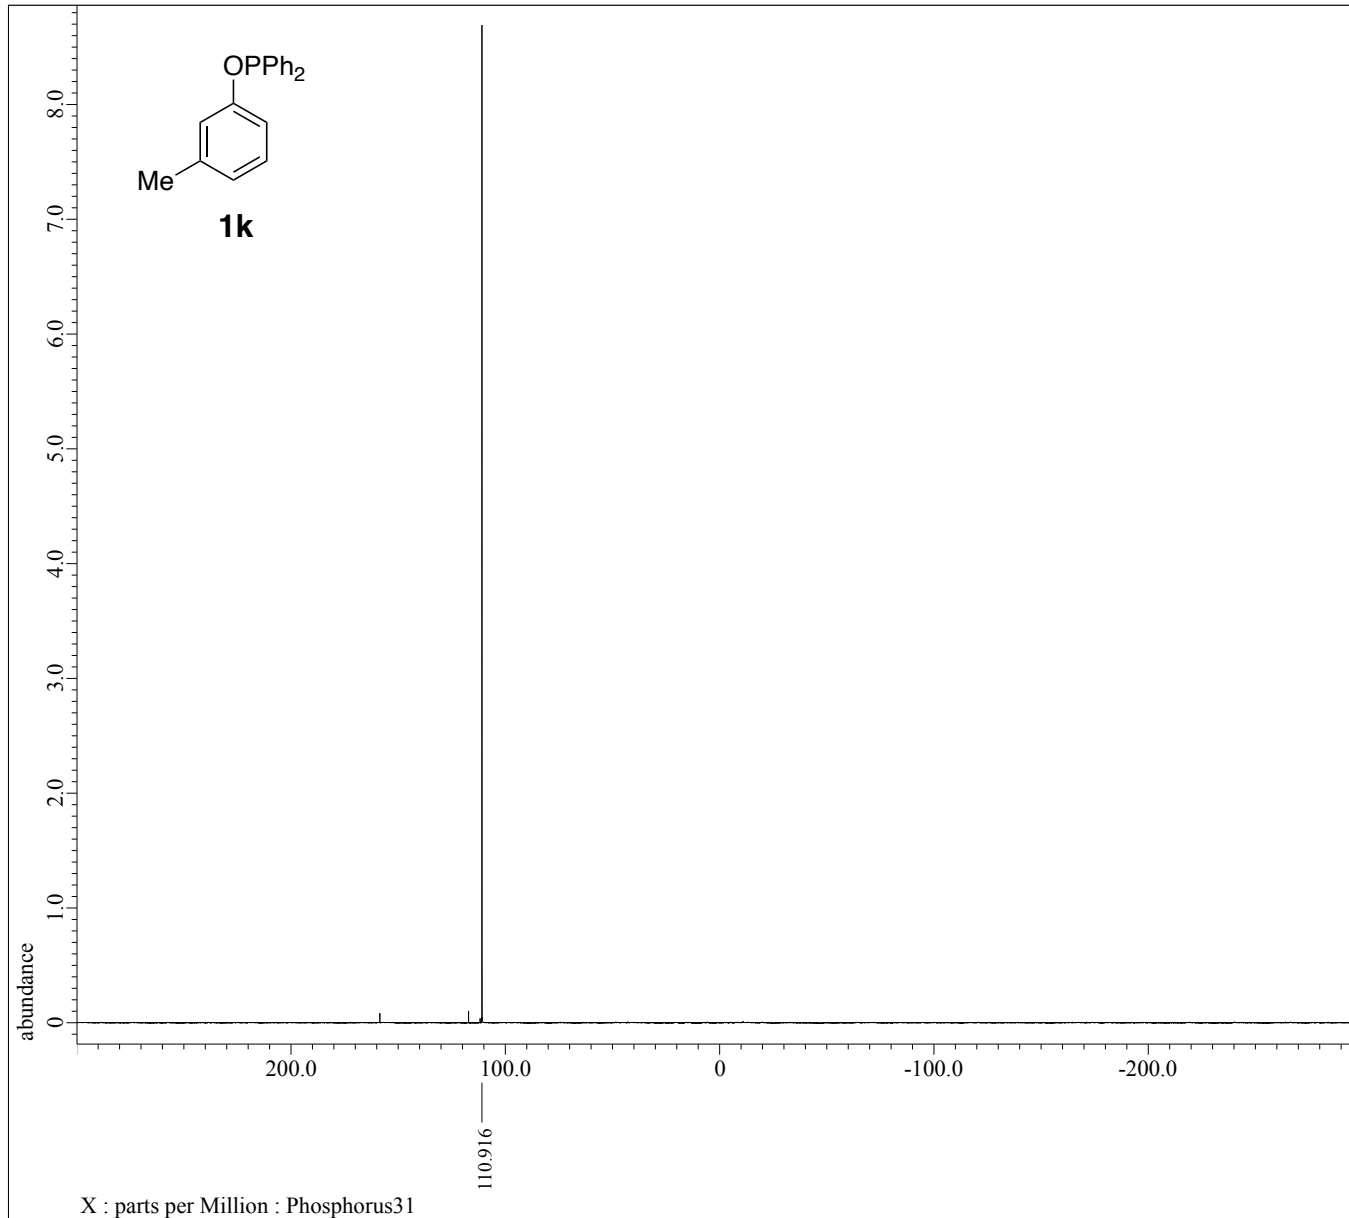

```

---- PROCESSING PARAMETERS ----
sexp( 2.0[Hz], 0.0[s] )
trapezoid( 0[%], 0[%], 80[%], 100[%] )
zerofill( 1, TRUE )
fft( 1, TRUE, TRUE )
machinephase
ppm
phase( 4, 0, 50[%] )
base_correct( Akima, 5, 0, FALSE, 3, None, FA
Derived from: YH(S-m-Me)_31P_1Hdec-1-1.jdf

```

```

Filename           = YH(S-m-Me)_31P_1Hd
Author             = delta
Experiment         = single_pulse_decou
Sample_Id          = YH(S-m-Me)
Solvent            = BENZENE-D6
Actual_Start_Time  = 2-APR-2020 11:47:
Revision_Time      = 7-APR-2020 12:44:

Comment           = single_pulse decou
Data_Format       = 1D REAL
Dim_Size          = 26214
X_Domain          = Phosphorus31
Dim_Title         = Phosphorus31
Dim_Units         = [ppm]
Dimensions        = X
Spectrometer      = JNM-ECZ500R/S1

Field_Strength    = 11.62926421[T] (50
X_Acq_Duration    = 0.18874368[s]
X_Domain          = 31P
X_Freq            = 200.43293989[MHz]
X_Offset          = 0[ppm]
X_Points          = 32768
X_Prescans        = 4
X_Resolution      = 5.29819065[Hz]
X_Sweep           = 173.61111111[kHz]
X_Sweep_Clipped   = 138.88888889[kHz]
Irr_Domain        = Proton
Irr_Freq          = 495.13191398[MHz]
Irr_Offset        = 5[ppm]
Clipped           = FALSE
Scans             = 64
Total_Scans       = 64

Relaxation_Delay  = 1[s]
Recvr_Gain        = 66
Temp_Get          = 20.3[dC]
X_90_Width        = 19.78[us]
X_Acq_Time        = 0.18874368[s]
X_Angle           = 30[deg]
X_Atn             = 9.4[dB]
X_Pulse           = 6.59333333[us]
Irr_Atn_Dec       = 23.948[dB]
Irr_Atn_Dec_Calc  = 23.948[dB]
Irr_Atn_Dec_Default_Calc = 23.948[dB]
Irr_Atn_Noise     = 23.948[dB]
Irr_Dec_Bandwidth_Hz = 5.97826087[kHz]
Irr_Dec_Bandwidth_Ppm = 12.07407703[ppm]
Irr_Dec_Freq      = 495.13191398[MHz]
Irr_Dec_Merit_Factor = 2.2
Irr_Decoupling    = TRUE
Irr_Noise         = TRUE
Irr_Noise         = WALTZ

```



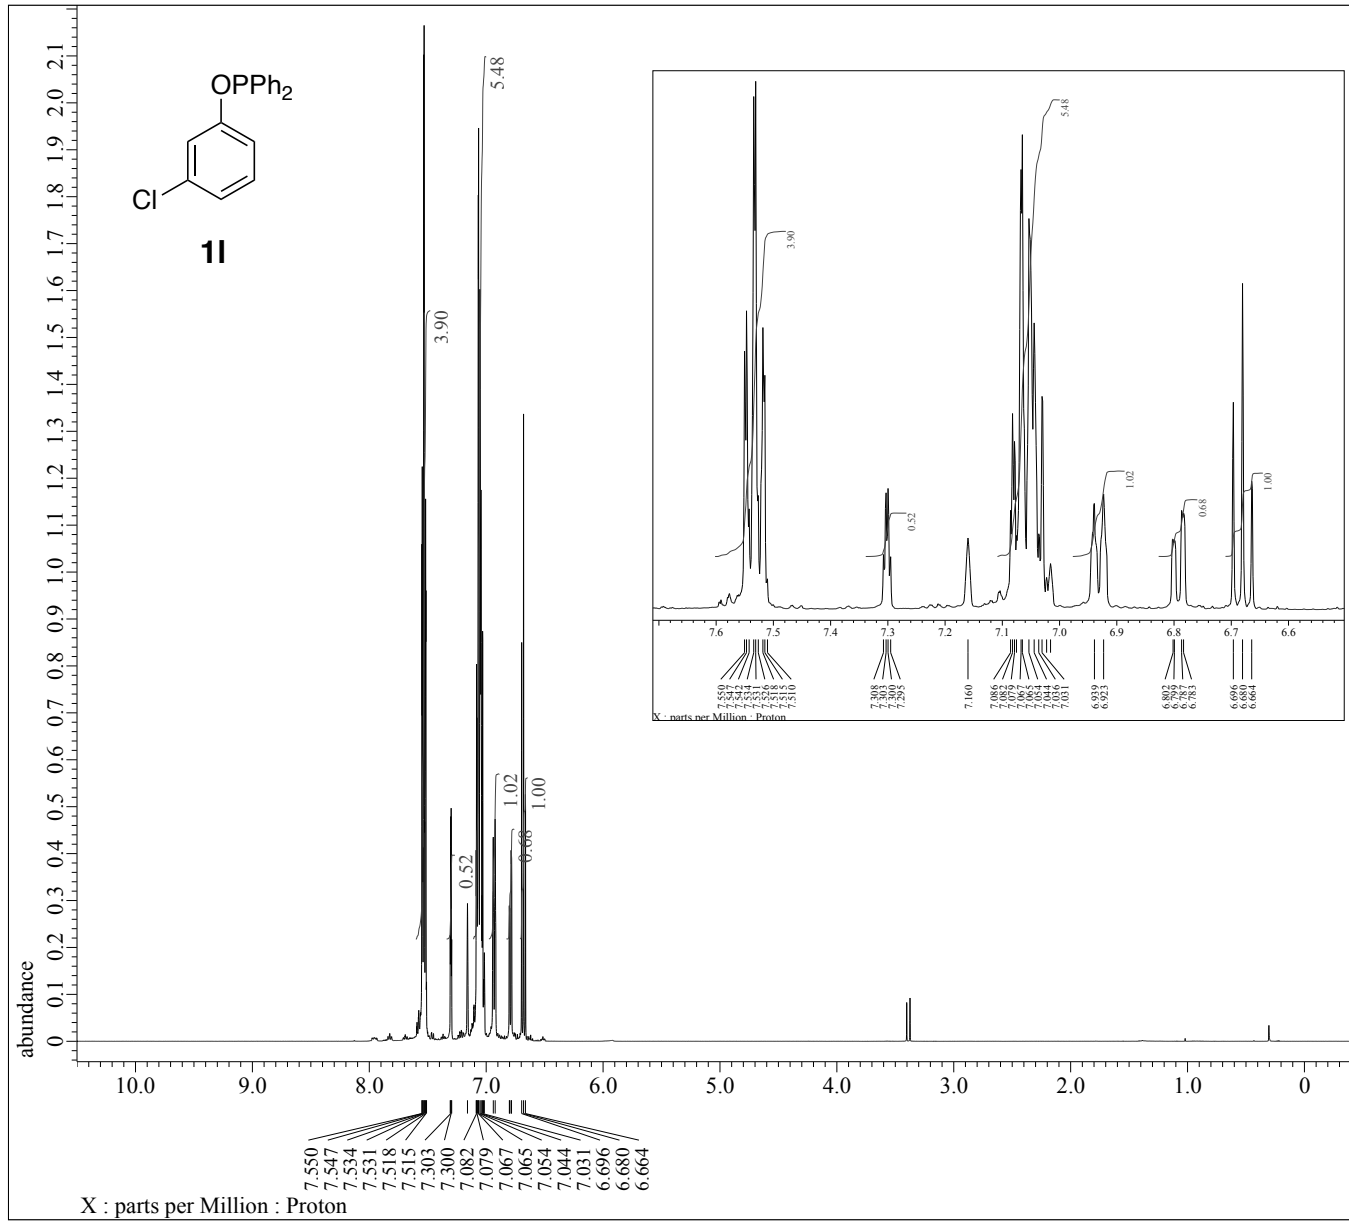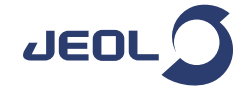

```

---- PROCESSING PARAMETERS ----
sexp( 0.2[Hz], 0.0[s] )
trapezoid( 0[%], 0[%], 80[%], 100[%] )
zerofill( 1, TRUE )
fft( 1, TRUE, TRUE )
machinephase
ppm
reference( 7.0961[ppm], 7.16[ppm] )
base_correct( Akima, 5, 0, FALSE, 3, None, FA
Derived from: YH(S-m-Cl)_Proton-1-1.jdf

```

```

Filename      = YH(S-m-Cl)_Proton-1-2
Author       = delta
Experiment   = proton.jxp
Sample_Id    = YH(S-m-Cl)
Solvent      = BENZENE-D6
Actual_Start_Time = 2-APR-2020 04:12:54
Revision_Time   = 7-APR-2020 10:10:10

```

```

Comment      = single pulse
Data Format   = 1D REAL
Dim_Size     = 13107
X_Domain     = Proton
Dim_Title    = Proton
Dim_Units    = [ppm]
Dimensions   = X
Spectrometer = JNM-ECZ500R/s1

```

```

Field Strength = 11.62926421[T] (500[M]
X_Acq_Duration = 1.76422912[s]
X_Domain       = 1H
X_Freq         = 495.13191398[MHz]
X_Offset       = 5[ppm]
X_Points       = 16384
X_Prescans     = 1
X_Resolution   = 0.5668198[Hz]
X_Sweep        = 9.28677563[kHz]
X_Sweep_Clippped = 7.42942051[kHz]
Irr_Domain     = Proton
Irr_Freq       = 495.13191398[MHz]
Irr_Offset     = 5[ppm]
Tri_Domain     = Proton
Tri_Freq       = 495.13191398[MHz]
Tri_Offset     = 5[ppm]
Clipped        = FALSE
Scans          = 8
Total_Scans    = 8

```

```

Relaxation_Delay = 5[s]
Recvr_Gain       = 36
Temp_Get         = 21.3[dC]
X_90_Width       = 9.58[us]
X_Acq_Time       = 1.76422912[s]
X_Angle          = 45[deg]
X_Atn           = 4.3[dB]
X_Pulse         = 4.79[us]
Irr_Mode        = Off
Tri_Mode        = Off
Dante_Loop      = FALSE
Dante_Presat    = FALSE
Decimation_Rate = 0
Initial_Wait    = 1[s]
Phase           = {0, 90, 270, 180, 180}
Presat_Time     = 5[s]

```

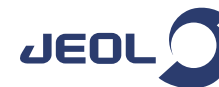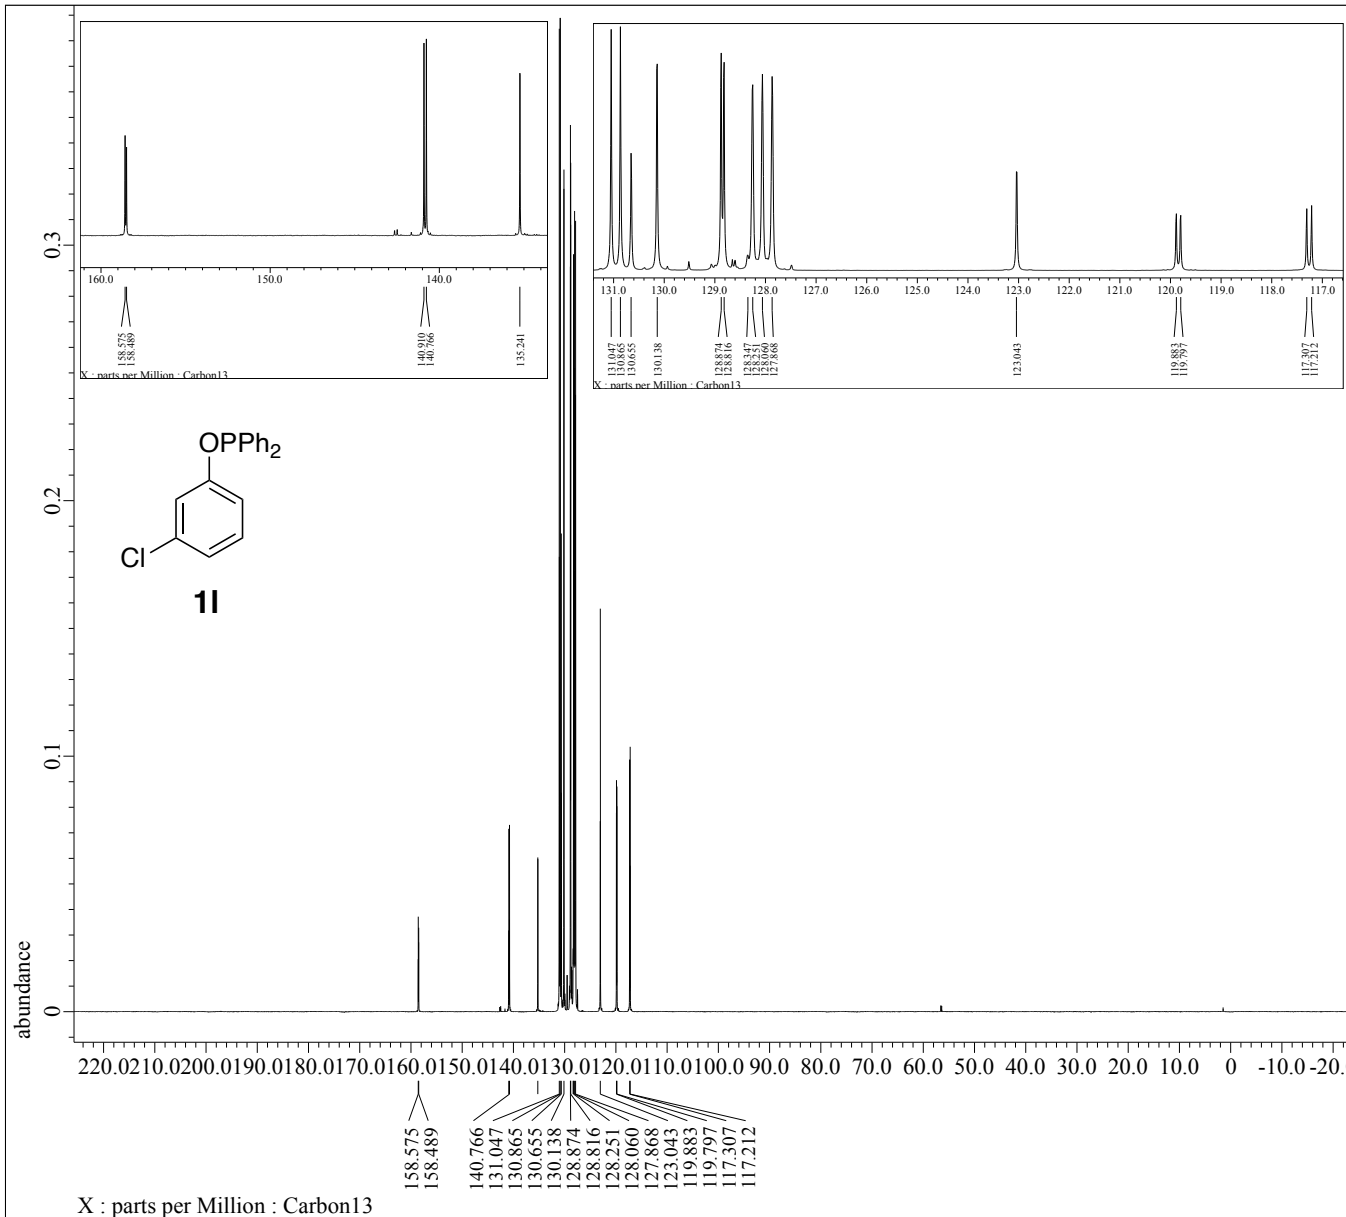

---- PROCESSING PARAMETERS ----  
sexp( 2.0[Hz], 0.0[s] )  
trapezoid( 0[%], 0[%], 80[%], 100[%] )  
zerofill( 1, TRUE )  
fft( 1, TRUE, TRUE )  
machinephase  
ppm  
phase( 2.72465, 0, 50[%] )  
base\_correct( Akima, 5, 0, FALSE, 3, None, FA  
Derived from: YH(m-Cl-2)\_Carbon-1-1.jdf

Filename = YH(m-Cl-2)\_Carbon-  
Author = delta  
Experiment = carbon.jxp  
Sample\_Id = YH(m-Cl-2)  
Solvent = BENZENE-D6  
Actual\_Start\_Time = 7-APR-2020 01:00:  
Revision\_Time = 9-APR-2020 13:40:  
Comment = single pulse decou  
Data\_Format = 1D REAL  
Dim\_Size = 26214  
X\_Domain = Carbon13  
Dim\_Title = Carbon13  
Dim\_Units = [ppm]  
Dimensions = X  
Spectrometer = JNM-ECZ500R/S1  
Field\_Strength = 11.62926421[T] (50  
X\_Acq\_Duration = 0.8388608[s]  
X\_Domain = 13C  
X\_Freq = 124.5010059[MHz]  
X\_Offset = 100[ppm]  
X\_Points = 32768  
X\_Prescans = 4  
X\_Resolution = 1.1920929[Hz]  
X\_Sweep = 39.0625[kHz]  
X\_Sweep\_Clippped = 31.25[kHz]  
Irr\_Domain = Proton  
Irr\_Freq = 495.13191398[MHz]  
Irr\_Offset = 5[ppm]  
Clipped = FALSE  
Scans = 1024  
Total\_Scans = 1024  
Relaxation\_Delay = 2[s]  
Recvr\_Gain = 56  
Temp\_Get = 21.2[dC]  
X\_90\_Width = 9.61[us]  
X\_Acq\_Time = 0.8388608[s]  
X\_Angle = 30[deg]  
X\_Atn = 10[dB]  
X\_Pulse = 3.20333333[us]  
Irr\_Atn\_Dec = 23.948[dB]  
Irr\_Atn\_Dec\_Calc = 23.948[dB]  
Irr\_Atn\_Dec\_Default\_Calc = 23.948[dB]  
Irr\_Atn\_No = 23.948[dB]  
Irr\_Dec\_Bandwidth\_Hz = 5.97826087[kHz]  
Irr\_Dec\_Bandwidth\_Ppm = 12.07407703[ppm]  
Irr\_Dec\_Freq = 495.13191398[MHz]  
Irr\_Dec\_Merit\_Factor = 2.2  
Irr\_Decoupling = TRUE  
Irr\_No = TRUE  
Irr\_Noise = WALTZ

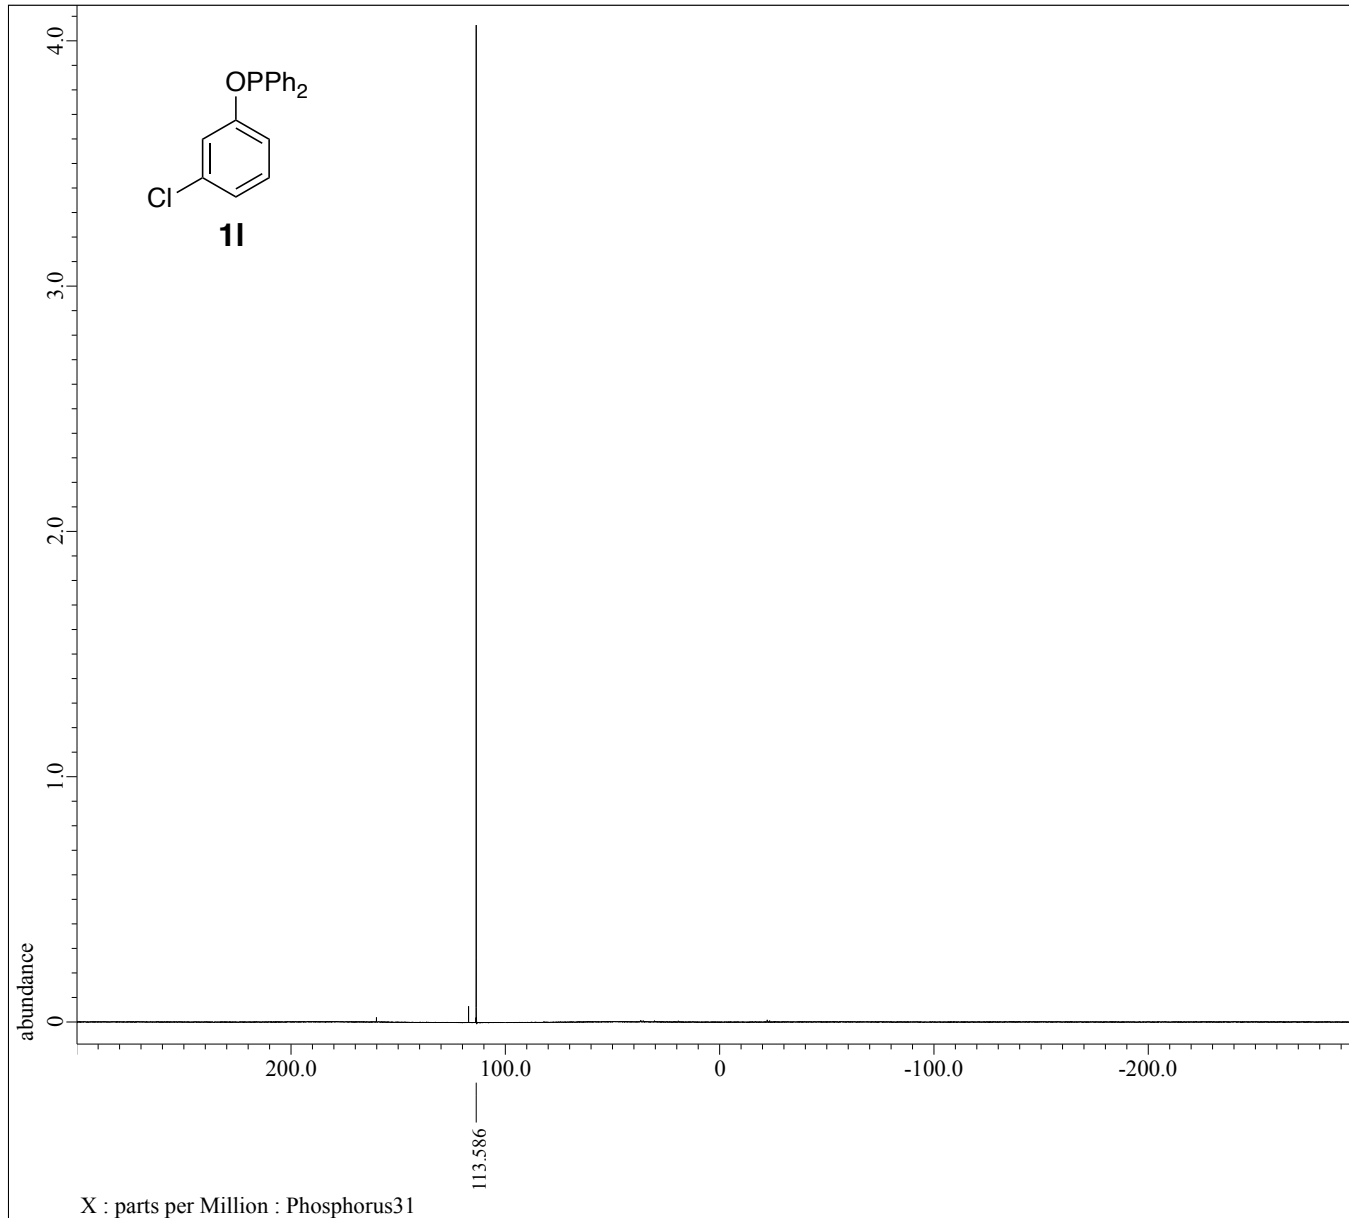

```

---- PROCESSING PARAMETERS ----
sexp( 2.0[Hz], 0.0[s] )
trapezoid( 0[%], 0[%], 80[%], 100[%] )
zerofill( 1, TRUE )
fft( 1, TRUE, TRUE )
machinephase
ppm
phase( 1, 0, 50[%] )

Derived from: YH(S-m-Cl)_31P_1Hdec-1-1.jdf

```

```

Filename           = YH(S-m-Cl)_31P_1Hd
Author             = delta
Experiment         = single_pulse_decou
Sample_Id          = YH(S-m-Cl)
Solvent            = BENZENE-D6
Actual_Start_Time  = 2-APR-2020 11:25:
Revision_Time      = 7-APR-2020 12:46:

Comment           = single_pulse decou
Data_Format       = 1D COMPLEX
Dim_Size          = 26214
X_Domain          = Phosphorus31
Dim_Title         = Phosphorus31
Dim_Units         = [ppm]
Dimensions        = X
Spectrometer      = JNM-ECZ500R/S1

Field_Strength    = 11.62926421[T] (50
X_Acq_Duration    = 0.18874368[s]
X_Domain          = 31P
X_Freq            = 200.43293989[MHz]
X_Offset          = 0[ppm]
X_Points          = 32768
X_Prescans        = 4
X_Resolution      = 5.29819065[Hz]
X_Sweep           = 173.61111111[kHz]
X_Sweep_Clipped   = 138.88888889[kHz]
Irr_Domain        = Proton
Irr_Freq          = 495.13191398[MHz]
Irr_Offset        = 5[ppm]
Clipped           = FALSE
Scans             = 64
Total_Scans       = 64

Relaxation_Delay  = 1[s]
Recvr_Gain        = 56
Temp_Get          = 20.4[dC]
X_90_Width        = 19.78[us]
X_Acq_Time        = 0.18874368[s]
X_Angle           = 30[deg]
X_Atn             = 9.4[dB]
X_Pulse           = 6.59333333[us]
Irr_Atn_Dec       = 23.948[dB]
Irr_Atn_Dec_Calc = 23.948[dB]
Irr_Atn_Dec_Default_Calc = 23.948[dB]
Irr_Atn_Noise     = 23.948[dB]
Irr_Dec_Bandwidth_Hz = 5.97826087[kHz]
Irr_Dec_Bandwidth_Ppm = 12.07407703[ppm]
Irr_Dec_Freq      = 495.13191398[MHz]
Irr_Dec_Merit_Factor = 2.2
Irr_Decoupling    = TRUE
Irr_Noise         = TRUE
Irr_Noise         = WALTZ

```

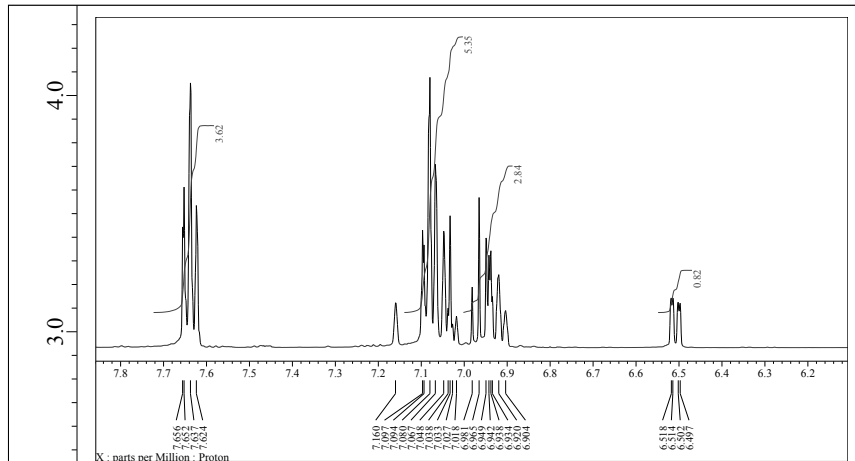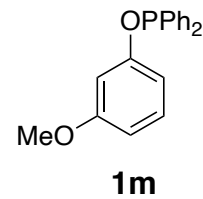

```

---- PROCESSING PARAMETERS ----
sexp( 0.2[Hz], 0.0[s] )
trapezoid( 0[%], 0[%], 80[%], 100[%] )
zerofill( 1, TRUE )
fft( 1, TRUE, TRUE )
machinephase
ppm
base_correct( Akima, 5, 0, FALSE, 3, None, FA
Derived from: YH(S-m-OMe)_Proton-1-1.jdf

```

```

Filename      = YH(S-m-OMe)_Proton-1-
Author       = delta
Experiment   = proton.jxp
Sample Id    = YH(S-m-OMe)
Solvent      = BENZENE-D6
Actual_Start_Time = 7-APR-2020 19:20:09
Revision_Time   = 7-APR-2020 20:38:20

```

```

Comment      = single pulse
Data Format   = 1D REAL
Dim Size     = 13107
X Domain     = Proton
Dim Title    = Proton
Dim Units    = [ppm]
Dimensions   = X
Spectrometer = JNM-ECZ500R/s1

```

```

Field Strength = 11.62926421[T] (500[M]
X Acq Duration = 1.76422912[s]
X Domain       = 1H
X Freq         = 495.13191398[MHz]
X Offset       = 5[ppm]
X Points       = 16384
X Prescans     = 1
X Resolution   = 0.5668198 [Hz]
X Sweep       = 9.28677563 [kHz]
X Sweep Clipped = 7.42942051 [kHz]
Irr Domain     = Proton
Irr Freq       = 495.13191398[MHz]
Irr Offset     = 5[ppm]
Tri Domain     = Proton
Tri Freq       = 495.13191398[MHz]
Tri Offset     = 5[ppm]
Clipped        = FALSE
Scans          = 8
Total_Scans    = 8

```

```

Relaxation_Delay = 5[s]
Recvr Gain       = 36
Temp_Get         = 20.2 [dC]
X 90 Width      = 9.58 [us]
X Acq Time       = 1.76422912[s]
X Angle         = 45 [deg]
X Atn           = 4.3 [dB]
X Pulse         = 4.79 [us]
Irr Mode        = Off
Tri Mode        = Off
Dante Loop      = 500
Dante_Presat    = FALSE
Decimation Rate = 0
Initial_Wait    = 1[s]
Phase           = {0, 90, 270, 180, 180}
Presat_Time     = 5[s]

```

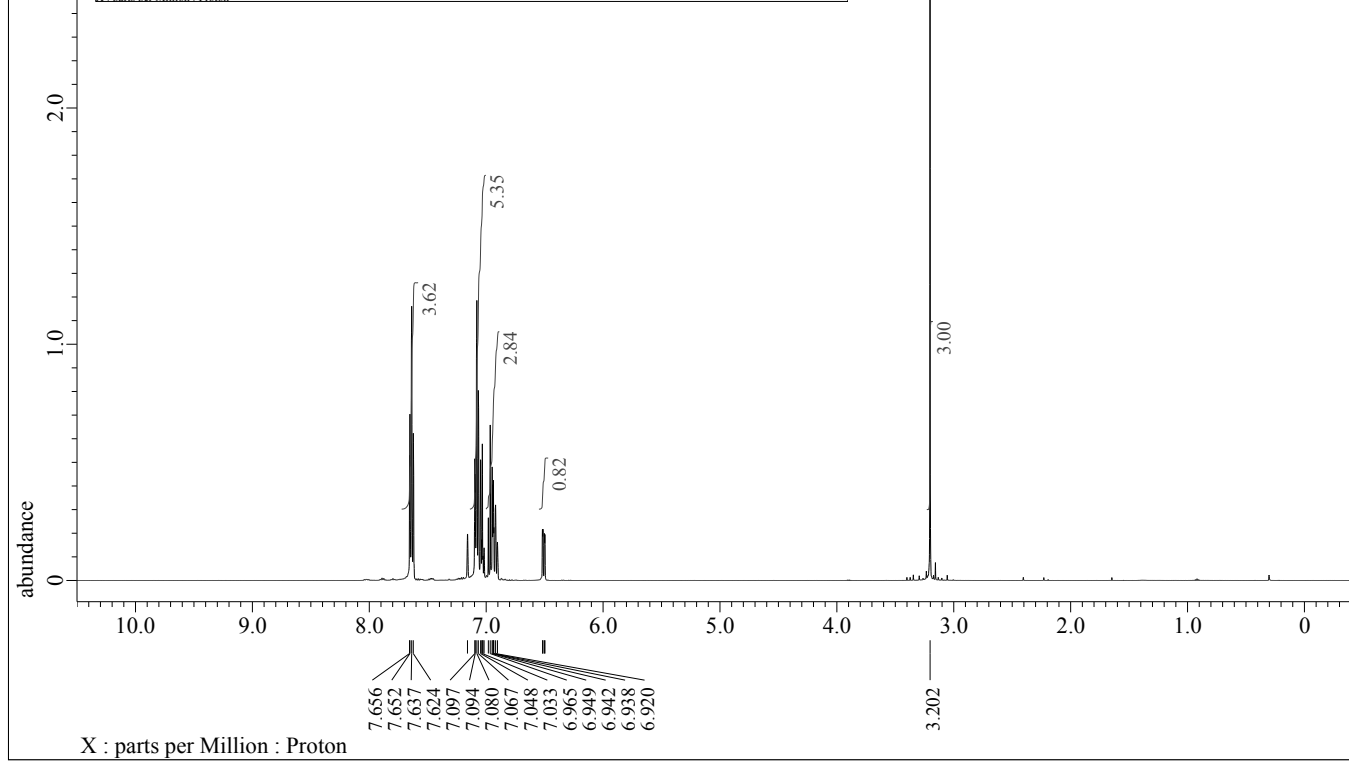

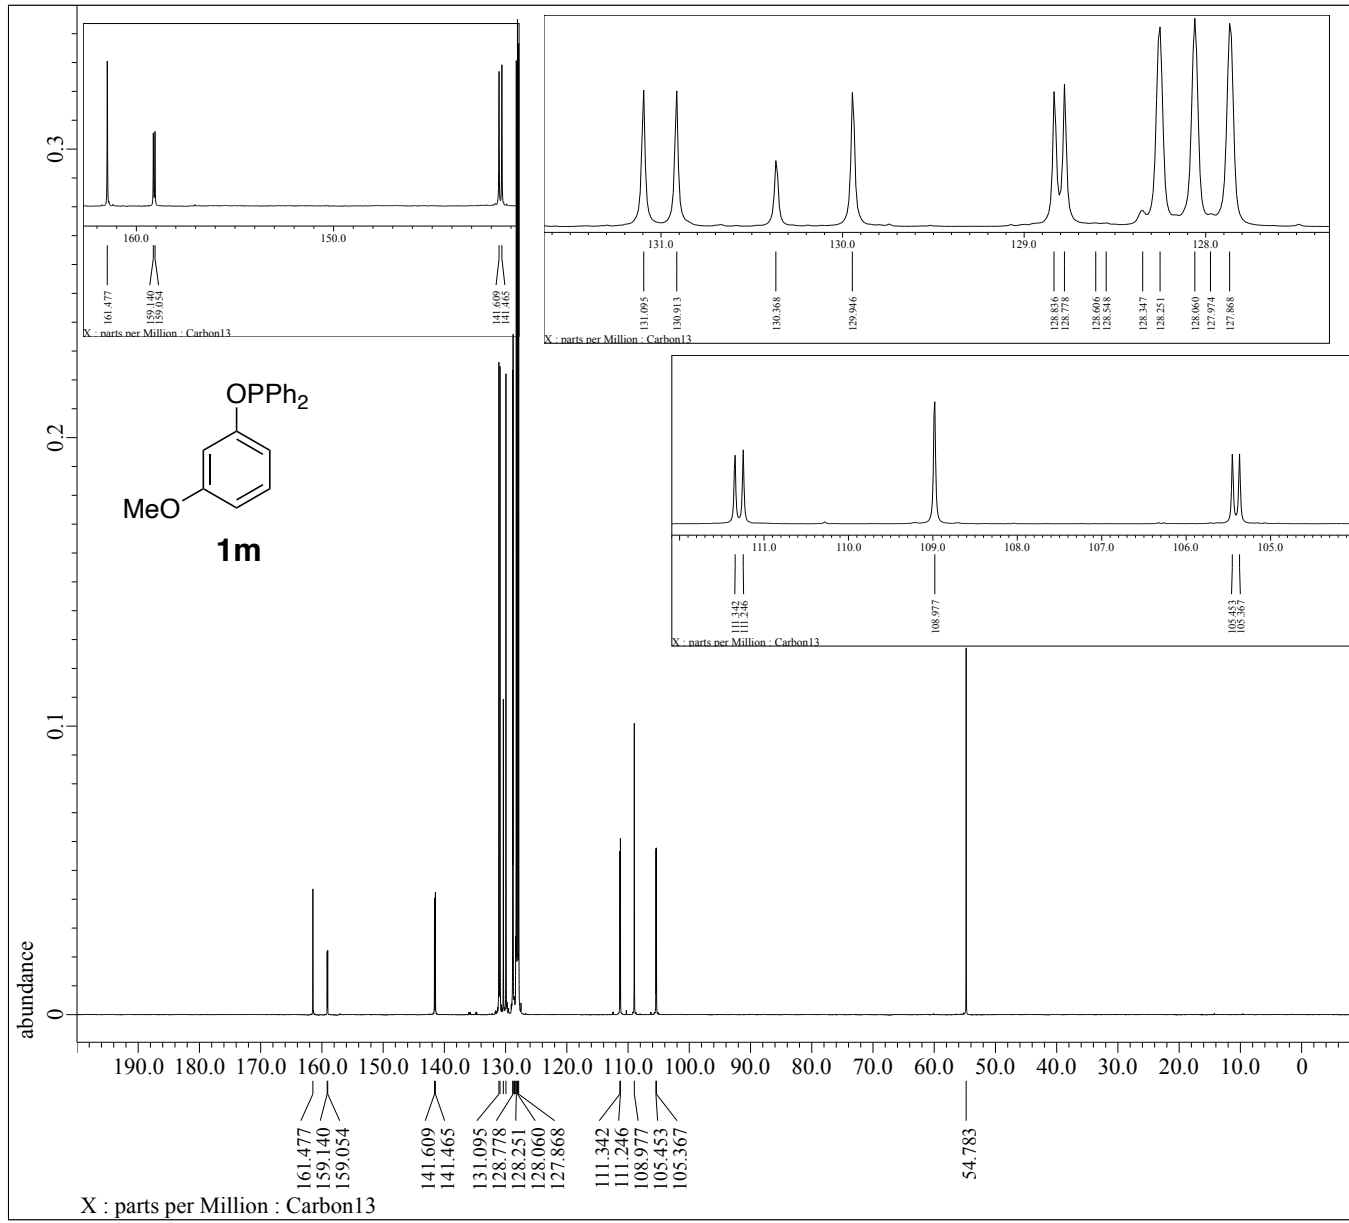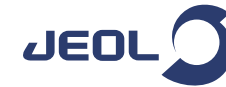

```

---- PROCESSING PARAMETERS ----
sexp( 2.0[Hz], 0.0[s] )
trapezoid( 0[%], 0[%], 80[%], 100[%] )
zerofill( 1, TRUE )
fft( 1, TRUE, TRUE )
machinephase
ppm
phase( -2, 0, 50[%] )
base_correct( Akima, 5, 0, FALSE, 3, None, FA
Derived from: YH(S-m-OMe)-c_Carbon-1-1.jdf

```

```

Filename      = YH(S-m-OMe)-c_Carb
Author        = delta
Experiment    = carbon.jxp
Sample_Id     = YH(S-m-OMe)-c
Solvent       = BENZENE-D6
Actual_Start_Time = 8-APR-2020 00:05:
Revision_Time = 9-APR-2020 14:15:

```

```

Comment      = single pulse decou
Data Format   = 1D REAL
Dim Size     = 26214
X Domain     = Carbon13
Dim Title    = Carbon13
Dim Units    = [ppm]
Dimensions   = X
Spectrometer = JNM-ECZ500R/S1

```

```

Field Strength = 11.62926421[T] (50
X Acq Duration = 0.8388608[s]
X Domain       = 13C
X Freq         = 124.5010059[MHz]
X Offset       = 100[ppm]
X Points       = 32768
X Prescans     = 4
X Resolution   = 1.1920929[Hz]
X Sweep        = 39.0625[kHz]
X Sweep Clipped = 31.25[kHz]
Irr Domain     = Proton
Irr Freq       = 495.13191398[MHz]
Irr Offset     = 5[ppm]
Clipped        = FALSE
Scans          = 1000
Total_Scans    = 1000

```

```

Relaxation_Delay = 2[s]
Recvr Gain        = 56
Temp_Get          = 20.7[dC]
X 90_Width       = 9.61[us]
X Acq Time        = 0.8388608[s]
X Angle           = 30[deg]
X Atn             = 10[dB]
X Pulse           = 3.20333333[us]
Irr Atn Dec       = 23.948[dB]
Irr Atn Dec Calc  = 23.948[dB]
Irr Atn Dec Default_Calc = 23.948[dB]
Irr Atn Noe       = 23.948[dB]
Irr Dec Bandwidth_Hz = 5.97826087[kHz]
Irr Dec Bandwidth_Ppm = 12.07407703[ppm]
Irr Dec Freq      = 495.13191398[MHz]
Irr Dec Merit Factor = 2.2
Irr Decoupling    = TRUE
Irr Noe           = TRUE
Irr Noise         = WALTZ

```

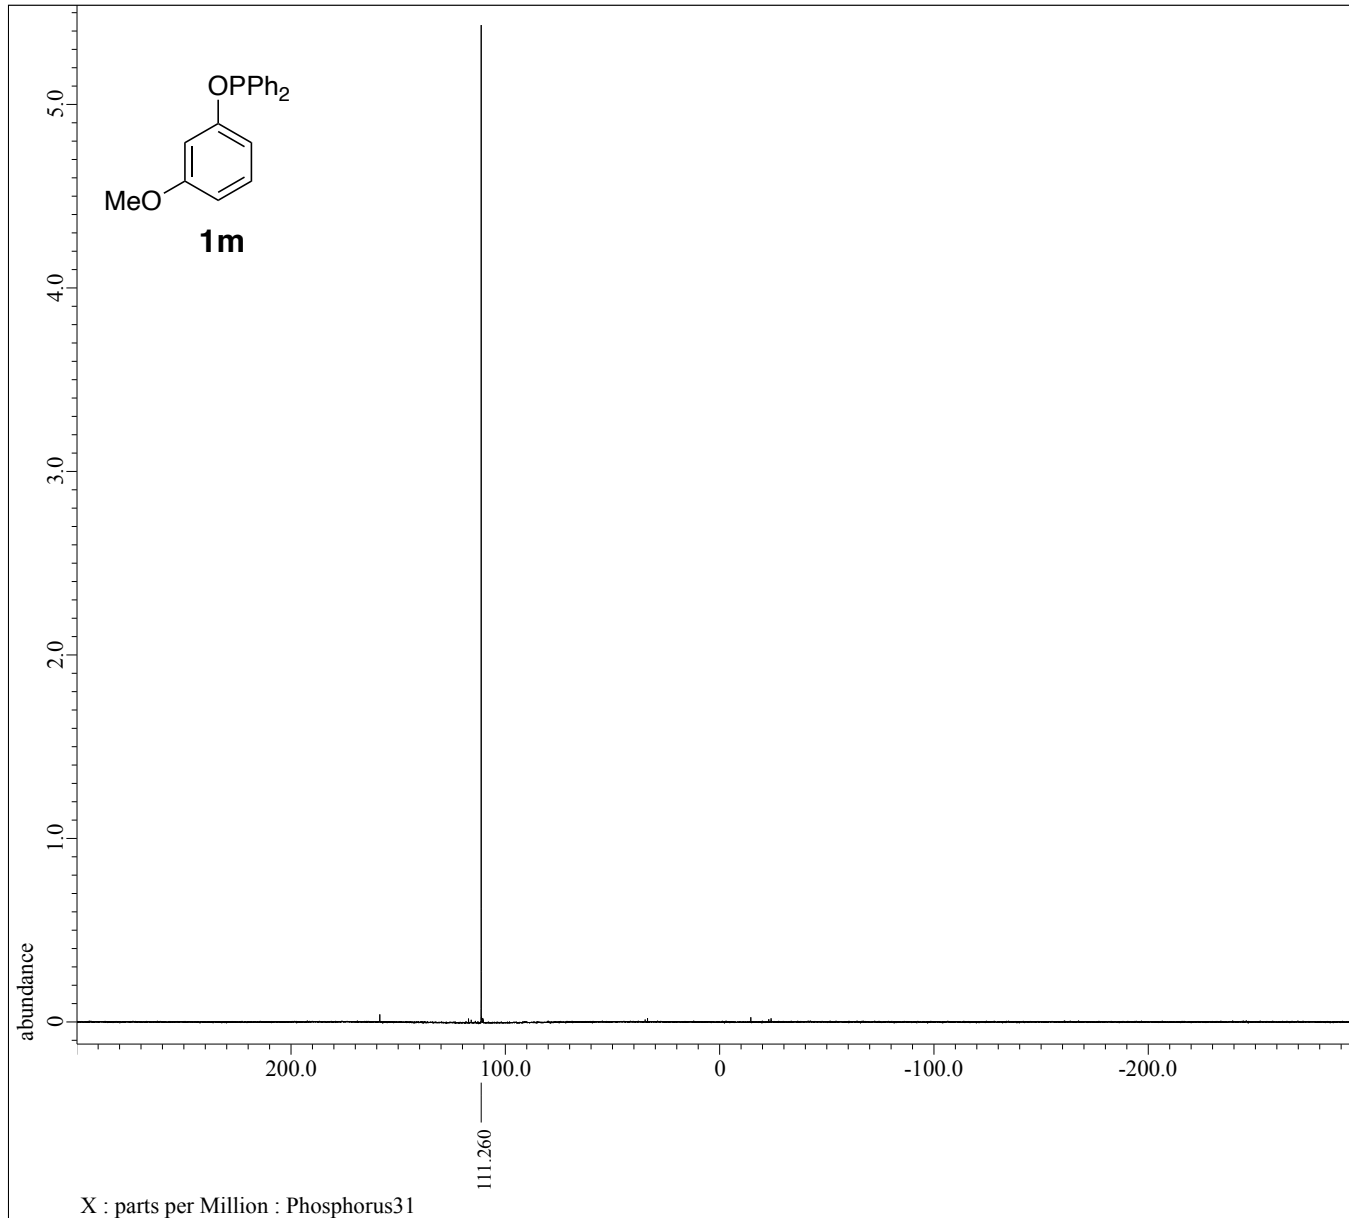

```

---- PROCESSING PARAMETERS ----
sexp( 2.0[Hz], 0.0[s] )
trapezoid( 0[%], 0[%], 80[%], 100[%] )
zerofill( 1, TRUE )
fft( 1, TRUE, TRUE )
machinephase
ppm
phase( -89.40637, 0, 50[%] )

Derived from: YH(S-m-OMe)_31P_1Hdec-1-1.jdf

```

```

Filename           = YH(S-m-OMe)_31P_1H
Author             = delta
Experiment         = single_pulse_decou
Sample_Id          = YH(S-m-OMe)
Solvent            = BENZENE-D6
Actual_Start_Time  = 7-APR-2020 22:12:
Revision_Time      = 8-APR-2020 11:51:

Comment           = single_pulse decou
Data_Format       = 1D COMPLEX
Dim_Size          = 26214
X_Domain          = Phosphorus31
Dim_Title         = Phosphorus31
Dim_Units         = [ppm]
Dimensions        = X
Spectrometer      = JNM-ECZ500R/S1

Field_Strength    = 11.62926421[T] (50
X_Acq_Duration    = 0.18874368[s]
X_Domain          = 31P
X_Freq            = 200.43293989[MHz]
X_Offset          = 0[ppm]
X_Points          = 32768
X_Prescans        = 4
X_Resolution      = 5.29819065[Hz]
X_Sweep           = 173.61111111[kHz]
X_Sweep_Clippped = 138.88888889[kHz]
Irr_Domain        = Proton
Irr_Freq          = 495.13191398[MHz]
Irr_Offset        = 5[ppm]
Clipped           = FALSE
Scans             = 64
Total_Scans       = 64

Relaxation_Delay  = 1[s]
Recvr_Gain        = 66
Temp_Get          = 20.5[dC]
X_90_Width        = 19.78[us]
X_Acq_Time        = 0.18874368[s]
X_Angle           = 30[deg]
X_Atn             = 9.4[dB]
X_Pulse           = 6.59333333[us]
Irr_Atn_Dec       = 23.948[dB]
Irr_Atn_Dec_Calc = 23.948[dB]
Irr_Atn_Dec_Default_Calc = 23.948[dB]
Irr_Atn_Noise     = 23.948[dB]
Irr_Dec_Bandwidth_Hz = 5.97826087[kHz]
Irr_Dec_Bandwidth_Ppm = 12.07407703[ppm]
Irr_Dec_Freq      = 495.13191398[MHz]
Irr_Dec_Merit_Factor = 2.2
Irr_Decoupling    = TRUE
Irr_Noise         = TRUE
Irr_Noise         = WALTZ

```

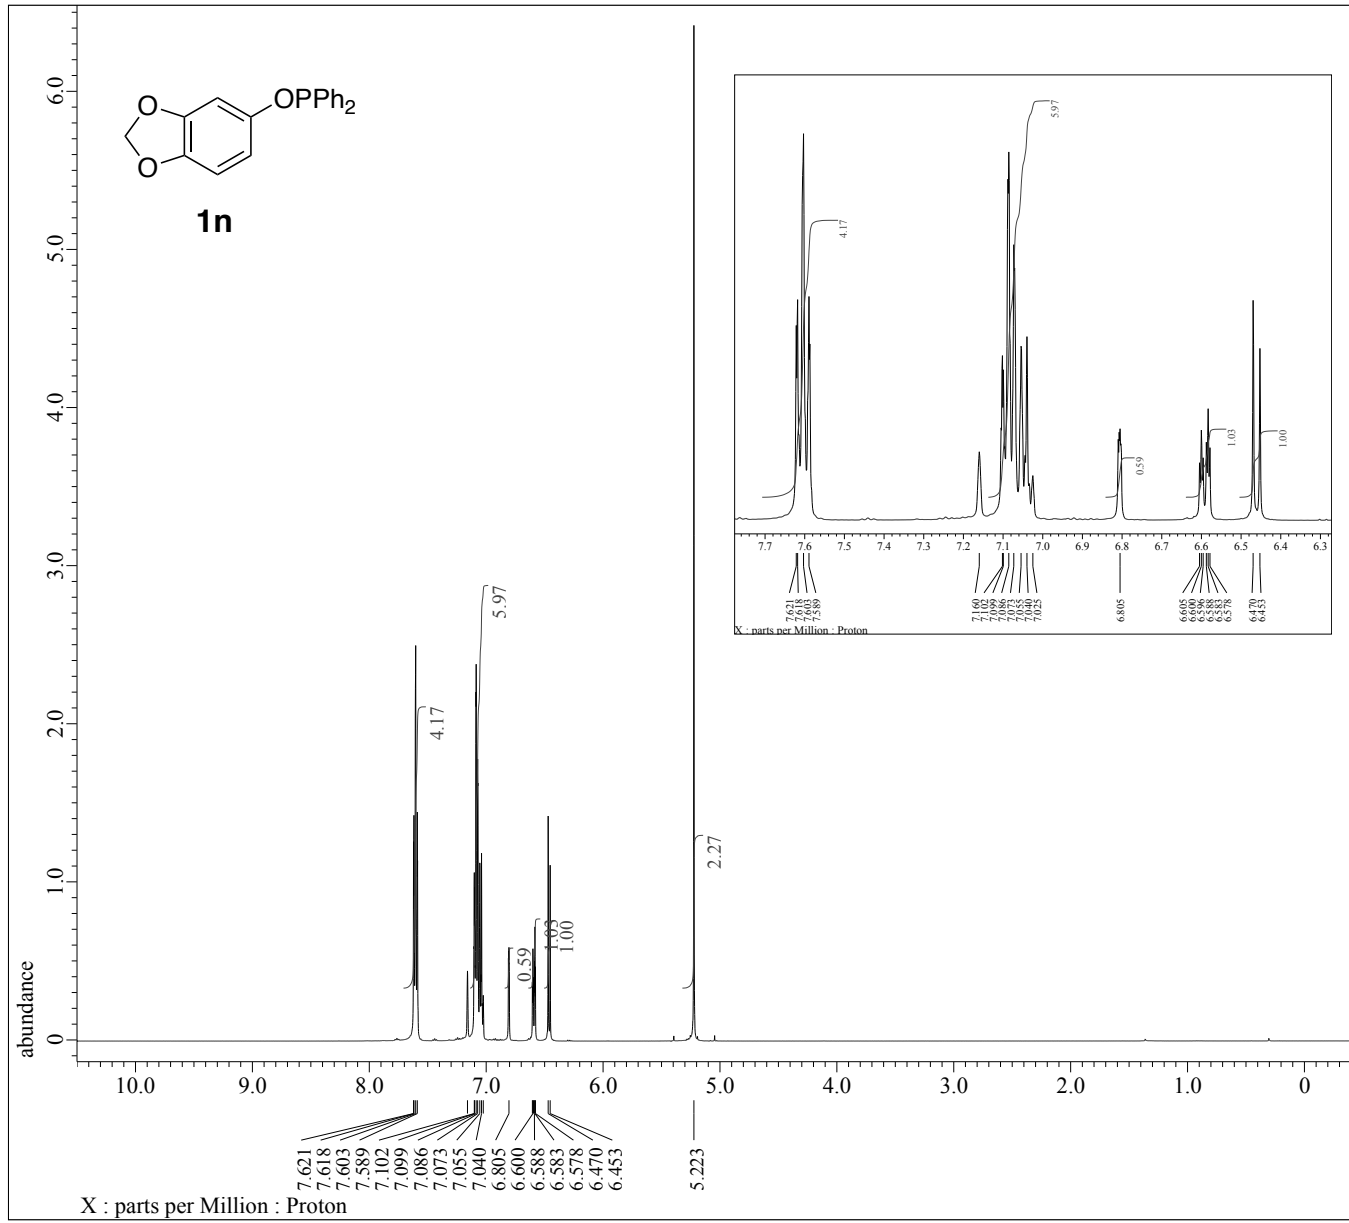

---- PROCESSING PARAMETERS ----  
 sexp( 0.2[Hz], 0.0[s] )  
 trapezoid( 0[%], 0[%], 80[%], 100[%] )  
 zerofill( 1, TRUE )  
 fft( 1, TRUE, TRUE )  
 machinephase  
 ppm  
 Derived from: YH(OMO)\_Proton-1-1.jdf

Filename = YH(OMO)\_Proton-1-2.jd  
 Author = delta  
 Experiment = proton.jxp  
 Sample Id = YH(OMO)  
 Solvent = BENZENE-D6  
 Actual\_Start\_Time = 6-APR-2020 22:17:15  
 Revision\_Time = 7-APR-2020 10:19:25

Comment = single pulse  
 Data Format = 1D COMPLEX  
 Dim Size = 13107  
 X Domain = Proton  
 Dim Title = Proton  
 Dim Units = [ppm]  
 Dimensions = X  
 Spectrometer = JNM-ECZ500R/s1

Field Strength = 11.62926421[T] (500[M]  
 X Acq Duration = 1.76422912[s]  
 X Domain = 1H  
 X Freq = 495.13191398[MHz]  
 X Offset = 5[ppm]  
 X Points = 16384  
 X Prescans = 1  
 X Resolution = 0.5668198 [Hz]  
 X Sweep = 9.28677563 [kHz]  
 X Sweep Clipped = 7.42942051 [kHz]  
 Irr Domain = Proton  
 Irr Freq = 495.13191398 [MHz]  
 Irr Offset = 5 [ppm]  
 Tri Domain = Proton  
 Tri Freq = 495.13191398 [MHz]  
 Tri Offset = 5 [ppm]  
 Clipped = FALSE  
 Scans = 8  
 Total\_Scans = 8

Relaxation\_Delay = 5[s]  
 Recvr Gain = 36  
 Temp\_Get = 21.4 [dC]  
 X 90 Width = 9.58 [us]  
 X Acq Time = 1.76422912 [s]  
 X Angle = 45 [deg]  
 X Atn = 4.3 [dB]  
 X Pulse = 4.79 [us]  
 Irr Mode = Off  
 Tri Mode = Off  
 Dante Loop = 500  
 Dante\_Presat = FALSE  
 Decimation Rate = 0  
 Initial\_Wait = 1 [s]  
 Phase = {0, 90, 270, 180, 180  
 Presat\_Time = 5 [s]

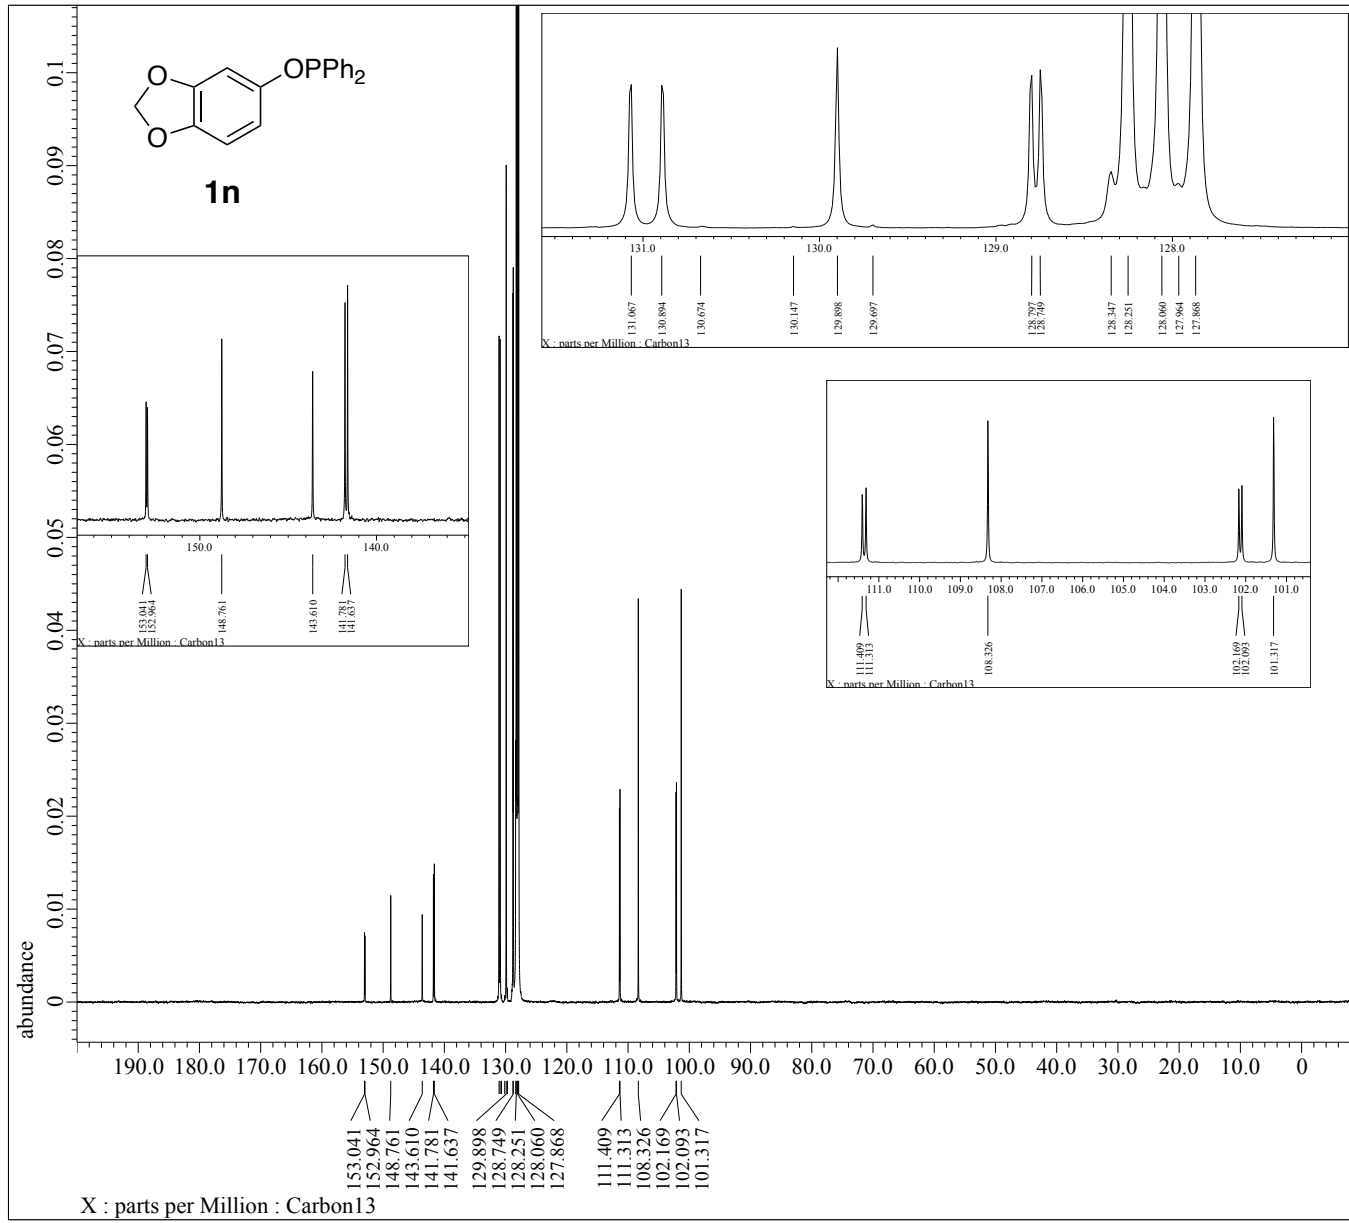

---- PROCESSING PARAMETERS ----  
 sexp( 2.0[Hz], 0.0[s] )  
 trapezoid( 0[%], 0[%], 80[%], 100[%] )  
 zerofill( 1, TRUE )  
 fft( 1, TRUE, TRUE )  
 machinephase  
 ppm  
 phase( -1.25, 0, 50[%] )  
 base\_correct( Akima, 5, 0, FALSE, 3, None, FA )  
 Derived from: YH(OMO)\_Carbon-1-1.jdf

Filename = YH(OMO)\_Carbon-1-2  
 Author = delta  
 Experiment = carbon.jxp  
 Sample\_Id = YH(OMO)  
 Solvent = BENZENE-D6  
 Actual\_Start\_Time = 7-APR-2020 00:06:  
 Revision\_Time = 9-APR-2020 13:36:

Comment = single pulse decou  
 Data Format = 1D REAL  
 Dim\_Size = 26214  
 X\_Domain = Carbon13  
 Dim\_Title = Carbon13  
 Dim\_Units = [ppm]  
 Dimensions = X  
 Spectrometer = JNM-ECZ500R/S1

Field Strength = 11.62926421[T] (50  
 X\_Acq\_Duration = 0.8388608[s]  
 X\_Domain = 13C  
 X\_Freq = 124.5010059[MHz]  
 X\_Offset = 100[ppm]  
 X\_Points = 32768  
 X\_Prescans = 4  
 X\_Resolution = 1.1920929[Hz]  
 X\_Sweep = 39.0625[kHz]  
 X\_Sweep\_Clippped = 31.25[kHz]  
 Irr\_Domain = Proton  
 Irr\_Freq = 495.13191398[MHz]  
 Irr\_Offset = 5[ppm]  
 Clipped = FALSE  
 Scans = 1024  
 Total\_Scans = 1024

Relaxation\_Delay = 2[s]  
 Recvr\_Gain = 56  
 Temp\_Get = 20.9[dC]  
 X\_90\_Width = 9.61[us]  
 X\_Acq\_Time = 0.8388608[s]  
 X\_Angle = 30[deg]  
 X\_Atn = 10[dB]  
 X\_Pulse = 3.20333333[us]  
 Irr\_Atn\_Dec = 23.948[dB]  
 Irr\_Atn\_Dec\_Calc = 23.948[dB]  
 Irr\_Atn\_Dec\_Default\_Calc = 23.948[dB]  
 Irr\_Atn\_Noise = 23.948[dB]  
 Irr\_Dec\_Bandwidth\_Hz = 5.97826087[kHz]  
 Irr\_Dec\_Bandwidth\_Ppm = 12.07407703[ppm]  
 Irr\_Dec\_Freq = 495.13191398[MHz]  
 Irr\_Dec\_Merit\_Factor = 2.2  
 Irr\_Decoupling = TRUE  
 Irr\_Noise = TRUE  
 Irr\_Noise = WALTZ



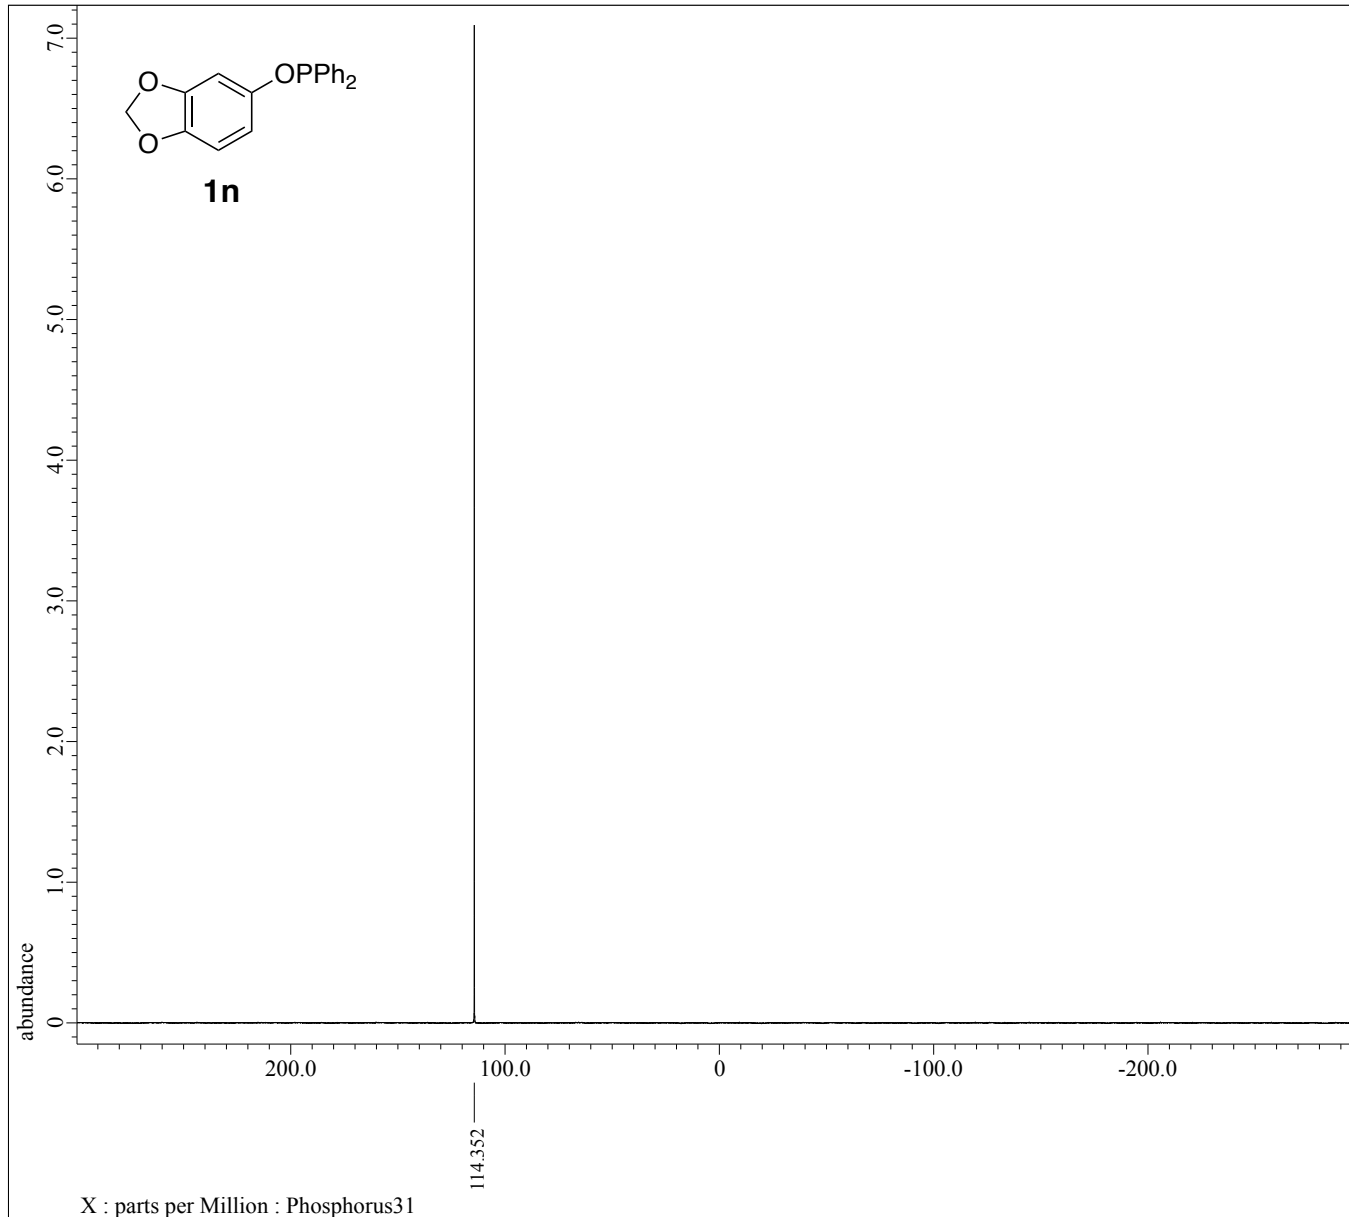

```

---- PROCESSING PARAMETERS ----
sexp( 2.0[Hz], 0.0[s] )
trapezoid( 0[%], 0[%], 80[%], 100[%] )
zerofill( 1, TRUE )
fft( 1, TRUE, TRUE )
machinephase
ppm
phase( -43.60394, 0, 50[%] )
base_correct( Akima, 5, 0, FALSE, 3, None, FA
Derived from: YH(S-OMO)_31P_1Hdec-1-1.jdf

```

```

Filename           = YH(S-OMO)_31P_1Hde
Author            = delta
Experiment        = single_pulse_decou
Sample_Id         = YH(S-OMO)
Solvent           = BENZENE-D6
Actual_Start_Time = 7-APR-2020 22:34:
Revision_Time     = 8-APR-2020 09:38:

Comment           = single_pulse decou
Data_Format       = 1D REAL
Dim_Size          = 26214
X_Domain          = Phosphorus31
Dim_Title         = Phosphorus31
Dim_Units         = [ppm]
Dimensions        = X
Spectrometer      = JNM-ECZ500R/S1

Field_Strength    = 11.62926421[T] (50
X_Acq_Duration    = 0.18874368[s]
X_Domain          = 31P
X_Freq            = 200.43293989[MHz]
X_Offset          = 0[ppm]
X_Points          = 32768
X_Prescans        = 4
X_Resolution      = 5.29819065[Hz]
X_Sweep           = 173.61111111[kHz]
X_Sweep_Clippped = 138.88888889[kHz]
Irr_Domain        = Proton
Irr_Freq          = 495.13191398[MHz]
Irr_Offset        = 5[ppm]
Clipped           = FALSE
Scans             = 64
Total_Scans       = 64

Relaxation_Delay  = 1[s]
Recvr_Gain        = 66
Temp_Get          = 20.4[dC]
X_90_Width        = 19.78[us]
X_Acq_Time        = 0.18874368[s]
X_Angle           = 30[deg]
X_Atn             = 9.4[dB]
X_Pulse           = 6.59333333[us]
Irr_Atn_Dec       = 23.948[dB]
Irr_Atn_Dec_Calc = 23.948[dB]
Irr_Atn_Dec_Default_Calc = 23.948[dB]
Irr_Atn_Noise    = 23.948[dB]
Irr_Dec_Bandwidth_Hz = 5.97826087[kHz]
Irr_Dec_Bandwidth_Ppm = 12.07407703[ppm]
Irr_Dec_Freq     = 495.13191398[MHz]
Irr_Dec_Merit_Factor = 2.2
Irr_Decoupling   = TRUE
Irr_Noise        = TRUE
Irr_Noise        = WALTZ

```

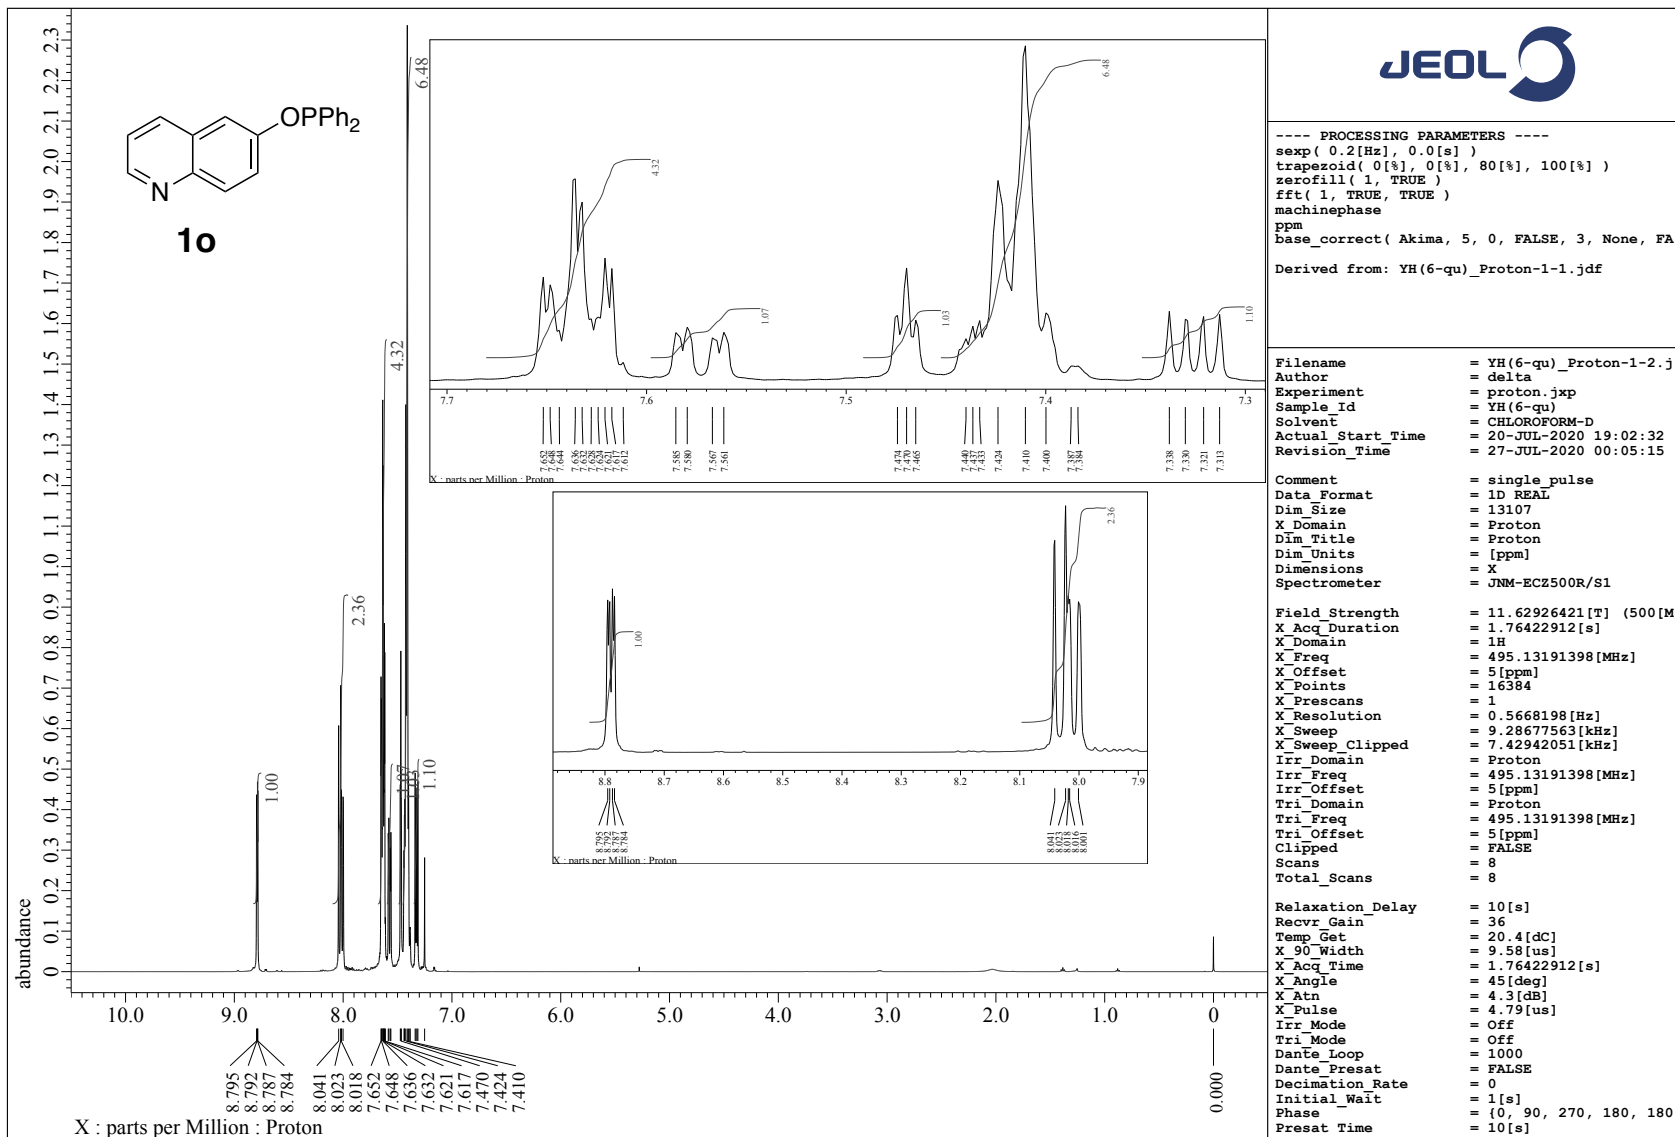

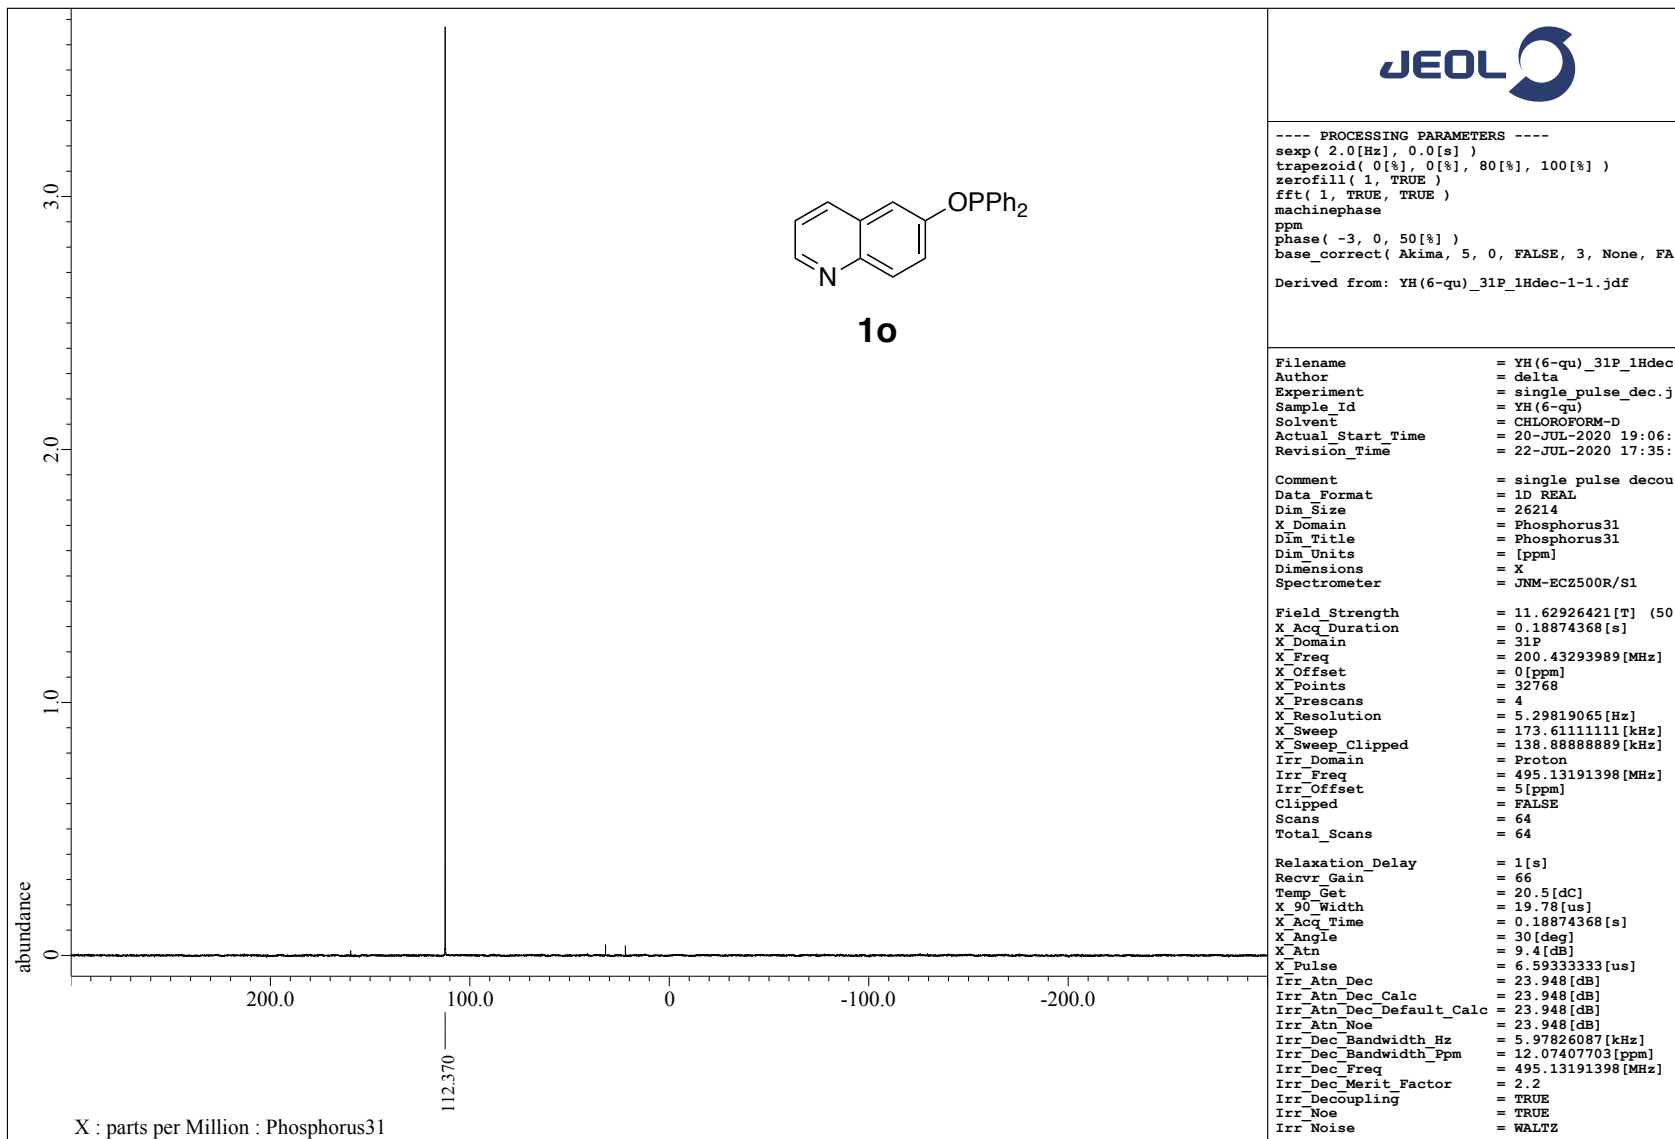

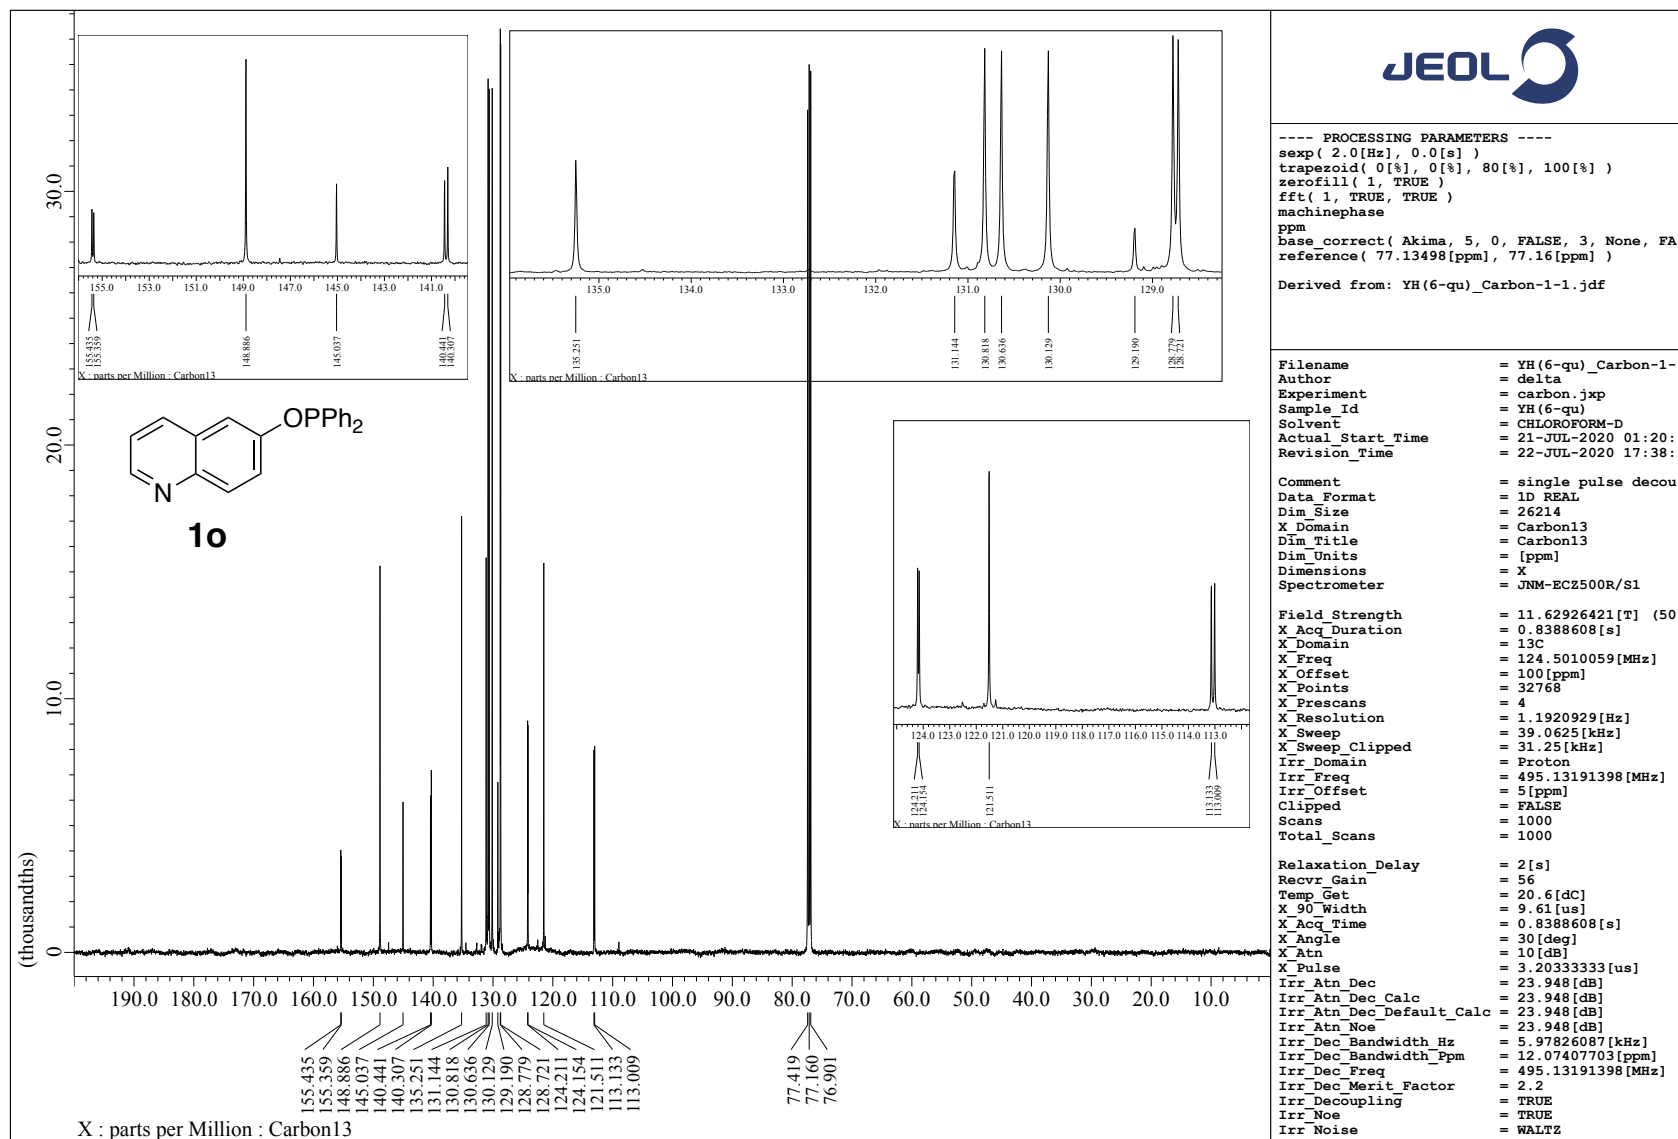

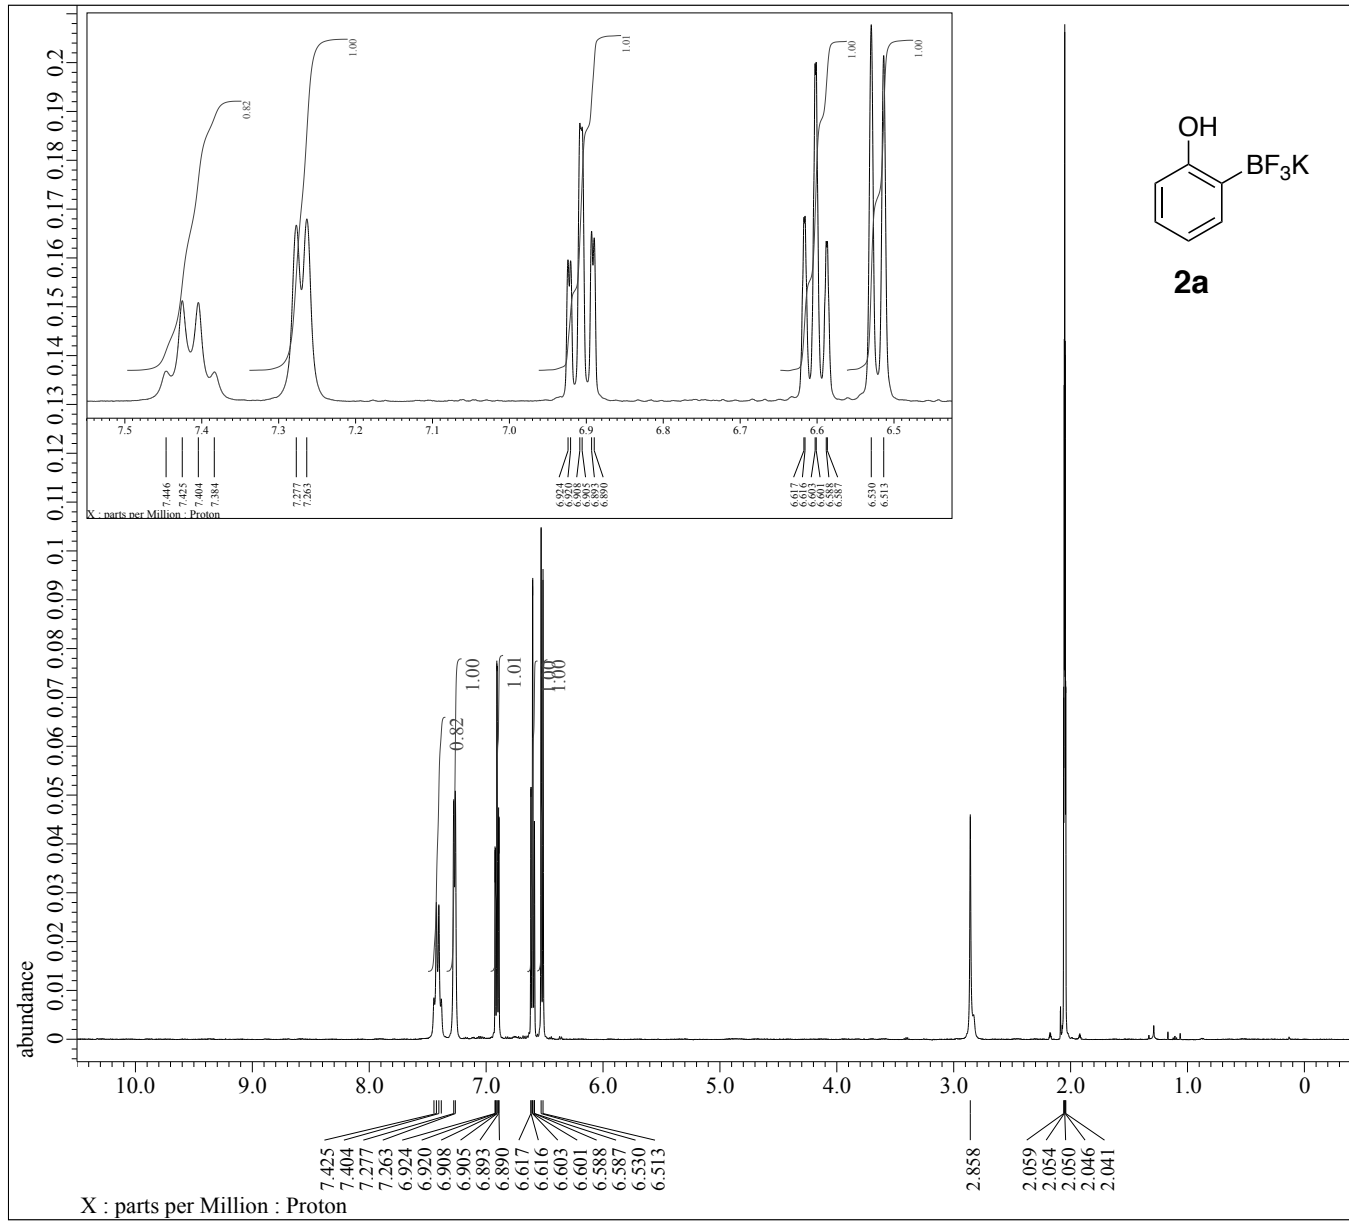

---- PROCESSING PARAMETERS ----  
 sexp( 0.2[Hz], 0.0[s] )  
 trapezoid( 0[%], 0[%], 80[%], 100[%] )  
 zerofill( 1, TRUE )  
 fft( 1, TRUE, TRUE )  
 machinphase  
 ppm  
 base\_correct( Akima, 5, 0, FALSE, 3, None, FA  
 Derived from: YH-225-(H)\_Proton-1-1.jdf

Filename = YH-225-(H)\_Proton-1-3  
 Author = delta  
 Experiment = proton.jxp  
 Sample Id = YH-225-(H)  
 Solvent = ACETONE-D6  
 Actual\_Start\_Time = 22-FEB-2020 17:29:44  
 Revision\_Time = 13-APR-2020 12:26:36

Comment = single pulse  
 Data Format = 1D REAL  
 Dim\_Size = 104858  
 X\_Domain = Proton  
 Dim\_Title = Proton  
 Dim\_Units = [ppm]  
 Dimensions = X  
 Spectrometer = JNM-ECZ500R/s1

Field Strength = 11.62926421[T] (500[M  
 X\_Acq\_Duration = 14.11383296[s]  
 X\_Domain = 1H  
 X\_Freq = 495.13191398[MHz]  
 X\_Offset = 5[ppm]  
 X\_Points = 131072  
 X\_Prescans = 1  
 X\_Resolution = 70.85247522[mHz]  
 X\_Sweep = 9.28677563[kHz]  
 X\_Sweep\_Clippped = 7.42942051[kHz]  
 Irr\_Domain = Proton  
 Irr\_Freq = 495.13191398[MHz]  
 Irr\_Offset = 5[ppm]  
 Tri\_Domain = Proton  
 Tri\_Freq = 495.13191398[MHz]  
 Tri\_Offset = 5[ppm]  
 Clipped = FALSE  
 Scans = 8  
 Total\_Scans = 8

Relaxation\_Delay = 3[s]  
 Recvr Gain = 56  
 Temp\_Get = 21.3[dC]  
 X\_90\_Width = 7.12[us]  
 X\_Acq\_Time = 14.11383296[s]  
 X\_Angle = 45[deg]  
 X\_Atn = 3.3[dB]  
 X\_Pulse = 3.56[us]  
 Irr\_Mode = Off  
 Tri\_Mode = Off  
 Dante Loop = 299  
 Dante\_Presat = FALSE  
 Decimation\_Rate = 0  
 Initial\_Wait = 1[s]  
 Phase = {0, 90, 270, 180, 180  
 Presat\_Time = 3[s]

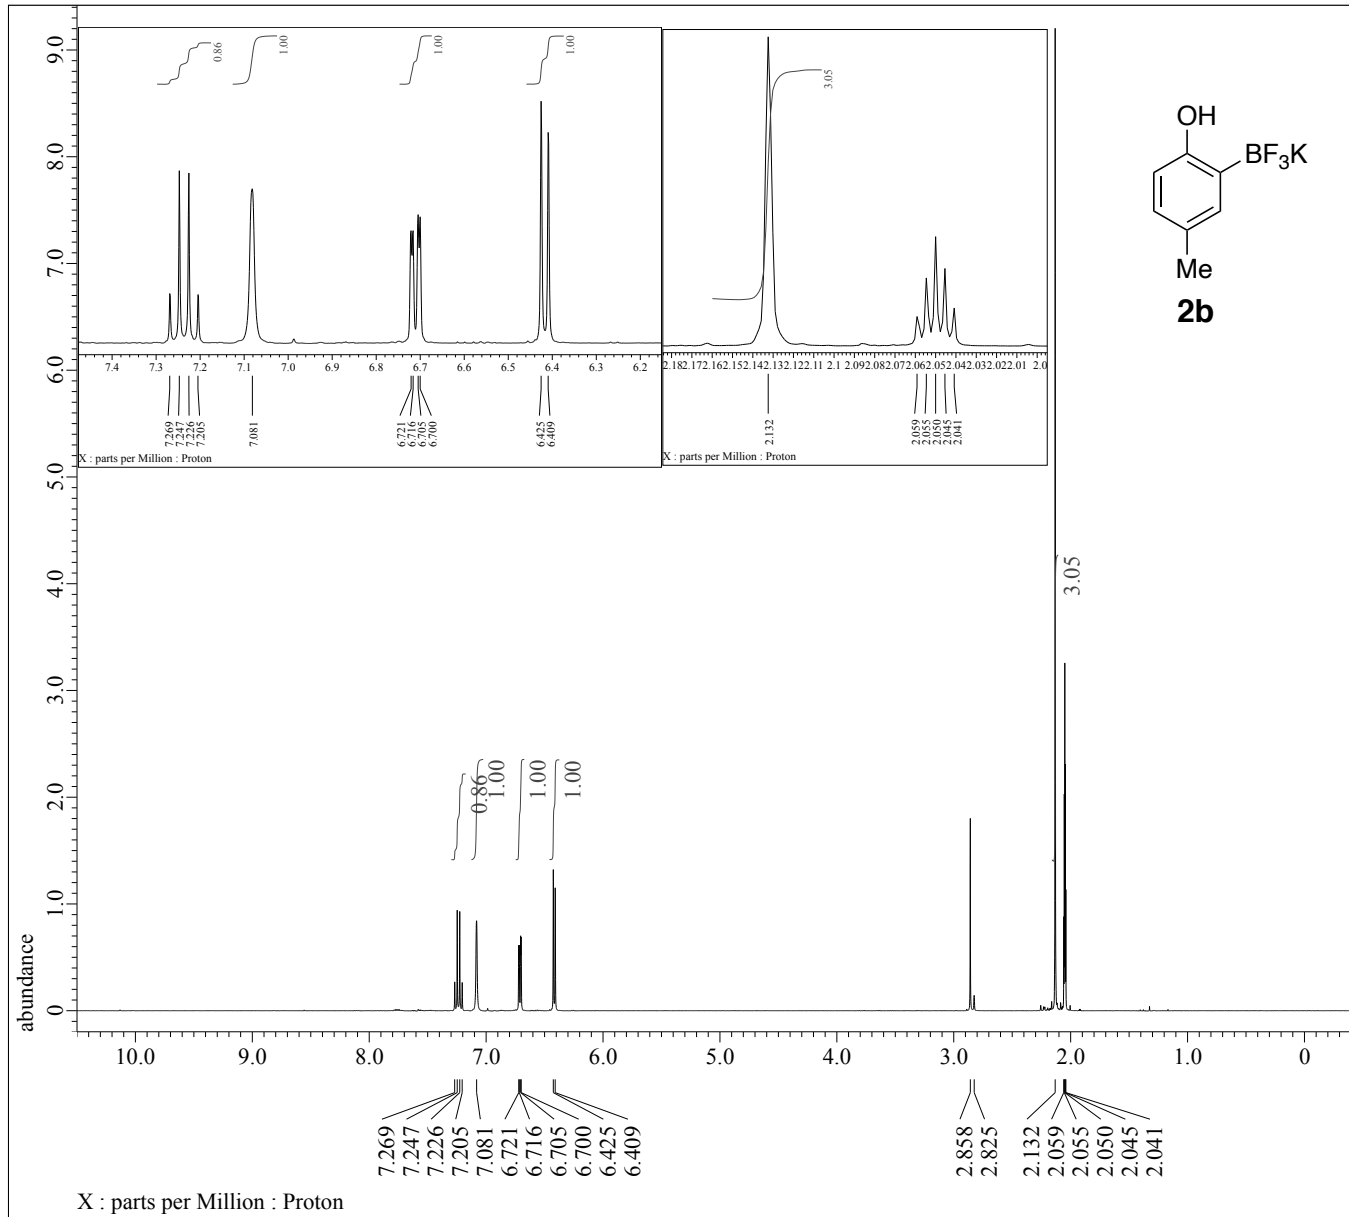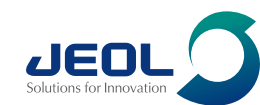

```

---- PROCESSING PARAMETERS ----
sexp( 0.2[Hz], 0.0[s] )
trapezoid( 0[%], 0[%], 80[%], 100[%] )
zerofill( 1 )
fft( 1, TRUE, TRUE )
machinephase
ppm
phase( 2.25, -23, 69.74668[%] )
base_correct( None, 0, Smooth )
以下に由来 : YH-161(p-Me)_Proton-1-1.jdf

```

```

Filename      = YH-161(p-Me)_Proton-1
Author       = delta
Experiment   = proton.jxp
Sample Id    = YH-161(p-Me)
Solvent      = ACETONE-D6
Creation Time = 10-MAR-2020 22:25:05
Revision Time = 11-MAR-2020 11:49:15
Current Time  = 11-MAR-2020 11:49:27

```

```

Comment      = single pulse
Data Format   = 1D REAL
Dim Size     = 13107
Dim Title    = Proton
Dim Units    = [ppm]
Dimensions   = X
Spectrometer = JNM-ECZ500R/s1

```

```

Field Strength = 11.62926421[T] (500[M]
X Acq Duration = 1.76422912[s]
X Domain       = 1H
X Freq         = 495.13191398[MHz]
X Offset       = 5[ppm]
X Points       = 16384
X Prescans     = 1
X Resolution   = 0.5668198[Hz]
X Sweep        = 9.28677563[kHz]
X Sweep Clipped = 7.42942051[kHz]
Irr Domain     = Proton
Irr Freq       = 495.13191398[MHz]
Irr Offset     = 5[ppm]
Tri Domain     = Proton
Tri Freq       = 495.13191398[MHz]
Tri Offset     = 5[ppm]
Clipped        = FALSE
Decimation_Reg = r : 1346 ( 1345 ), g : 52
Scans          = 8
Total_Scans    = 8

```

```

Relaxation_Delay = 5[s]
Recvr Gain       = 66
Temp Get         = 21.9[dC]
X 90_Width       = 7.12[us]
X Acq Time       = 1.76422912[s]
X Angle          = 45[deg]
X Atn            = 3.3[dB]
X Pulse         = 3.56[us]
Irr Mode         = Off
Tri Mode         = Off
Comment 1       = *** Pulse ***
Comment 111     = *** presat time ***
Comment 201     = *** obs_dante presatu
Comment 202     = *** irr_ preaturation
Comment 203     = *** tri_ preaturation

```

```

---- PROCESSING PARAMETERS ----
sexp( 0.2[Hz], 0.0[s] )
trapezoid( 0[%], 0[%], 80[%], 100[%] )
zerofill( 1 )
fft( 1, TRUE, TRUE )
machinephase
ppm
phase( 2.5, -21, 69.8535[%] )
base_correct( None, 0, Smooth )

```

以下に由来 : YH-54 (p-MeO)\_Proton-1-1.jdf

```

Filename      = YH-54 (p-MeO)_Proton-1
Author       = delta
Experiment   = proton.jxp
Sample_Id    = YH-54 (p-MeO)
Solvent      = ACETONE-D6
Creation_Time = 10-MAR-2020 22:02:19
Revision_Time = 11-MAR-2020 12:52:33
Current_Time  = 11-MAR-2020 12:53:26

```

```

Comment       = single pulse
Data Format    = 1D REAL
Dim Size      = 13107
Dim Title     = Proton
Dim Units     = [ppm]
Dimensions    = X
Spectrometer  = JNM-ECZ500R/s1

```

```

Field Strength = 11.62926421[T] (500[M
X_Acq_Duration = 1.76422912[s]
X_Domain       = 1H
X_Freq         = 495.13191398[MHz]
X_Offset       = 5[ppm]
X_Points       = 16384
X_Prescans     = 1
X_Resolution   = 0.5668198[Hz]
X_Sweep        = 9.28677563[kHz]
X_Sweep_Clippped = 7.42942051[kHz]
Irr_Domain     = Proton
Irr_Freq       = 495.13191398[MHz]
Irr_Offset     = 5[ppm]
Tri_Domain     = Proton
Tri_Freq       = 495.13191398[MHz]
Tri_Offset     = 5[ppm]
Clipped        = FALSE
Decimation_Reg = r : 1346( 1345), g : 52
Scans          = 8
Total_Scans    = 8

```

```

Relaxation_Delay = 5[s]
Recvr_Gain       = 56
Temp_Get         = 21.8[dC]
X_90_Width      = 7.12[us]
X_Acq_Time      = 1.76422912[s]
X_Angle         = 45[deg]
X_Atn           = 3.3[dB]
X_Pulse         = 3.56[us]
Irr_Mode        = Off
Tri_Mode        = Off
Comment_1       = *** Pulse ***
Comment_111    = *** presat time ***
Comment_201    = *** obs_dante presatu
Comment_202    = *** irr_preaturation
Comment_203    = *** tri_preaturation

```

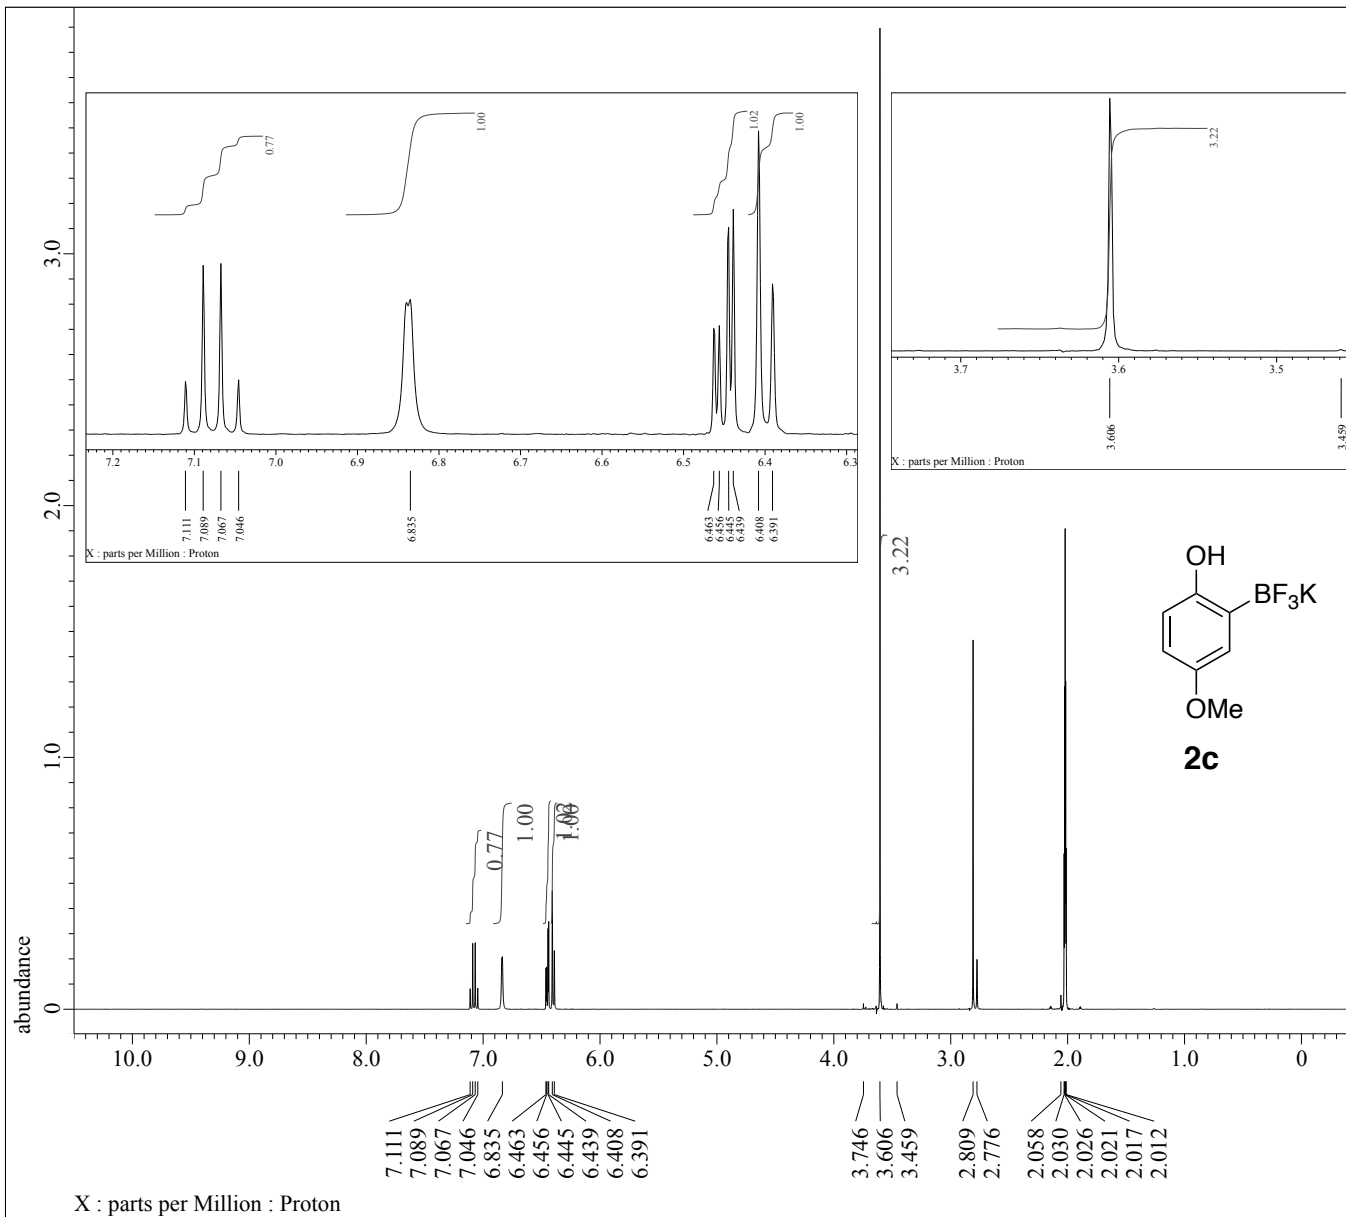

```

---- PROCESSING PARAMETERS ----
sexp( 0.2[Hz], 0.0[s] )
trapezoid( 0[%], 0[%], 80[%], 100[%] )
zerofill( 1 )
fft( 1, TRUE, TRUE )
machinephase
ppm
phase( 0, -25, 69.64533[%] )
base_correct( None, 0, Smooth )

```

以下に由来 : YH-88 (CF3)\_Proton-1-1.jdf

```

Filename      = YH-88 (CF3)_Proton-1-8
Author        = delta
Experiment    = proton.jxp
Sample_Id     = YH-88 (CF3)
Solvent       = ACETONE-D6
Creation_Time = 22-FEB-2020 13:29:51
Revision_Time = 9-MAR-2020 13:08:30
Current_Time  = 9-MAR-2020 13:09:10

Comment       = single pulse
Data Format   = 1D REAL
Dim Size     = 104858
Dim Title    = Proton
Dim Units    = [ppm]
Dimensions   = X
Spectrometer = JNM-ECZ500R/s1

Field Strength = 11.62926421[T] (500[M]
X_Acq_Duration = 14.11383296[s]
X_Domain       = 1H
X_Freq        = 495.13191398[MHz]
X_Offset      = 5[ppm]
X_Points      = 131072
X_Prescans    = 1
X_Resolution  = 70.85247522[mHz]
X_Sweep       = 9.28677563[kHz]
X_Sweep_Clip  = 7.42942051[kHz]
Irr_Domain    = Proton
Irr_Freq      = 495.13191398[MHz]
Irr_Offset    = 5[ppm]
Tri_Domain    = Proton
Tri_Freq      = 495.13191398[MHz]
Tri_Offset    = 5[ppm]
Clipped       = FALSE
Decimation_Reg = r: 1346( 1345),g: 52
Scans         = 8
Total_Scans   = 8

Relaxation_Delay = 3[s]
Recvr Gain       = 66
Temp_Get        = 21.9[dC]
X_90_Width     = 7.12[us]
X_Acq_Time     = 14.11383296[s]
X_Angle        = 45[deg]
X_Atn          = 3.3[dB]
X_Pulse        = 3.56[us]
Irr_Mode       = Off
Tri_Mode       = Off
Comment_1      = *** Pulse ***
Comment_111    = *** presat time ***
Comment_201    = *** obs_dante presatu
Comment_202    = *** irr_preaturation
Comment_203    = *** tri_preaturation

```

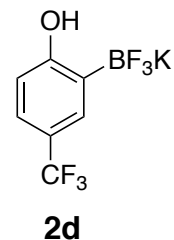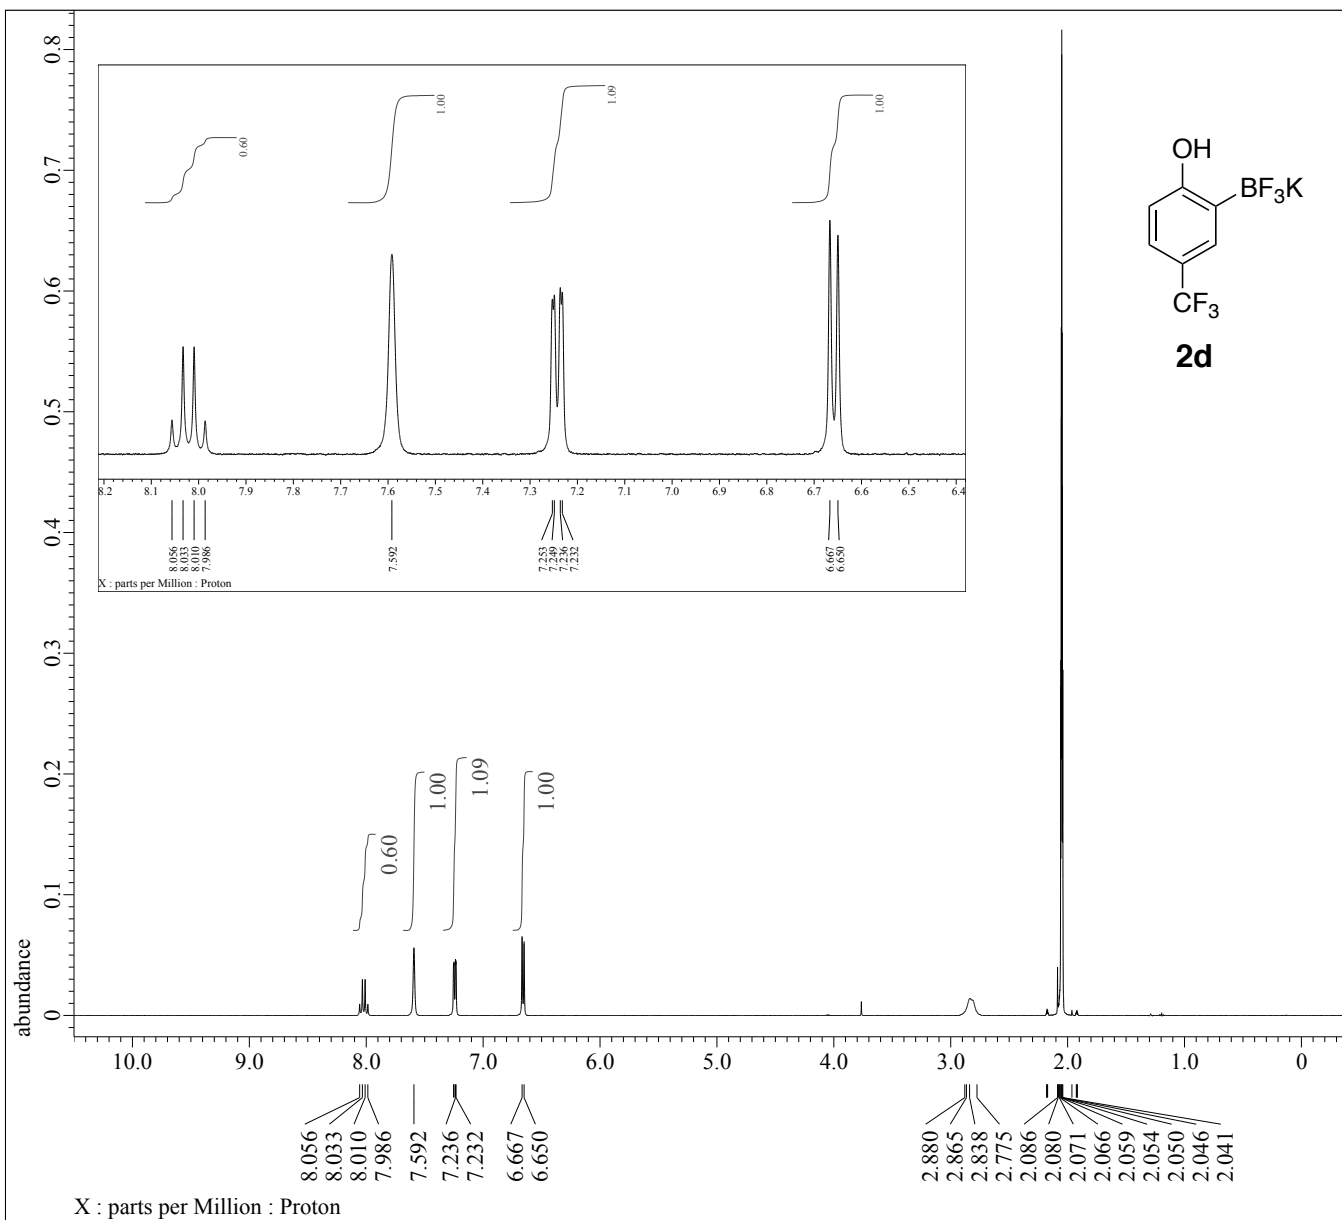



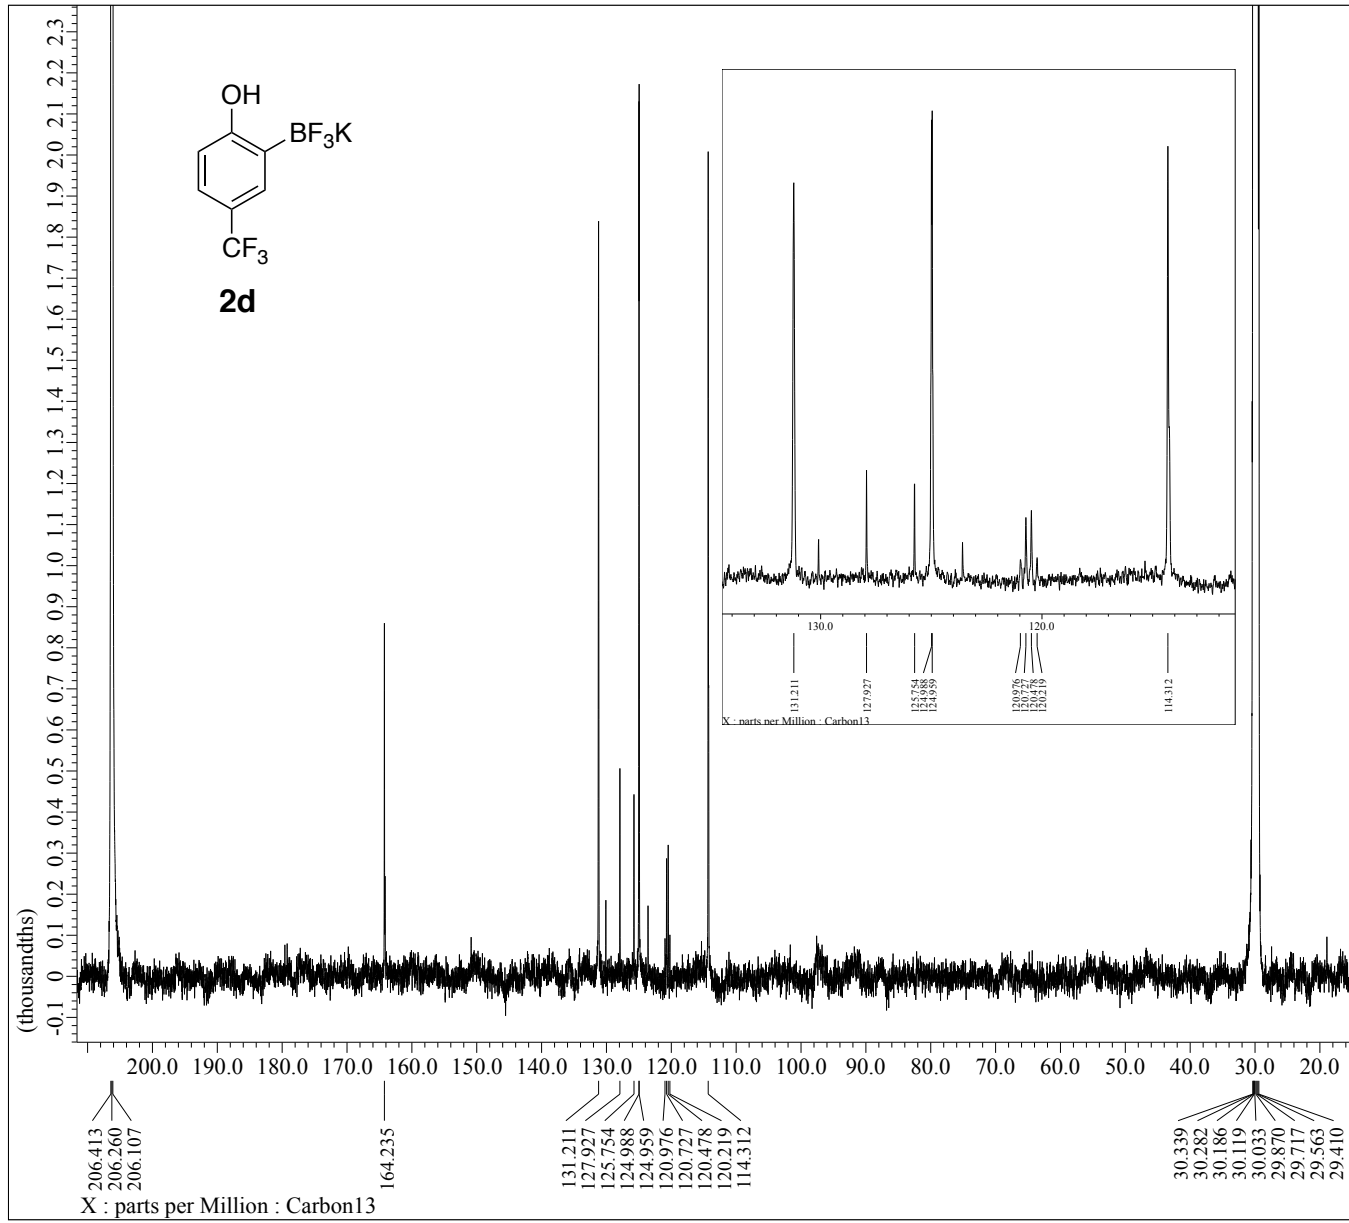

```

---- PROCESSING PARAMETERS ----
sexp( 2.0[Hz], 0.0[s] )
trapezoid( 0[%], 0[%], 80[%], 100[%] )
zerofill( 1, TRUE )
fft( 1, TRUE, TRUE )
machinephase
ppm
base_correct( Akima, 5, 0, FALSE, 3, None, FA
Derived from: YH(p-CF3)_Carbon-1-1.jdf

```

```

Filename      = YH(p-CF3)_Carbon-1
Author        = delta
Experiment    = carbon.jxp
Sample_Id     = YH(p-CF3)
Solvent       = ACETONE-D6
Actual_Start_Time = 8-APR-2020 00:58:
Revision_Time  = 9-APR-2020 14:12:

```

```

Comment       = single pulse decou
Data Format    = 1D REAL
Dim_Size      = 26214
X_Domain      = Carbon13
Dim_Title     = Carbon13
Dim_Units     = [ppm]
Dimensions    = X
Spectrometer  = JNM-ECZ500R/S1

```

```

Field Strength = 11.62926421[T] (50
X_Acq_Duration = 0.8388608[s]
X_Domain        = 13C
X_Freq          = 124.5010059[MHz]
X_Offset        = 100[ppm]
X_Points        = 32768
X_Prescans      = 4
X_Resolution    = 1.1920929[Hz]
X_Sweep         = 39.0625[kHz]
X_Sweep_Clippped = 31.25[kHz]
Irr_Domain      = Proton
Irr_Freq        = 495.13191398[MHz]
Irr_Offset      = 5[ppm]
Clipped         = FALSE
Scans           = 10000
Total_Scans     = 10000

```

```

Relaxation_Delay = 2[s]
Recvr Gain       = 56
Temp_Get         = 20.7[dC]
X_90_Width       = 9.61[us]
X_Acq_Time       = 0.8388608[s]
X_Angle          = 30[deg]
X_Atn            = 10[dB]
X_Pulse          = 3.20333333[us]
Irr_Atn_Dec      = 23.948[dB]
Irr_Atn_Dec_Calc = 23.948[dB]
Irr_Atn_Dec_Default_Calc = 23.948[dB]
Irr_Atn_Noise    = 23.948[dB]
Irr_Dec_Bandwidth_Hz = 5.97826087[kHz]
Irr_Dec_Bandwidth_Ppm = 12.07407703[ppm]
Irr_Dec_Freq     = 495.13191398[MHz]
Irr_Dec_Merit_Factor = 2.2
Irr_Decoupling   = TRUE
Irr_Noise        = TRUE
Irr_Noise        = WALTZ

```

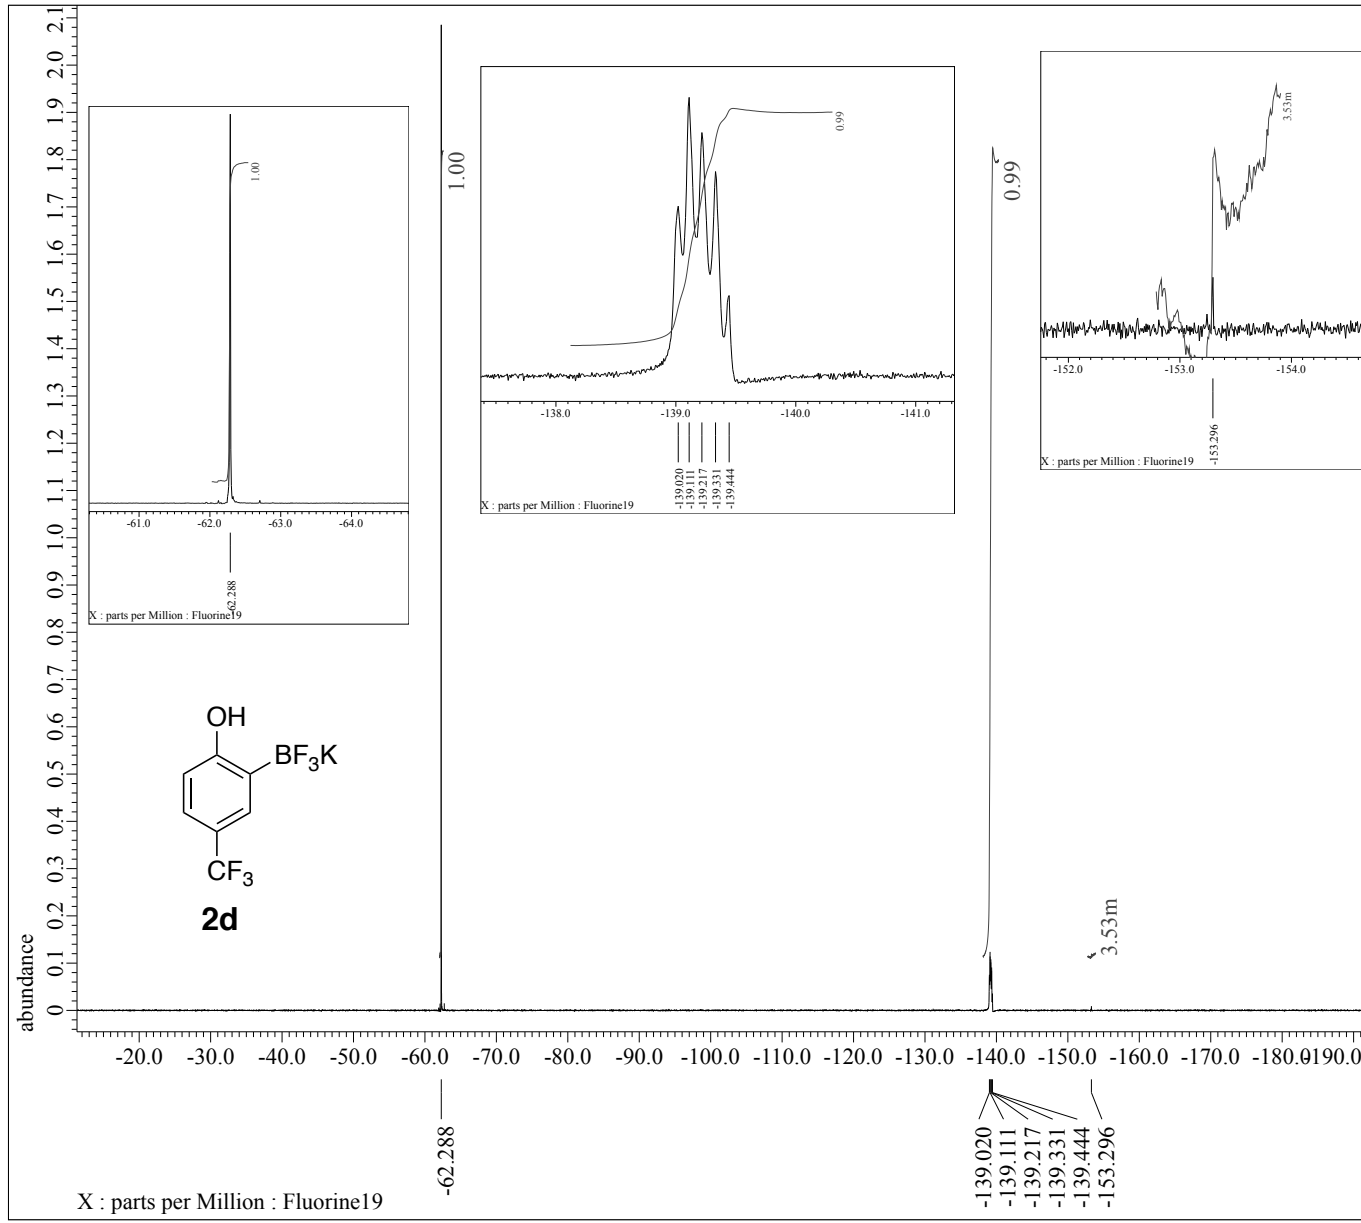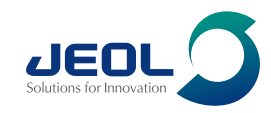

```

---- PROCESSING PARAMETERS ----
sexp( 0.2[Hz], 0.0[s] )
trapezoid( 0[%], 0[%], 80[%], 100[%] )
zerofill( 1 )
fft( 1, TRUE, TRUE )
machinephase
ppm
base_correct( None, 0, Smooth )
以下に由来 : YH-88 (CF3)_19F-1-1.jdf

```

```

Filename      = YH-88 (CF3)_19F-1-7.jd
Author       = delta
Experiment   = single pulse.jxp
Sample Id    = YH-88 (CF3)
Solvent      = ACETONE-D6
Creation Time = 22-FEB-2020 13:34:20
Revision Time = 22-FEB-2020 19:15:30
Current Time  = 22-FEB-2020 19:17:31

```

```

Comment      = single pulse
Data Format   = 1D REAL
Dim Size     = 26214
Dim Title    = Fluorine19
Dim Units    = [ppm]
Dimensions   = X
Spectrometer = JNM-ECZ500R/s1

```

```

Field Strength = 11.62926421[T] (500[M]
X Acq Duration = 0.28311552[s]
X Domain       = 19F
X Freq         = 465.88941346[MHz]
X Offset       = -100[ppm]
X Points       = 32768
X Prescans     = 1
X Resolution   = 3.5321271[Hz]
X Sweep        = 115.74074074[kHz]
X Sweep Clipped = 92.59259259[kHz]
Irr Domain     = Fluorine19
Irr Freq       = 465.88941346[MHz]
Irr Offset     = 5[ppm]
Tri Domain     = Fluorine19
Tri Freq       = 465.88941346[MHz]
Tri Offset     = 5[ppm]
Clipped        = FALSE
Decimation_Reg = r : 54 ( 53 ), g : 29
Scans          = 8
Total_Scans    = 8

```

```

Relaxation_Delay = 5[s]
Recvr Gain       = 56
Temp Get         = 21.9[dC]
X 90_Width       = 7.81[us]
X Acq Time       = 0.28311552[s]
X Angle          = 45[deg]
X Atn            = 3.7[dB]
X Pulse         = 3.905[us]
Irr Mode         = Off
Tri Mode         = Off
Comment 1       = *** Pulse ***
Comment 111     = *** presat time ***
Comment 201     = *** obs_dante presatu
Comment 202     = *** irr_preaturation
Comment 203     = *** tri_preaturation

```

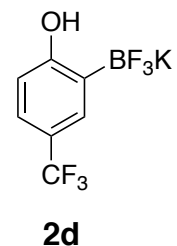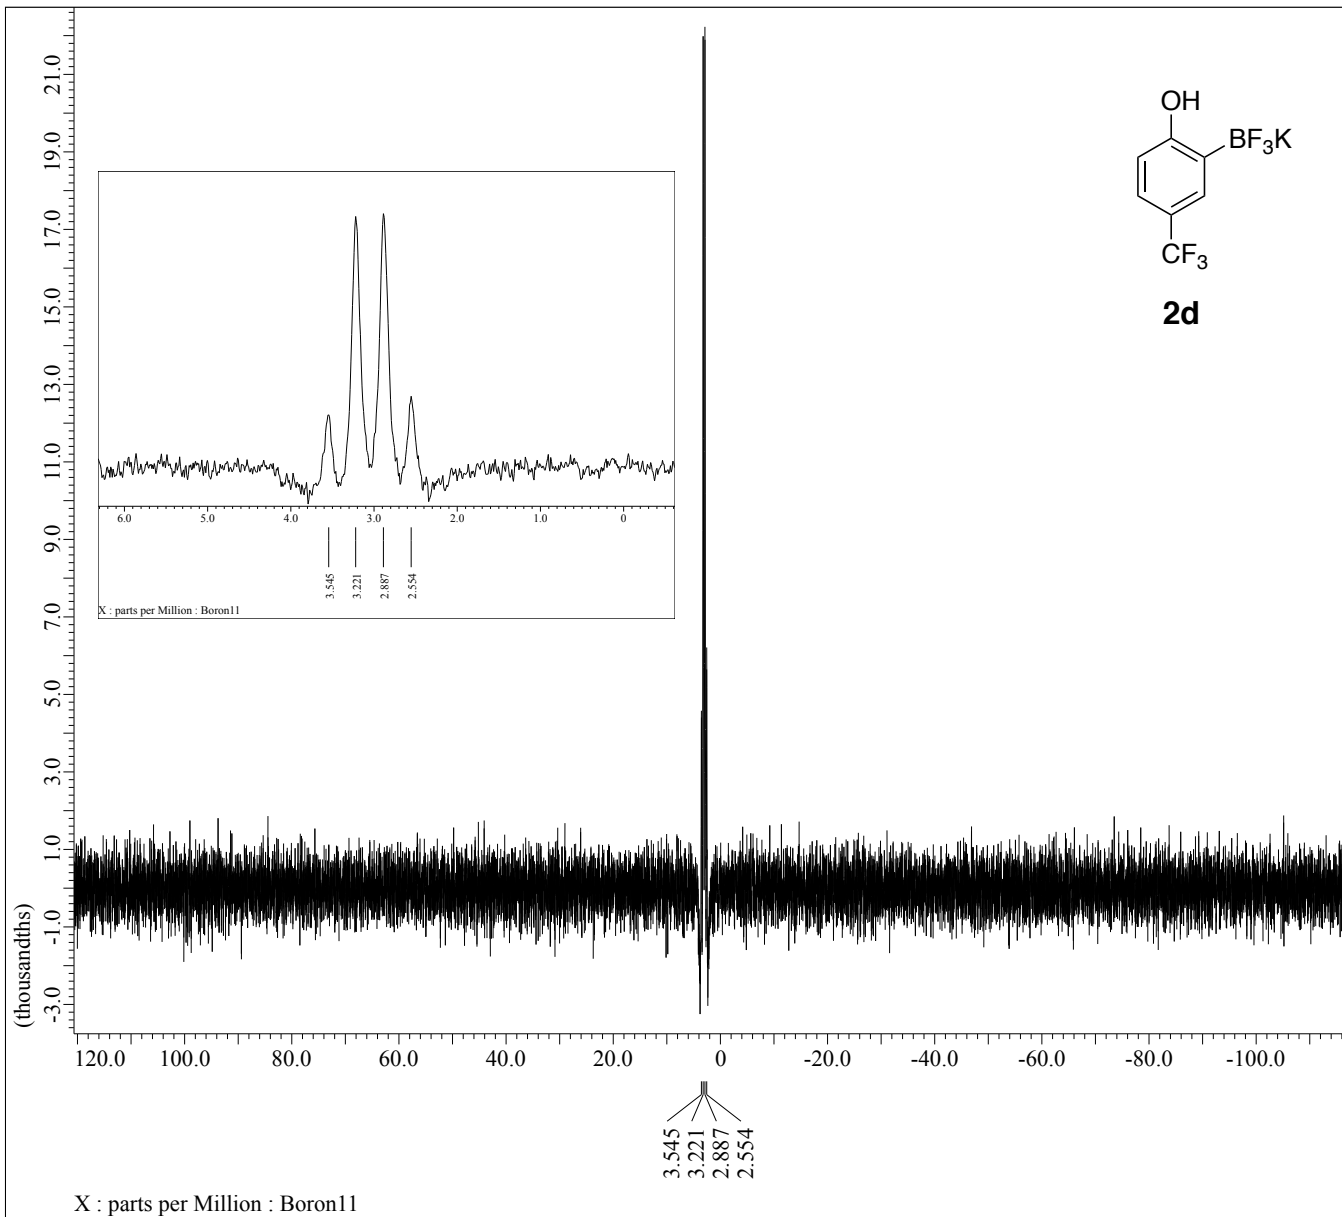

```

---- PROCESSING PARAMETERS ----
sexp( 2.0[Hz], 0.0[s] )
trapezoid( 0[%], 0[%], 80[%], 100[%] )
zerofill( 1 )
fft( 1, TRUE, TRUE )
machinephase
ppm
phase( 25.83806, 0, 50[%] )
phase( 4.18643, 0, 50[%] )
ibase_correct( , FALSE, FALSE )
base_correct( None, 0, Smooth )
phase( 1.1835, 0, 50[%] )

```

以下に由来 : YH-88 (CF3)\_11B\_1Hdec-1-1.jdf

```

Filename           = YH-88 (CF3)_11B_1Hd
Author             = delta
Experiment         = single_pulse_dec.j
Sample_Id          = YH-88 (CF3)
Solvent            = ACETONE-D6
Creation_Time      = 22-FEB-2020 13:38:
Revision_Time     = 9-MAR-2020 13:14:
Current_Time       = 9-MAR-2020 13:15:

Comment           = single pulse decou
Data Format        = 1D REAL
Dim Size          = 26214
Dim Title         = Boron11
Dim Units         = [ppm]
Dimensions        = X
Spectrometer      = JNM-ECZ500R/S1

Field Strength    = 11.62926421[T] (50
X_Acq_Duration   = 0.66060288[s]
X_Domain         = 11B
X_Freq           = 158.85814241[MHz]
X_Offset         = 0[ppm]
X_Points         = 32768
X_Prescans       = 4
X_Resolution     = 1.51376876[Hz]
X_Sweep          = 49.6031746[kHz]
X_Sweep_Clipped = 39.68253968[kHz]
Irr_Domain       = Proton
Irr_Freq         = 495.13191398[MHz]
Irr_Offset       = 5[ppm]
Clipped          = FALSE
Decimation_Reg   = r: 252( 251),g: 40
Scans            = 100
Total_Scans      = 100

Relaxation_Delay  = 2[s]
Recvr Gain        = 56
Temp_Get          = 22.6[dC]
X_90_Width       = 15.74[us]
X_Acq_Time       = 0.66060288[s]
X_Angle          = 30[deg]
X_Atn            = 10.4[dB]
X_Pulse          = 5.24666667[us]
Irr_Atn_Dec      = 26.4[dB]
Irr_Atn_Dec_Calc = 26.4[dB]
Irr_Atn_Dec_Default_Calc = 26.4[dB]
Irr_Atn_Noise    = 26.4[dB]
Irr_Dec_Bandwidth_Hz = 5.97826087[kHz]
Irr_Dec_Bandwidth_Ppm = 12.07407703[ppm]
Irr_Dec_Freq     = 495.13191398[MHz]
Irr_Dec_Merit_Factor = 2.2
Irr_Decoupling   = TRUE
Irr_Noise        = TRUE

```

```

---- PROCESSING PARAMETERS ----
sexp( 0.2[Hz], 0.0[s] )
trapezoid( 0[%], 0[%], 80[%], 100[%] )
zerofill( 1 )
fft( 1, TRUE, TRUE )
machinephase
ppm
phase( 6, -26, 69.3926[%] )
base_correct( None, 0, Smooth )
reference( 2.02113[ppm], 2.05[ppm] )

```

以下に由来: YH-189(p-F)\_Proton-1-1.jdf

```

Filename      = YH-189(p-F)_Proton-1-
Author        = delta
Experiment    = proton.jxp
Sample_Id     = YH-189(p-F)
Solvent       = ACETONE-D6
Creation_Time = 22-FEB-2020 16:27:38
Revision_Time = 9-MAR-2020 13:37:11
Current_Time  = 9-MAR-2020 13:37:42

```

```

Comment       = single pulse
Data Format    = 1D REAL
Dim Size      = 104858
Dim Title     = Proton
Dim Units     = [ppm]
Dimensions    = X
Spectrometer  = JNM-ECZ500R/s1

```

```

Field Strength = 11.62926421[T] (500[M]
X_Acq_Duration = 14.11383296[s]
X_Domain       = 1H
X_Freq         = 495.13191398[MHz]
X_Offset       = 5[ppm]
X_Points       = 131072
X_Prescans     = 1
X_Resolution   = 70.85247522[mHz]
X_Sweep        = 9.28677563[kHz]
X_Sweep_Clippped = 7.42942051[kHz]
Irr_Domain     = Proton
Irr_Freq       = 495.13191398[MHz]
Irr_Offset     = 5[ppm]
Tri_Domain     = Proton
Tri_Freq       = 495.13191398[MHz]
Tri_Offset     = 5[ppm]
Clipped        = FALSE
Decimation_Reg = r: 1346( 1345),g: 52
Scans          = 8
Total_Scans    = 8

```

```

Relaxation_Delay = 3[s]
Recvr Gain       = 56
Temp_Get         = 21.9[dC]
X_90_Width       = 7.12[us]
X_Acq_Time       = 14.11383296[s]
X_Angle          = 45[deg]
X_Atn            = 3.3[dB]
X_Pulse          = 3.56[us]
Irr_Mode         = Off
Tri_Mode         = Off
Comment_1        = *** Pulse ***
Comment_111     = *** presat time ***
Comment_201     = *** obs_dante presatu
Comment_202     = *** irr_ preaturation
Comment_203     = *** tri_ preaturation

```

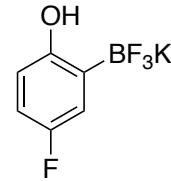

2e

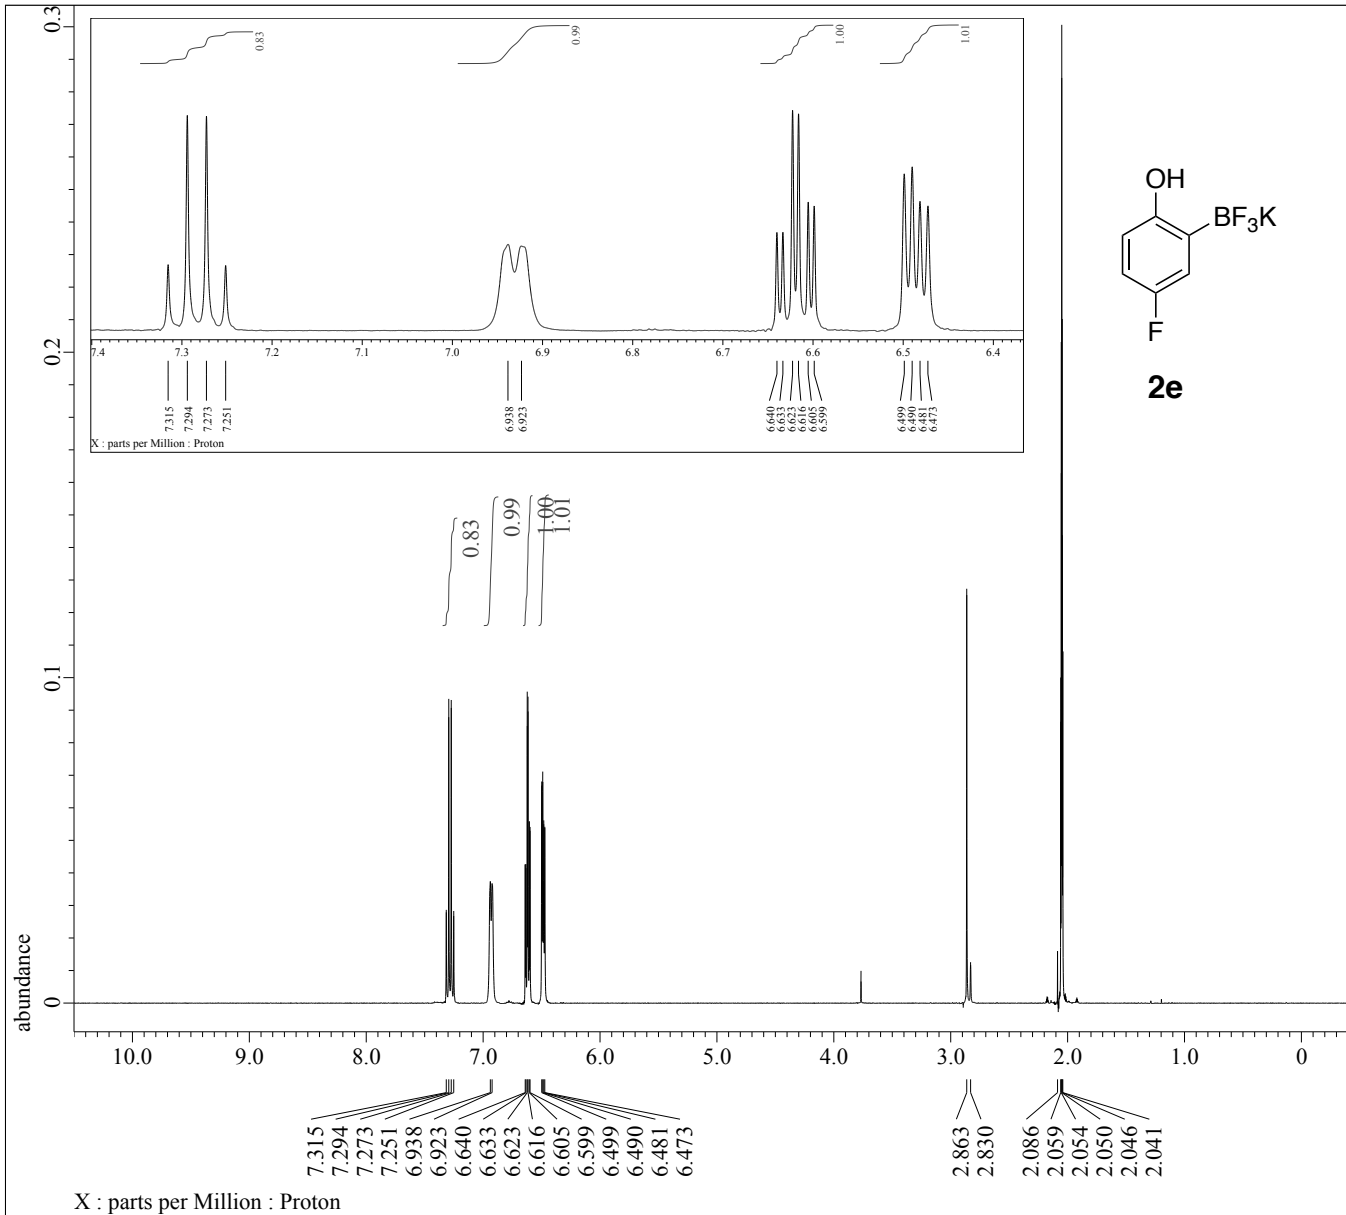

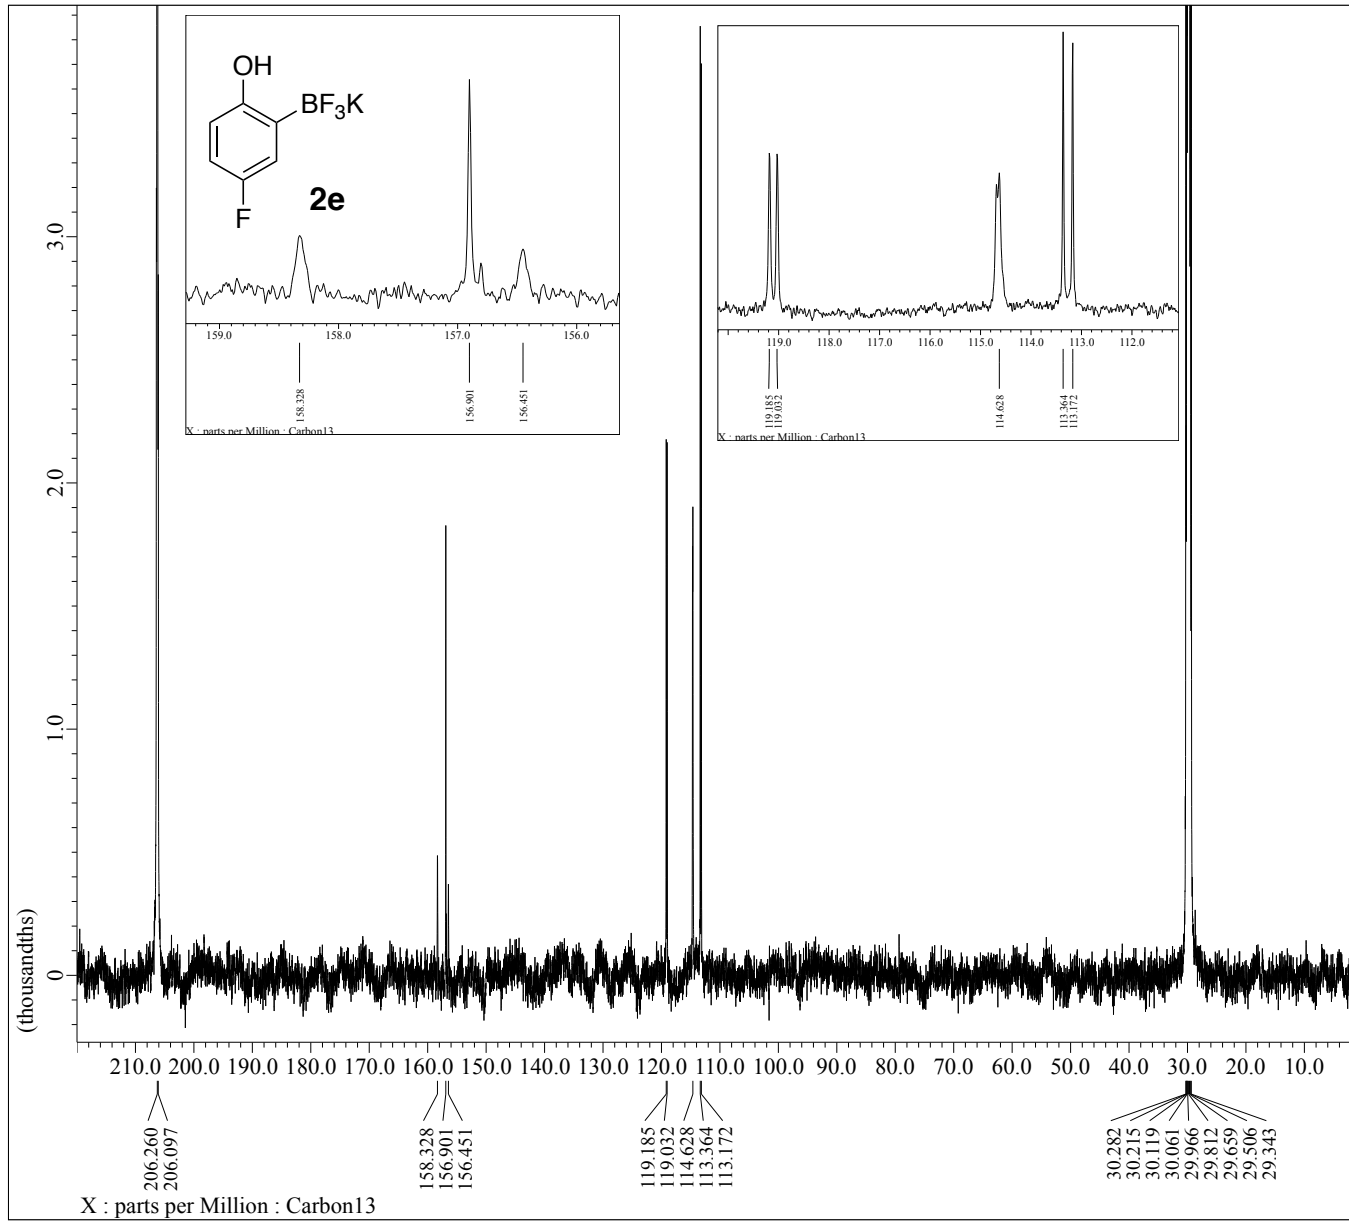

```

---- PROCESSING PARAMETERS ----
sexp( 2.0[Hz], 0.0[s] )
trapezoid( 0[%], 0[%], 80[%], 100[%] )
zerofill( 1, TRUE )
fft( 1, TRUE, TRUE )
machinephase
ppm
phase( 3, 7, 7.81673[%] )
base_correct( Akima, 5, 0, FALSE, 3, None, FA
Derived from: YH-189 (p-F)_Carbon-1-1.jdf

```

```

Filename      = YH-189 (p-F)_Carbon
Author       = delta
Experiment   = carbon.jxp
Sample Id    = YH-189 (p-F)
Solvent      = ACETONE-D6
Actual_Start_Time = 25-FEB-2020 06:03:
Revision_Time   = 9-APR-2020 14:27:

Comment      = single pulse decou
Data Format   = 1D REAL
Dim Size     = 26214
X Domain     = Carbon13
Dim Title    = Carbon13
Dim Units    = [ppm]
Dimensions   = X
Spectrometer = JNM-ECZ500R/S1

Field Strength = 11.62926421[T] (50
X Acq Duration = 0.8388608[s]
X Domain       = 13C
X Freq         = 124.5010059[MHz]
X Offset       = 100[ppm]
X Points       = 32768
X Prescans     = 4
X Resolution   = 1.1920929[Hz]
X Sweep        = 39.0625[kHz]
X Sweep Clipped = 31.25[kHz]
Irr Domain     = Proton
Irr Freq       = 495.13191398[MHz]
Irr Offset     = 5[ppm]
Clipped        = FALSE
Scans          = 5000
Total_Scans    = 5000

Relaxation_Delay = 2[s]
Recvr Gain       = 56
Temp_Get         = 22.2[dC]
X 90 Width      = 13.48[us]
X Acq Time      = 0.8388608[s]
X Angle         = 30[deg]
X Atn           = 11[dB]
X Pulse         = 4.49333333[us]
Irr Atn Dec     = 26.4[dB]
Irr Atn Dec Calc = 26.4[dB]
Irr Atn Dec Default_Calc = 26.4[dB]
Irr Atn Noe     = 26.4[dB]
Irr Dec Bandwidth_Hz = 5.97826087[kHz]
Irr Dec Bandwidth_Ppm = 12.07407703[ppm]
Irr Dec Freq    = 495.13191398[MHz]
Irr Dec Merit Factor = 2.2
Irr Decoupling = TRUE
Irr Noe         = TRUE
Irr Noise       = WALTZ

```

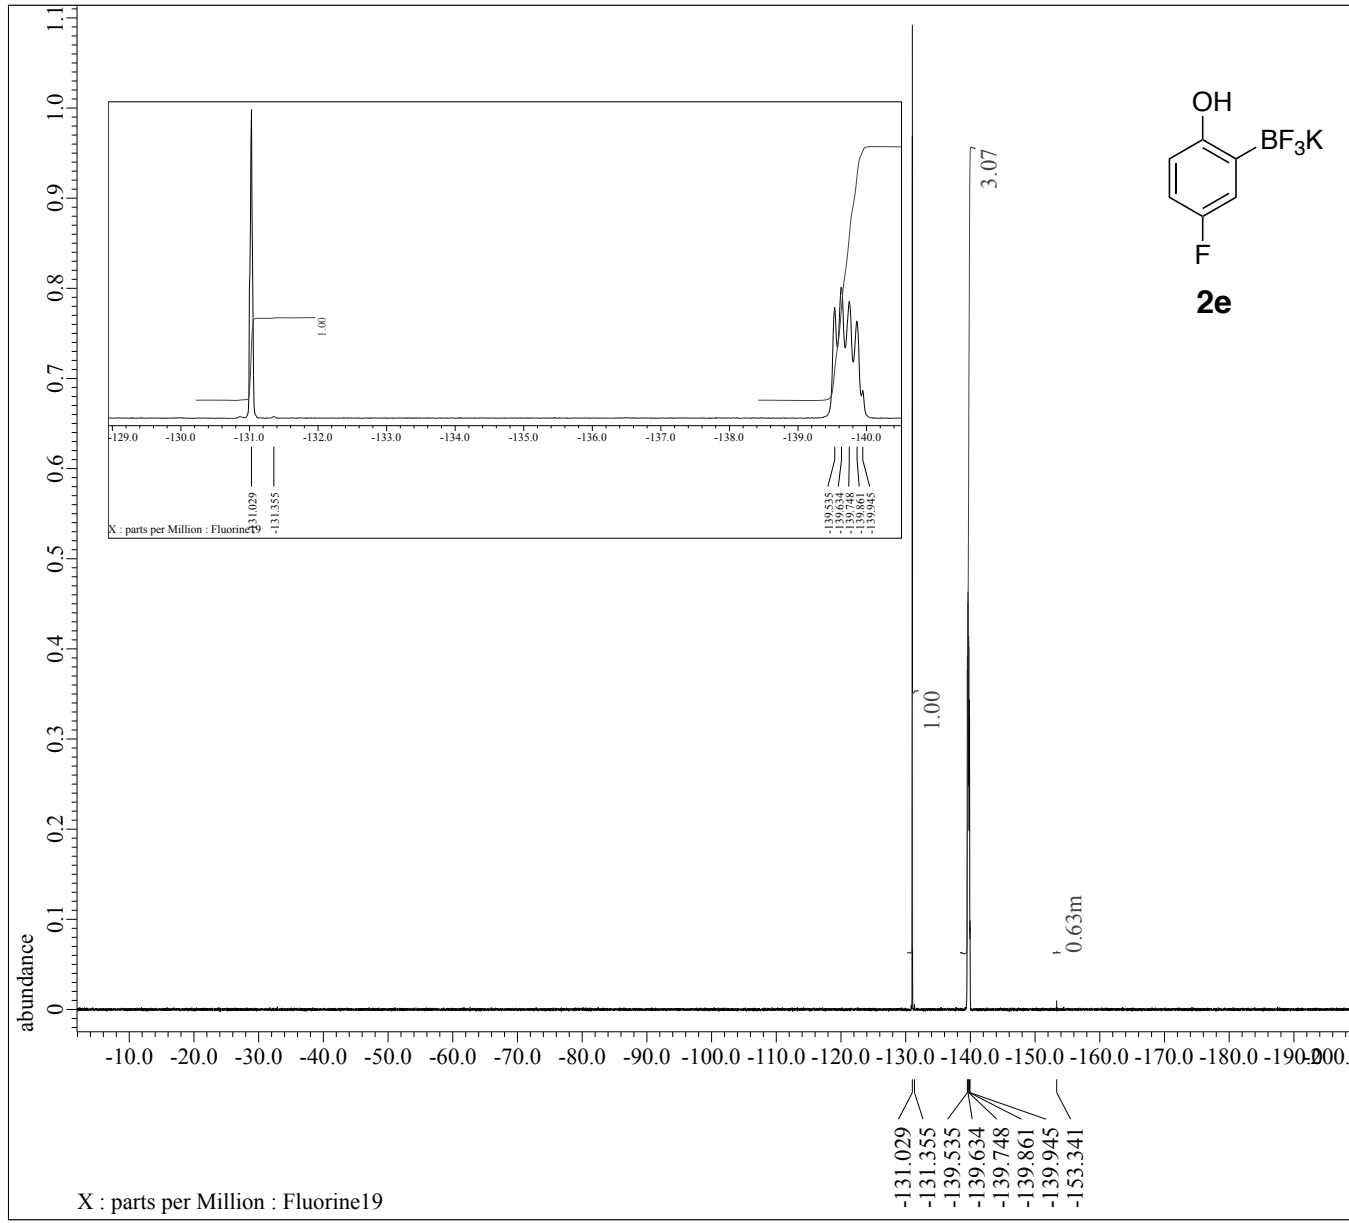

---- PROCESSING PARAMETERS ----  
 sexp( 0.2[Hz], 0.0[s] )  
 trapezoid( 0[%], 0[%], 80[%], 100[%] )  
 zerofill( 1 )  
 fft( 1, TRUE, TRUE )  
 machinephase  
 ppm  
 phase( -1.25, -21, 64.94487[%] )  
 base\_correct( None, 0, Smooth )  
 以下に由来 : YH-189(p-F)\_19F-1-1.jdf

Filename = YH-189(p-F)\_19F-1-12.  
 Author = delta  
 Experiment = single\_pulse.jxp  
 Sample\_Id = YH-189(p-F)  
 Solvent = ACETONE-D6  
 Creation\_Time = 22-FEB-2020 16:34:26  
 Revision\_Time = 7-MAR-2020 16:49:36  
 Current\_Time = 7-MAR-2020 16:50:05

Comment = single\_pulse  
 Data\_Format = 1D\_REAL  
 Dim\_Size = 26214  
 Dim\_Title = Fluorine19  
 Dim\_Units = [ppm]  
 Dimensions = X  
 Spectrometer = JNM-ECZ500R/s1

Field\_Strength = 11.62926421[T] (500[M]  
 X\_Acq\_Duration = 0.28311552[s]  
 X\_Domain = 19F  
 X\_Freq = 465.88941346[MHz]  
 X\_Offset = -100[ppm]  
 X\_Points = 32768  
 X\_Prescans = 1  
 X\_Resolution = 3.5321271[Hz]  
 X\_Sweep = 115.74074074[kHz]  
 X\_Sweep\_Clippped = 92.59259259[kHz]  
 Irr\_Domain = Fluorine19  
 Irr\_Freq = 465.88941346[MHz]  
 Irr\_Offset = 5[ppm]  
 Tri\_Domain = Fluorine19  
 Tri\_Freq = 465.88941346[MHz]  
 Tri\_Offset = 5[ppm]  
 Clipped = FALSE  
 Decimation\_Reg = r: 54( 53),g: 29  
 Scans = 8  
 Total\_Scans = 8

Relaxation\_Delay = 5[s]  
 Recvr\_Gain = 56  
 Temp\_Get = 21.9[dC]  
 X\_90\_Width = 7.81[us]  
 X\_Acq\_Time = 0.28311552[s]  
 X\_Angle = 45[deg]  
 X\_Atn = 3.7[dB]  
 X\_Pulse = 3.905[us]  
 Irr\_Mode = Off  
 Tri\_Mode = Off  
 Comment\_1 = \*\*\* Pulse \*\*\*  
 Comment\_111 = \*\*\* presat time \*\*\*  
 Comment\_201 = \*\*\* obs\_dante presatu  
 Comment\_202 = \*\*\* irr\_preaturation  
 Comment\_203 = \*\*\* tri\_preaturation

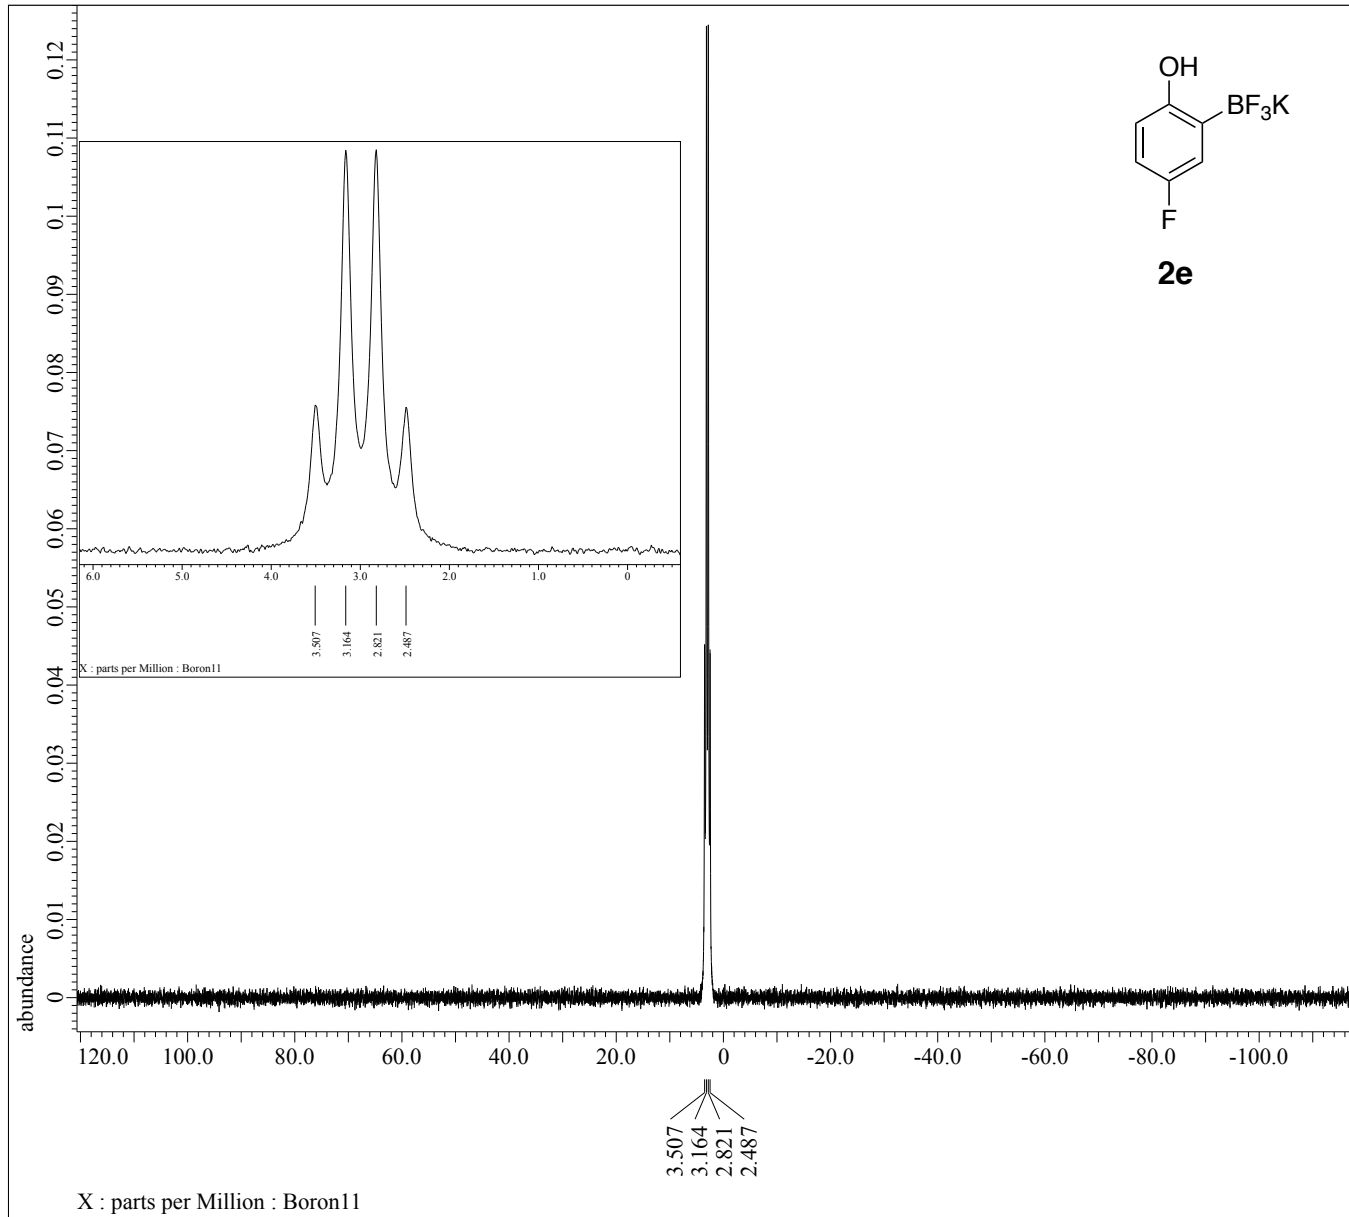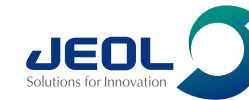

---- PROCESSING PARAMETERS ----  
 sexp( 2.0[Hz], 0.0[s] )  
 trapezoid( 0[%], 0[%], 80[%], 100[%] )  
 zerofill( 1 )  
 fft( 1, TRUE, TRUE )  
 machinephase  
 ppm  
 phase( 12.5, 0, 49.12448[%] )  
 base\_correct( None, 0, Smooth )  
 以下に由来 : YH-189(p-F)\_11B\_1Hdec-1-1.jdf

|                          |                      |
|--------------------------|----------------------|
| Filename                 | = YH-189(p-F)_11B_1H |
| Author                   | = delta              |
| Experiment               | = single_pulse_dec.j |
| Sample_Id                | = YH-189(p-F)        |
| Solvent                  | = ACETONE-D6         |
| Creation_Time            | = 22-FEB-2020 16:37: |
| Revision_Time            | = 9-MAR-2020 13:25:  |
| Current_Time             | = 9-MAR-2020 13:26:  |
| Comment                  | = single pulse decou |
| Data_Format              | = 1D_REAL            |
| Dim_Size                 | = 26214              |
| Dim_Title                | = Boron11            |
| Dim_Units                | = [ppm]              |
| Dimensions               | = X                  |
| Spectrometer             | = JNM-ECZ500R/S1     |
| Field_Strength           | = 11.62926421[T] (50 |
| X_Acq_Duration           | = 0.66060288[s]      |
| X_Domain                 | = 11B                |
| X_Freq                   | = 158.85814241[MHz]  |
| X_Offset                 | = 0[ppm]             |
| X_Points                 | = 32768              |
| X_Prescans               | = 4                  |
| X_Resolution             | = 1.51376876[Hz]     |
| X_Sweep                  | = 49.6031746[kHz]    |
| X_Sweep_Clippped         | = 39.68253968[kHz]   |
| Irr_Domain               | = Proton             |
| Irr_Freq                 | = 495.13191398[MHz]  |
| Irr_Offset               | = 5[ppm]             |
| Clipped                  | = FALSE              |
| Decimation_Reg           | = r: 252( 251),g: 40 |
| Scans                    | = 100                |
| Total_Scans              | = 100                |
| Relaxation_Delay         | = 2[s]               |
| Recvr_Gain               | = 56                 |
| Temp_Get                 | = 21.9[dC]           |
| X_90_Width               | = 15.74[us]          |
| X_Acq_Time               | = 0.66060288[s]      |
| X_Angle                  | = 30[deg]            |
| X_Atn                    | = 10.4[dB]           |
| X_Pulse                  | = 5.24666667[us]     |
| Irr_Atn_Dec              | = 26.4[dB]           |
| Irr_Atn_Dec_Calc         | = 26.4[dB]           |
| Irr_Atn_Dec_Default_Calc | = 26.4[dB]           |
| Irr_Atn_No               | = 26.4[dB]           |
| Irr_Dec_Bandwidth_Hz     | = 5.97826087[kHz]    |
| Irr_Dec_Bandwidth_Ppm    | = 12.07407703[ppm]   |
| Irr_Dec_Freq             | = 495.13191398[MHz]  |
| Irr_Dec_Merit_Factor     | = 2.2                |
| Irr_Decoupling           | = TRUE               |
| Irr_No                   | = TRUE               |

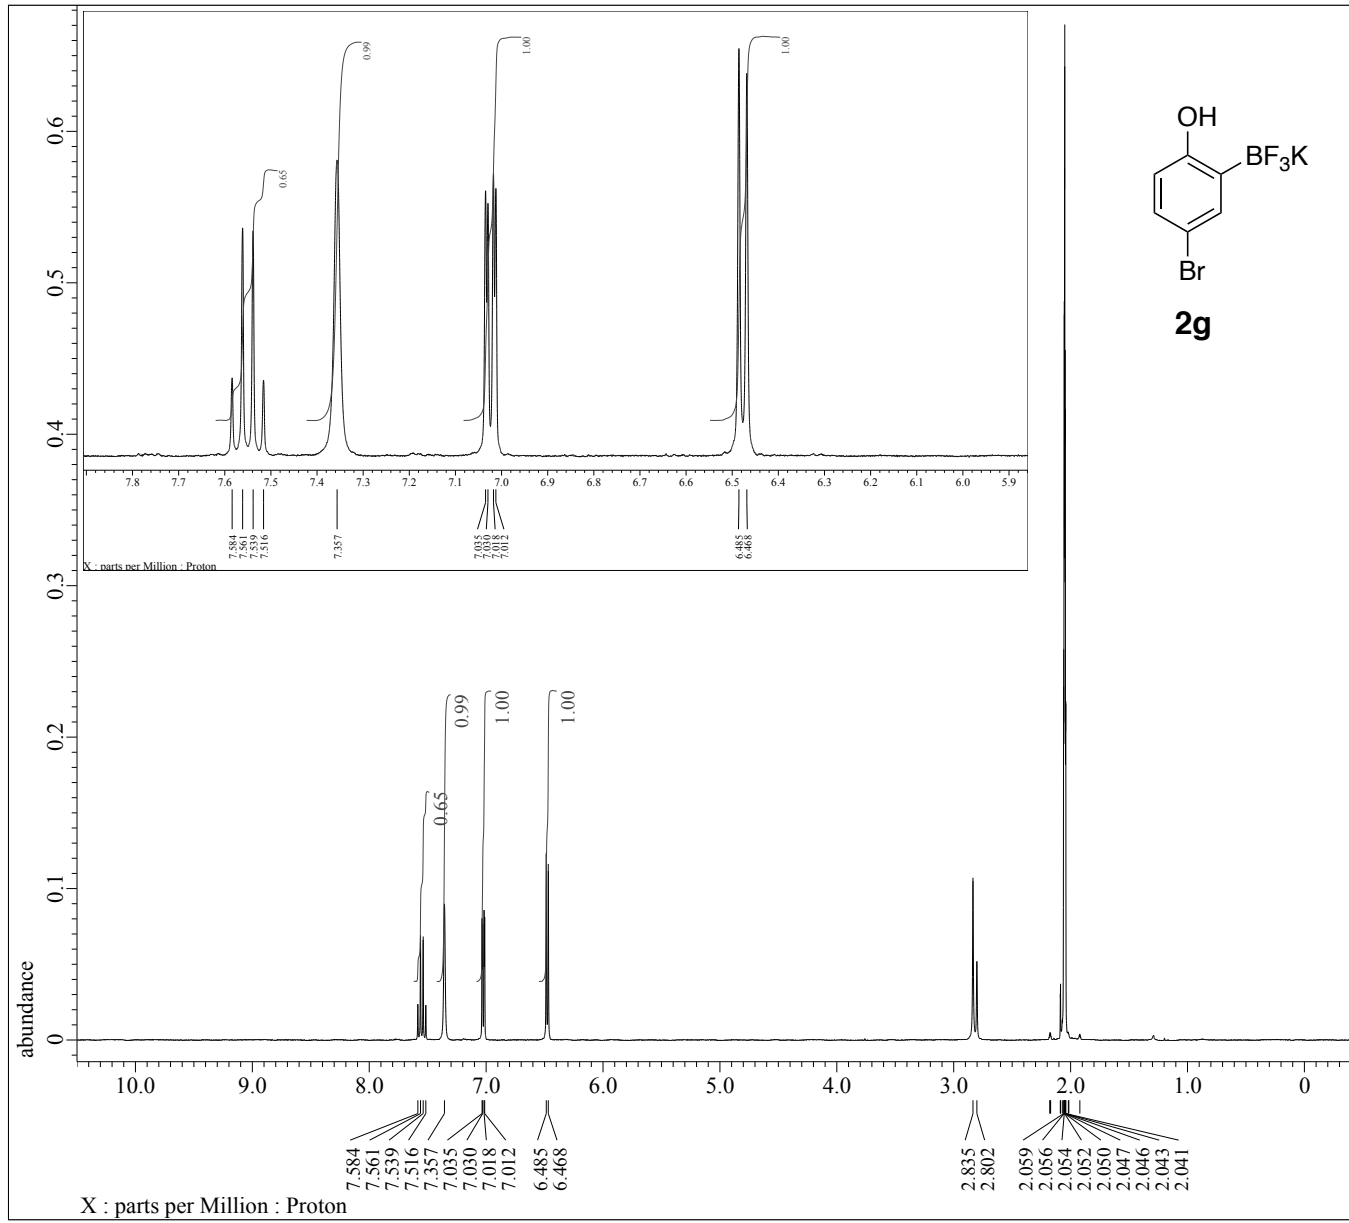

```

---- PROCESSING PARAMETERS ----
sexp( 0.2[Hz], 0.0[s] )
trapezoid( 0[%], 0[%], 80[%], 100[%] )
zerofill( 1, TRUE )
fft( 1, TRUE, TRUE )
machinephase
ppm
base_correct( Akima, 5, 0, FALSE, 3, None, FA
Derived from: YH-170-(p-Br)_Proton-1-1.jdf

```

```

Filename      = YH-170-(p-Br)_Proton-
Author       = delta
Experiment   = proton.jxp
Sample Id    = YH-170-(p-Br)
Solvent      = ACETONE-D6
Actual_Start_Time = 21-FEB-2020 18:30:09
Revision_Time   = 13-APR-2020 19:51:07

```

```

Comment      = single pulse
Data Format   = 1D REAL
Dim Size     = 104858
X Domain     = Proton
Dim Title    = Proton
Dim Units    = [ppm]
Dimensions   = X
Spectrometer = JNM-ECZ500R/s1

```

```

Field Strength = 11.62926421[T] (500[M]
X Acq Duration = 14.11383296[s]
X Domain       = 1H
X Freq         = 495.13191398[MHz]
X Offset       = 5[ppm]
X Points       = 131072
X Prescans     = 1
X Resolution   = 70.85247522[mHz]
X Sweep        = 9.28677563[kHz]
X Sweep Clipped = 7.42942051[kHz]
Irr Domain     = Proton
Irr Freq       = 495.13191398[MHz]
Irr Offset     = 5[ppm]
Tri Domain     = Proton
Tri Freq       = 495.13191398[MHz]
Tri Offset     = 5[ppm]
Clipped        = FALSE
Scans          = 8
Total_Scans    = 8

```

```

Relaxation_Delay = 3[s]
Recvr Gain       = 66
Temp_Get         = 21.9[dC]
X 90 Width      = 7.12[us]
X Acq Time       = 14.11383296[s]
X Angle          = 45[deg]
X Atn            = 3.3[dB]
X Pulse         = 3.56[us]
Irr Mode        = Off
Tri Mode        = Off
Dante Loop      = 299
Dante_Preset    = FALSE
Decimation Rate = 0
Initial_Wait    = 1[s]
Phase           = {0, 90, 270, 180, 180
Preset_Time     = 3[s]

```



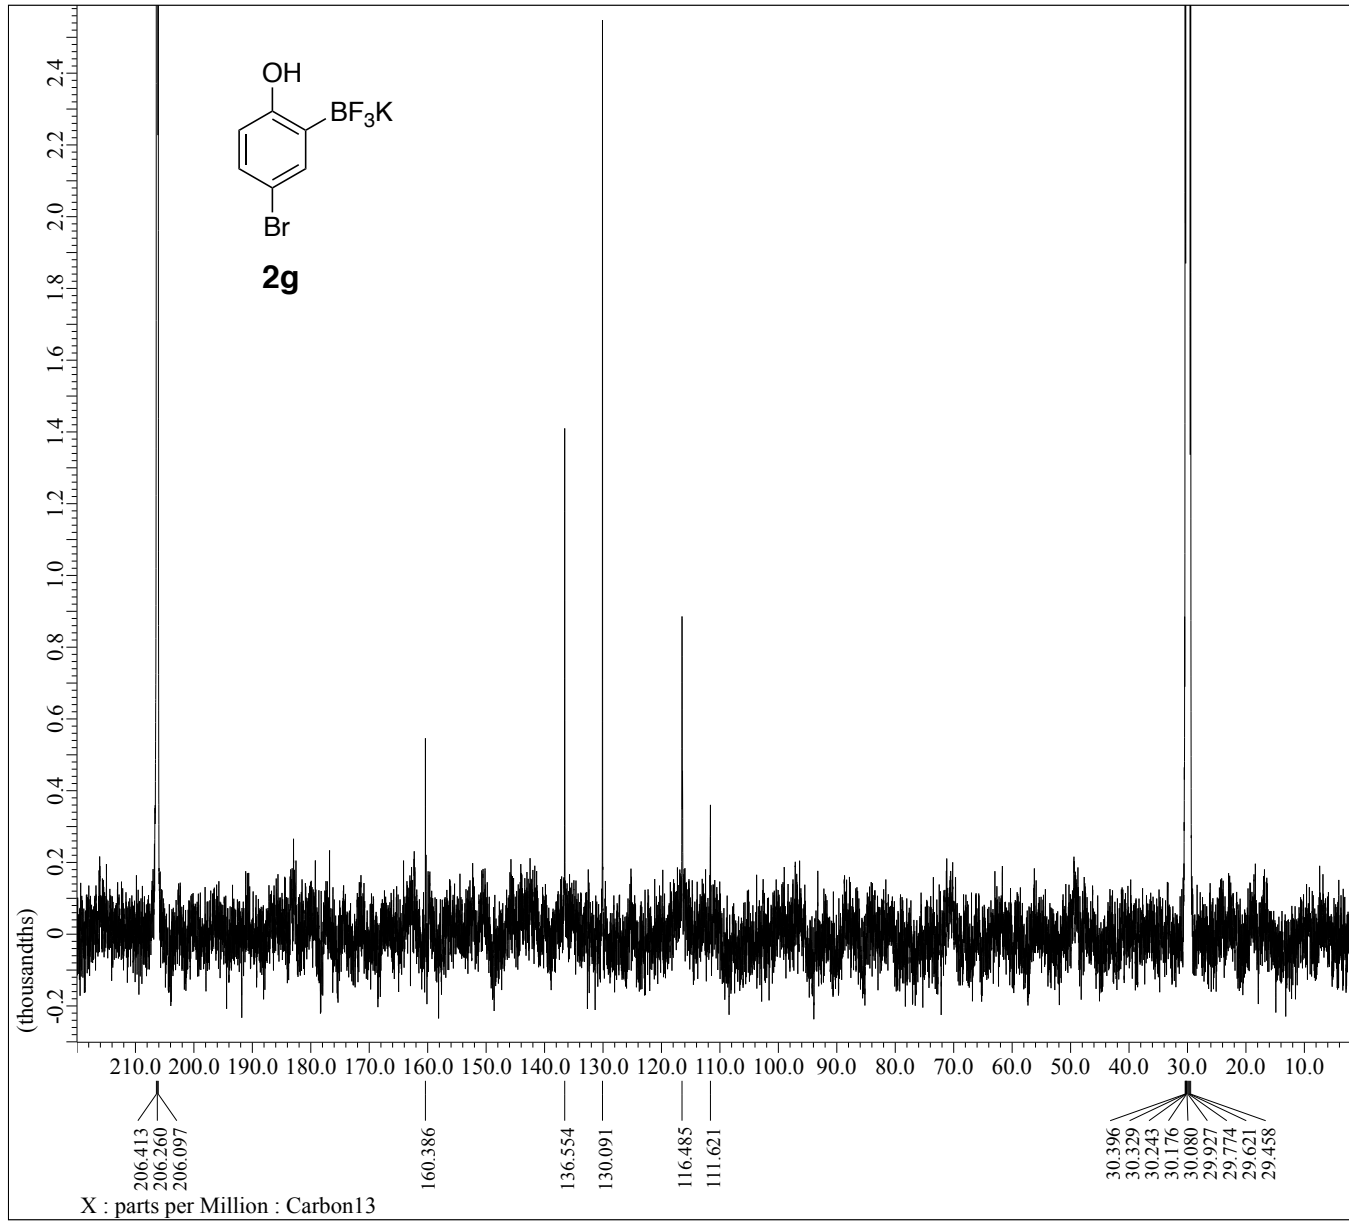

```

---- PROCESSING PARAMETERS ----
sexp( 2.0[Hz], 0.0[s] )
trapezoid( 0[%], 0[%], 80[%], 100[%] )
zerofill( 1, TRUE )
fft( 1, TRUE, TRUE )
machinephase
ppm
phase( 3, 6, 7.76714[%] )
base_correct( Akima, 5, 0, FALSE, 3, None, FA
Derived from: YH-170-(p-Br)_Carbon-1-1.jdf

```

```

Filename           = YH-170-(p-Br)_Carb
Author             = delta
Experiment         = carbon.jxp
Sample_Id          = YH-170-(p-Br)
Solvent            = ACETONE-D6
Actual_Start_Time  = 22-FEB-2020 00:05:
Revision_Time      = 9-APR-2020 14:25:

Comment           = single pulse decou
Data_Format       = 1D REAL
Dim_Size          = 26214
X_Domain          = Carbon13
Dim_Title         = Carbon13
Dim_Units         = [ppm]
Dimensions        = X
Spectrometer      = JNM-ECZ500R/S1

Field Strength    = 11.62926421[T] (50
X_Acq_Duration    = 0.8388608[s]
X_Domain          = 13C
X_Freq            = 124.5010059[MHz]
X_Offset          = 100[ppm]
X_Points          = 32768
X_Prescans        = 4
X_Resolution      = 1.1920929[Hz]
X_Sweep           = 39.0625[kHz]
X_Sweep_Clipped   = 31.25[kHz]
Irr_Domain        = Proton
Irr_Freq          = 495.13191398[MHz]
Irr_Offset        = 5[ppm]
Clipped           = FALSE
Scans             = 3000
Total_Scans       = 3000

Relaxation_Delay  = 2[s]
Recvr Gain        = 56
Temp_Get          = 22.4[dC]
X_90_Width        = 13.48[us]
X_Acq_Time        = 0.8388608[s]
X_Angle           = 30[deg]
X_Atn             = 11[dB]
X_Pulse           = 4.49333333[us]
Irr_Atn_Dec       = 26.4[dB]
Irr_Atn_Dec_Calc = 26.4[dB]
Irr_Atn_Dec_Default_Calc = 26.4[dB]
Irr_Atn_Noise    = 26.4[dB]
Irr_Dec_Bandwidth_Hz = 5.97826087[kHz]
Irr_Dec_Bandwidth_Ppm = 12.07407703[ppm]
Irr_Dec_Freq     = 495.13191398[MHz]
Irr_Dec_Merit_Factor = 2.2
Irr_Decoupling   = TRUE
Irr_Noise        = TRUE
Irr_Noise        = WALTZ

```

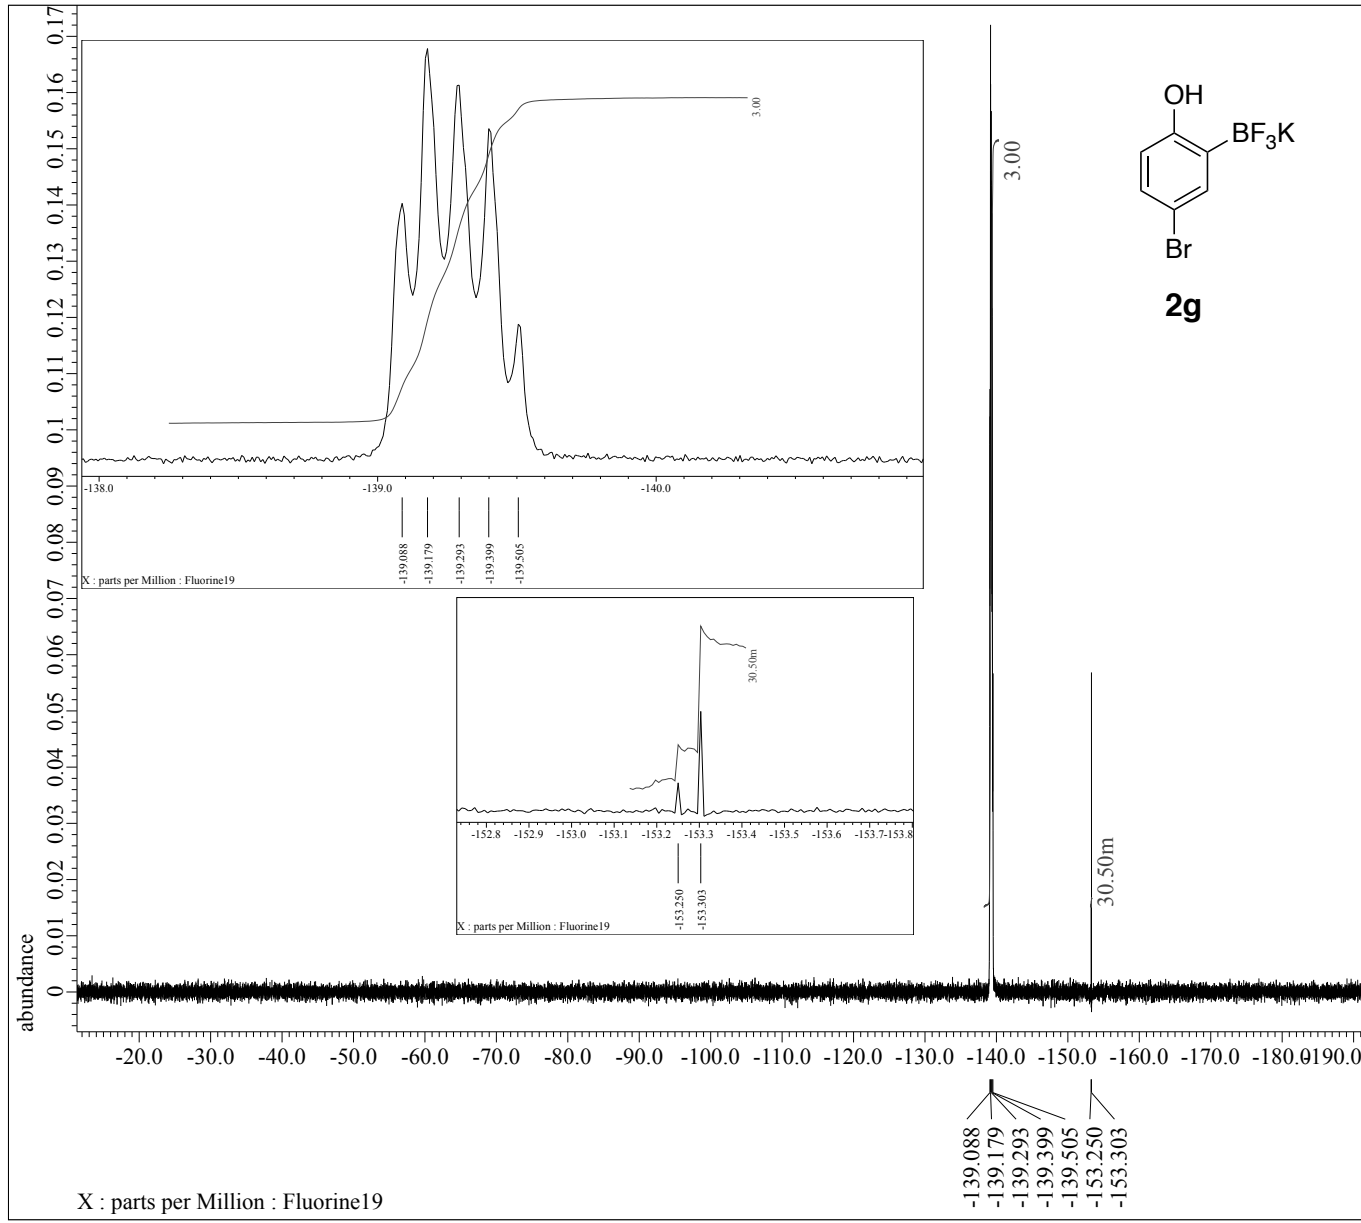

---- PROCESSING PARAMETERS ----  
 sexp( 0.2[Hz], 0.0[s] )  
 trapezoid( 0[%], 0[%], 80[%], 100[%] )  
 zerofill( 1 )  
 fft( 1, TRUE, TRUE )  
 machinephase  
 ppm  
 phase( -1.90826, 0, 50[%] )  
 base\_correct( None, 0, Smooth )  
 以下に由来 : YH-170-(p-Br)\_19F-1-1.jdf

|                  |                         |
|------------------|-------------------------|
| Filename         | = YH-170-(p-Br)_19F-1-1 |
| Author           | = delta                 |
| Experiment       | = single_pulse.jxp      |
| Sample_Id        | = YH-170-(p-Br)         |
| Solvent          | = ACETONE-D6            |
| Creation_Time    | = 21-FEB-2020 18:36:18  |
| Revision_Time    | = 22-FEB-2020 19:06:16  |
| Current_Time     | = 22-FEB-2020 19:06:53  |
| Comment          | = single_pulse          |
| Data_Format      | = 1D_REAL               |
| Dim_Size         | = 26214                 |
| Dim_Title        | = Fluorine19            |
| Dim_Units        | = [ppm]                 |
| Dimensions       | = X                     |
| Spectrometer     | = JNM-ECZ500R/s1        |
| Field_Strength   | = 11.62926421[T] (500[M |
| X_Acq_Duration   | = 0.28311552[s]         |
| X_Domain         | = 19F                   |
| X_Freq           | = 465.88941346[MHz]     |
| X_Offset         | = -100[ppm]             |
| X_Points         | = 32768                 |
| X_Prescans       | = 1                     |
| X_Resolution     | = 3.5321271[Hz]         |
| X_Sweep          | = 115.74074074[kHz]     |
| X_Sweep_Clippped | = 92.59259259[kHz]      |
| Irr_Domain       | = Fluorine19            |
| Irr_Freq         | = 465.88941346[MHz]     |
| Irr_Offset       | = 5[ppm]                |
| Tri_Domain       | = Fluorine19            |
| Tri_Freq         | = 465.88941346[MHz]     |
| Tri_Offset       | = 5[ppm]                |
| Clipped          | = FALSE                 |
| Decimation_Reg   | = r : 54 ( 53 ), g : 29 |
| Scans            | = 8                     |
| Total_Scans      | = 8                     |
| Relaxation_Delay | = 5[s]                  |
| Recvr_Gain       | = 56                    |
| Temp_Get         | = 21.8[dC]              |
| X_90_Width       | = 7.81[us]              |
| X_Acq_Time       | = 0.28311552[s]         |
| X_Angle          | = 45[deg]               |
| X_Atn            | = 3.7[dB]               |
| X_Pulse          | = 3.905[us]             |
| Irr_Mode         | = Off                   |
| Tri_Mode         | = Off                   |
| Comment_1        | = *** Pulse ***         |
| Comment_111      | = *** presat time ***   |
| Comment_201      | = *** obs_dante presatu |
| Comment_202      | = *** irr_preaturation  |
| Comment_203      | = *** tri_preaturation  |

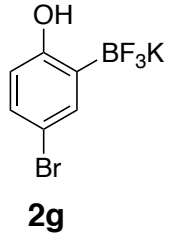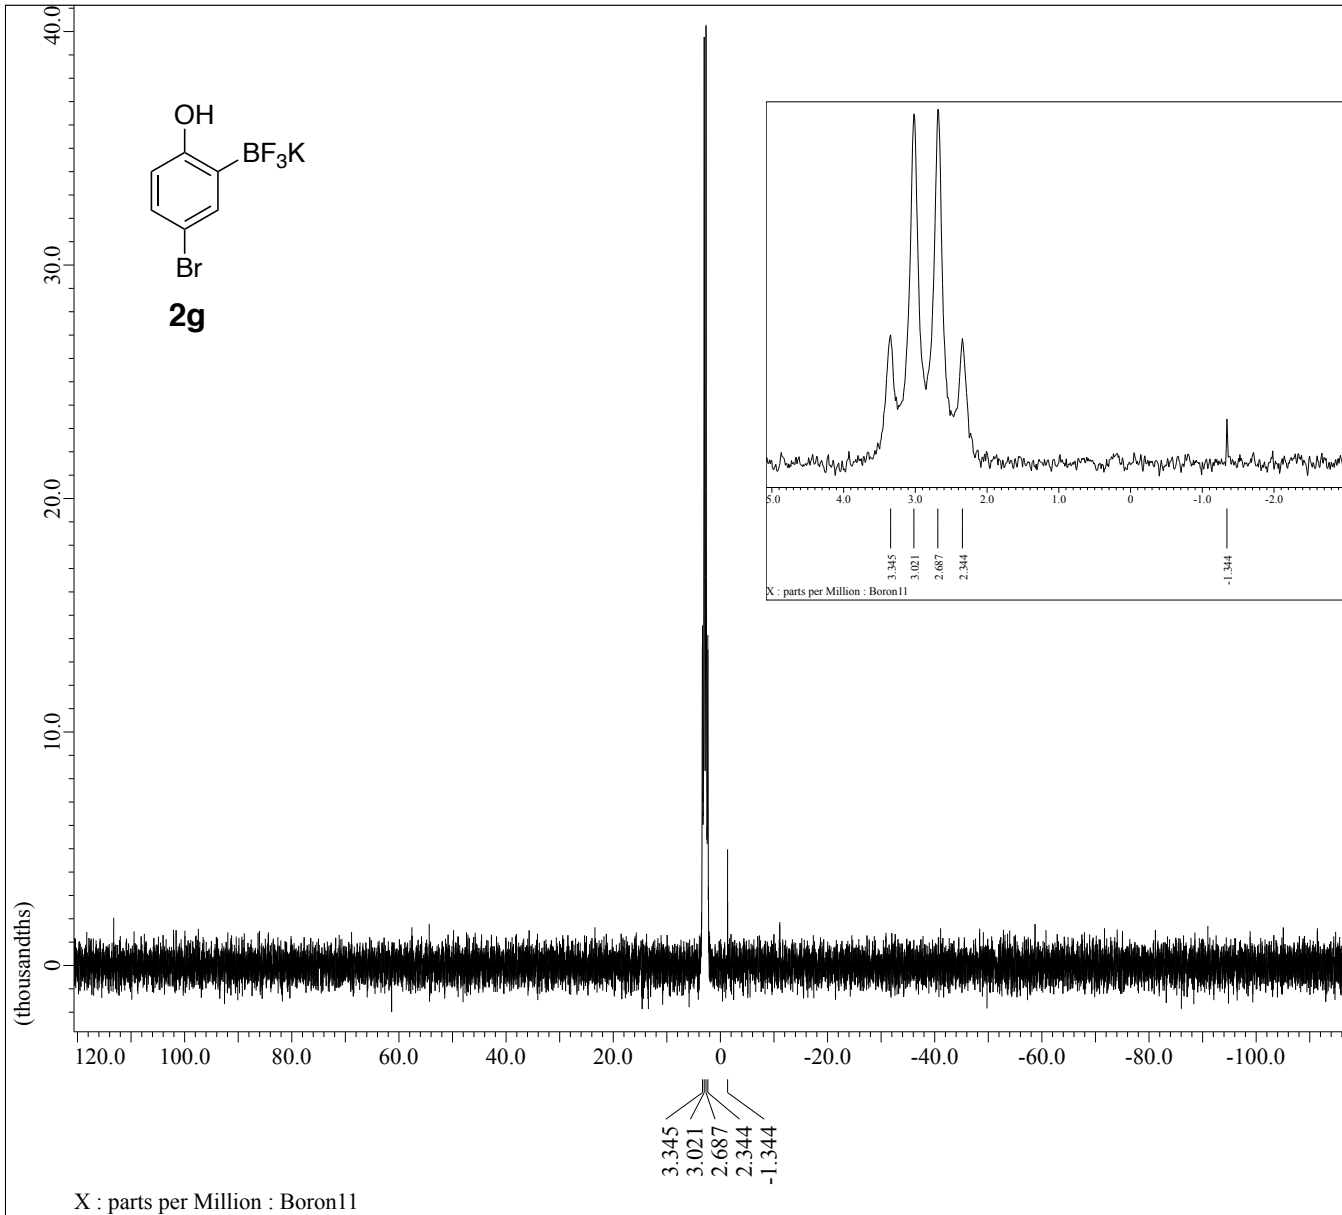

---- PROCESSING PARAMETERS ----  
 sexp( 2.0[Hz], 0.0[s] )  
 trapezoid( 0[%], 0[%], 80[%], 100[%] )  
 zerofill( 1 )  
 fft( 1, TRUE, TRUE )  
 machinephase  
 ppm  
 phase( 27.63086, 0, 50[%] )  
 base\_correct( None, 0, Smooth )  
 以下に由来 : YH-170-(p-Br)\_11B\_1Hdec-1-1.jdf

Filename = YH-170-(p-Br)\_11B\_  
 Author = delta  
 Experiment = single\_pulse\_dec.j  
 Sample\_Id = YH-170-(p-Br)  
 Solvent = ACETONE-D6  
 Creation\_Time = 21-FEB-2020 18:40:  
 Revision\_Time = 7-MAR-2020 15:07:  
 Current\_Time = 7-MAR-2020 15:08:  
 Comment = single\_pulse\_decou  
 Data\_Format = 1D\_REAL  
 Dim\_Size = 26214  
 Dim\_Title = Boron11  
 Dim\_Units = [ppm]  
 Dimensions = X  
 Spectrometer = JNM-ECZ500R/S1  
 Field\_Strength = 11.62926421[T] (50  
 X\_Acq\_Duration = 0.66060288[s]  
 X\_Domain = 11B  
 X\_Freq = 158.85814241[MHz]  
 X\_Offset = 0[ppm]  
 X\_Points = 32768  
 X\_Prescans = 4  
 X\_Resolution = 1.51376876[Hz]  
 X\_Sweep = 49.6031746[kHz]  
 X\_Sweep\_Clippped = 39.68253968[kHz]  
 Irr\_Domain = Proton  
 Irr\_Freq = 495.13191398[MHz]  
 Irr\_Offset = 5[ppm]  
 Clipped = FALSE  
 Decimation\_Reg = r: 252( 251),g: 40  
 Scans = 100  
 Total\_Scans = 100  
 Relaxation\_Delay = 2[s]  
 Recvr\_Gain = 56  
 Temp\_Get = 21.8[dC]  
 X\_90\_Width = 15.74[us]  
 X\_Acq\_Time = 0.66060288[s]  
 X\_Angle = 30[deg]  
 X\_Atn = 10.4[dB]  
 X\_Pulse = 5.24666667[us]  
 Irr\_Atn\_Dec = 26.4[dB]  
 Irr\_Atn\_Dec\_Calc = 26.4[dB]  
 Irr\_Atn\_Dec\_Default\_Calc = 26.4[dB]  
 Irr\_Atn\_No = 26.4[dB]  
 Irr\_Dec\_Bandwidth\_Hz = 5.97826087[kHz]  
 Irr\_Dec\_Bandwidth\_Ppm = 12.07407703[ppm]  
 Irr\_Dec\_Freq = 495.13191398[MHz]  
 Irr\_Dec\_Merit\_Factor = 2.2  
 Irr\_Decoupling = TRUE  
 Irr\_No = TRUE

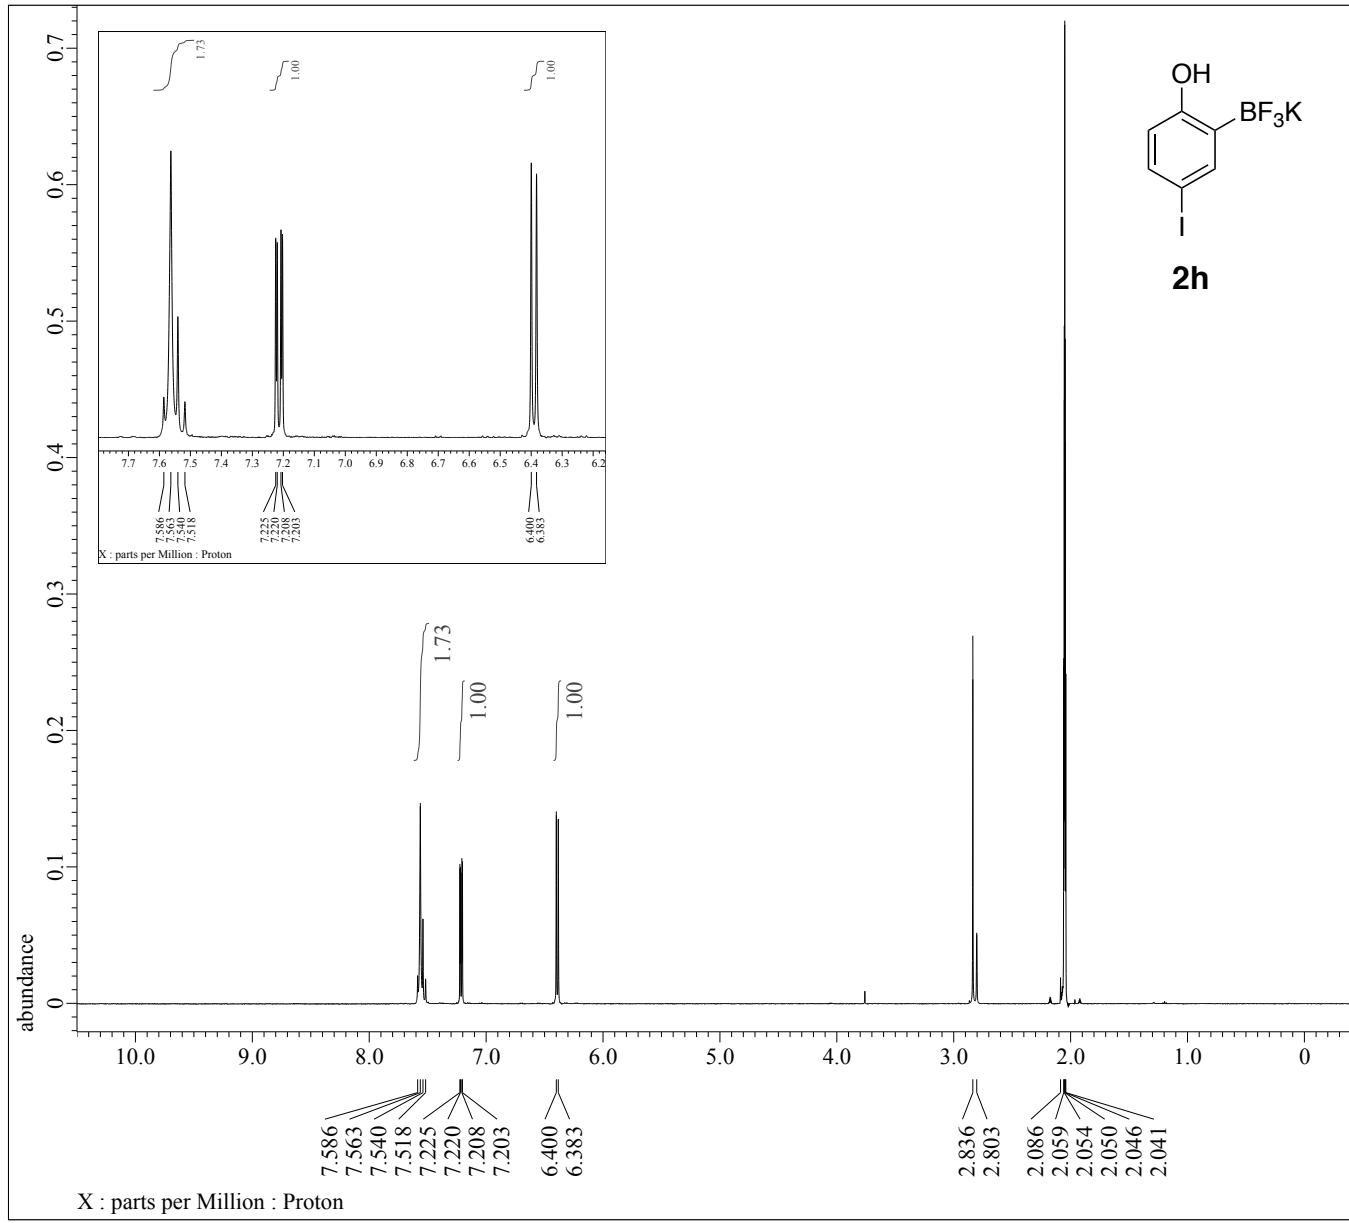

```

---- PROCESSING PARAMETERS ----
sexp( 0.2[Hz], 0.0[s] )
trapezoid( 0[%], 0[%], 80[%], 100[%] )
zerofill( 1 )
fft( 1, TRUE, TRUE )
machinephase
ppm
phase( 3, -20, 69.89901[%] )
以下に由来 : YH-14 (p-I)_Proton-1-1.jdf

```

```

Filename      = YH-14 (p-I)_Proton-1-6
Author        = delta
Experiment    = proton.jxp
Sample_Id     = YH-14 (p-I)
Solvent       = ACETONE-D6
Creation_Time = 22-FEB-2020 13:47:18
Revision_Time = 7-MAR-2020 14:57:00
Current_Time  = 7-MAR-2020 14:58:06

```

```

Comment       = single pulse
Data Format    = 1D COMPLEX
Dim Size      = 104858
Dim Title     = Proton
Dim Units     = [ppm]
Dimensions    = X
Spectrometer  = JNM-ECZ500R/s1

```

```

Field Strength = 11.62926421[T] (500[M]
X_Acq_Duration = 14.11383296[s]
X_Domain       = 1H
X_Freq         = 495.13191398[MHz]
X_Offset       = 5[ppm]
X_Points       = 131072
X_Prescans     = 1
X_Resolution   = 70.85247522[mHz]
X_Sweep        = 9.28677563[kHz]
X_Sweep_Clippped = 7.42942051[kHz]
Irr_Domain     = Proton
Irr_Freq       = 495.13191398[MHz]
Irr_Offset     = 5[ppm]
Tri_Domain     = Proton
Tri_Freq       = 495.13191398[MHz]
Tri_Offset     = 5[ppm]
Clipped        = FALSE
Decimation_Reg = r : 1346 ( 1345 ), g : 52
Scans          = 8
Total_Scans    = 8

```

```

Relaxation_Delay = 3[s]
Recvr Gain       = 66
Temp_Get         = 22[dC]
X_90_Width       = 7.12[us]
X_Acq_Time       = 14.11383296[s]
X_Angle          = 45[deg]
X_Atn            = 3.3[dB]
X_Pulse          = 3.56[us]
Irr_Mode         = Off
Tri_Mode         = Off
Comment_1        = *** Pulse ***
Comment_111      = *** presat time ***
Comment_201      = *** obs_dante presatu
Comment_202      = *** irr_ preaturation
Comment_203      = *** tri_ preaturation

```

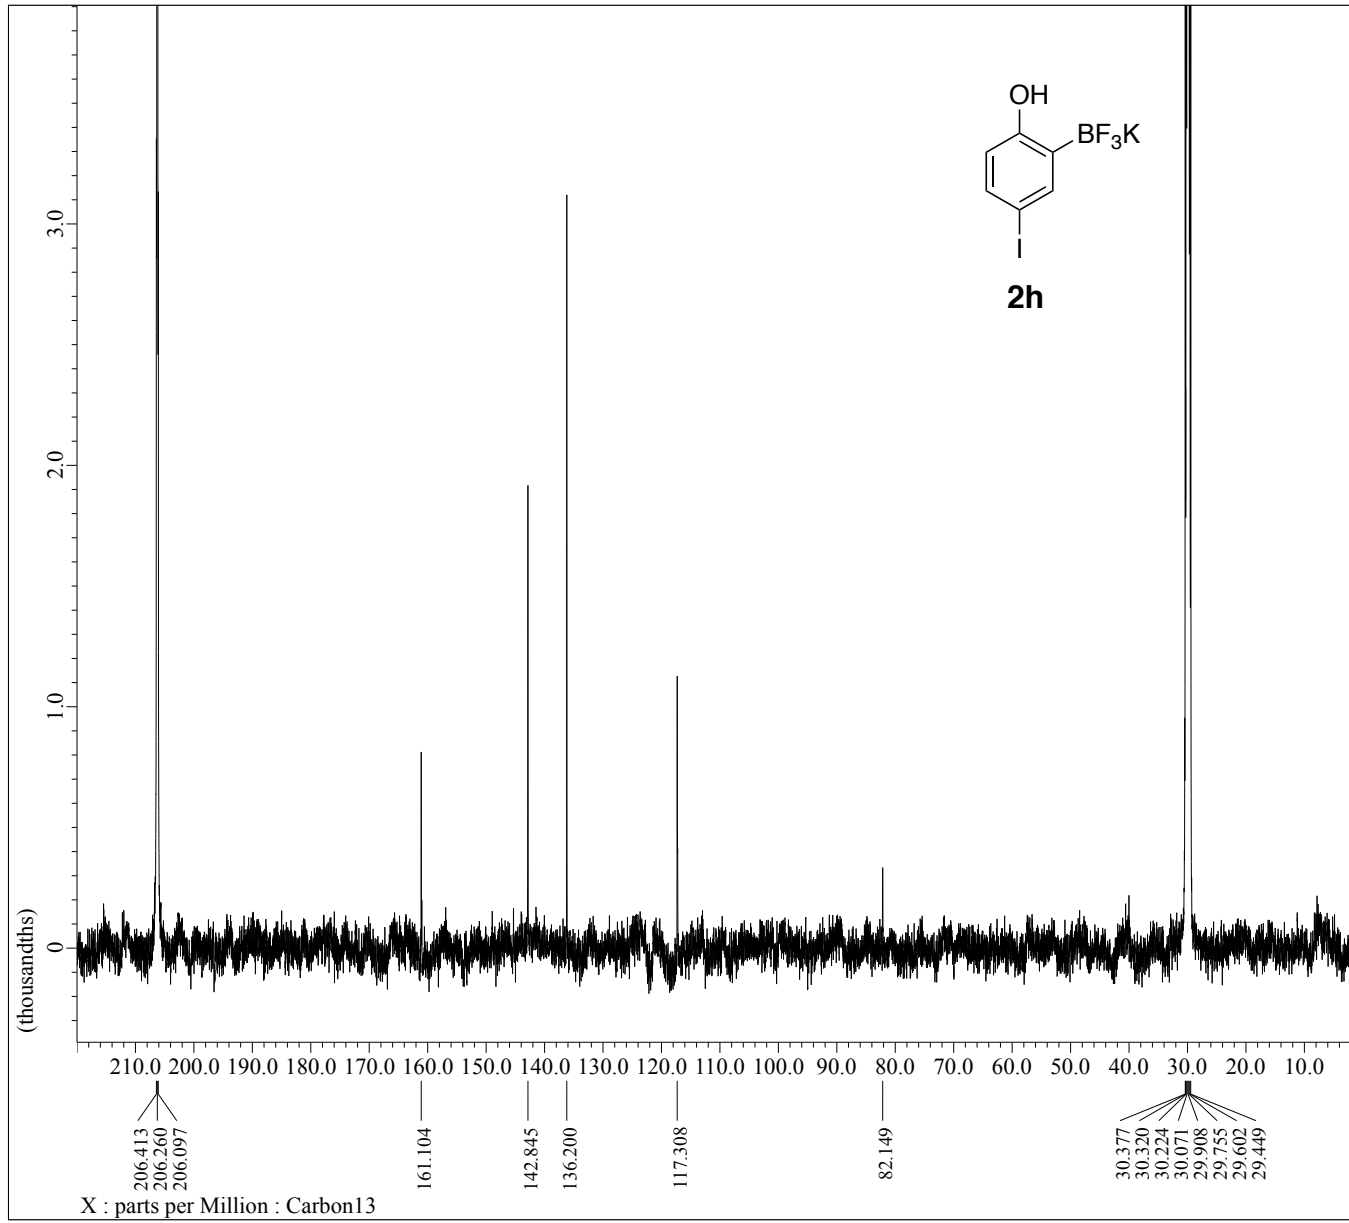

---- PROCESSING PARAMETERS ----  
 sexp( 2.0[Hz], 0.0[s] )  
 trapezoid( 0[%], 0[%], 80[%], 100[%] )  
 zerofill( 1, TRUE )  
 fft( 1, TRUE, TRUE )  
 machinephase  
 ppm  
 phase( 4, 7, 7.81673[%] )  
 base\_correct( Akima, 5, 0, FALSE, 3, None, FA )  
 Derived from: YH-14(p-I)\_Carbon-1-1.jdf

|                          |                      |
|--------------------------|----------------------|
| Filename                 | = YH-14(p-I)_Carbon- |
| Author                   | = delta              |
| Experiment               | = carbon.jxp         |
| Sample Id                | = YH-14(p-I)         |
| Solvent                  | = ACETONE-D6         |
| Actual_Start_Time        | = 24-FEB-2020 21:57: |
| Revision_Time            | = 9-APR-2020 14:19:  |
| Comment                  | = single pulse decou |
| Data Format              | = 1D REAL            |
| Dim Size                 | = 26214              |
| X Domain                 | = Carbon13           |
| Dim Title                | = Carbon13           |
| Dim Units                | = [ppm]              |
| Dimensions               | = X                  |
| Spectrometer             | = JNM-ECZ500R/S1     |
| Field Strength           | = 11.62926421[T] (50 |
| X Acq Duration           | = 0.8388608[s]       |
| X Domain                 | = 13C                |
| X Freq                   | = 124.5010059[MHz]   |
| X Offset                 | = 100[ppm]           |
| X Points                 | = 32768              |
| X Prescans               | = 4                  |
| X Resolution             | = 1.1920929[Hz]      |
| X Sweep                  | = 39.0625[kHz]       |
| X Sweep Clipped          | = 31.25[kHz]         |
| Irr Domain               | = Proton             |
| Irr Freq                 | = 495.13191398[MHz]  |
| Irr Offset               | = 5[ppm]             |
| Clipped                  | = FALSE              |
| Scans                    | = 5000               |
| Total_Scans              | = 5000               |
| Relaxation_Delay         | = 2[s]               |
| Recvr Gain               | = 56                 |
| Temp_Get                 | = 22[dC]             |
| X 90_Width               | = 13.48[us]          |
| X Acq Time               | = 0.8388608[s]       |
| X Angle                  | = 30[deg]            |
| X Atn                    | = 11[dB]             |
| X Pulse                  | = 4.49333333[us]     |
| Irr Atn Dec              | = 26.4[dB]           |
| Irr Atn Dec Calc         | = 26.4[dB]           |
| Irr Atn Dec Default_Calc | = 26.4[dB]           |
| Irr Atn Noe              | = 26.4[dB]           |
| Irr Dec Bandwidth Hz     | = 5.97826087[kHz]    |
| Irr Dec Bandwidth_Ppm    | = 12.07407703[ppm]   |
| Irr Dec Freq             | = 495.13191398[MHz]  |
| Irr Dec Merit Factor     | = 2.2                |
| Irr Decoupling           | = TRUE               |
| Irr Noe                  | = TRUE               |
| Irr Noise                | = WALTZ              |

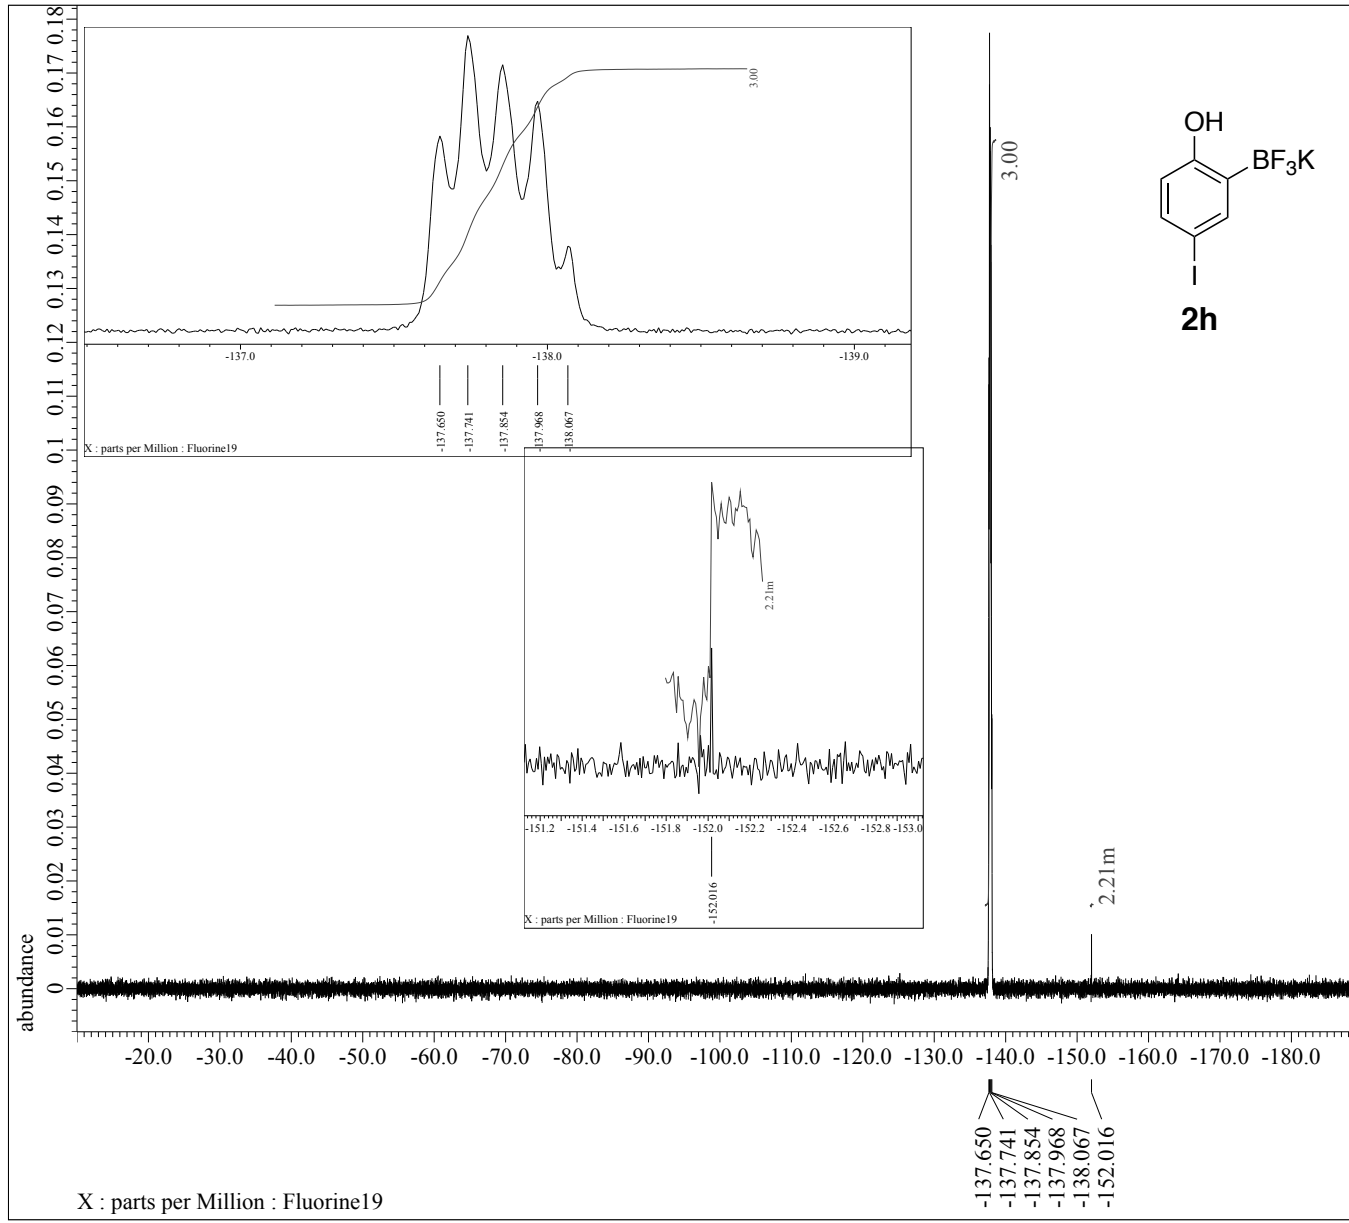

---- PROCESSING PARAMETERS ----  
 sexp( 0.2[Hz], 0.0[s] )  
 trapezoid( 0[%], 0[%], 80[%], 100[%] )  
 zerofill( 1 )  
 fft( 1, TRUE, TRUE )  
 machinephase  
 ppm  
 phase( -0.73926, 0, 50[%] )  
 base\_correct( None, 0, Smooth )  
 以下に由来 : YH-14 (p-I)\_19F-1-1.jdf

|                  |                          |
|------------------|--------------------------|
| Filename         | = YH-14 (p-I)_19F-1-6.jd |
| Author           | = delta                  |
| Experiment       | = single pulse.jxp       |
| Sample Id        | = YH-14 (p-I)            |
| Solvent          | = ACETONE-D6             |
| Creation Time    | = 22-FEB-2020 13:51:46   |
| Revision Time    | = 22-FEB-2020 19:23:29   |
| Current Time     | = 22-FEB-2020 19:23:43   |
| Comment          | = single pulse           |
| Data Format      | = 1D REAL                |
| Dim Size         | = 26214                  |
| Dim Title        | = Fluorine19             |
| Dim Units        | = [ppm]                  |
| Dimensions       | = X                      |
| Spectrometer     | = JNM-ECZ500R/s1         |
| Field Strength   | = 11.62926421[T] (500[M  |
| X Acq Duration   | = 0.28311552[s]          |
| X Domain         | = 19F                    |
| X Freq           | = 465.88941346[MHz]      |
| X Offset         | = -100 [ppm]             |
| X Points         | = 32768                  |
| X Prescans       | = 1                      |
| X Resolution     | = 3.5321271 [Hz]         |
| X Sweep          | = 115.74074074 [kHz]     |
| X Sweep Clipped  | = 92.59259259 [kHz]      |
| Irr Domain       | = Fluorine19             |
| Irr Freq         | = 465.88941346[MHz]      |
| Irr Offset       | = 5 [ppm]                |
| Tri Domain       | = Fluorine19             |
| Tri Freq         | = 465.88941346[MHz]      |
| Tri Offset       | = 5 [ppm]                |
| Clipped          | = FALSE                  |
| Decimation_Reg   | = r : 54 ( 53 ), g : 29  |
| Scans            | = 8                      |
| Total_Scans      | = 8                      |
| Relaxation Delay | = 5 [s]                  |
| Recvr Gain       | = 56                     |
| Temp Get         | = 21.9 [dC]              |
| X 90_Width       | = 7.81 [us]              |
| X Acq Time       | = 0.28311552 [s]         |
| X Angle          | = 45 [deg]               |
| X Atn            | = 3.7 [dB]               |
| X Pulse          | = 3.905 [us]             |
| Irr Mode         | = Off                    |
| Tri Mode         | = Off                    |
| Comment_1        | = *** Pulse ***          |
| Comment_111      | = *** presat time ***    |
| Comment_201      | = *** obs_dante presatu  |
| Comment_202      | = *** irr_preaturation   |
| Comment_203      | = *** tri_preaturation   |

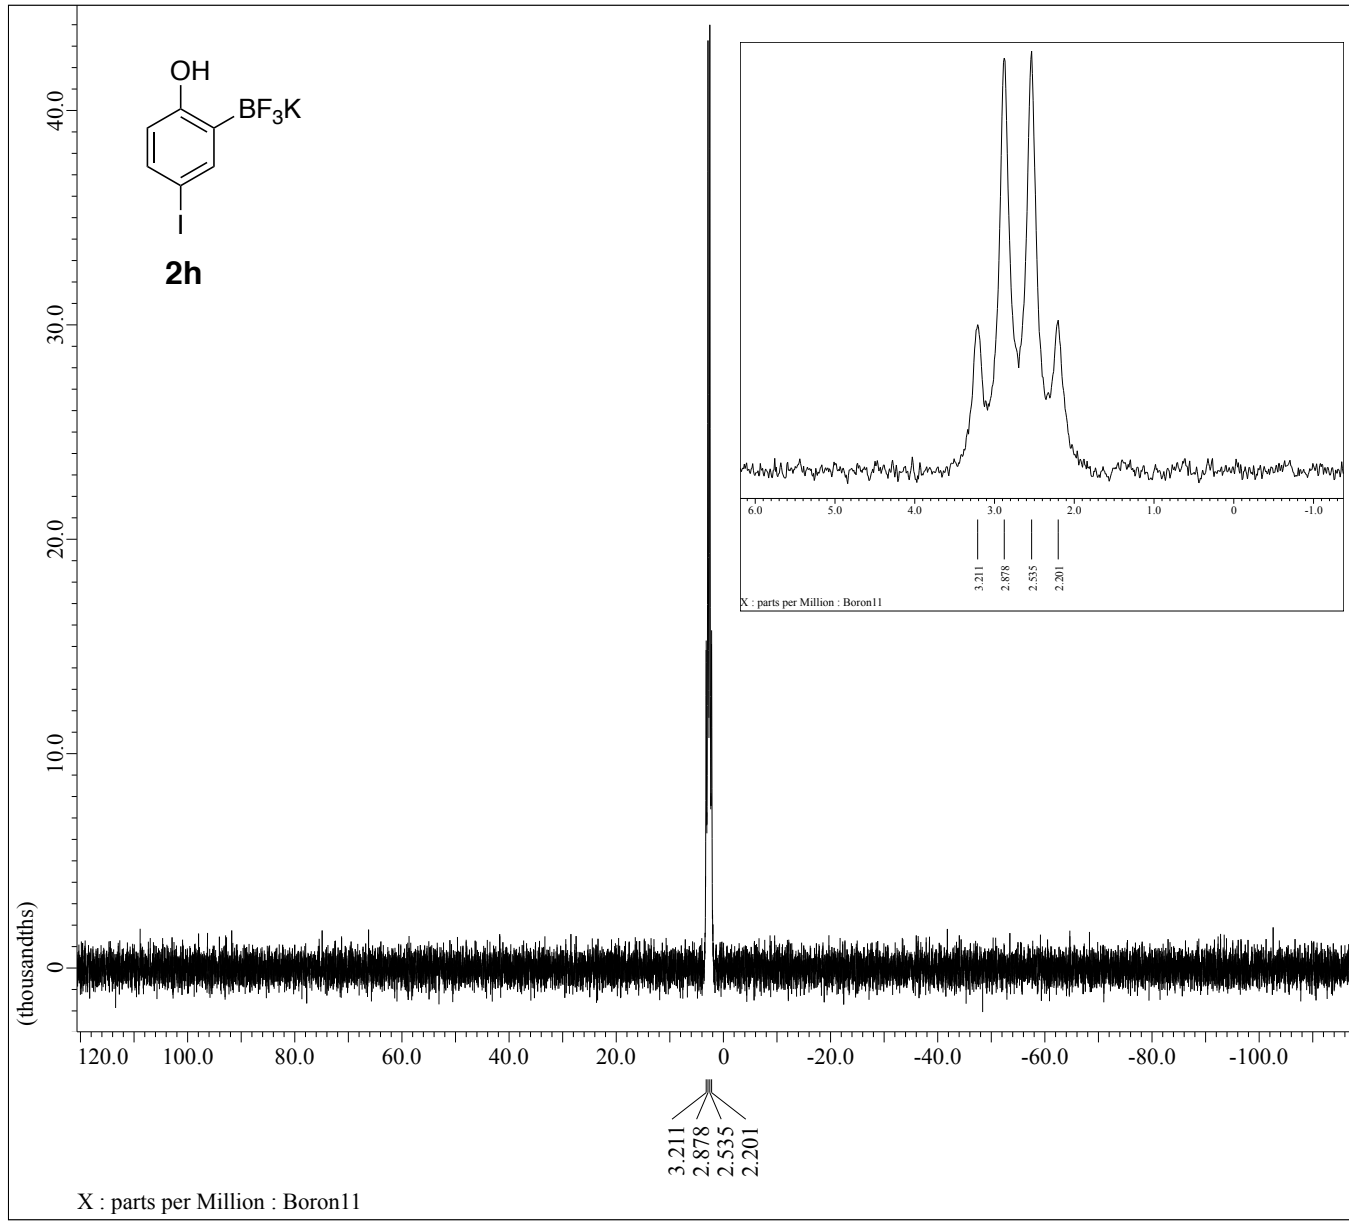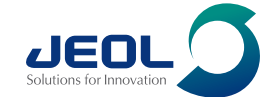

---- PROCESSING PARAMETERS ----  
 sexp( 2.0[Hz], 0.0[s] )  
 trapezoid( 0[%], 0[%], 80[%], 100[%] )  
 zerofill( 1 )  
 fft( 1, TRUE, TRUE )  
 machinephase  
 ppm  
 phase( 14.75953, 0, 50[%] )  
 base\_correct( None, 0, Smooth )  
 以下に由来 : YH-14 (p-I)\_11B\_1Hdec-1-1. jdf

|                          |                       |
|--------------------------|-----------------------|
| Filename                 | = YH-14 (p-I)_11B_1Hd |
| Author                   | = delta               |
| Experiment               | = single_pulse_dec.j  |
| Sample Id                | = YH-14 (p-I)         |
| Solvent                  | = ACETONE-D6          |
| Creation Time            | = 22-FEB-2020 13:55:  |
| Revision Time            | = 22-FEB-2020 18:57:  |
| Current Time             | = 22-FEB-2020 18:59:  |
| Comment                  | = single pulse decou  |
| Data Format              | = 1D REAL             |
| Dim Size                 | = 26214               |
| Dim Title                | = Boron11             |
| Dim Units                | = [ppm]               |
| Dimensions               | = X                   |
| Spectrometer             | = JNM-ECZ500R/S1      |
| Field Strength           | = 11.62926421[T] (50  |
| X Acq Duration           | = 0.66060288[s]       |
| X Domain                 | = 11B                 |
| X Freq                   | = 158.85814241[MHz]   |
| X Offset                 | = 0[ppm]              |
| X Points                 | = 32768               |
| X Prescans               | = 4                   |
| X Resolution             | = 1.51376876[Hz]      |
| X Sweep                  | = 49.6031746[kHz]     |
| X Sweep Clipped          | = 39.68253968[kHz]    |
| Irr Domain               | = Proton              |
| Irr Freq                 | = 495.13191398[MHz]   |
| Irr Offset               | = 5[ppm]              |
| Clipped                  | = TRUE                |
| Decimation_Reg           | = r: 252( 251),g: 40  |
| Scans                    | = 100                 |
| Total_Scans              | = 100                 |
| Relaxation_Delay         | = 2[s]                |
| Recvr Gain               | = 56                  |
| Temp_Get                 | = 22.2[dC]            |
| X 90 Width               | = 15.74[us]           |
| X Acq Time               | = 0.66060288[s]       |
| X Angle                  | = 30[deg]             |
| X Atn                    | = 10.4[dB]            |
| X Pulse                  | = 5.24666667[us]      |
| Irr Atn Dec              | = 26.4[dB]            |
| Irr Atn Dec Calc         | = 26.4[dB]            |
| Irr Atn Dec_Default_Calc | = 26.4[dB]            |
| Irr Atn Noe              | = 26.4[dB]            |
| Irr Dec Bandwidth_Hz     | = 5.97826087[kHz]     |
| Irr Dec Bandwidth_Ppm    | = 12.07407703[ppm]    |
| Irr Dec Freq             | = 495.13191398[MHz]   |
| Irr Dec Merit Factor     | = 2.2                 |
| Irr Decoupling           | = TRUE                |
| Irr Noe                  | = TRUE                |

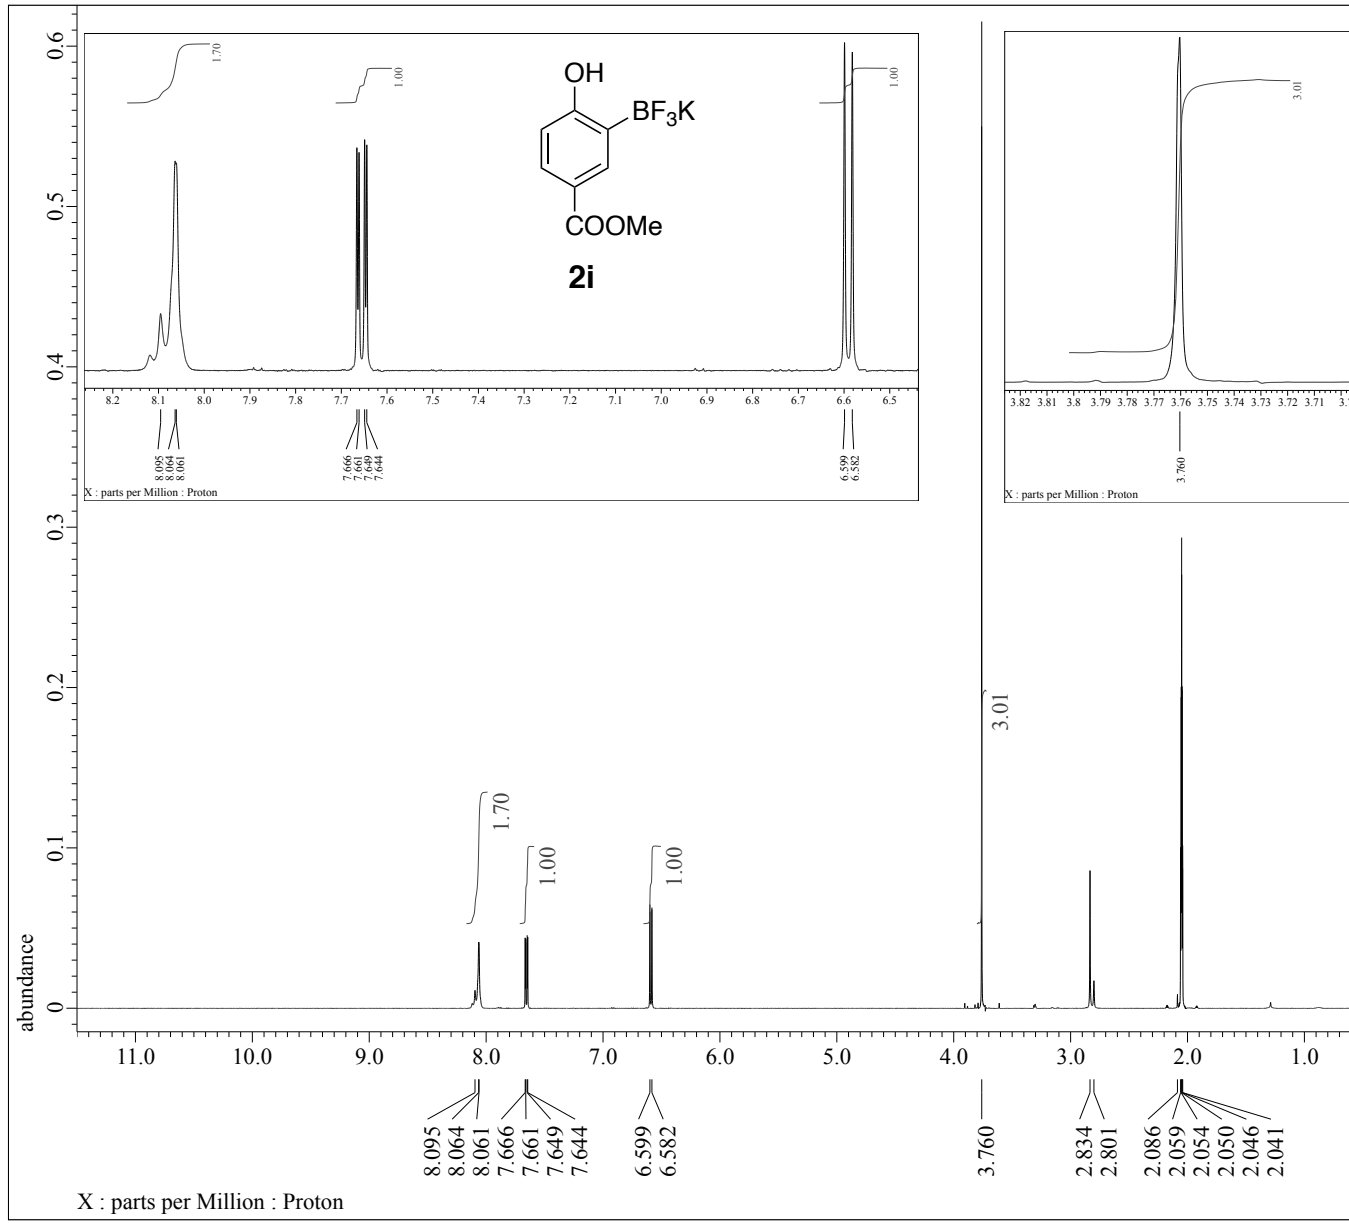

---- PROCESSING PARAMETERS ----  
 sexp( 0.2[Hz], 0.0[s] )  
 trapezoid( 0[%], 0[%], 80[%], 100[%] )  
 zerofill( 1 )  
 fft( 1, TRUE, TRUE )  
 machinephase  
 ppm  
 phase( 3.5, -24, 69.66154[%] )  
 base\_correct( None, 0, Smooth )  
 以下に由来 : YH-78 (CO2Me)\_Proton-1-1.jdf

Filename = YH-78 (CO2Me)\_Proton-1  
 Author = delta  
 Experiment = proton.jxp  
 Sample\_Id = YH-78 (CO2Me)  
 Solvent = ACETONE-D6  
 Creation\_Time = 22-FEB-2020 14:03:56  
 Revision\_Time = 9-MAR-2020 21:00:38  
 Current\_Time = 9-MAR-2020 21:00:59

Comment = single pulse  
 Data\_Format = 1D REAL  
 Dim\_Size = 104858  
 Dim\_Title = Proton  
 Dim\_Units = [ppm]  
 Dimensions = X  
 Spectrometer = JNM-ECZ500R/s1

Field\_Strength = 11.62926421[T] (500[M]  
 X\_Acq\_Duration = 14.11383296[s]  
 X\_Domain = 1H  
 X\_Freq = 495.13191398[MHz]  
 X\_Offset = 5[ppm]  
 X\_Points = 131072  
 X\_Prescans = 1  
 X\_Resolution = 70.85247522[mHz]  
 X\_Sweep = 9.28677563[kHz]  
 X\_Sweep\_Clippped = 7.42942051[kHz]  
 Irr\_Domain = Proton  
 Irr\_Freq = 495.13191398[MHz]  
 Irr\_Offset = 5[ppm]  
 Tri\_Domain = Proton  
 Tri\_Freq = 495.13191398[MHz]  
 Tri\_Offset = 5[ppm]  
 Clipped = FALSE  
 Decimation\_Reg = r : 1346 ( 1345 ), g : 52  
 Scans = 8  
 Total\_Scans = 8

Relaxation\_Delay = 3[s]  
 Recvr\_Gain = 56  
 Temp\_Get = 22.4[dC]  
 X\_90\_Width = 7.12[us]  
 X\_Acq\_Time = 14.11383296[s]  
 X\_Angle = 45[deg]  
 X\_Atn = 3.3[dB]  
 X\_Pulse = 3.56[us]  
 Irr\_Mode = Off  
 Tri\_Mode = Off  
 Comment\_1 = \*\*\* Pulse \*\*\*  
 Comment\_111 = \*\*\* presat time \*\*\*  
 Comment\_201 = \*\*\* obs\_dante presatu  
 Comment\_202 = \*\*\* irr\_preaturation  
 Comment\_203 = \*\*\* tri\_preaturation



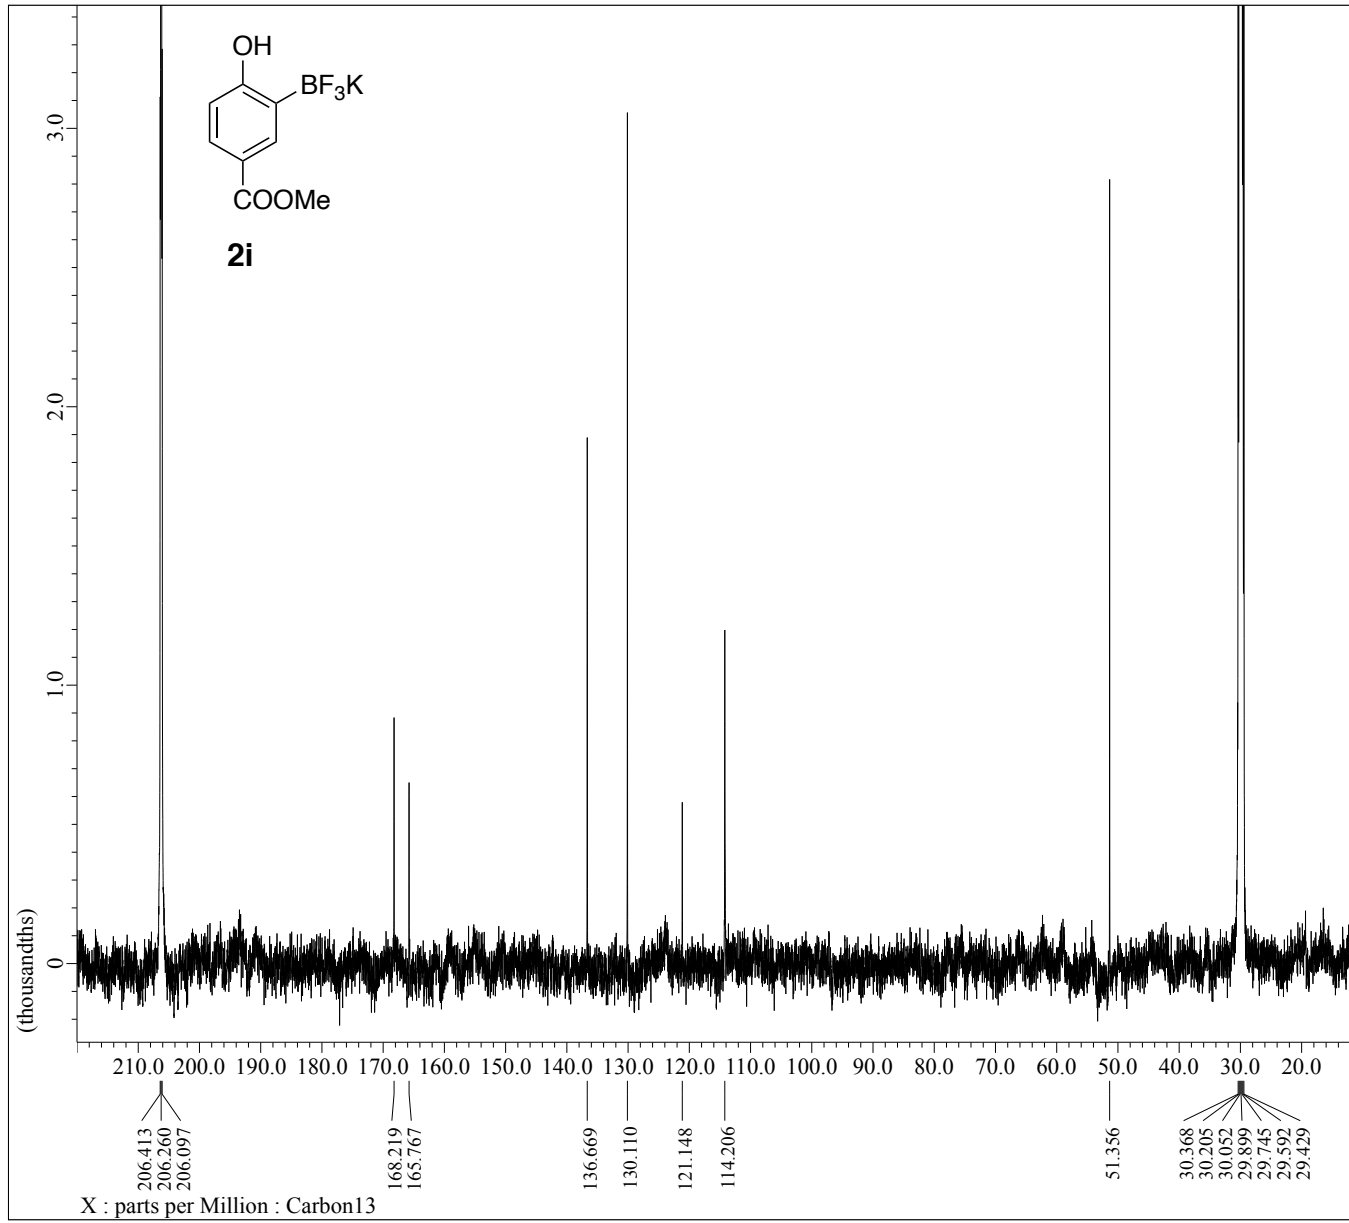

```

---- PROCESSING PARAMETERS ----
sexp( 2.0[Hz], 0.0[s] )
trapezoid( 0[%], 0[%], 80[%], 100[%] )
zerofill( 1, TRUE )
fft( 1, TRUE, TRUE )
machinephase
ppm
phase( 3.25, 8, 7.98077[%] )
base_correct( Akima, 5, 0, FALSE, 3, None, FA
phase( 0, 0, 8.20204[%] )
reference( 205.3725[ppm], 206.26[ppm] )

Derived from: YH-78(CO2Me)_Carbon-1-1.jdf

```

```

Filename           = YH-78(CO2Me)_Carbo
Author             = delta
Experiment         = carbon.jxp
Sample_Id          = YH-78(CO2Me)
Solvent            = ACETONE-D6
Actual_Start_Time  = 25-FEB-2020 02:00:
Revision_Time      = 13-APR-2020 17:49:

Comment           = single pulse decou
Data_Format       = 1D REAL
Dim_Size          = 26214
X_Domain          = Carbon13
Dim_Title         = Carbon13
Dim_Units         = [ppm]
Dimensions        = X
Spectrometer      = JNM-ECZ500R/S1

Field Strength    = 11.62926421[T] (50
X_Acq_Duration    = 0.8388608[s]
X_Domain          = 13C
X_Freq            = 124.5010059[MHz]
X_Offset          = 100[ppm]
X_Points          = 32768
X_Prescans        = 4
X_Resolution      = 1.1920929[Hz]
X_Sweep           = 39.0625[kHz]
X_Sweep_Clipped   = 31.25[kHz]
Irr_Domain        = Proton
Irr_Freq          = 495.13191398[MHz]
Irr_Offset        = 5[ppm]
Clipped           = FALSE
Scans             = 5000
Total_Scans       = 5000

Relaxation_Delay  = 2[s]
Recvr_Gain        = 56
Temp_Get          = 20.7[dC]
X_90_Width        = 13.48[us]
X_Acq_Time        = 0.8388608[s]
X_Angle           = 30[deg]
X_Atn             = 11[dB]
X_Pulse           = 4.49333333[us]
Irr_Atn_Dec       = 26.4[dB]
Irr_Atn_Dec_Calc = 26.4[dB]
Irr_Atn_Dec_Default_Calc = 26.4[dB]
Irr_Atn_Noise    = 26.4[dB]
Irr_Dec_Bandwidth_Hz = 5.97826087[kHz]
Irr_Dec_Bandwidth_Ppm = 12.07407703[ppm]
Irr_Dec_Freq     = 495.13191398[MHz]
Irr_Dec_Merit_Factor = 2.2
Irr_Decoupling   = TRUE
Irr_Noise        = TRUE
Irr_Noise        = WALTZ

```

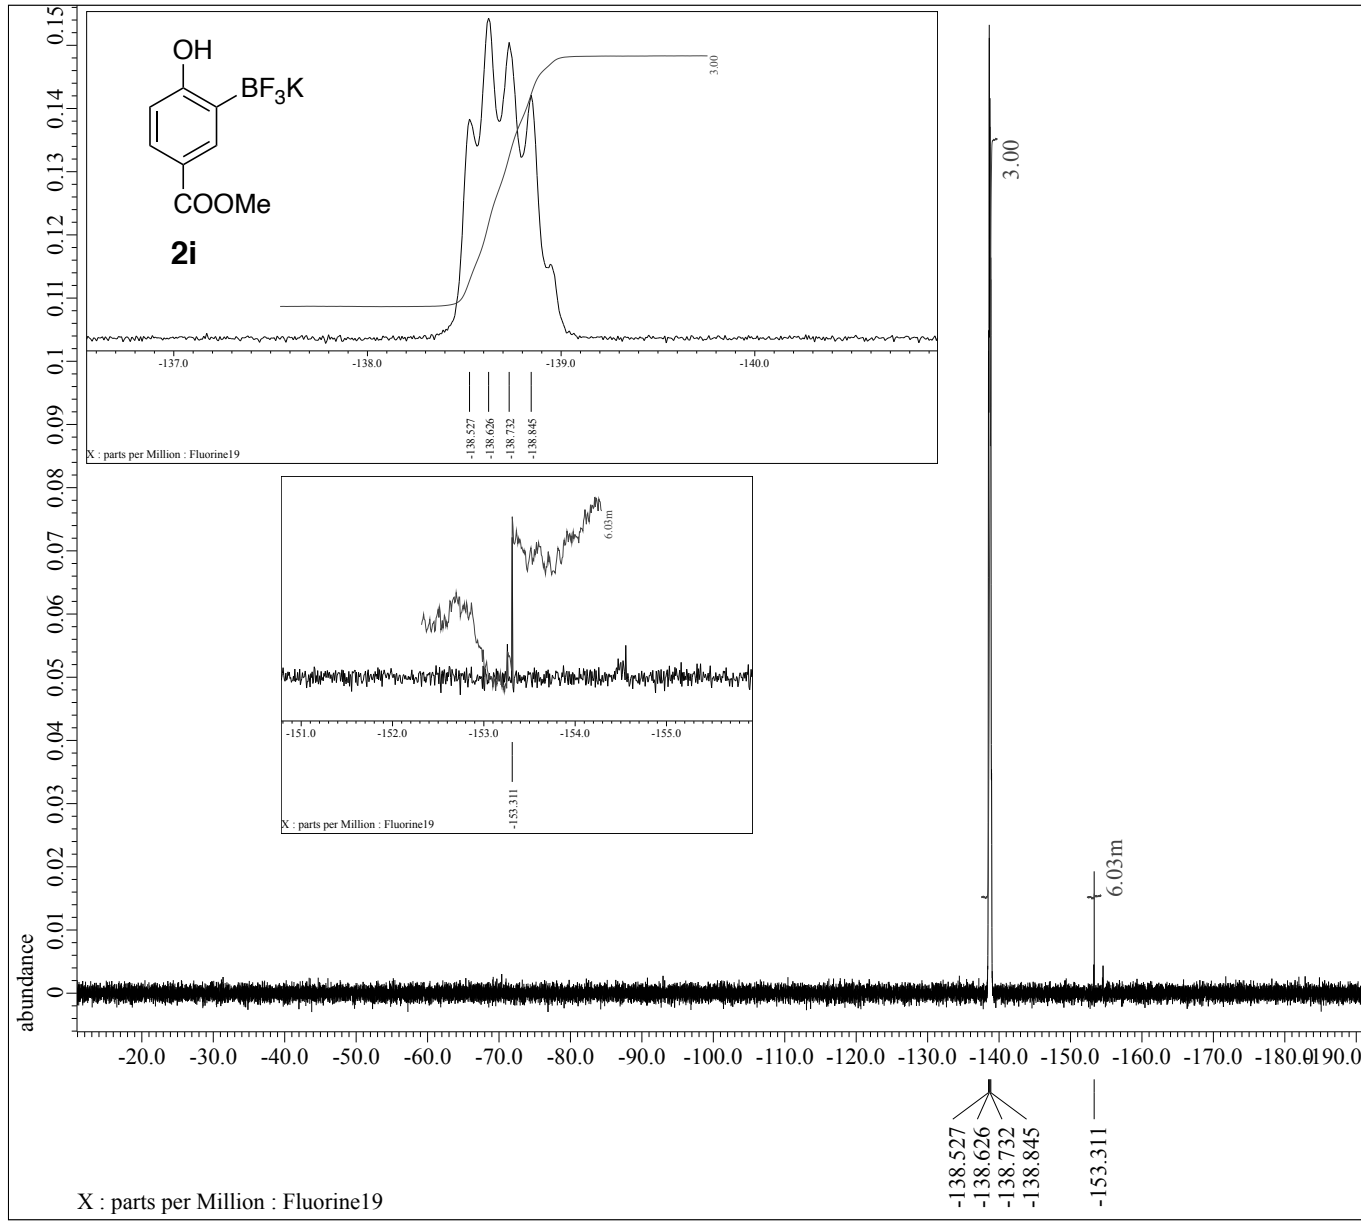

---- PROCESSING PARAMETERS ----  
 sexp( 0.2[Hz], 0.0[s] )  
 trapezoid( 0[%], 0[%], 80[%], 100[%] )  
 zerofill( 1 )  
 fft( 1, TRUE, TRUE )  
 machinephase  
 ppm  
 phase( -4.689, 0, 50[%] )  
 base\_correct( None, 0, Smooth )  
 以下に由来 : YH-78 (CO2Me)\_19F-1-1.jdf

Filename = YH-78 (CO2Me)\_19F-1-5.  
 Author = delta  
 Experiment = single pulse.jxp  
 Sample Id = YH-78 (CO2Me)  
 Solvent = ACETONE-D6  
 Creation Time = 22-FEB-2020 14:08:23  
 Revision Time = 22-FEB-2020 19:09:35  
 Current Time = 22-FEB-2020 19:11:11

Comment = single pulse  
 Data Format = 1D REAL  
 Dim Size = 26214  
 Dim Title = Fluorine19  
 Dim Units = [ppm]  
 Dimensions = X  
 Spectrometer = JNM-ECZ500R/s1

Field Strength = 11.62926421[T] (500[M]  
 X Acq Duration = 0.28311552[s]  
 X Domain = 19F  
 X Freq = 465.88941346[MHz]  
 X Offset = -100[ppm]  
 X Points = 32768  
 X Prescans = 1  
 X Resolution = 3.5321271[Hz]  
 X Sweep = 115.74074074[kHz]  
 X Sweep Clipped = 92.59259259[kHz]  
 Irr Domain = Fluorine19  
 Irr Freq = 465.88941346[MHz]  
 Irr Offset = 5[ppm]  
 Tri Domain = Fluorine19  
 Tri Freq = 465.88941346[MHz]  
 Tri Offset = 5[ppm]  
 Clipped = FALSE  
 Decimation\_Reg = r: 54 ( 53),g: 29  
 Scans = 8  
 Total\_Scans = 8

Relaxation Delay = 5[s]  
 Recvr Gain = 56  
 Temp Get = 22.1[dC]  
 X 90\_Width = 7.81[us]  
 X Acq Time = 0.28311552[s]  
 X Angle = 45[deg]  
 X Atn = 3.7[dB]  
 X Pulse = 3.905[us]  
 Irr Mode = Off  
 Tri Mode = Off  
 Comment\_1 = \*\*\* Pulse \*\*\*  
 Comment\_111 = \*\*\* presat time \*\*\*  
 Comment\_201 = \*\*\* obs\_dante presatu  
 Comment\_202 = \*\*\* irr\_preaturation  
 Comment\_203 = \*\*\* tri\_preaturation

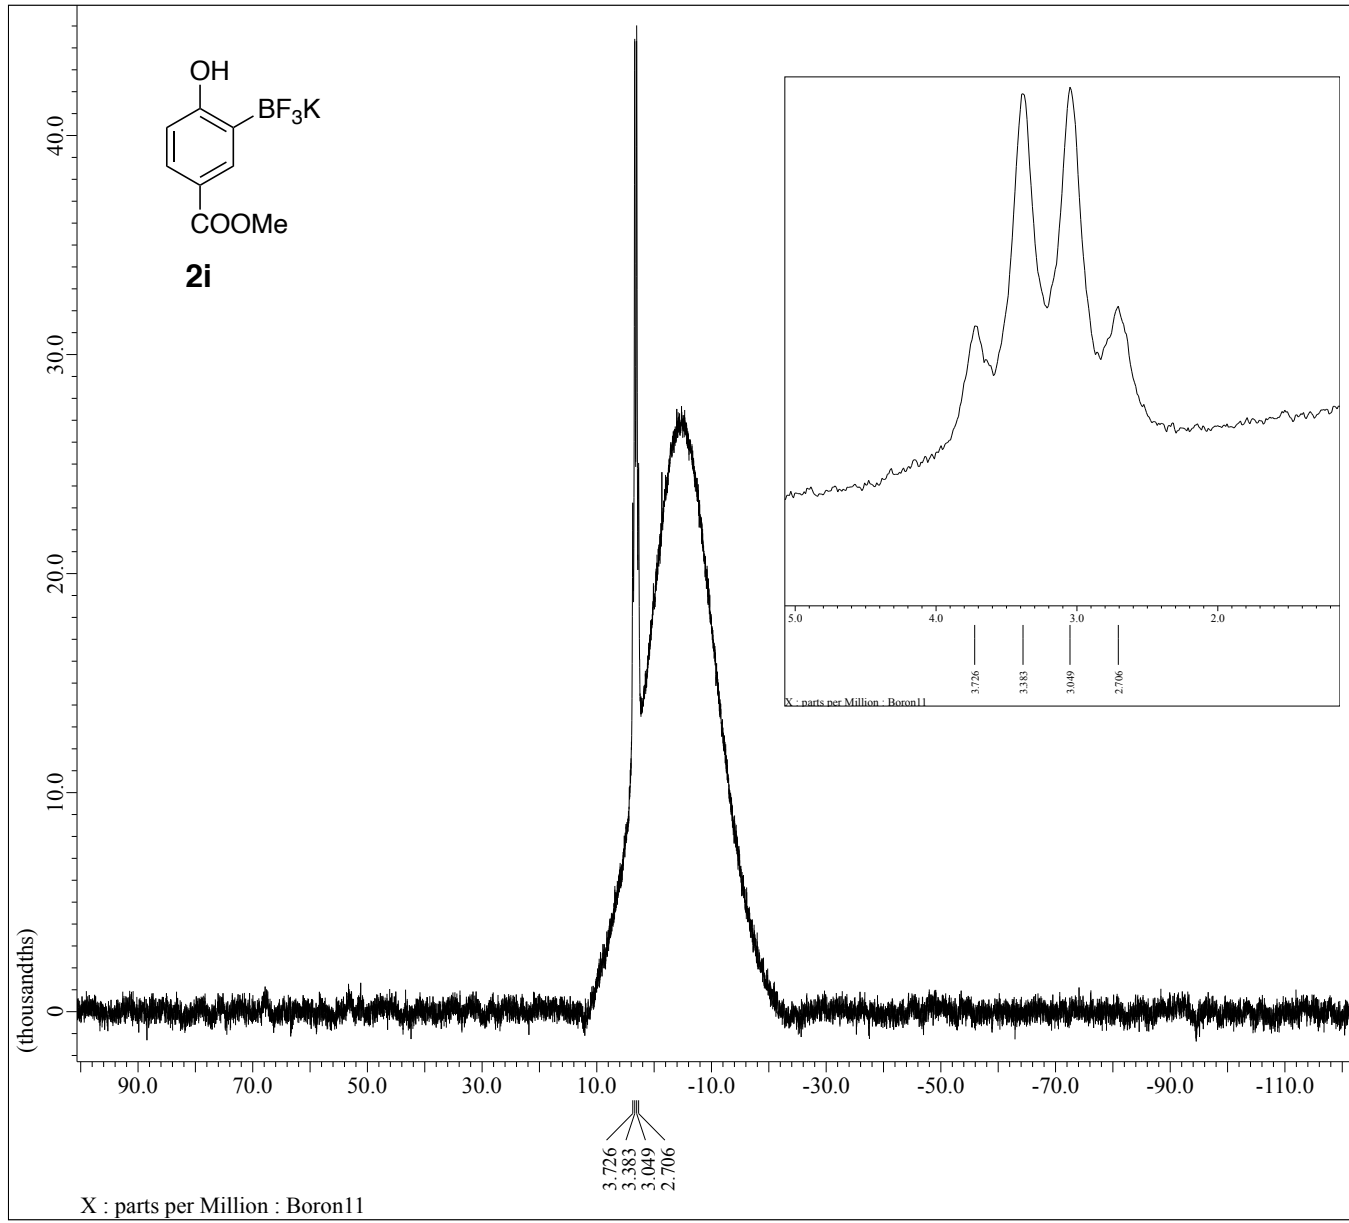

```

---- PROCESSING PARAMETERS ----
sexp( 2.0[Hz], 0.0[s] )
trapezoid( 0[%], 0[%], 80[%], 100[%] )
zerofill( 1, TRUE )
fft( 1, TRUE, TRUE )
machinephase
ppm
phase( 12.08005, 0, 50[%] )
base_correct( Akima, 5, 0, FALSE, 3, None, FA
Derived from: YH-78(CO2Me)_11B_1Hdec-1-1 (2) .

```

```

Filename      = YH-78(CO2Me)_11B_1
Author        = delta
Experiment    = single pulse dec.j
Sample_Id     = YH-78(CO2Me)
Solvent       = ACETONE-D6
Actual_Start_Time = 22-FEB-2020 20:19:
Revision_Time = 7-APR-2020 13:13:

```

```

Comment       = single pulse decou
Data_Format   = 1D REAL
Dim_Size      = 26214
X_Domain      = Boron11
Dim_Title     = Boron11
Dim_Units     = [ppm]
Dimensions    = X
Spectrometer  = JNM-ECZ500R/S1

```

```

Field Strength = 11.62926421[T] (50
X_Acq_Duration = 0.66060288[s]
X_Domain       = 11B
X_Freq         = 158.85814241[MHz]
X_Offset       = 0[ppm]
X_Points       = 32768
X_Prescans     = 4
X_Resolution   = 1.51376876[Hz]
X_Sweep        = 49.6031746[kHz]
X_Sweep_Clippped = 39.68253968[kHz]
Irr_Domain     = Proton
Irr_Freq       = 495.13191398[MHz]
Irr_Offset     = 5[ppm]
Clipped        = TRUE
Scans          = 300
Total_Scans    = 300

```

```

Relaxation_Delay = 2[s]
Recvr_Gain       = 56
Temp_Get         = 21.8[dC]
X_90_Width      = 15.74[us]
X_Acq_Time       = 0.66060288[s]
X_Angle          = 30[deg]
X_Atn            = 10.4[dB]
X_Pulse          = 5.24666667[us]
Irr_Atn_Dec      = 26.4[dB]
Irr_Atn_Dec_Calc = 26.4[dB]
Irr_Atn_Dec_Default_Calc = 26.4[dB]
Irr_Atn_Noise    = 26.4[dB]
Irr_Dec_Bandwidth_Hz = 5.97826087[kHz]
Irr_Dec_Bandwidth_Ppm = 12.07407703[ppm]
Irr_Dec_Freq     = 495.13191398[MHz]
Irr_Dec_Merit_Factor = 2.2
Irr_Decoupling   = TRUE
Irr_Noise        = TRUE
Irr_Noise        = WALTZ

```

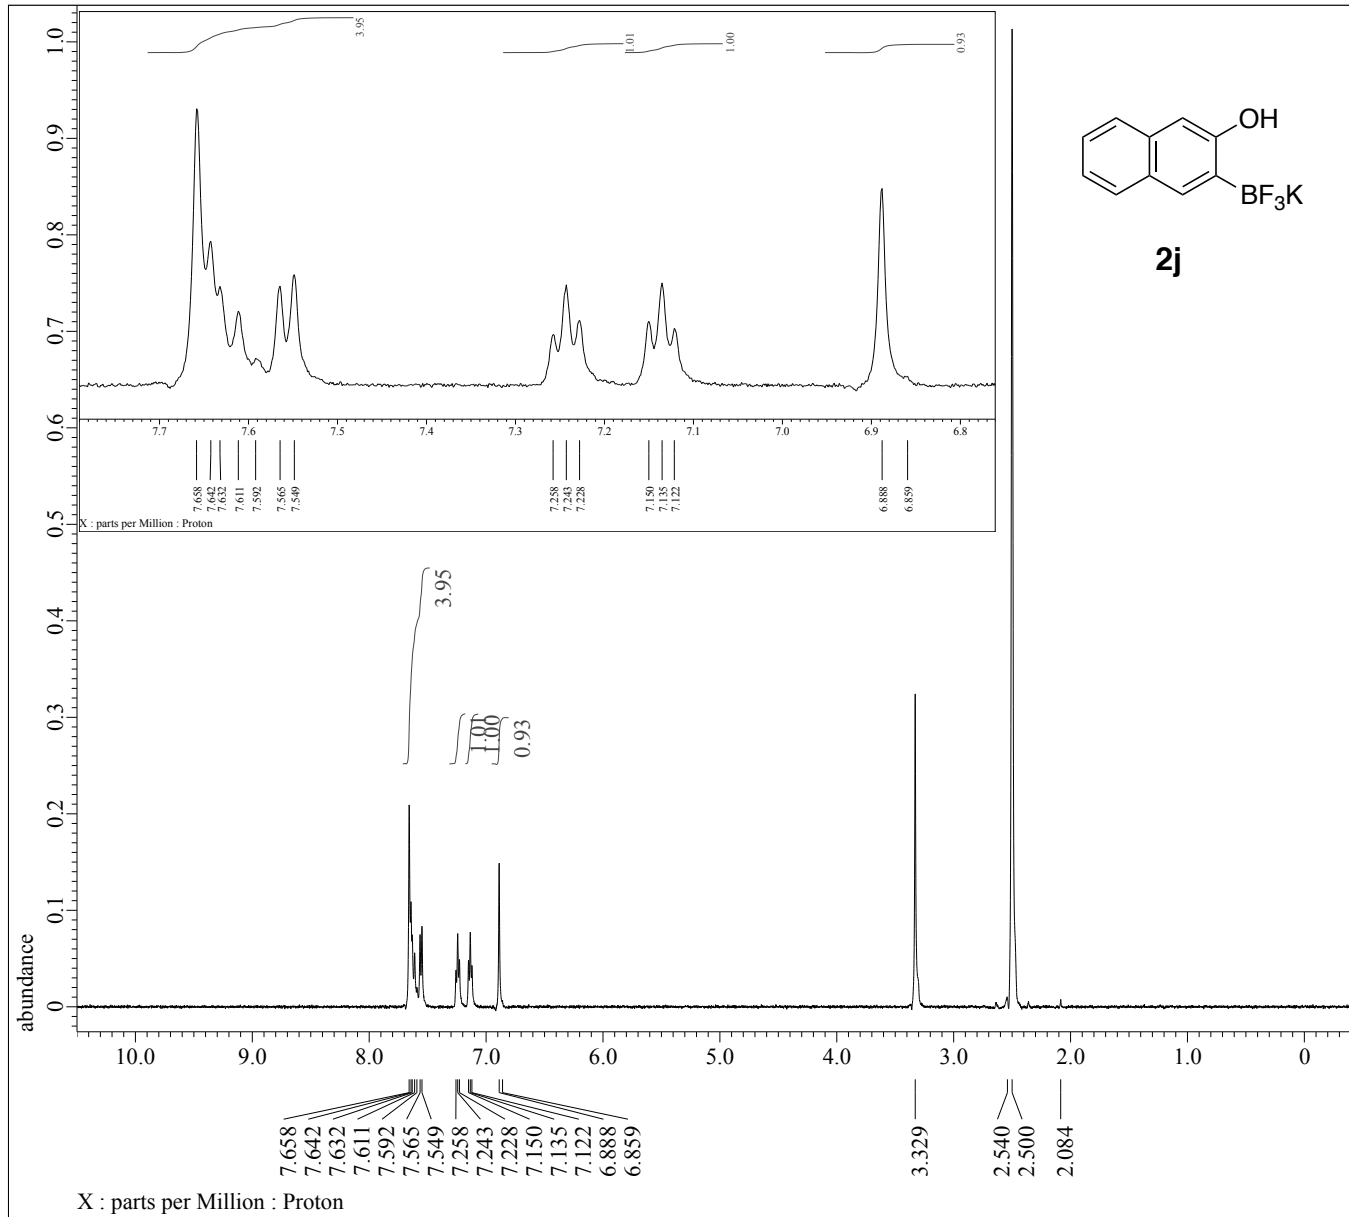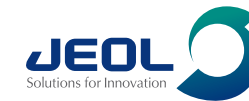

```

---- PROCESSING PARAMETERS ----
sexp( 0.2[Hz], 0.0[s] )
trapezoid( 0[%], 0[%], 80[%], 100[%] )
zerofill( 1 )
fft( 1, TRUE, TRUE )
machinephase
ppm
phase( -3, -17, 40.67603[%] )
base_correct( None, 0, Smooth )

```

以下に由来 : YH-134-(Np)\_Proton-1-1.jdf

```

Filename      = YH-134-(Np)_Proton-1-
Author        = delta
Experiment    = proton.jxp
Sample_Id     = YH-134-(Np)
Solvent       = ACETONE-D6
Creation_Time = 22-FEB-2020 18:03:07
Revision_Time = 9-MAR-2020 19:56:49
Current_Time  = 9-MAR-2020 19:57:32

```

```

Comment       = single pulse
Data Format    = 1D REAL
Dim Size      = 13107
Dim Title     = Proton
Dim Units     = [ppm]
Dimensions    = X
Spectrometer  = JNM-ECZ500R/s1

```

```

Field Strength = 11.62926421[T] (500[M]
X_Acq_Duration = 1.76422912[s]
X_Domain       = 1H
X_Freq         = 495.13191398[MHz]
X_Offset       = 5[ppm]
X_Points       = 16384
X_Prescans     = 1
X_Resolution   = 0.5668198[Hz]
X_Sweep        = 9.28677563[kHz]
X_Sweep_Clippped = 7.42942051[kHz]
Irr_Domain     = Proton
Irr_Freq       = 495.13191398[MHz]
Irr_Offset     = 5[ppm]
Tri_Domain     = Proton
Tri_Freq       = 495.13191398[MHz]
Tri_Offset     = 5[ppm]
Clipped        = FALSE
Decimation_Reg = r : 1346( 1345),g : 52
Scans          = 1
Total_Scans    = 1

```

```

Relaxation_Delay = 5[s]
Recvr Gain       = 56
Temp_Get         = 21.8[dC]
X_90_Width       = 7.12[us]
X_Acq_Time       = 1.76422912[s]
X_Angle          = 45[deg]
X_Atn            = 3.3[dB]
X_Pulse         = 3.56[us]
Irr_Mode         = Off
Tri_Mode         = Off
Comment_1        = *** Pulse ***
Comment_111      = *** presat time ***
Comment_201      = *** obs_dante_presatu
Comment_202      = *** irr_preaturation
Comment_203      = *** tri_preaturation

```

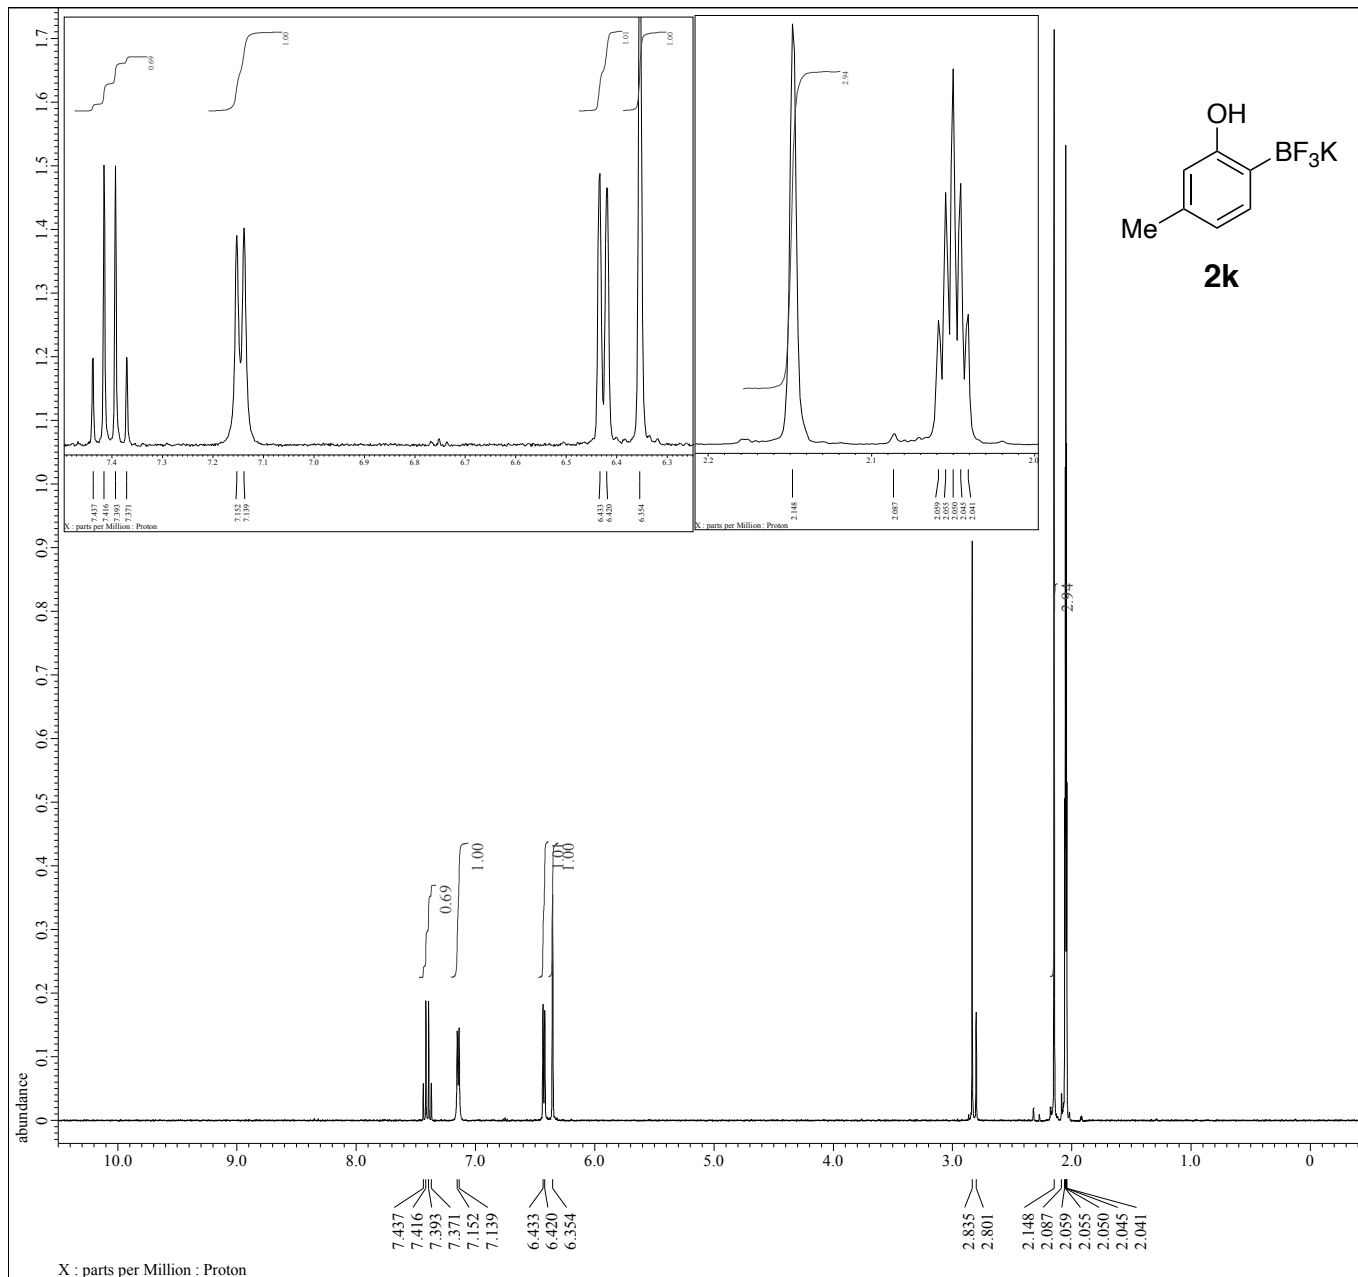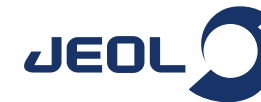

```

---- PROCESSING PARAMETERS ----
sexp( 0.2[Hz], 0.0[s] )
trapezoid( 0[%], 0[%], 80[%], 100[%] )
zeroFill( 1 )
fft( 1, TRUE, TRUE )
machinephase
ppm
base_correct( None, 0, Smooth )

```

以下に由来: YH-110(m-Me)\_Proton-1-1.jdf

```

Filename      = YH-110(m-Me)_Proton-1
Author        = delta
Experiment     = proton.jxp
Sample_Id     = YH-110(m-Me)
Solvent       = ACETONE-D6
Actual_Start_Time = 10-MAR-2020 22:20:20
Revision_Time = 11-MAR-2020 11:31:23

```

```

Comment       = single_pulse
Data_Format   = ID_REAL
Dim_Size      = 13107
Dim_Title     = Proton
Dim_Units     = [ppm]
Dimensions    = X
Spectrometer  = JNM-ECZ500R/S1

```

```

Field_Strength = 11.62926421[T] (500[M]
X_Acq_Duration = 1.76422912[s]
X_Domain       = 1H
X_Freq         = 495.13191398[MHz]
X_Offset       = 5[ppm]
X_Points       = 16384
X_Prescans     = 1
X_Resolution   = 0.5668198[Hz]
X_Sweep        = 9.28677563[kHz]
X_Sweep_Clipped = 7.42942051[kHz]
Irr_Domain     = Proton
Irr_Freq       = 495.13191398[MHz]
Irr_Offset     = 5[ppm]
Tri_Domain     = Proton
Tri_Freq       = 495.13191398[MHz]
Tri_Offset     = 5[ppm]
Clipped        = FALSE
Scans          = 8
Total_Scans    = 8

```

```

Relaxation_Delay = 5[s]
Recvr_Gain       = 66
Temp_Get         = 21.8[dc]
X_90_Width       = 7.12[us]
X_Acq_Time       = 1.76422912[s]
X_Angle          = 45[deg]
X_Attn           = 3.3[dB]
X_Pulse          = 3.56[us]
Irr_Mode         = Off
Tri_Mode         = Off
Dante_Loop       = 500
Dante_Preset    = FALSE
Decimation_Rate = 0
Initial_Wait     = 1[s]
Phase            = (0, 90, 270, 180, 180)
Preset_Time      = 5[s]
Preset_Time_Plug = FALSE
Relaxation_Delay_Calc = 0[s]
Relaxation_Delay_Temp = 5[s]
Repetition_Time  = 6.76422912[s]

```

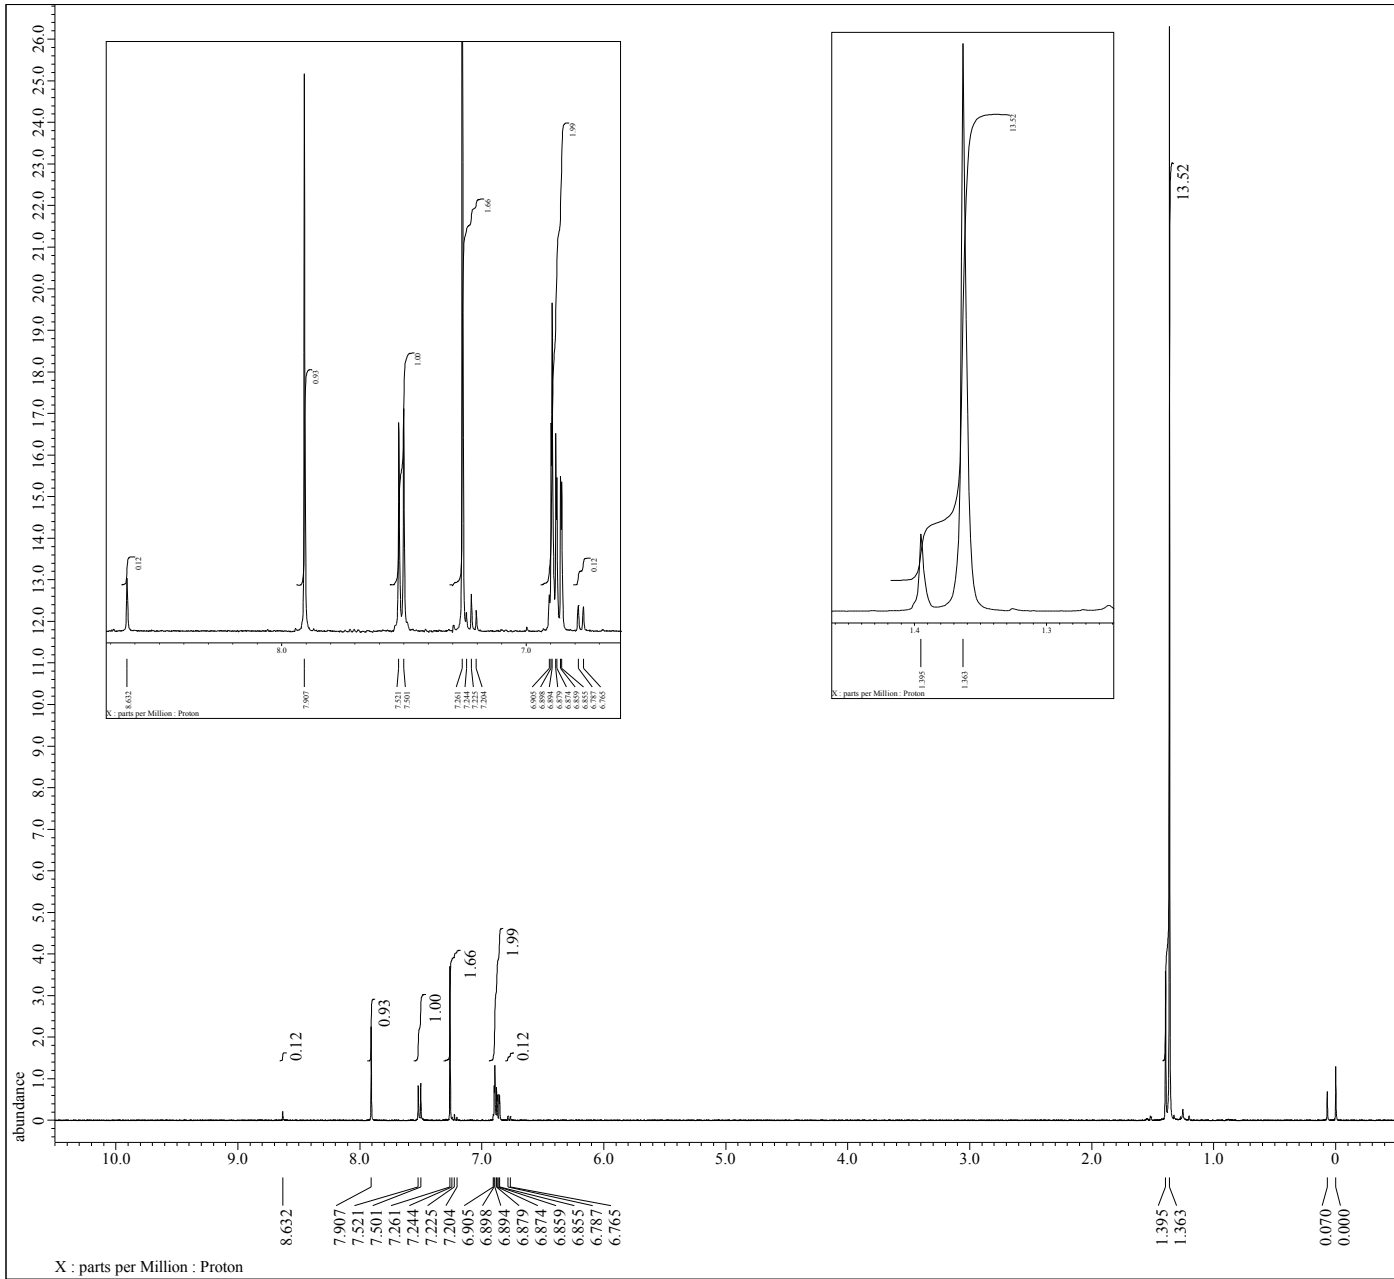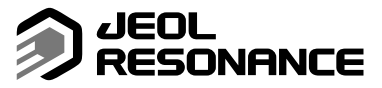

```

Filename = YH-254(m-Cl)_Proton-1-11.j
Author = iwawawa
Experiment = proton.jpg
Sample_Id = YH-254(m-Cl)
Solvent = CHLOROFORM-D
Creation_Time = 24-MAR-2020 20:20:36
Revision_Time = 8-APR-2020 12:15:58
Current_Time = 8-APR-2020 12:16:40

Comment = single_pulse
Data_Format = 1D_REAL
Dim_Size = 13107
Dim_Title = Proton
Dim_Units = [ppm]
Dimensions = X
Site = JNM-ECS400
Spectrometer = DELTA2_NMR

Field_Strength = 9.389766[T] (400 [MHz])
X_Acq_Duration = 2.18365952[s]
X_Domain = 1h
X_Freq = 399.78219838 [MHz]
X_Offset = 5 [ppm]
X_Points = 16384
X_Prescans = 1
X_Resolution = 0.45794685 [Hz]
X_Sweep = 7.5030012 [kHz]
X_Sweep_Clipped = 6.00240096 [kHz]
Irr_Domain = Proton
Irr_Freq = 399.78219838 [MHz]
Irr_Offset = 5 [ppm]
Tri_Domain = Proton
Tri_Freq = 399.78219838 [MHz]
Tri_Offset = 5 [ppm]
Clipped = FALSE
Scans = 8
Total_Scans = 8

Relaxation_Delay = 3 [s]
Recvr_Gain = 48
Temp_Get = 20.1 [dc]
X_90_Width = 6.1 [us]
X_Acq_Time = 2.18365952 [s]
X_Angle = 45 [deg]
X_Atn = 1 [dB]
X_Pulse = 3.05 [us]
Irr_Mode = Off
Tri_Mode = Off
Date_Presat = FALSE
Initial_Wait = 1 [s]
Repetition_Time = 5.18365952 [s]

```

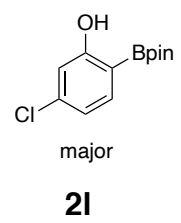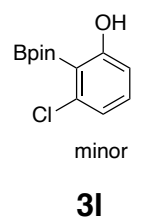

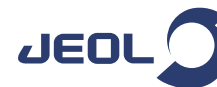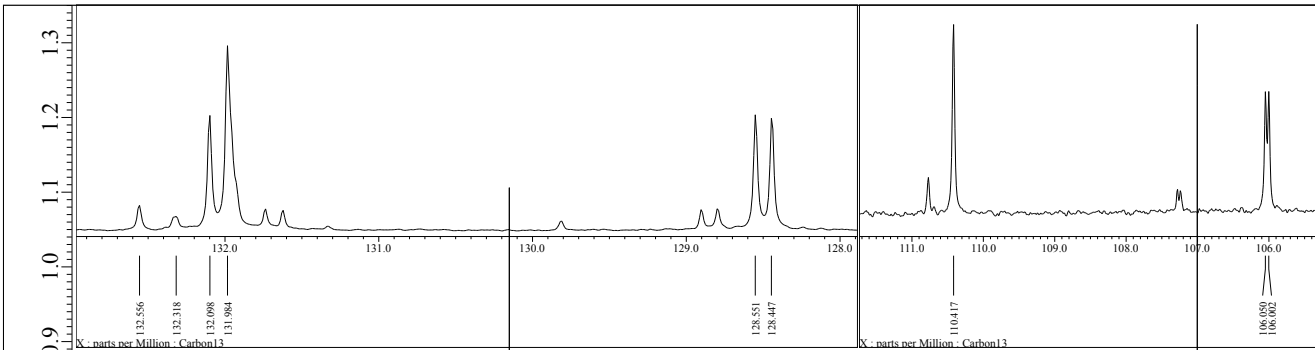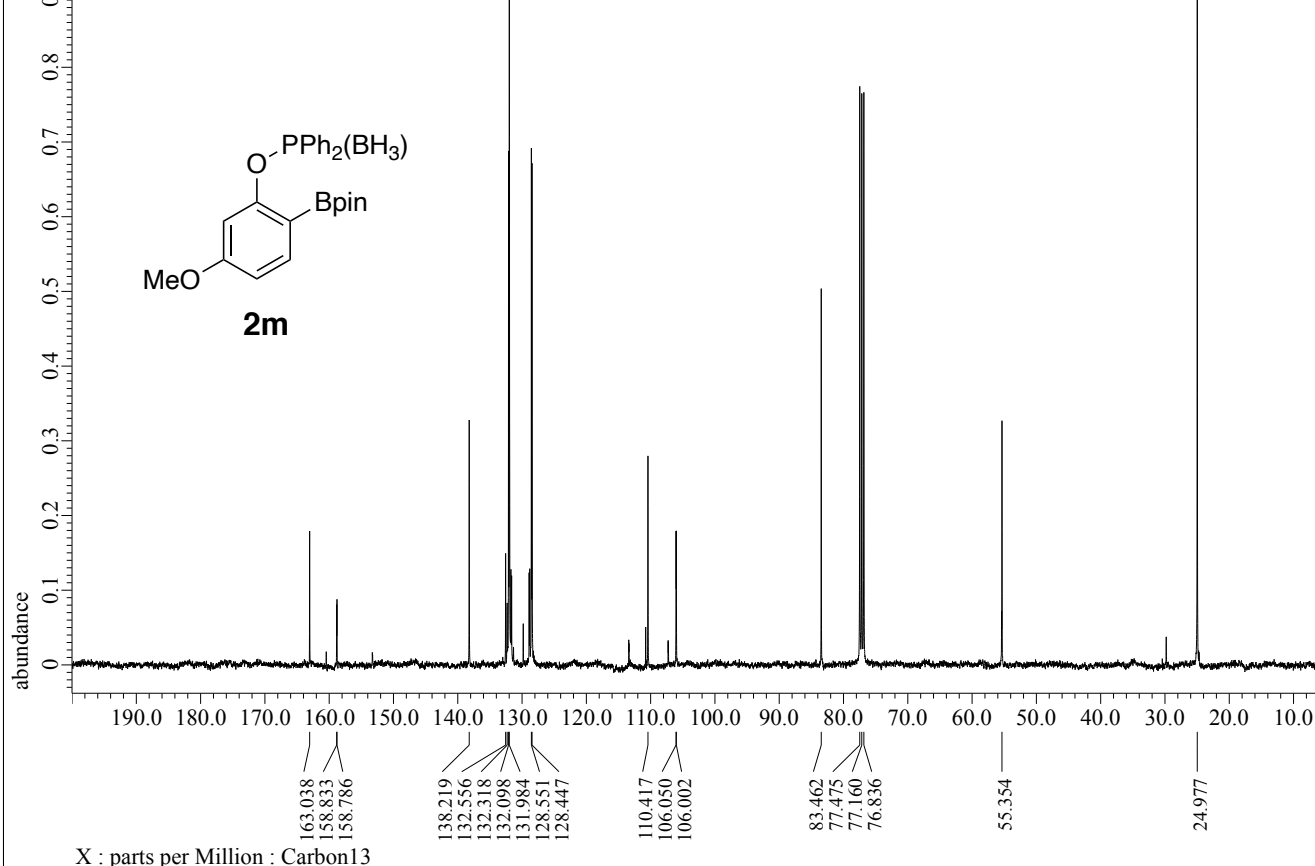

---- PROCESSING PARAMETERS ----  
dc\_balance( 0, FALSE )  
sexp( 2.0[Hz], 0.0[s] )  
trapezoid( 0[%], 0[%], 80[%], 100[%] )  
zerofill( 1, TRUE )  
fft( 1, TRUE, TRUE )  
machinephase  
ppm  
base\_correct( Akima, 5, 0, FALSE, 3, None, FA  
Derived from: YH(m-Ome)\_Carbon-1-1.jdf

Filename = YH(m-Ome)\_Carbon-1-2.jdf  
Author = iwasawa  
Experiment = carbon.jxp  
Sample Id = YH(m-Ome)  
Solvent = CHLOROFORM-D  
Actual\_Start\_Time = 8-APR-2020 13:07:10  
Revision\_Time = 9-APR-2020 15:03:44

Comment = single pulse decoupled ga  
Data Format = 1D REAL  
Dim Size = 26214  
X Domain = Carbon  
Dim Title = Carbon13  
Dim Units = [ppm]  
Dimensions = X  
Site = JNM-ECS400  
Spectrometer = DELTA2\_NMR

Field Strength = 9.389766[T] (400[MHz])  
X Acq\_Duration = 1.0433312[s]  
X Domain = 13C  
X Freq = 100.52530333[MHz]  
X Offset = 100[ppm]  
X Points = 32768  
X Prescans = 4  
X Resolution = 0.95846665[Hz]  
X Sweep = 31.40703518[kHz]  
X Sweep\_Clippped = 25.12562814[kHz]  
Irr Domain = Proton  
Irr Freq = 399.78219838[MHz]  
Irr Offset = 5[ppm]  
Clipped = TRUE  
Scans = 1024  
Total\_Scans = 1024

Relaxation\_Delay = 2[s]  
Recvr Gain = 60  
Temp Get = 22[dC]  
X 90\_Width = 11.1[us]  
X Acq\_Time = 1.0433312[s]  
X Angle = 30[deg]  
X Atn = 4.5[dB]  
X Pulse = 3.7[us]  
Irr Atn Dec = 26.507[dB]  
Irr Atn Noe = 26.507[dB]  
Irr Noise = WALTZ  
Irr Pwidth = 0.115[ms]  
Decoupling = TRUE  
Initial\_Wait = 1[s]  
Noe = TRUE  
Noe Time = 2[s]  
Repetition\_Time = 3.04333312[s]





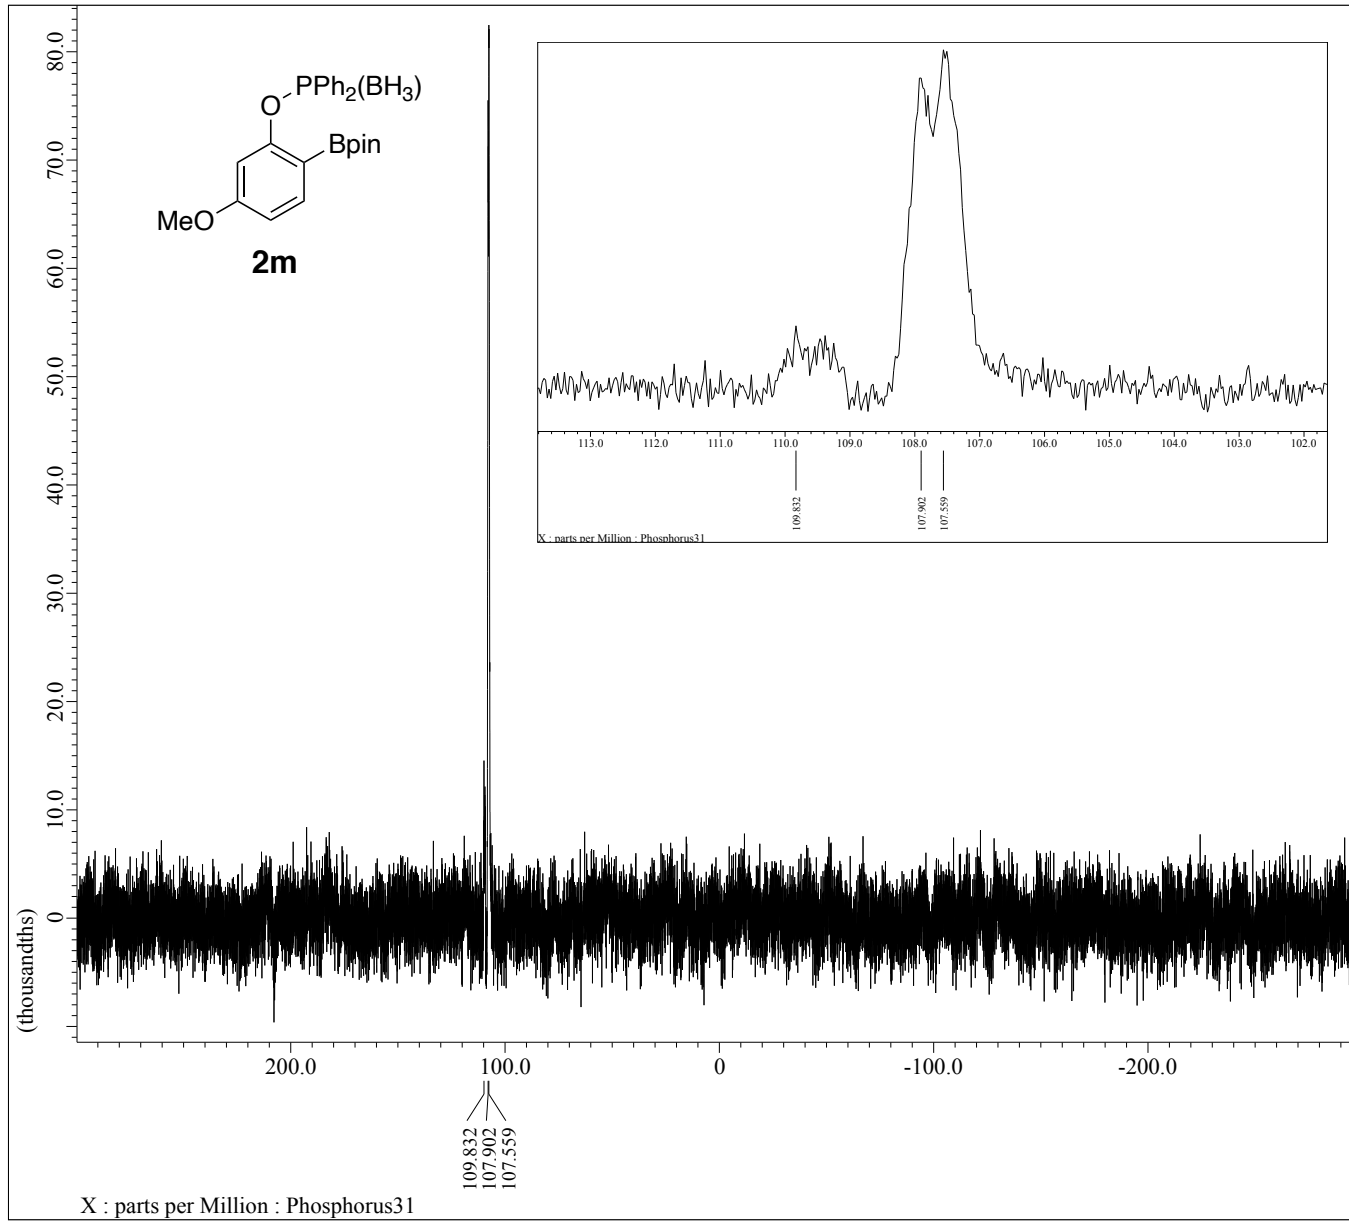

```

---- PROCESSING PARAMETERS ----
sexp( 2.0[Hz], 0.0[s] )
trapezoid( 0[%], 0[%], 80[%], 100[%] )
zerofill( 1, TRUE )
fft( 1, TRUE, TRUE )
machinephase
ppm
base_correct( Akima, 5, 0, FALSE, 3, None, FA
Derived from: YH(m-OMe)_31P_1Hdec-1-1.jdf

```

```

Filename      = YH(m-OMe)_31P_1Hdec
Author        = delta
Experiment    = single_pulse_dec.j
Sample_Id     = YH(m-OMe)
Solvent       = CHLOROFORM-D
Actual_Start_Time = 7-APR-2020 22:03:
Revision_Time = 8-APR-2020 11:56:

```

```

Comment       = single pulse decou
Data Format    = 1D REAL
Dim Size      = 26214
X Domain      = Phosphorus31
Dim Title     = Phosphorus31
Dim Units     = [ppm]
Dimensions    = X
Spectrometer  = JNM-ECZ500R/S1

```

```

Field Strength = 11.62926421[T] (50
X Acq Duration = 0.18874368[s]
X Domain       = 31P
X Freq         = 200.43293989[MHz]
X Offset       = 0[ppm]
X Points       = 32768
X Prescans     = 4
X Resolution   = 5.29819065[Hz]
X Sweep       = 173.61111111[kHz]
X Sweep Clipped = 138.88888889[kHz]
Irr Domain     = Proton
Irr Freq       = 495.13191398[MHz]
Irr Offset     = 5[ppm]
Clipped        = FALSE
Scans          = 64
Total_Scans    = 64

```

```

Relaxation_Delay = 1[s]
Recvr Gain       = 66
Temp_Get         = 20.5[dC]
X 90 Width      = 19.78[us]
X Acq Time       = 0.18874368[s]
X Angle         = 30[deg]
X Atn            = 9.4[dB]
X Pulse         = 6.59333333[us]
Irr Atn Dec     = 23.948[dB]
Irr Atn Dec Calc = 23.948[dB]
Irr Atn Dec Default_Calc = 23.948[dB]
Irr Atn Noe     = 23.948[dB]
Irr Dec Bandwidth_Hz = 5.97826087[kHz]
Irr Dec Bandwidth_Ppm = 12.07407703[ppm]
Irr Dec Freq    = 495.13191398[MHz]
Irr Dec Merit Factor = 2.2
Irr Decoupling  = TRUE
Irr Noe         = TRUE
Irr Noise       = WALTZ

```

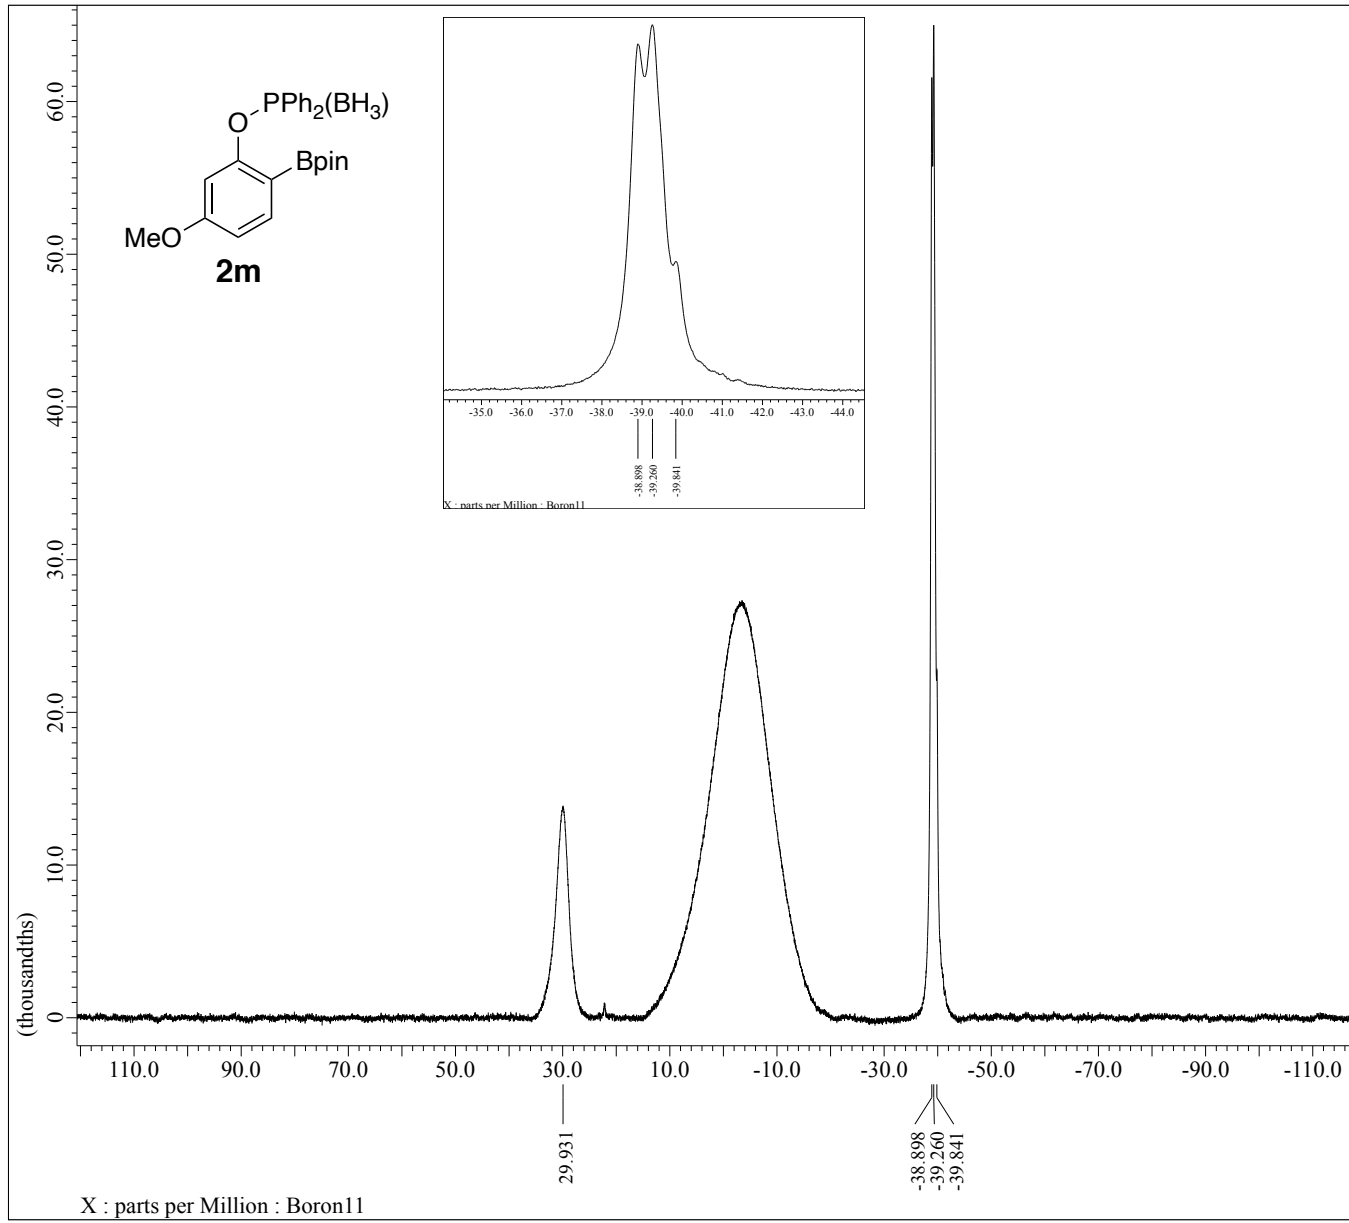

```

---- PROCESSING PARAMETERS ----
sexp( 2.0[Hz], 0.0[s] )
trapezoid( 0[%], 0[%], 80[%], 100[%] )
zerofill( 1, TRUE )
fft( 1, TRUE, TRUE )
machinephase
ppm
phase( 17.25, 0, 38.11849[%] )
base_correct( Akima, 5, 0, FALSE, 3, None, FA
Derived from: YH(m-OMe)_11B_1Hdec-1-1.jdf

```

```

Filename           = YH(m-OMe)_11B_1Hde
Author             = delta
Experiment         = single_pulse_dec.j
Sample_Id          = YH(m-OMe)
Solvent            = CHLOROFORM-D
Actual_Start_Time  = 8-APR-2020 10:34:
Revision_Time      = 8-APR-2020 12:00:

Comment           = single_pulse decou
Data_Format       = 1D REAL
Dim_Size          = 26214
X_Domain          = Boron11
Dim_Title         = Boron11
Dim_Units         = [ppm]
Dimensions        = X
Spectrometer      = JNM-ECZ500R/S1

Field_Strength    = 11.62926421[T] (50
X_Acq_Duration    = 0.66060288[s]
X_Domain          = 11B
X_Freq            = 158.85814241[MHz]
X_Offset          = 0[ppm]
X_Points          = 32768
X_Prescans        = 4
X_Resolution      = 1.51376876[Hz]
X_Sweep           = 49.6031746[kHz]
X_Sweep_Clippped  = 39.68253968[kHz]
Irr_Domain        = Proton
Irr_Freq          = 495.13191398[MHz]
Irr_Offset        = 5[ppm]
Clipped           = FALSE
Scans             = 300
Total_Scans       = 300

Relaxation_Delay  = 2[s]
Recvr_Gain        = 56
Temp_Get          = 20.8[dC]
X_90_Width        = 36.17[us]
X_Acq_Time        = 0.66060288[s]
X_Angle           = 30[deg]
X_Atn             = 12[dB]
X_Pulse           = 12.05666667[us]
Irr_Atn_Dec       = 23.948[dB]
Irr_Atn_Dec_Calc  = 23.948[dB]
Irr_Atn_Dec_Default_Calc = 23.948[dB]
Irr_Atn_Noise     = 23.948[dB]
Irr_Dec_Bandwidth_Hz = 5.97826087[kHz]
Irr_Dec_Bandwidth_Ppm = 12.07407703[ppm]
Irr_Dec_Freq      = 495.13191398[MHz]
Irr_Dec_Merit_Factor = 2.2
Irr_Decoupling    = TRUE
Irr_Noise         = TRUE
Irr_Noise         = WALTZ

```

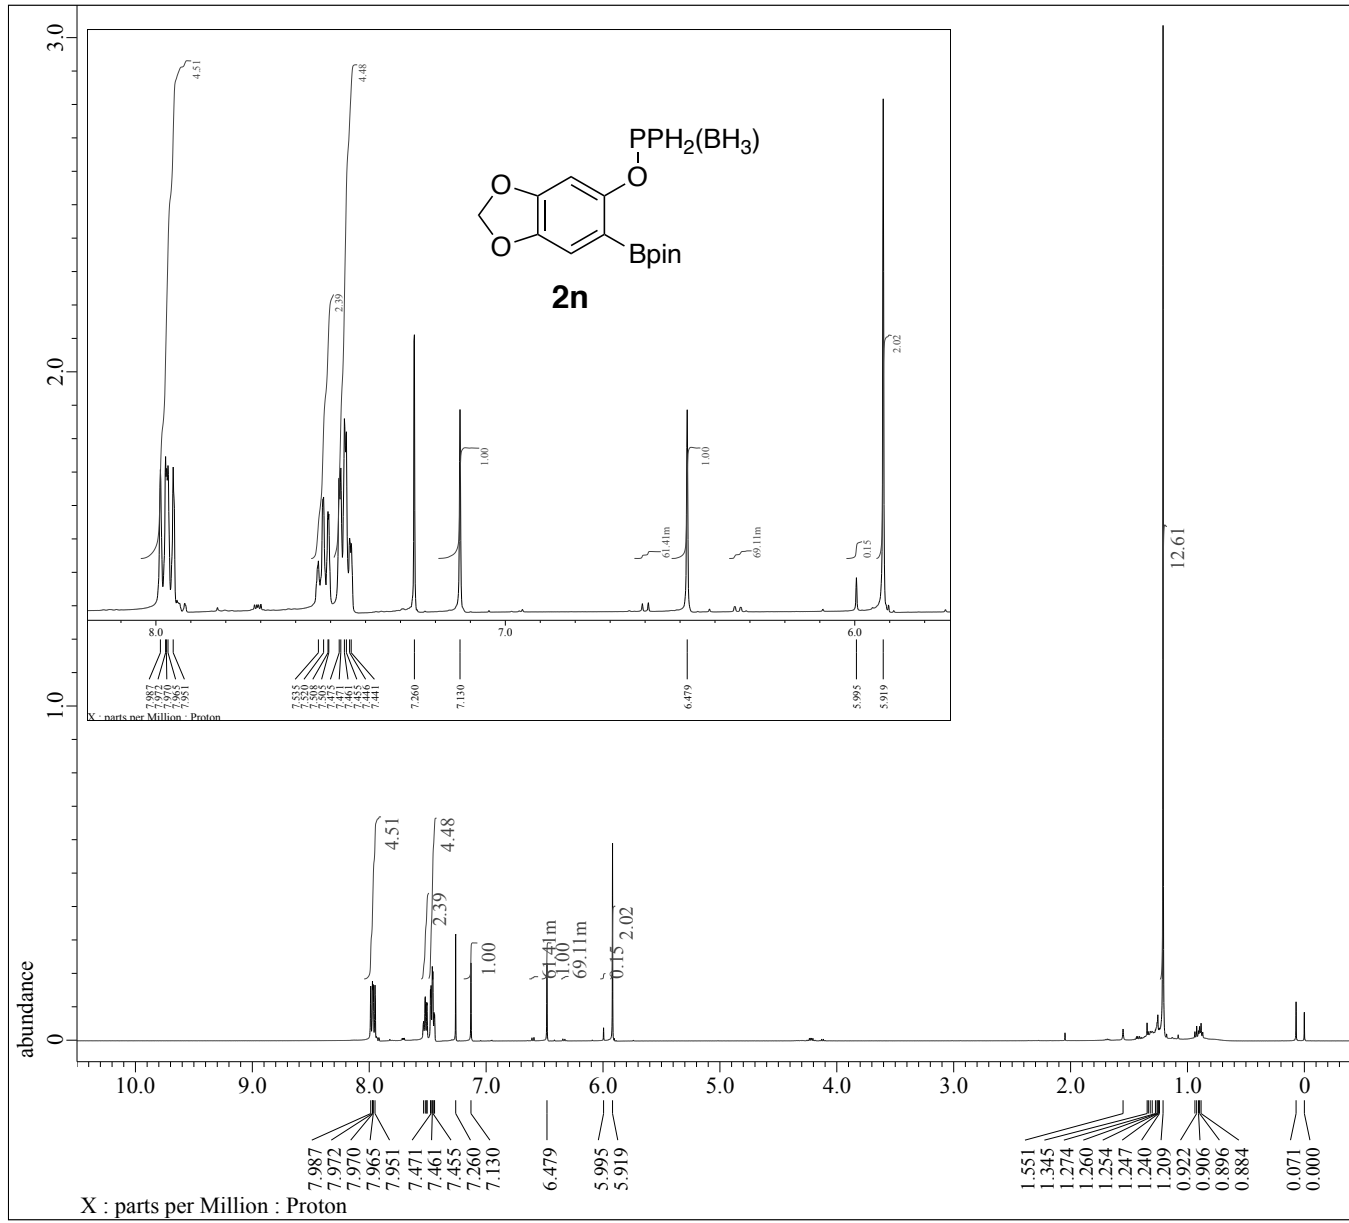

---- PROCESSING PARAMETERS ----  
 sexp( 0.2[Hz], 0.0[s] )  
 trapezoid( 0[%], 0[%], 80[%], 100[%] )  
 zerofill( 1, TRUE )  
 fft( 1, TRUE, TRUE )  
 machinephase  
 ppm  
 Derived from: YH-295-f1\_Proton-1-1.jdf

Filename = YH-295-f1\_Proton-1-2.  
 Author = delta  
 Experiment = proton.jxp  
 Sample\_Id = YH-295-f1  
 Solvent = CHLOROFORM-D  
 Actual\_Start\_Time = 2-APR-2020 21:18:43  
 Revision\_Time = 7-APR-2020 10:29:22

Comment = single pulse  
 Data Format = 1D COMPLEX  
 Dim\_Size = 13107  
 X\_Domain = Proton  
 Dim\_Title = Proton  
 Dim\_Units = [ppm]  
 Dimensions = X  
 Spectrometer = JNM-ECZ500R/s1

Field Strength = 11.62926421[T] (500[M]  
 X\_Acq\_Duration = 1.76422912[s]  
 X\_Domain = 1H  
 X\_Freq = 495.13191398[MHz]  
 X\_Offset = 5[ppm]  
 X\_Points = 16384  
 X\_Prescans = 1  
 X\_Resolution = 0.5668198 [Hz]  
 X\_Sweep = 9.28677563 [kHz]  
 X\_Sweep\_Clippped = 7.42942051 [kHz]  
 Irr\_Domain = Proton  
 Irr\_Freq = 495.13191398 [MHz]  
 Irr\_Offset = 5 [ppm]  
 Tri\_Domain = Proton  
 Tri\_Freq = 495.13191398 [MHz]  
 Tri\_Offset = 5 [ppm]  
 Clipped = FALSE  
 Scans = 8  
 Total\_Scans = 8

Relaxation\_Delay = 5[s]  
 Recvr\_Gain = 36  
 Temp\_Get = 20.8 [dC]  
 X\_90\_Width = 9.58 [us]  
 X\_Acq\_Time = 1.76422912[s]  
 X\_Angle = 45 [deg]  
 X\_Atn = 4.3 [dB]  
 X\_Pulse = 4.79 [us]  
 Irr\_Mode = Off  
 Tri\_Mode = Off  
 Dante\_Loop = FALSE  
 Dante\_Presat = FALSE  
 Decimation\_Rate = 0  
 Initial\_Wait = 1[s]  
 Phase = {0, 90, 270, 180, 180  
 Presat\_Time = 5[s]

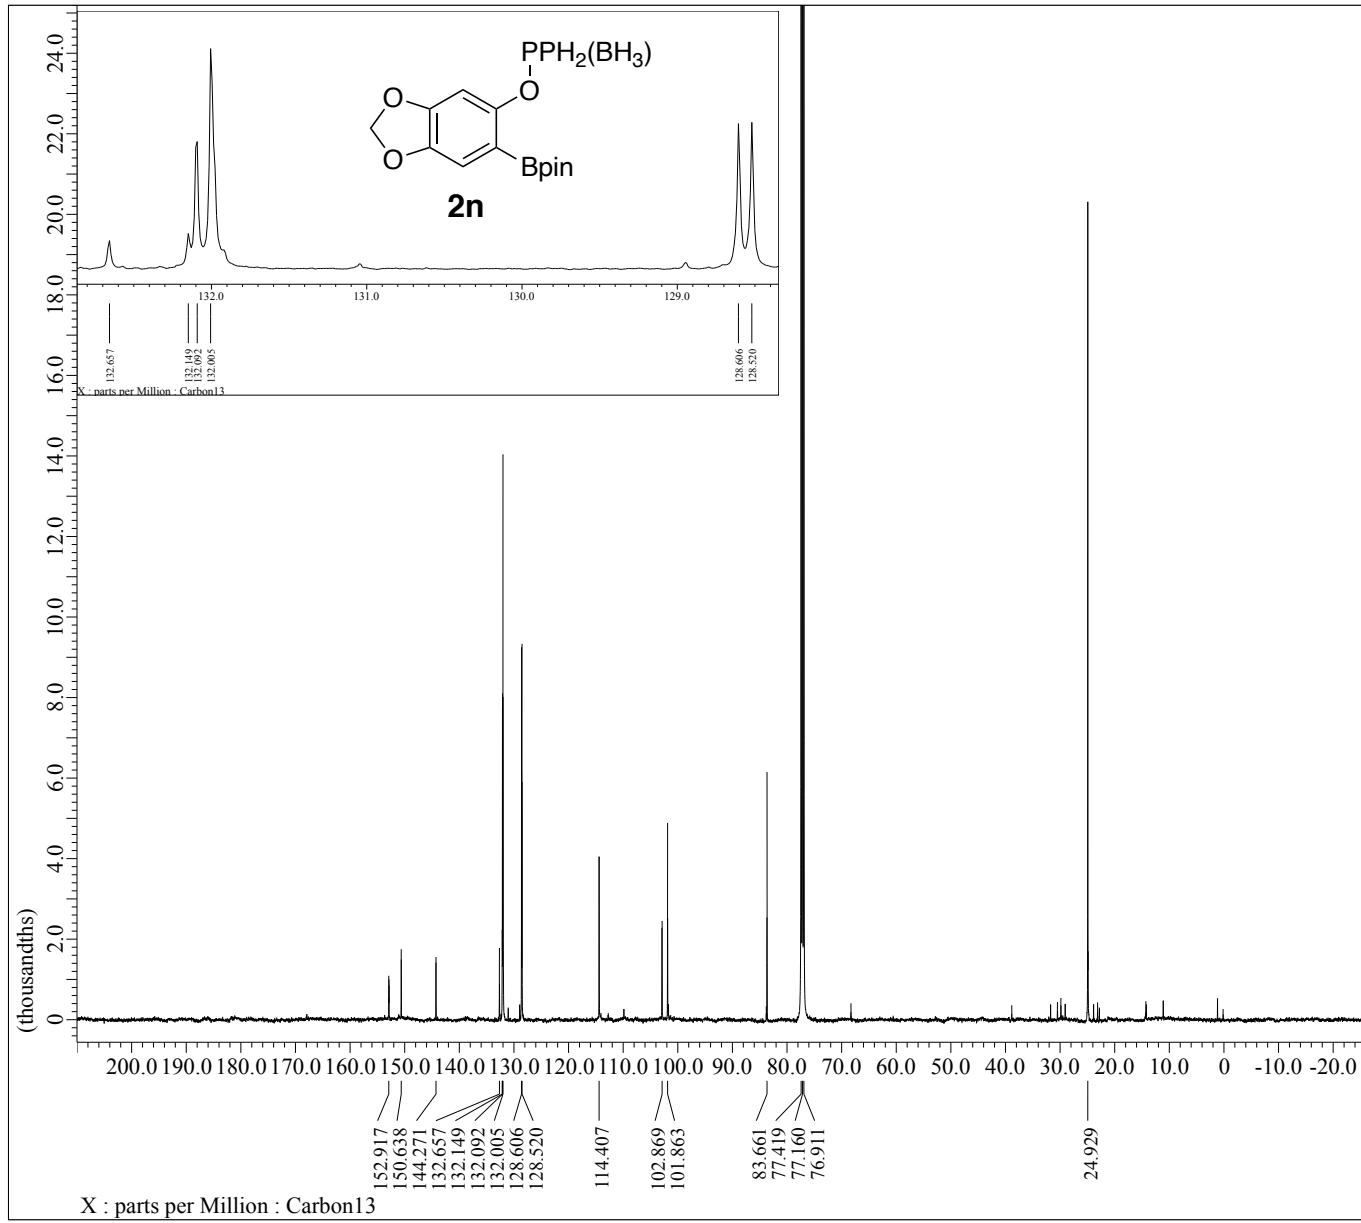

```

---- PROCESSING PARAMETERS ----
sexp( 2.0[Hz], 0.0[s] )
trapezoid( 0[%], 0[%], 80[%], 100[%] )
zerofill( 1, TRUE )
fft( 1, TRUE, TRUE )
machinephase
ppm
base_correct( Akima, 5, 0, FALSE, 3, None, FA
Derived from: YH-295-f1_Carbon-1-1.jdf

```

```

Filename           = YH-295-f1_Carbon-1
Author            = delta
Experiment        = carbon.jxp
Sample_Id         = YH-295-f1
Solvent           = CHLOROFORM-D
Actual_Start_Time = 5-APR-2020 00:51:
Revision_Time     = 9-APR-2020 10:39:

Comment          = single pulse decou
Data_Format      = 1D REAL
Dim_Size         = 26214
X_Domain         = Carbon13
Dim_Title        = Carbon13
Dim_Units        = [ppm]
Dimensions       = X
Spectrometer     = JNM-ECZ500R/S1

Field_Strength   = 11.62926421[T] (50
X_Acq_Duration   = 0.8388608[s]
X_Domain         = 13C
X_Freq           = 124.5010059[MHz]
X_Offset         = 100[ppm]
X_Points         = 32768
X_Prescans       = 4
X_Resolution     = 1.1920929[Hz]
X_Sweep          = 39.0625[kHz]
X_Sweep_Clipped = 31.25[kHz]
Irr_Domain       = Proton
Irr_Freq         = 495.13191398[MHz]
Irr_Offset       = 5[ppm]
Clipped          = FALSE
Scans            = 5000
Total_Scans      = 5000

Relaxation_Delay = 2[s]
Recvr_Gain       = 56
Temp_Get         = 20.3[dC]
X_90_Width      = 9.61[us]
X_Acq_Time       = 0.8388608[s]
X_Angle         = 30[deg]
X_Atn           = 10[dB]
X_Pulse         = 3.20333333[us]
Irr_Atn_Dec     = 23.948[dB]
Irr_Atn_Dec_Calc = 23.948[dB]
Irr_Atn_Dec_Default_Calc = 23.948[dB]
Irr_Atn_Noise   = 23.948[dB]
Irr_Dec_Bandwidth_Hz = 5.97826087[kHz]
Irr_Dec_Bandwidth_Ppm = 12.07407703[ppm]
Irr_Dec_Freq    = 495.13191398[MHz]
Irr_Dec_Merit_Factor = 2.2
Irr_Decoupling  = TRUE
Irr_Noise       = TRUE
Irr_Noise       = WALTZ

```

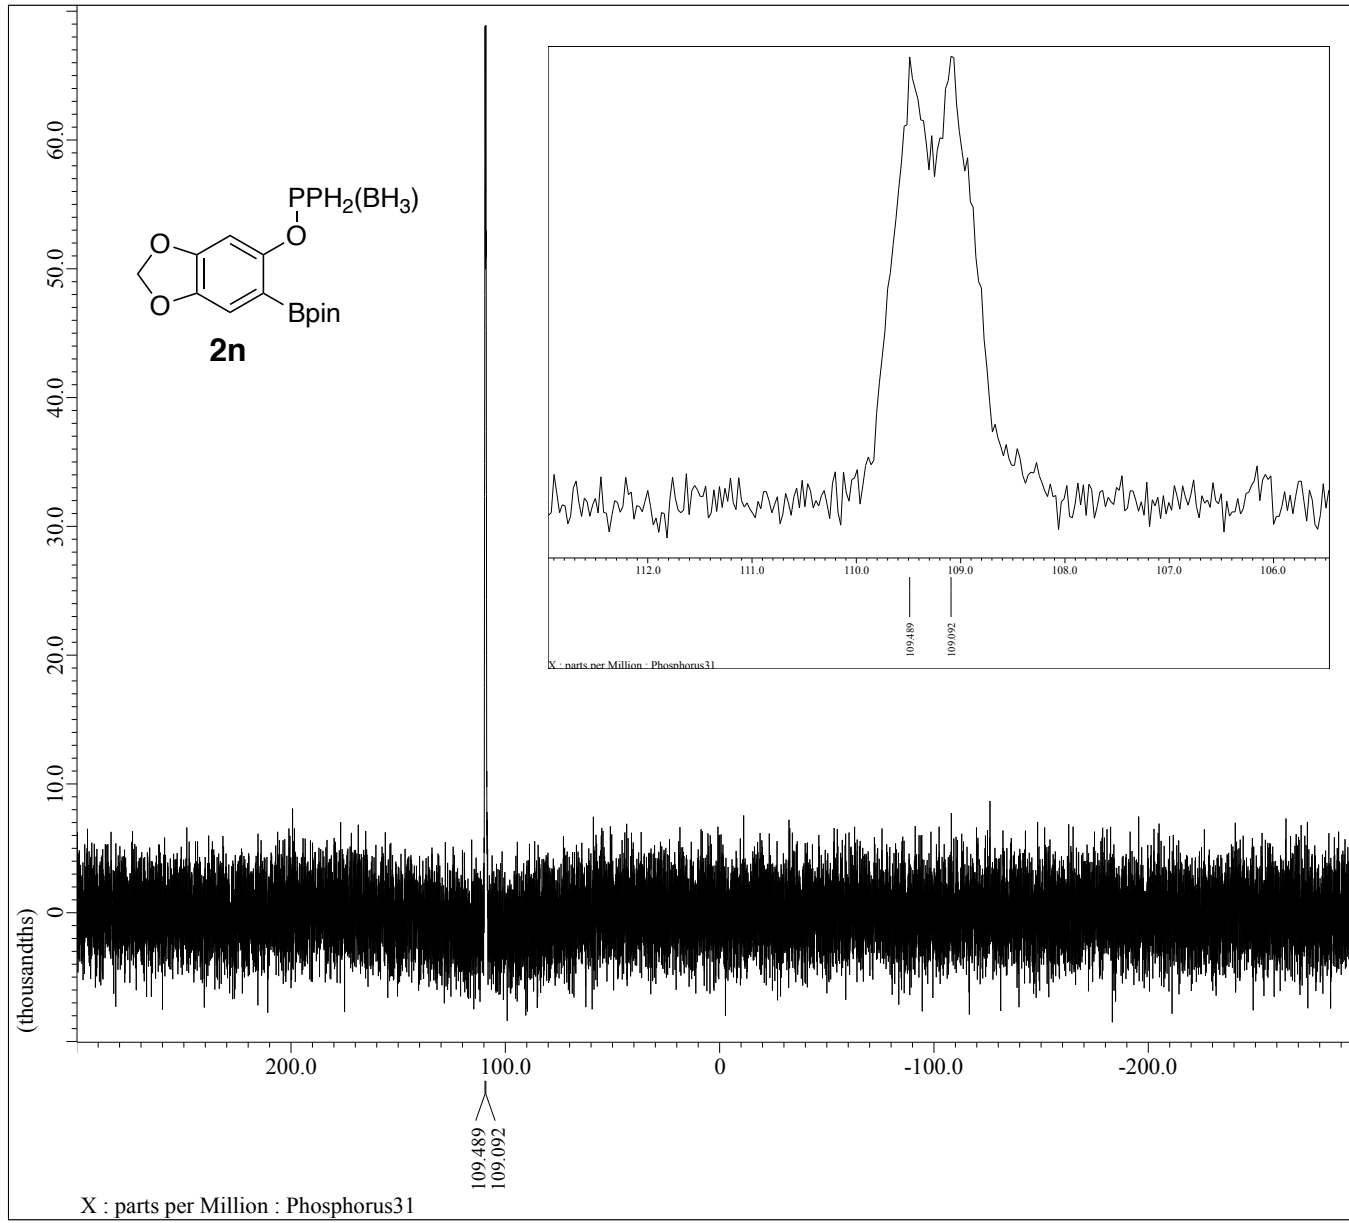

---- PROCESSING PARAMETERS ----  
 sexp( 2.0[Hz], 0.0[s] )  
 trapezoid( 0[%], 0[%], 80[%], 100[%] )  
 zerofill( 1, TRUE )  
 fft( 1, TRUE, TRUE )  
 machinephase  
 ppm  
 Derived from: YH-295-f1\_31P\_1Hdec-1-1.jdf

|                          |                       |
|--------------------------|-----------------------|
| Filename                 | = YH-295-f1_31P_1Hdec |
| Author                   | = delta               |
| Experiment               | = single_pulse_dec.j  |
| Sample Id                | = YH-295-f1           |
| Solvent                  | = CHLOROFORM-D        |
| Actual_Start_Time        | = 3-APR-2020 12:45:   |
| Revision_Time            | = 7-APR-2020 21:40:   |
| Comment                  | = single_pulse decou  |
| Data Format              | = 1D COMPLEX          |
| Dim Size                 | = 26214               |
| X Domain                 | = Phosphorus31        |
| Dim Title                | = Phosphorus31        |
| Dim Units                | = [ppm]               |
| Dimensions               | = X                   |
| Spectrometer             | = JNM-ECZ500R/S1      |
| Field Strength           | = 11.62926421[T] (50  |
| X Acq Duration           | = 0.18874368[s]       |
| X Domain                 | = 31P                 |
| X Freq                   | = 200.43293989[MHz]   |
| X Offset                 | = 0[ppm]              |
| X Points                 | = 32768               |
| X Prescans               | = 4                   |
| X Resolution             | = 5.29819065[Hz]      |
| X Sweep                  | = 173.61111111[kHz]   |
| X Sweep Clipped          | = 138.88888889[kHz]   |
| Irr Domain               | = Proton              |
| Irr Freq                 | = 495.13191398[MHz]   |
| Irr Offset               | = 5[ppm]              |
| Clipped                  | = FALSE               |
| Scans                    | = 64                  |
| Total_Scans              | = 64                  |
| Relaxation_Delay         | = 1[s]                |
| Recvr Gain               | = 66                  |
| Temp_Get                 | = 20.7[dC]            |
| X 90_Width               | = 19.78[us]           |
| X Acq Time               | = 0.18874368[s]       |
| X Angle                  | = 30[deg]             |
| X Atn                    | = 9.4[dB]             |
| X Pulse                  | = 6.59333333[us]      |
| Irr Atn Dec              | = 23.948[dB]          |
| Irr Atn Dec Calc         | = 23.948[dB]          |
| Irr Atn Dec Default_Calc | = 23.948[dB]          |
| Irr Atn Noe              | = 23.948[dB]          |
| Irr Dec Bandwidth Hz     | = 5.97826087[kHz]     |
| Irr Dec Bandwidth_Ppm    | = 12.07407703[ppm]    |
| Irr Dec Freq             | = 495.13191398[MHz]   |
| Irr Dec Merit Factor     | = 2.2                 |
| Irr Decoupling           | = TRUE                |
| Irr Noe                  | = TRUE                |
| Irr Noise                | = WALTZ               |

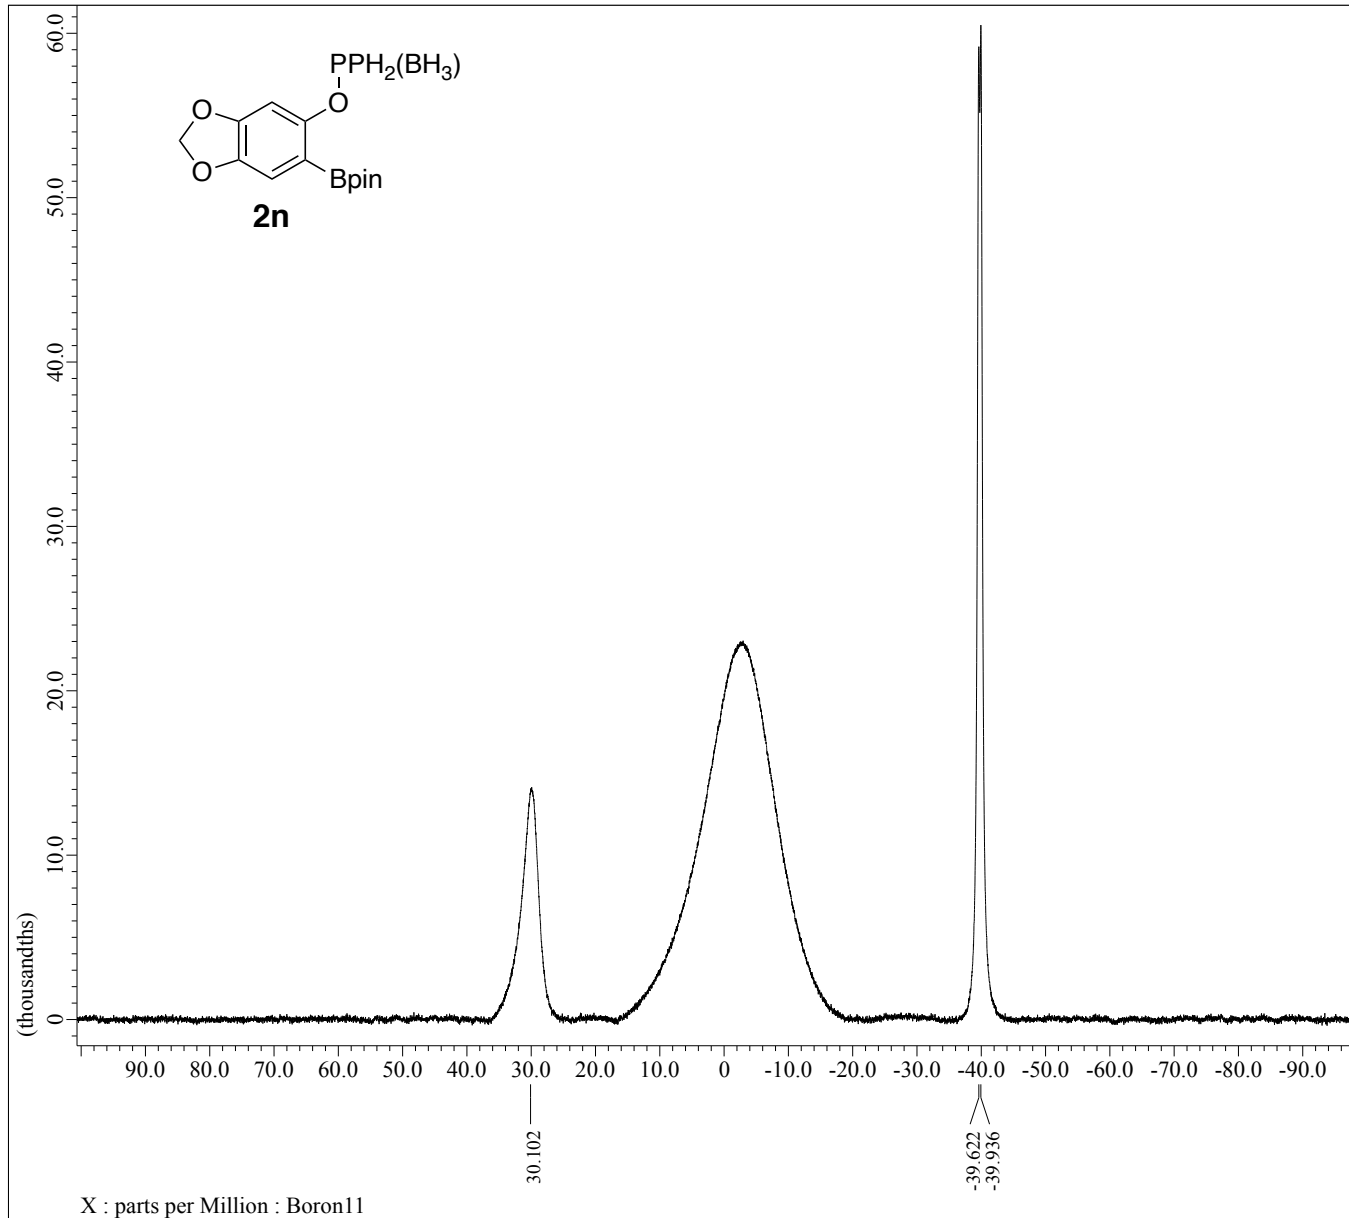

```

---- PROCESSING PARAMETERS ----
sexp( 2.0[Hz], 0.0[s] )
trapezoid( 0[%], 0[%], 80[%], 100[%] )
zerofill( 1, TRUE )
fft( 1, TRUE, TRUE )
machinephase
ppm
phase( 0, -40, 38.22531[%] )
base_correct( Akima, 5, 0, FALSE, 3, None, FA
Derived from: YH-295-f1_11B_1Hdec-1-1.jdf

```

```

Filename      = YH-295-f1_11B_1Hde
Author        = delta
Experiment    = single_pulse_decou
Sample_Id     = YH-295-f1
Solvent       = CHLOROFORM-D
Actual_Start_Time = 3-APR-2020 13:04:
Revision_Time  = 7-APR-2020 13:01:

Comment       = single_pulse decou
Data_Format   = 1D REAL
Dim_Size      = 26214
X_Domain      = Boron11
Dim_Title     = Boron11
Dim_Units     = [ppm]
Dimensions    = X
Spectrometer  = JNM-ECZ500R/S1

Field Strength = 11.62926421[T] (50
X_Acq_Duration = 0.66060288[s]
X_Domain       = 11B
X_Freq         = 158.85814241[MHz]
X_Offset       = 0[ppm]
X_Points       = 32768
X_Prescans     = 4
X_Resolution   = 1.51376876[Hz]
X_Sweep        = 49.6031746[kHz]
X_Sweep_Clippped = 39.68253968[kHz]
Irr_Domain     = Proton
Irr_Freq       = 495.13191398[MHz]
Irr_Offset     = 5[ppm]
Clipped        = TRUE
Scans          = 500
Total_Scans    = 500

Relaxation_Delay = 2[s]
Recvr Gain       = 56
Temp_Get         = 20.6[dC]
X_90_Width      = 36.17[us]
X_Acq_Time      = 0.66060288[s]
X_Angle         = 30[deg]
X_Atn           = 12[dB]
X_Pulse         = 12.05666667[us]
Irr_Atn_Dec     = 23.948[dB]
Irr_Atn_Dec_Calc = 23.948[dB]
Irr_Atn_Dec_Default_Calc = 23.948[dB]
Irr_Atn_Noise  = 23.948[dB]
Irr_Dec_Bandwidth_Hz = 5.97826087[kHz]
Irr_Dec_Bandwidth_Ppm = 12.07407703[ppm]
Irr_Dec_Freq    = 495.13191398[MHz]
Irr_Dec_Merit_Factor = 2.2
Irr_Decoupling = TRUE
Irr_Noise      = TRUE
Irr_Noise      = WALTZ

```

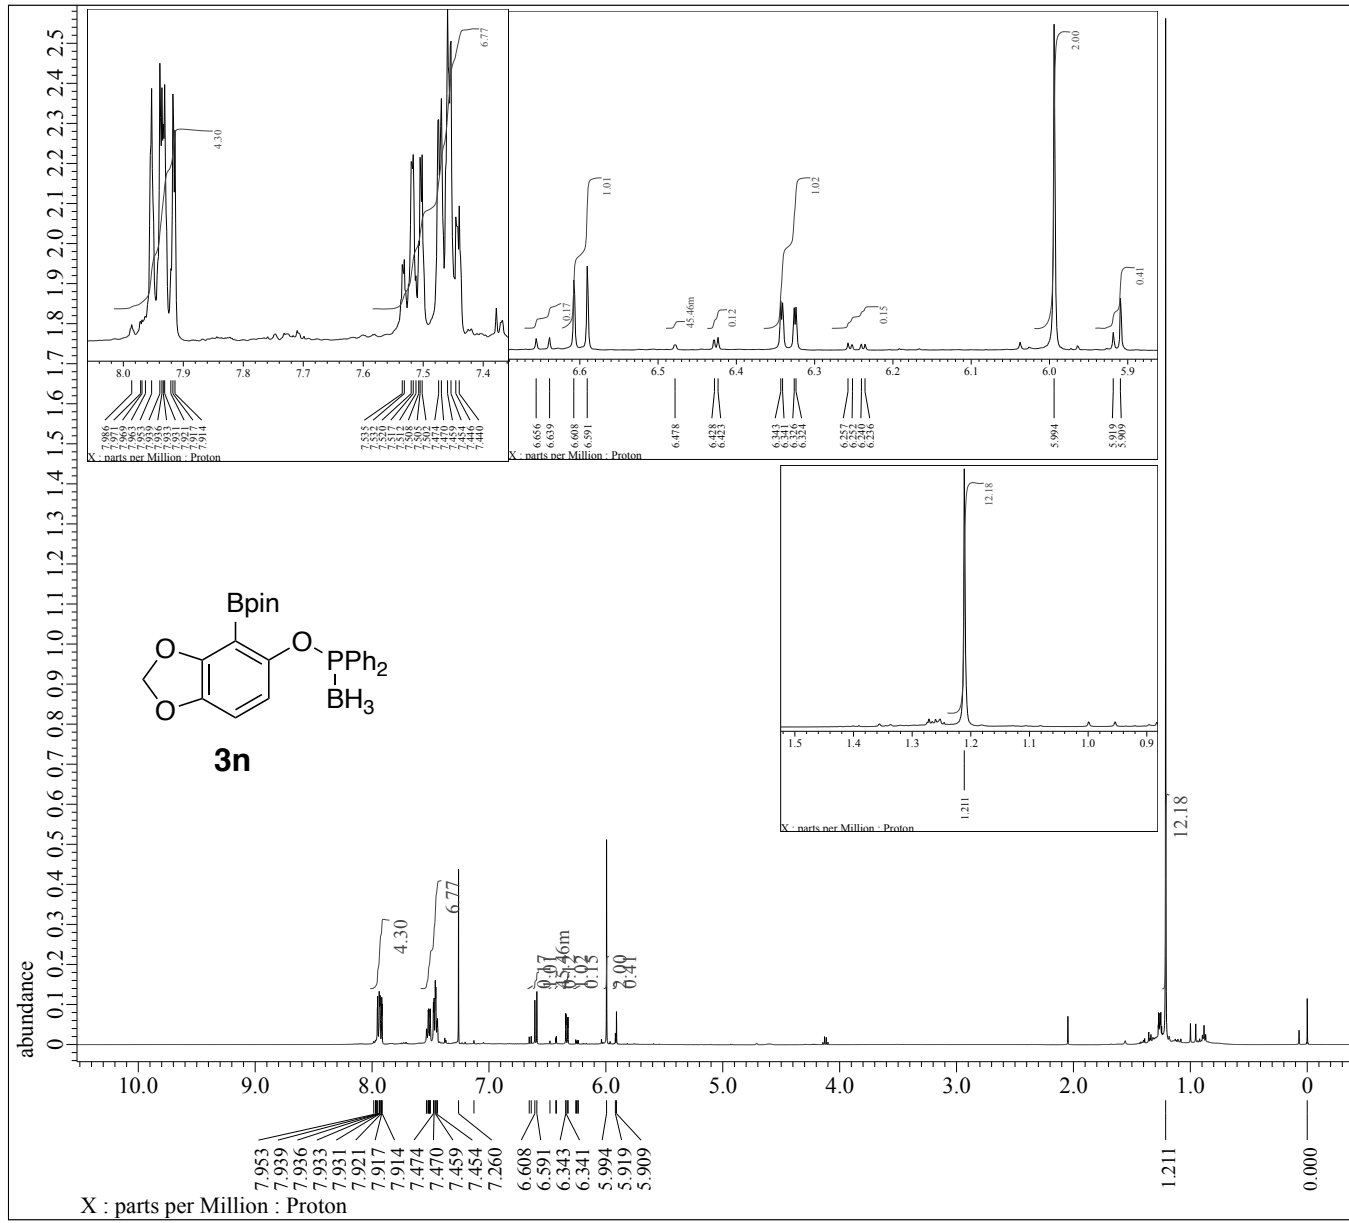

```

---- PROCESSING PARAMETERS ----
sexp( 0.2[Hz], 0.0[s] )
trapezoid( 0[%], 0[%], 80[%], 100[%] )
zerofill( 1, TRUE )
fft( 1, TRUE, TRUE )
machinephase
ppm
phase( 22.5, 0, 74.75202[%] )
base_correct( Akima, 5, 0, FALSE, 3, None, FA
Derived from: YH-295-f2_Proton-1-1.jdf

```

```

Filename      = YH-295-f2_Proton-1-2.
Author        = delta
Experiment    = proton.jxp
Sample Id     = YH-295-f2
Solvent       = CHLOROFORM-D
Actual_Start_Time = 2-APR-2020 21:24:39
Revision_Time = 14-APR-2020 16:14:47

```

```

Comment       = single pulse
Data Format    = 1D REAL
Dim Size      = 13107
X Domain      = Proton
Dim Title     = Proton
Dim Units     = [ppm]
Dimensions    = X
Spectrometer  = JNM-ECZ500R/s1

```

```

Field Strength = 11.62926421[T] (500[M
X Acq Duration = 1.76422912[s]
X Domain       = 1H
X Freq         = 495.13191398[MHz]
X Offset       = 5[ppm]
X Points       = 16384
X Prescans     = 1
X Resolution   = 0.5668198 [Hz]
X Sweep       = 9.28677563[kHz]
X Sweep Clipped = 7.42942051[kHz]
Irr Domain     = Proton
Irr Freq       = 495.13191398[MHz]
Irr Offset     = 5[ppm]
Tri Domain     = Proton
Tri Freq       = 495.13191398[MHz]
Tri Offset     = 5[ppm]
Clipped        = FALSE
Scans          = 8
Total_Scans    = 8

```

```

Relaxation_Delay = 5[s]
Recvr Gain       = 36
Temp_Get         = 20.7 [dC]
X 90 Width      = 9.58 [us]
X Acq Time      = 1.76422912[s]
X Angle         = 45 [deg]
X Atn           = 4.3 [dB]
X Pulse         = 4.79 [us]
Irr Mode        = Off
Tri Mode        = Off
Dante Loop      = FALSE
Dante_Presat   = FALSE
Decimation Rate = 0
Initial_Wait    = 1[s]
Phase           = {0, 90, 270, 180, 180
Presat_Time     = 5[s]

```

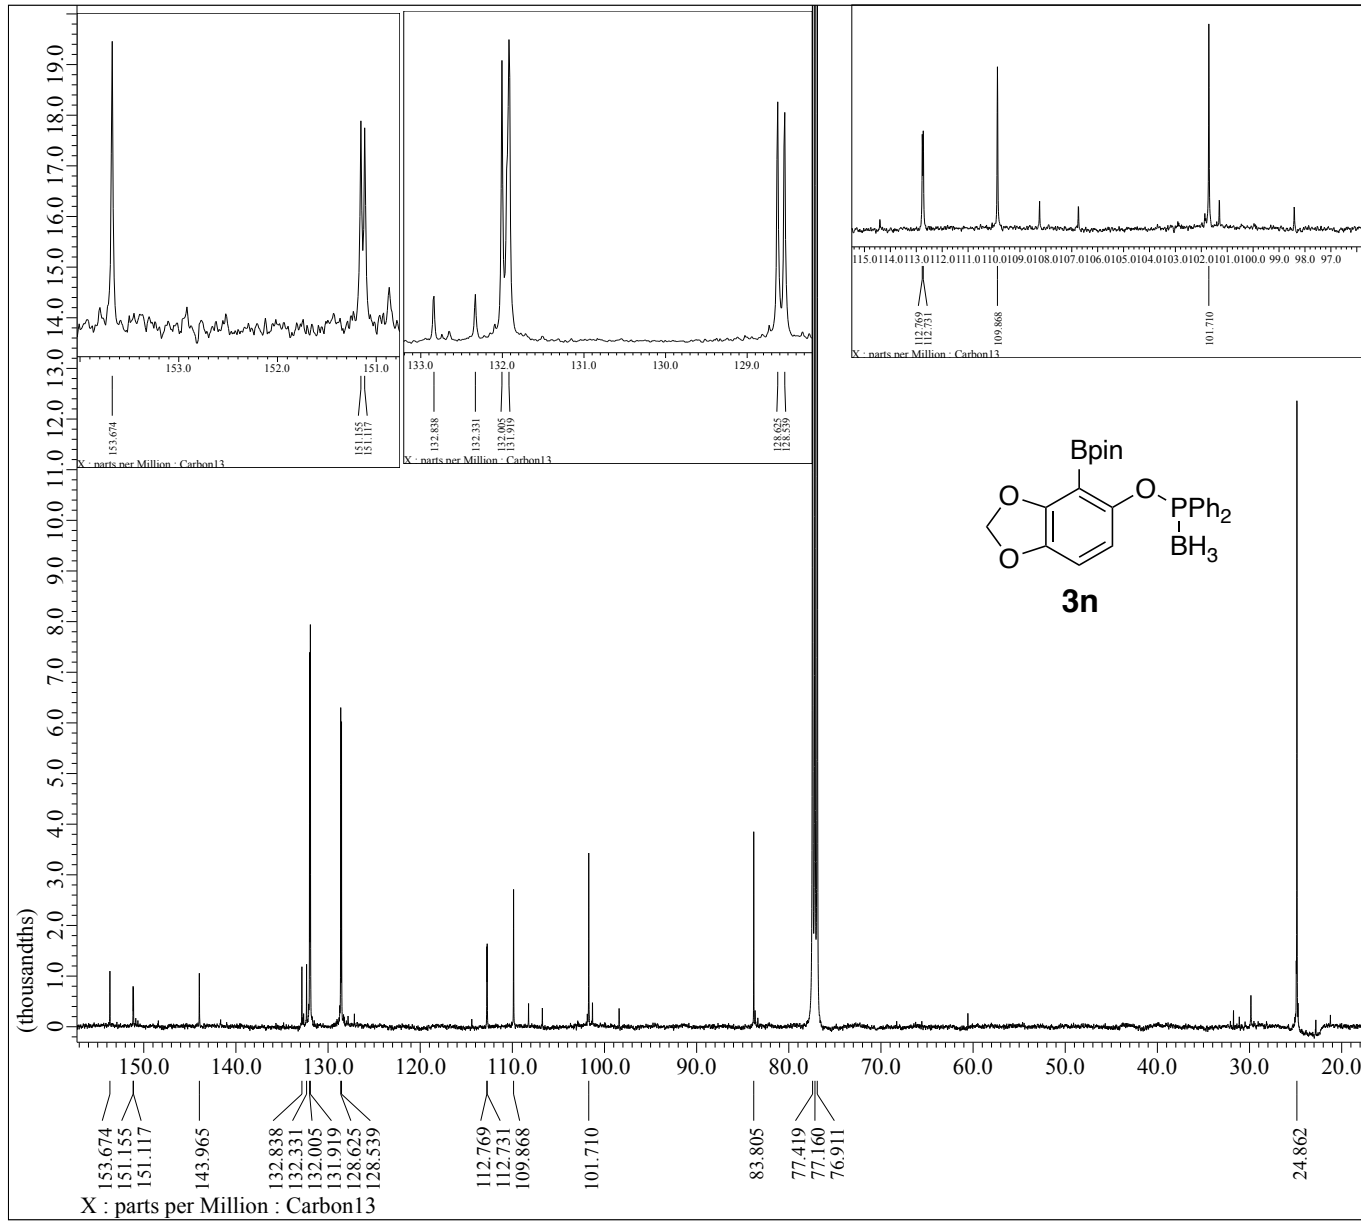

```

---- PROCESSING PARAMETERS ----
sexp( 2.0[Hz], 0.0[s] )
trapezoid( 0[%], 0[%], 80[%], 100[%] )
zerofill( 1, TRUE )
fft( 1, TRUE, TRUE )
machinephase
ppm
reference( 77.10626[ppm], 77.16[ppm] )
base_correct( Akima, 5, 0, FALSE, 3, None, FA
Derived from: YH-295-f2_Carbon-1-1.jdf

```

```

Filename           = YH-295-f2_Carbon-1
Author            = delta
Experiment        = carbon.jxp
Sample_Id         = YH-295-f2
Solvent           = CHLOROFORM-D
Actual_Start_Time = 5-APR-2020 04:55:
Revision_Time     = 9-APR-2020 10:49:

Comment           = single pulse decou
Data Format       = 1D REAL
Dim_Size         = 26214
X_Domain         = Carbon13
Dim Title        = Carbon13
Dim Units        = [ppm]
Dimensions       = X
Spectrometer     = JNM-ECZ500R/S1

Field Strength    = 11.62926421[T] (50
X_Acq_Duration   = 0.8388608[s]
X_Domain         = 13C
X_Freq           = 124.5010059[MHz]
X_Offset         = 100[ppm]
X_Points         = 32768
X_Prescans       = 4
X_Resolution     = 1.1920929[Hz]
X_Sweep          = 39.0625[kHz]
X_Sweep_Clipped = 31.25[kHz]
Irr_Domain       = Proton
Irr_Freq         = 495.13191398[MHz]
Irr_Offset       = 5[ppm]
Clipped          = FALSE
Scans            = 5000
Total_Scans      = 5000

Relaxation_Delay = 2[s]
Recvr Gain       = 56
Temp_Get         = 20.5[dC]
X_90_Width       = 9.61[us]
X_Acq_Time       = 0.8388608[s]
X_Angle          = 30[deg]
X_Atn            = 10[dB]
X_Pulse          = 3.20333333[us]
Irr_Atn_Dec      = 23.948[dB]
Irr_Atn_Dec_Calc = 23.948[dB]
Irr_Atn_Dec_Default_Calc = 23.948[dB]
Irr_Atn_Noise   = 23.948[dB]
Irr_Dec_Bandwidth_Hz = 5.97826087[kHz]
Irr_Dec_Bandwidth_Ppm = 12.07407703[ppm]
Irr_Dec_Freq     = 495.13191398[MHz]
Irr_Dec_Merit_Factor = 2.2
Irr_Decoupling  = TRUE
Irr_Noise       = TRUE
Irr_Noise       = WALTZ

```



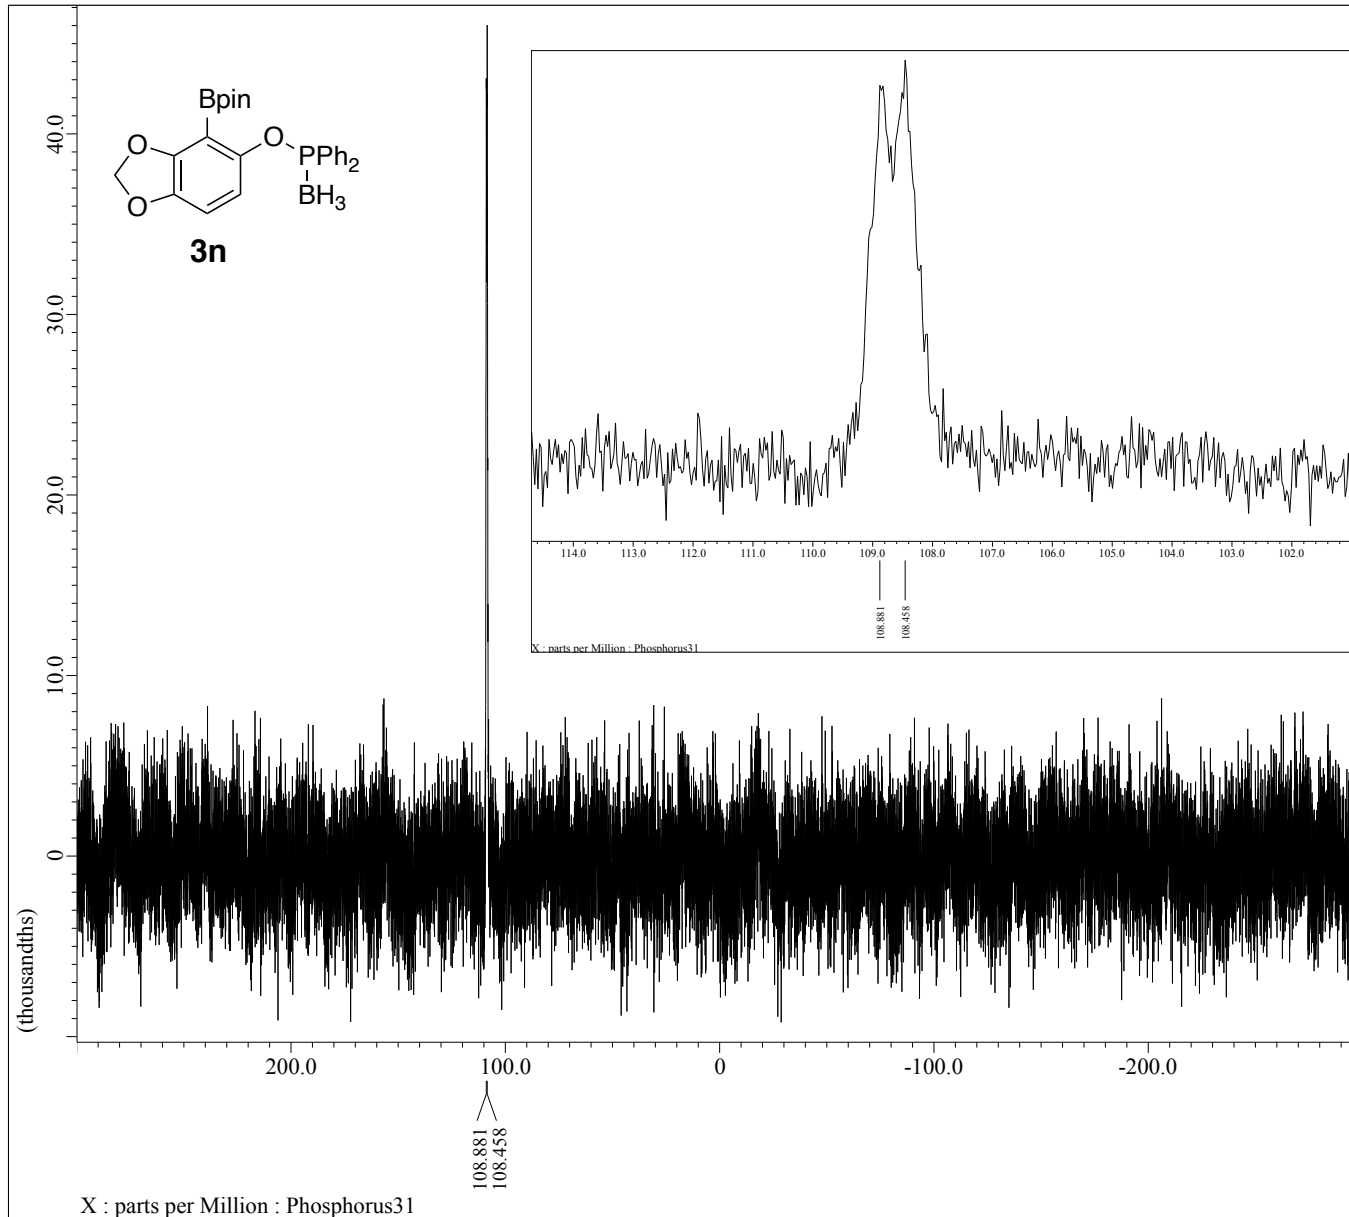

---- PROCESSING PARAMETERS ----  
 sexp( 2.0[Hz], 0.0[s] )  
 trapezoid( 0[%], 0[%], 80[%], 100[%] )  
 zerofill( 1, TRUE )  
 fft( 1, TRUE, TRUE )  
 machinephase  
 ppm  
 phase( -21.42682, 0, 50[%] )  
 base\_correct( Akima, 5, 0, FALSE, 3, None, FA  
 Derived from: YH-295-f2\_31P\_1Hdec-1-1.jdf

Filename = YH-295-f2\_31P\_1Hdec  
 Author = delta  
 Experiment = single\_pulse\_dec.j  
 Sample\_Id = YH-295-f2  
 Solvent = CHLOROFORM-D  
 Actual\_Start\_Time = 3-APR-2020 12:54:  
 Revision\_Time = 7-APR-2020 21:38:

Comment = single pulse decou  
 Data Format = 1D REAL  
 Dim Size = 26214  
 X Domain = Phosphorus31  
 Dim Title = Phosphorus31  
 Dim Units = [ppm]  
 Dimensions = X  
 Spectrometer = JNM-ECZ500R/S1

Field Strength = 11.62926421[T] (50  
 X Acq Duration = 0.18874368[s]  
 X Domain = 31P  
 X Freq = 200.43293989[MHz]  
 X Offset = 0[ppm]  
 X Points = 32768  
 X Prescans = 4  
 X Resolution = 5.29819065[Hz]  
 X Sweep = 173.61111111[kHz]  
 X Sweep Clipped = 138.88888889[kHz]  
 Irr Domain = Proton  
 Irr Freq = 495.13191398[MHz]  
 Irr Offset = 5[ppm]  
 Clipped = FALSE  
 Scans = 64  
 Total\_Scans = 64

Relaxation\_Delay = 1[s]  
 Recvr Gain = 66  
 Temp\_Get = 20.7[dC]  
 X 90\_Width = 19.78[us]  
 X Acq Time = 0.18874368[s]  
 X Angle = 30[deg]  
 X Atn = 9.4[dB]  
 X Pulse = 6.59333333[us]  
 Irr Atn Dec = 23.948[dB]  
 Irr Atn Dec Calc = 23.948[dB]  
 Irr Atn Dec Default\_Calc = 23.948[dB]  
 Irr Atn Noe = 23.948[dB]  
 Irr Dec Bandwidth\_Hz = 5.97826087[kHz]  
 Irr Dec Bandwidth\_Ppm = 12.07407703[ppm]  
 Irr Dec Freq = 495.13191398[MHz]  
 Irr Dec Merit Factor = 2.2  
 Irr Decoupling = TRUE  
 Irr Noe = TRUE  
 Irr Noise = WALTZ

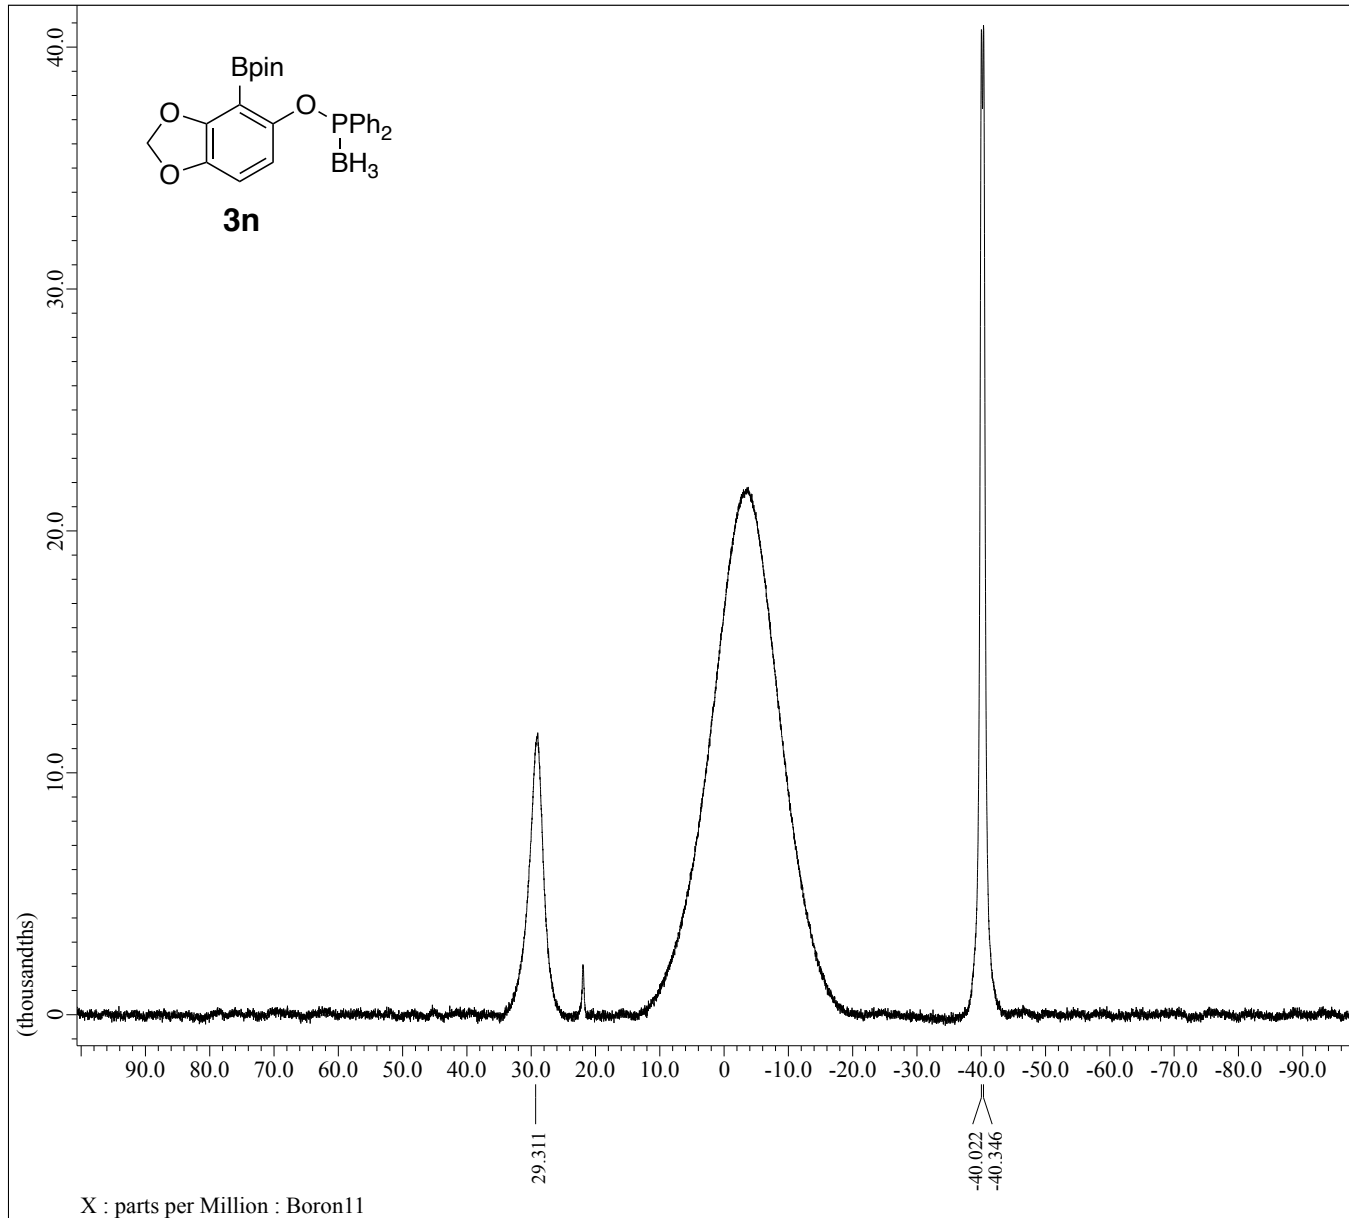

```

---- PROCESSING PARAMETERS ----
sexp( 2.0[Hz], 0.0[s] )
trapezoid( 0[%], 0[%], 80[%], 100[%] )
zerofill( 1, TRUE )
fft( 1, TRUE, TRUE )
machinephase
ppm
phase( 15, 0, 38.85477[%] )
base_correct( Akima, 5, 0, FALSE, 3, None, FA
Derived from: YH-295-f2_11B_1Hdec-1-1.jdf

```

```

Filename      = YH-295-f2_11B_1Hde
Author        = delta
Experiment    = single_pulse_decou
Sample_Id     = YH-295-f2
Solvent       = CHLOROFORM-D
Actual_Start_Time = 3-APR-2020 13:34:
Revision_Time  = 7-APR-2020 12:59:

Comment       = single_pulse decou
Data_Format   = 1D REAL
Dim_Size      = 26214
X_Domain      = Boron11
Dim_Title     = Boron11
Dim_Units     = [ppm]
Dimensions    = X
Spectrometer  = JNM-ECZ500R/S1

Field Strength = 11.62926421[T] (50
X_Acq_Duration = 0.66060288[s]
X_Domain       = 11B
X_Freq         = 158.85814241[MHz]
X_Offset       = 0[ppm]
X_Points       = 32768
X_Prescans     = 4
X_Resolution   = 1.51376876[Hz]
X_Sweep        = 49.6031746[kHz]
X_Sweep_Clipped = 39.68253968[kHz]
Irr_Domain     = Proton
Irr_Freq       = 495.13191398[MHz]
Irr_Offset     = 5[ppm]
Clipped        = FALSE
Scans          = 500
Total_Scans    = 500

Relaxation_Delay = 2[s]
Recvr Gain       = 56
Temp_Get         = 21[dC]
X_90_Width      = 36.17[us]
X_Acq_Time       = 0.66060288[s]
X_Angle         = 30[deg]
X_Atn           = 12[dB]
X_Pulse         = 12.05666667[us]
Irr_Atn_Dec     = 23.948[dB]
Irr_Atn_Dec_Calc = 23.948[dB]
Irr_Atn_Dec_Default_Calc = 23.948[dB]
Irr_Atn_Noise  = 23.948[dB]
Irr_Dec_Bandwidth_Hz = 5.97826087[kHz]
Irr_Dec_Bandwidth_Ppm = 12.07407703[ppm]
Irr_Dec_Freq    = 495.13191398[MHz]
Irr_Dec_Merit_Factor = 2.2
Irr_Decoupling = TRUE
Irr_Noise      = TRUE
Irr_Noise      = WALTZ

```

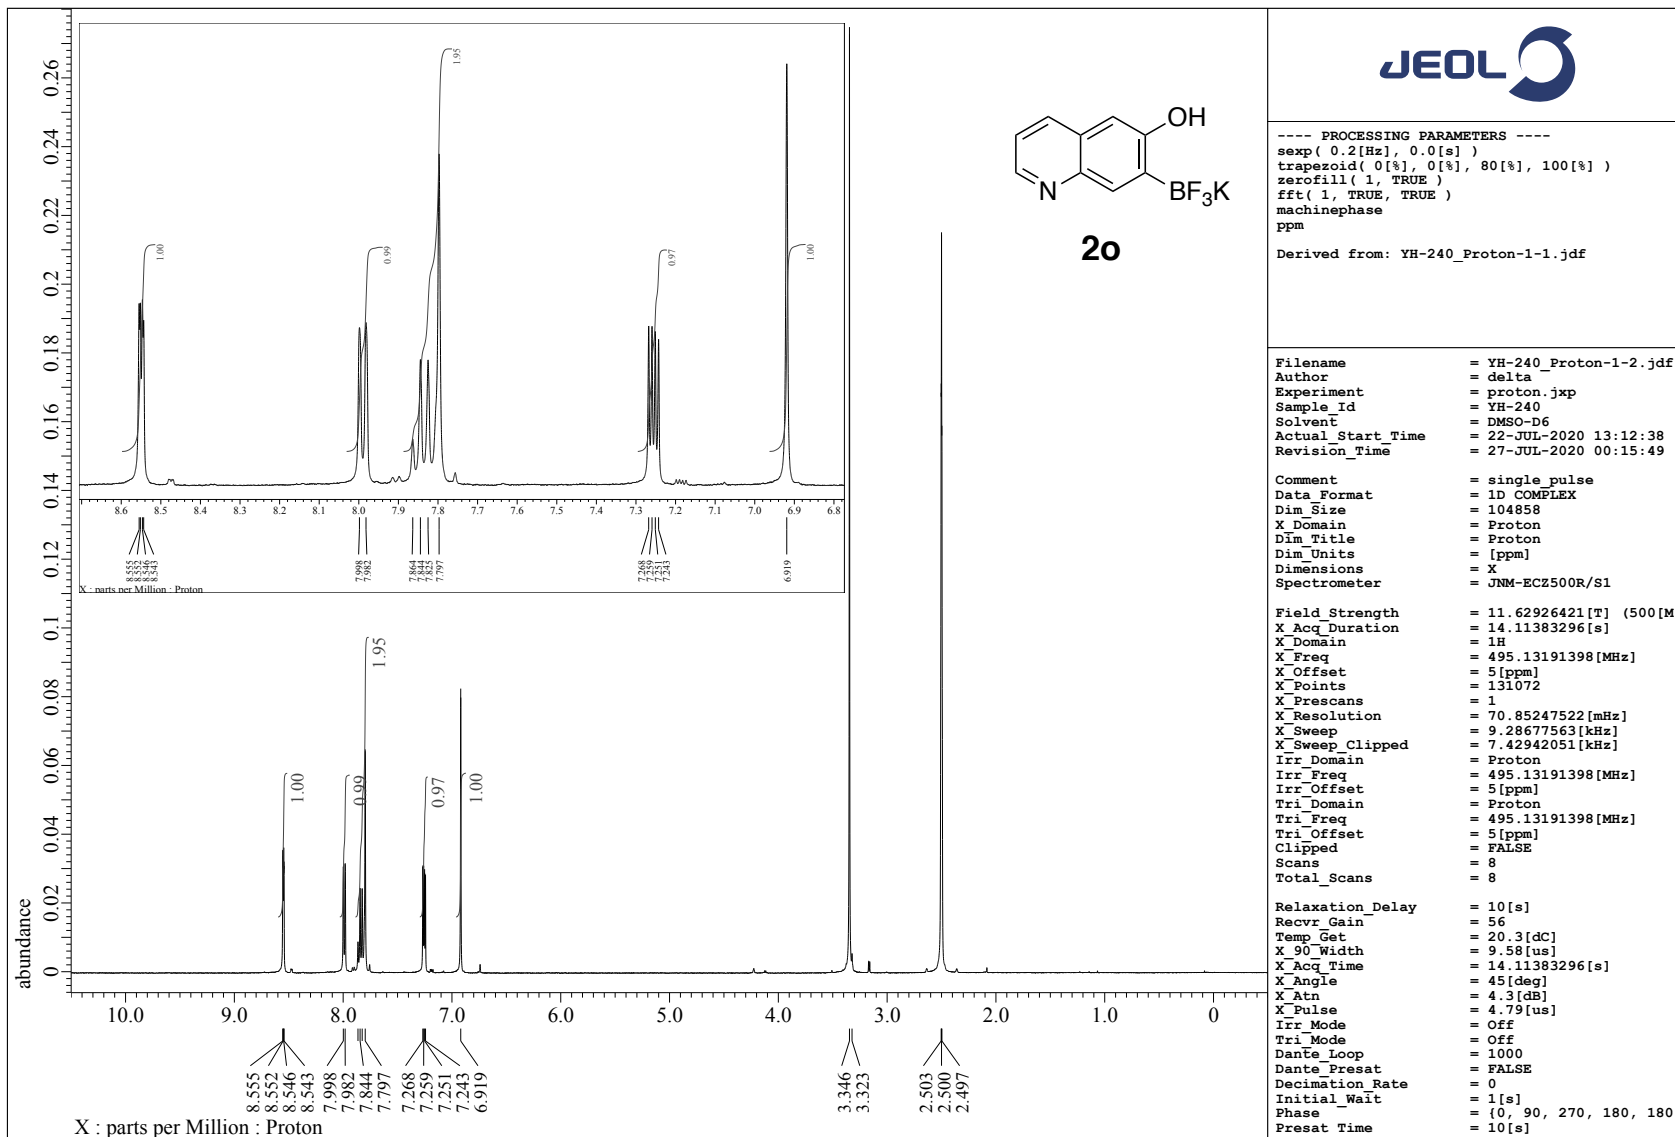

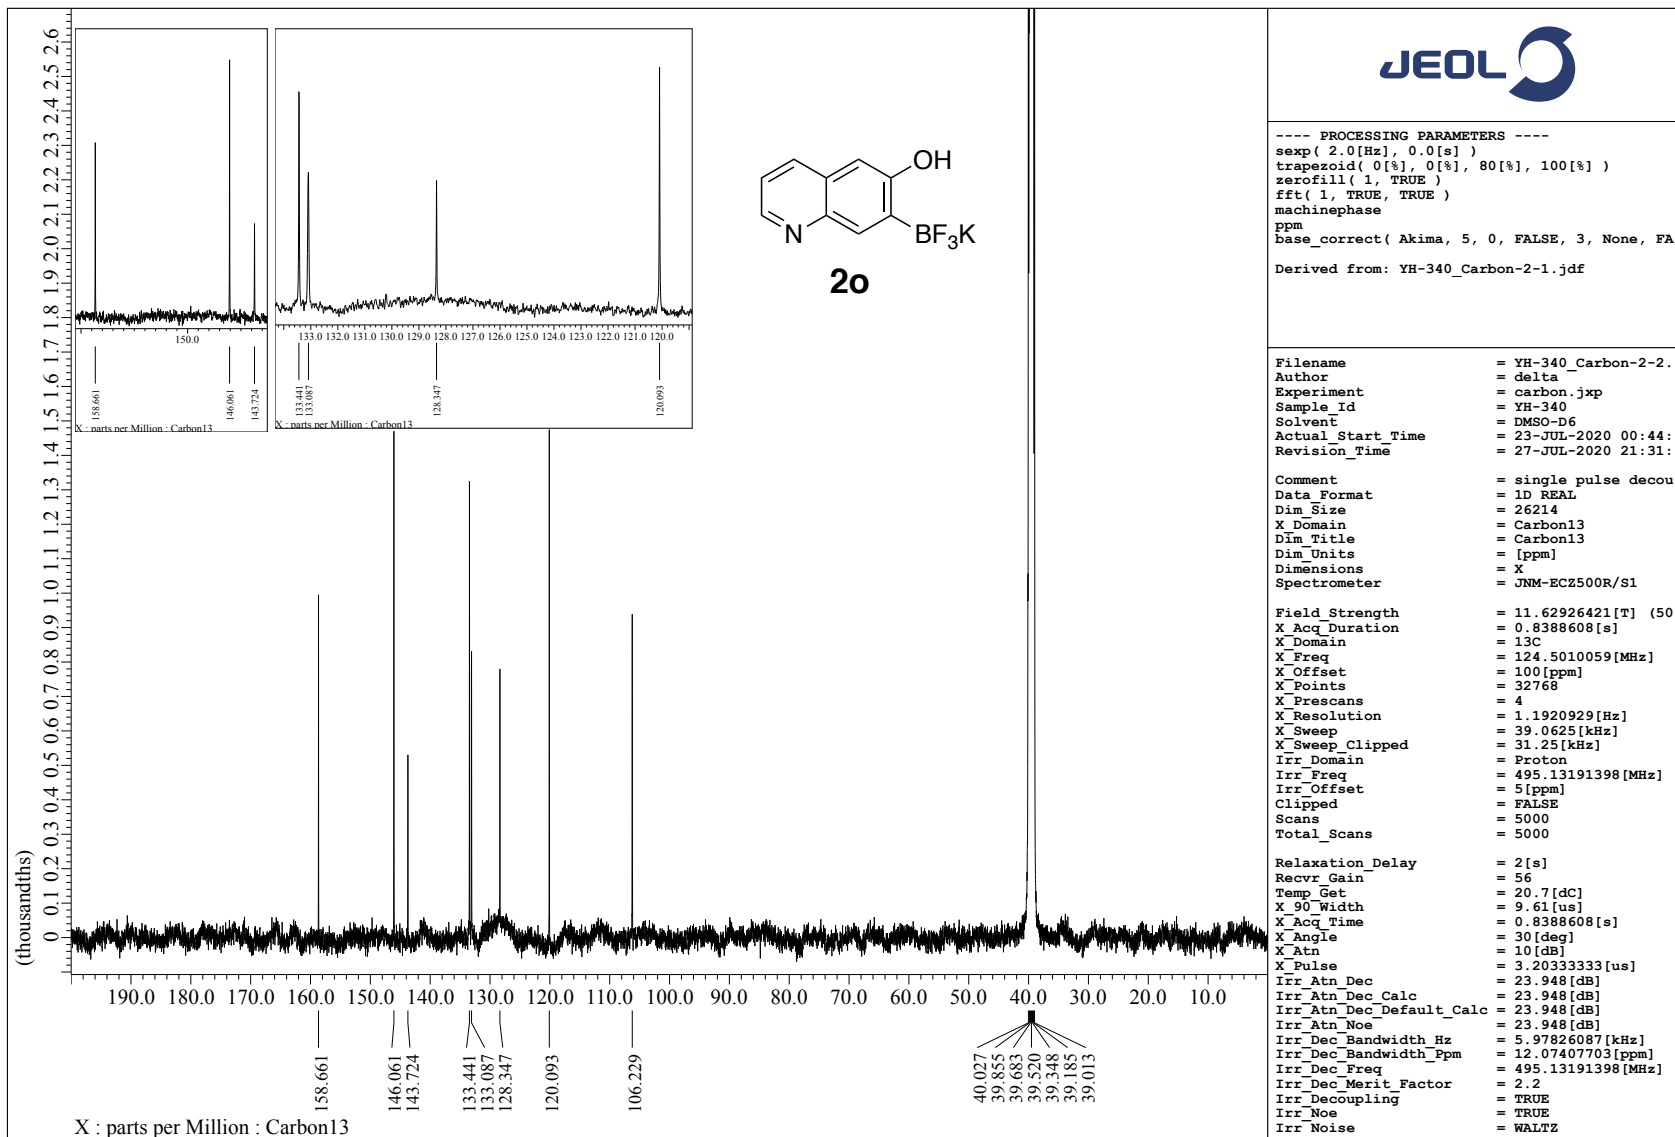

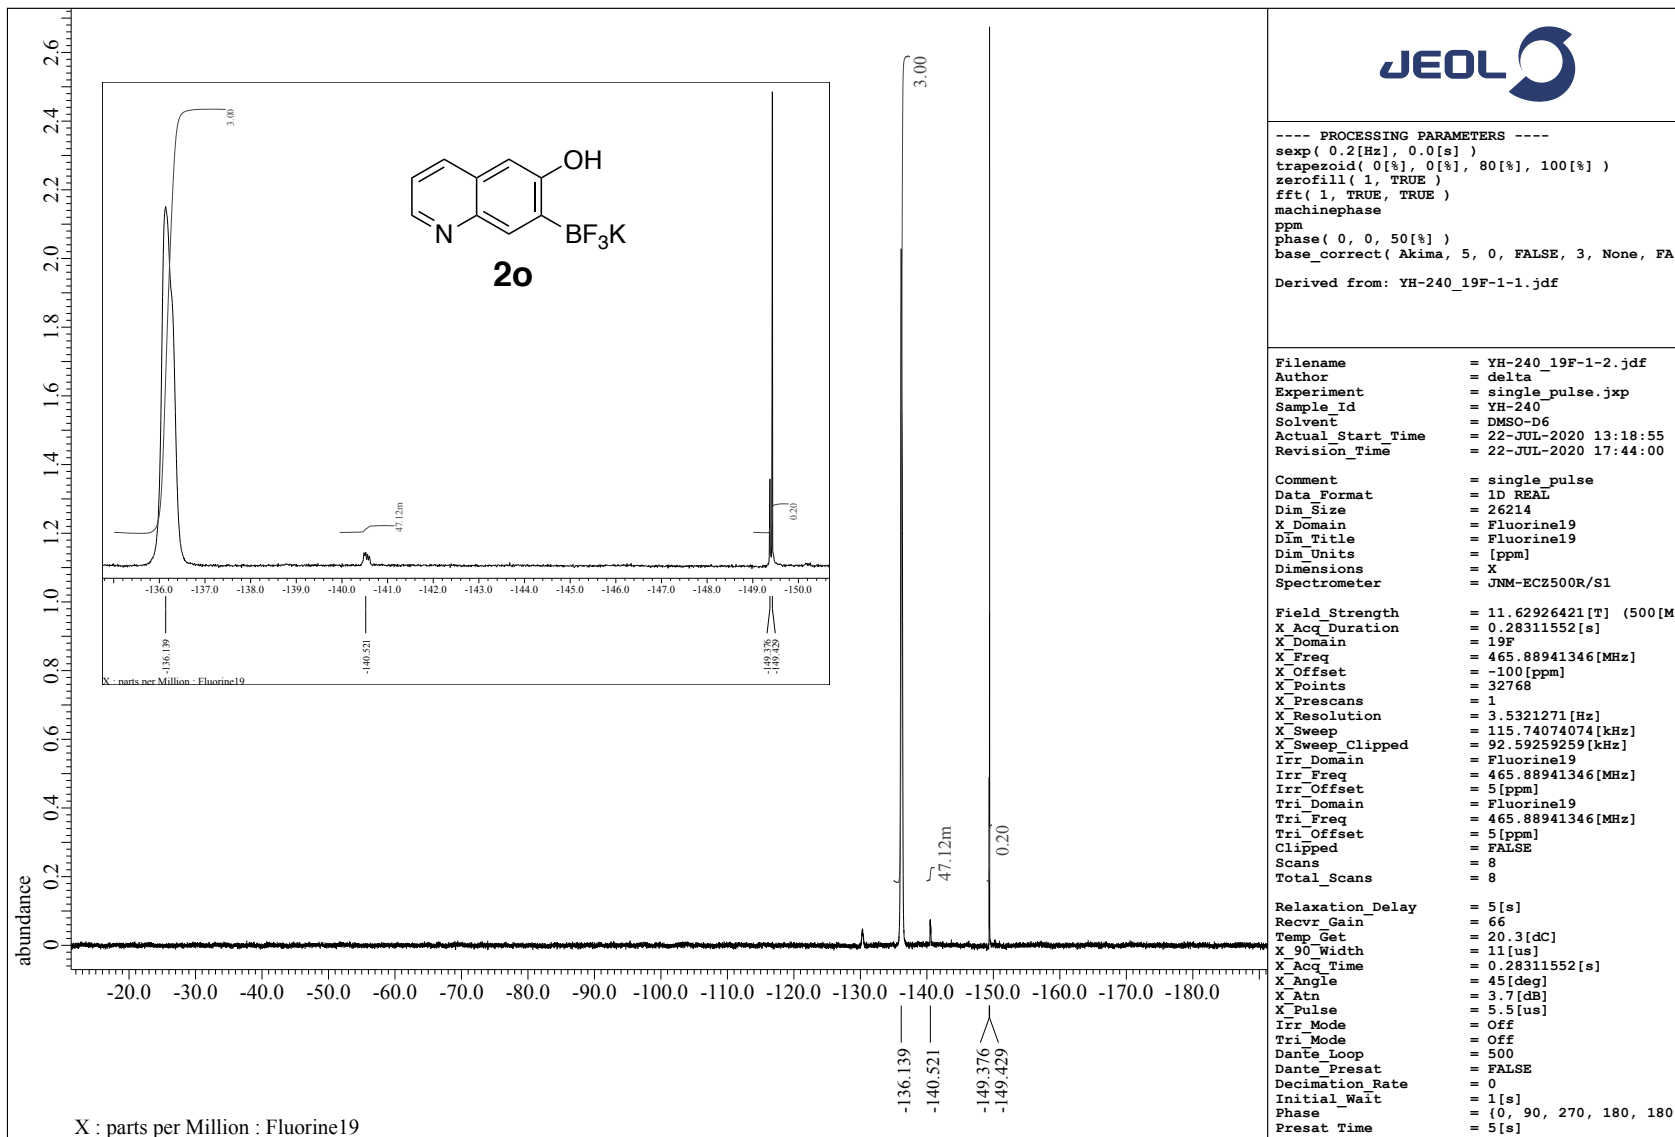

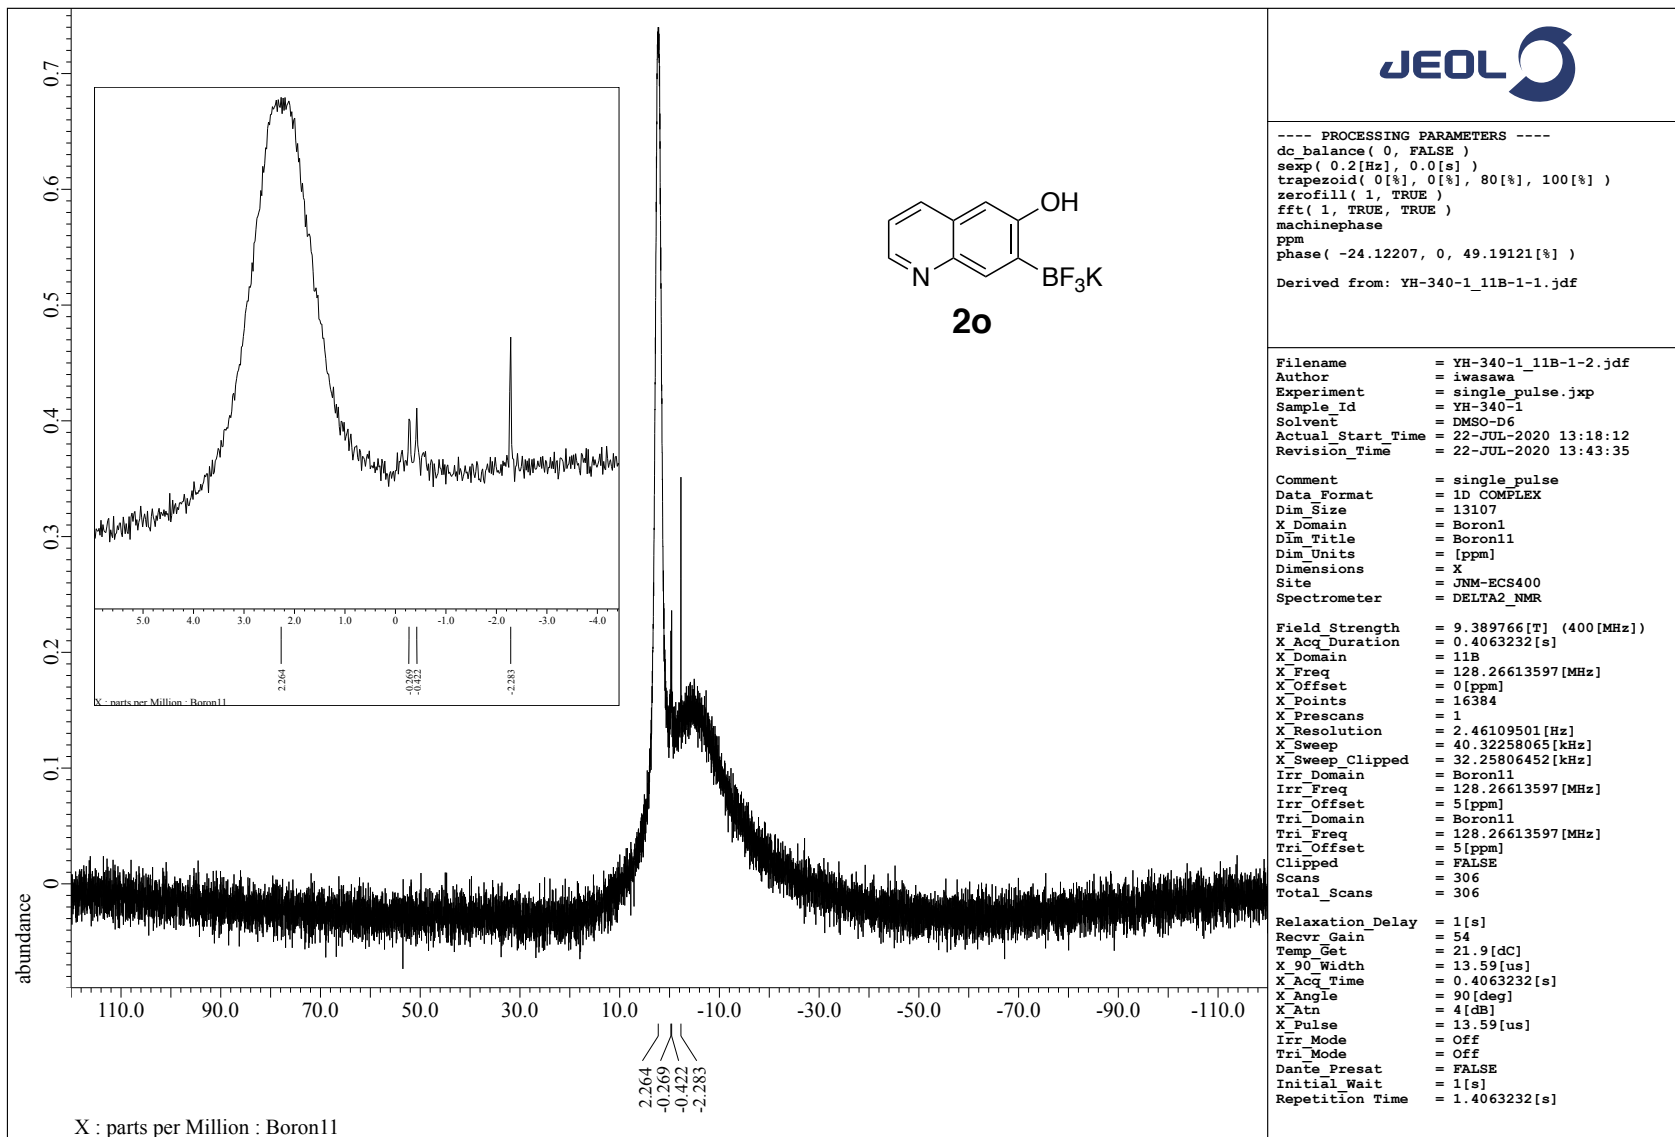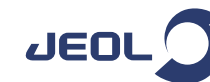

---- PROCESSING PARAMETERS ----  
 dc balance( 0, FALSE )  
 sexp( 0.2[Hz], 0.0[s] )  
 trapezoid( 0[%], 0[%], 80[%], 100[%] )  
 zerofill( 1, TRUE )  
 fft( 1, TRUE, TRUE )  
 machinephase  
 ppm  
 phase( -24.12207, 0, 49.19121[%] )  
 Derived from: YH-340-1\_11B-1-1.jdf

Filename = YH-340-1\_11B-1-2.jdf  
 Author = iwasawa  
 Experiment = single\_pulse.jxp  
 Sample Id = YH-340-1  
 Solvent = DMSO-D6  
 Actual Start Time = 22-JUL-2020 13:18:12  
 Revision\_Time = 22-JUL-2020 13:43:35

Comment = single\_pulse  
 Data Format = 1D COMPLEX  
 Dim Size = 13107  
 X\_Domain = Boron1  
 Dim Title = Boron11  
 Dim Units = [ppm]  
 Dimensions = X  
 Site = JNM-ECS400  
 Spectrometer = DELTA2\_NMR

Field Strength = 9.389766[T] (400[MHz])  
 X\_Acq\_Duration = 0.4063232[s]  
 X\_Domain = 11B  
 X\_Freq = 128.26613597[MHz]  
 X\_Offset = 0[ppm]  
 X\_Points = 16384  
 X\_Prescans = 1  
 X\_Resolution = 2.46109501[Hz]  
 X\_Sweep = 40.32258065[kHz]  
 X\_Sweep\_Clippped = 32.25806452[kHz]  
 Irr\_Domain = Boron11  
 Irr\_Freq = 128.26613597[MHz]  
 Irr\_Offset = 5[ppm]  
 Tri\_Domain = Boron11  
 Tri\_Freq = 128.26613597[MHz]  
 Tri\_Offset = 5[ppm]  
 Clipped = FALSE  
 Scans = 306  
 Total\_Scans = 306

Relaxation\_Delay = 1[s]  
 Recvr\_Gain = 54  
 Temp\_Get = 21.9[dC]  
 X\_90\_Width = 13.59[us]  
 X\_Acq\_Time = 0.4063232[s]  
 X\_Angle = 90[deg]  
 X\_Atn = 4[dB]  
 X\_Pulse = 13.59[us]  
 Irr\_Mode = Off  
 Tri\_Mode = Off  
 Dante\_Presat = FALSE  
 Initial\_Wait = 1[s]  
 Repetition\_Time = 1.4063232[s]

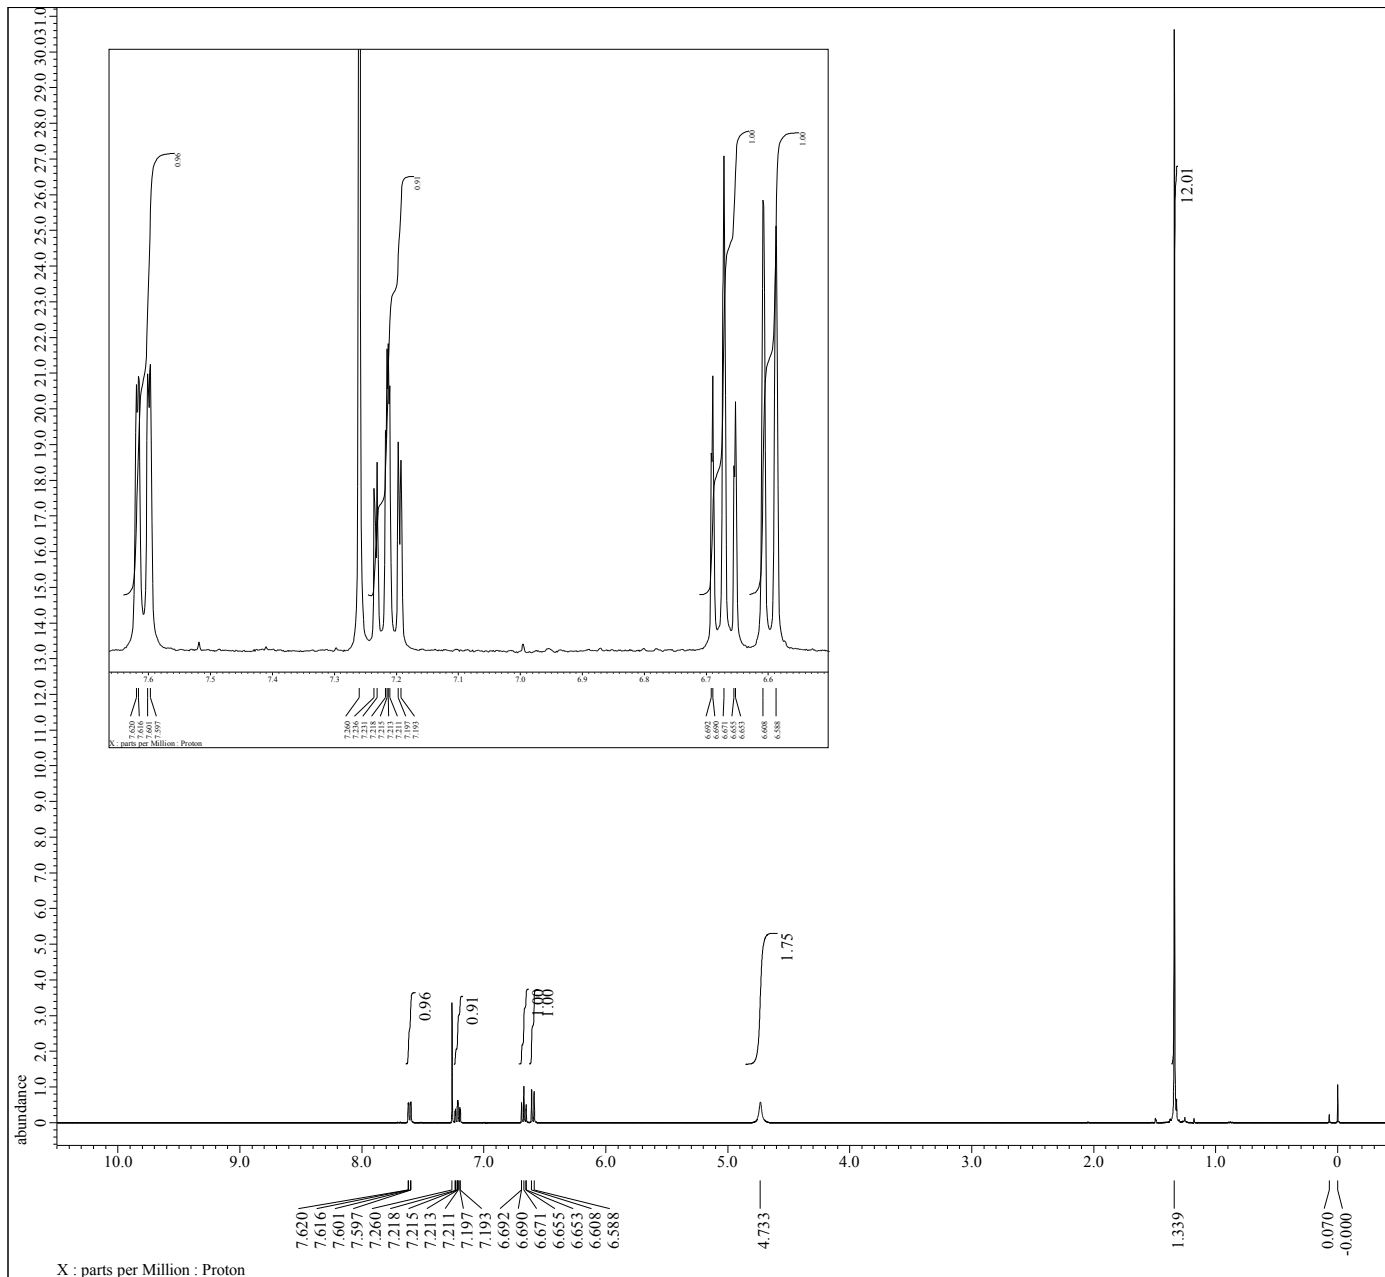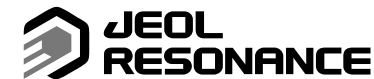

```

Filename      = YH-196(aniline)_Proton-1-6
Author       = iwawata
Experiment   = proton.jpg
Sample_Id    = YH-196(aniline)
Solvent      = CHLOROFORM-D
Creation_Time = 24-MAR-2020 20:17:58
Revision_Time = 8-APR-2020 12:09:55
Current_Time = 8-APR-2020 12:11:16

Comment      = single_pulse
Data_Format  = 1D_REAL
Dim_Size     = 13107
Dim_Title    = Proton
Dim_Units    = [ppm]
Dimensions   = X
Site         = JNM-ECS400
Spectrometer = DELTA2_NMR

Field_Strength = 9.389766[T] (400 [MHz])
X_Acq_Duration = 2.18365952[s]
X_Domain       = 1h
X_Freq         = 399.78219838 [MHz]
X_Offset       = 5 [ppm]
X_Points       = 16384
X_Prescans     = 1
X_Resolution   = 0.45794685 [Hz]
X_Sweep        = 7.5030012 [kHz]
X_Sweep_Clipped = 6.00240096 [kHz]
Irr_Domain     = Proton
Irr_Freq       = 399.78219838 [MHz]
Irr_Offset     = 5 [ppm]
Tri_Domain     = Proton
Tri_Freq       = 399.78219838 [MHz]
Tri_Offset     = 5 [ppm]
Clipped        = FALSE
Scans          = 8
Total_Scans    = 8

Relaxation_Delay = 3 [s]
Recvr_Gain       = 44
Temp_Get         = 19.9 [dc]
X_90_Width      = 6.1 [us]
X_Acq_Time      = 2.18365952 [s]
X_Angle         = 45 [deg]
X_Attn          = 1 [dB]
X_Pulse         = 3.05 [us]
Irr_Mode        = Off
Tri_Mode        = Off
Date_Preset     = FALSE
Initial_Wait    = 1 [s]
Repetition_Time = 5.18365952 [s]
  
```

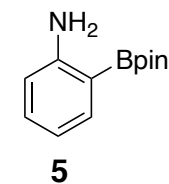

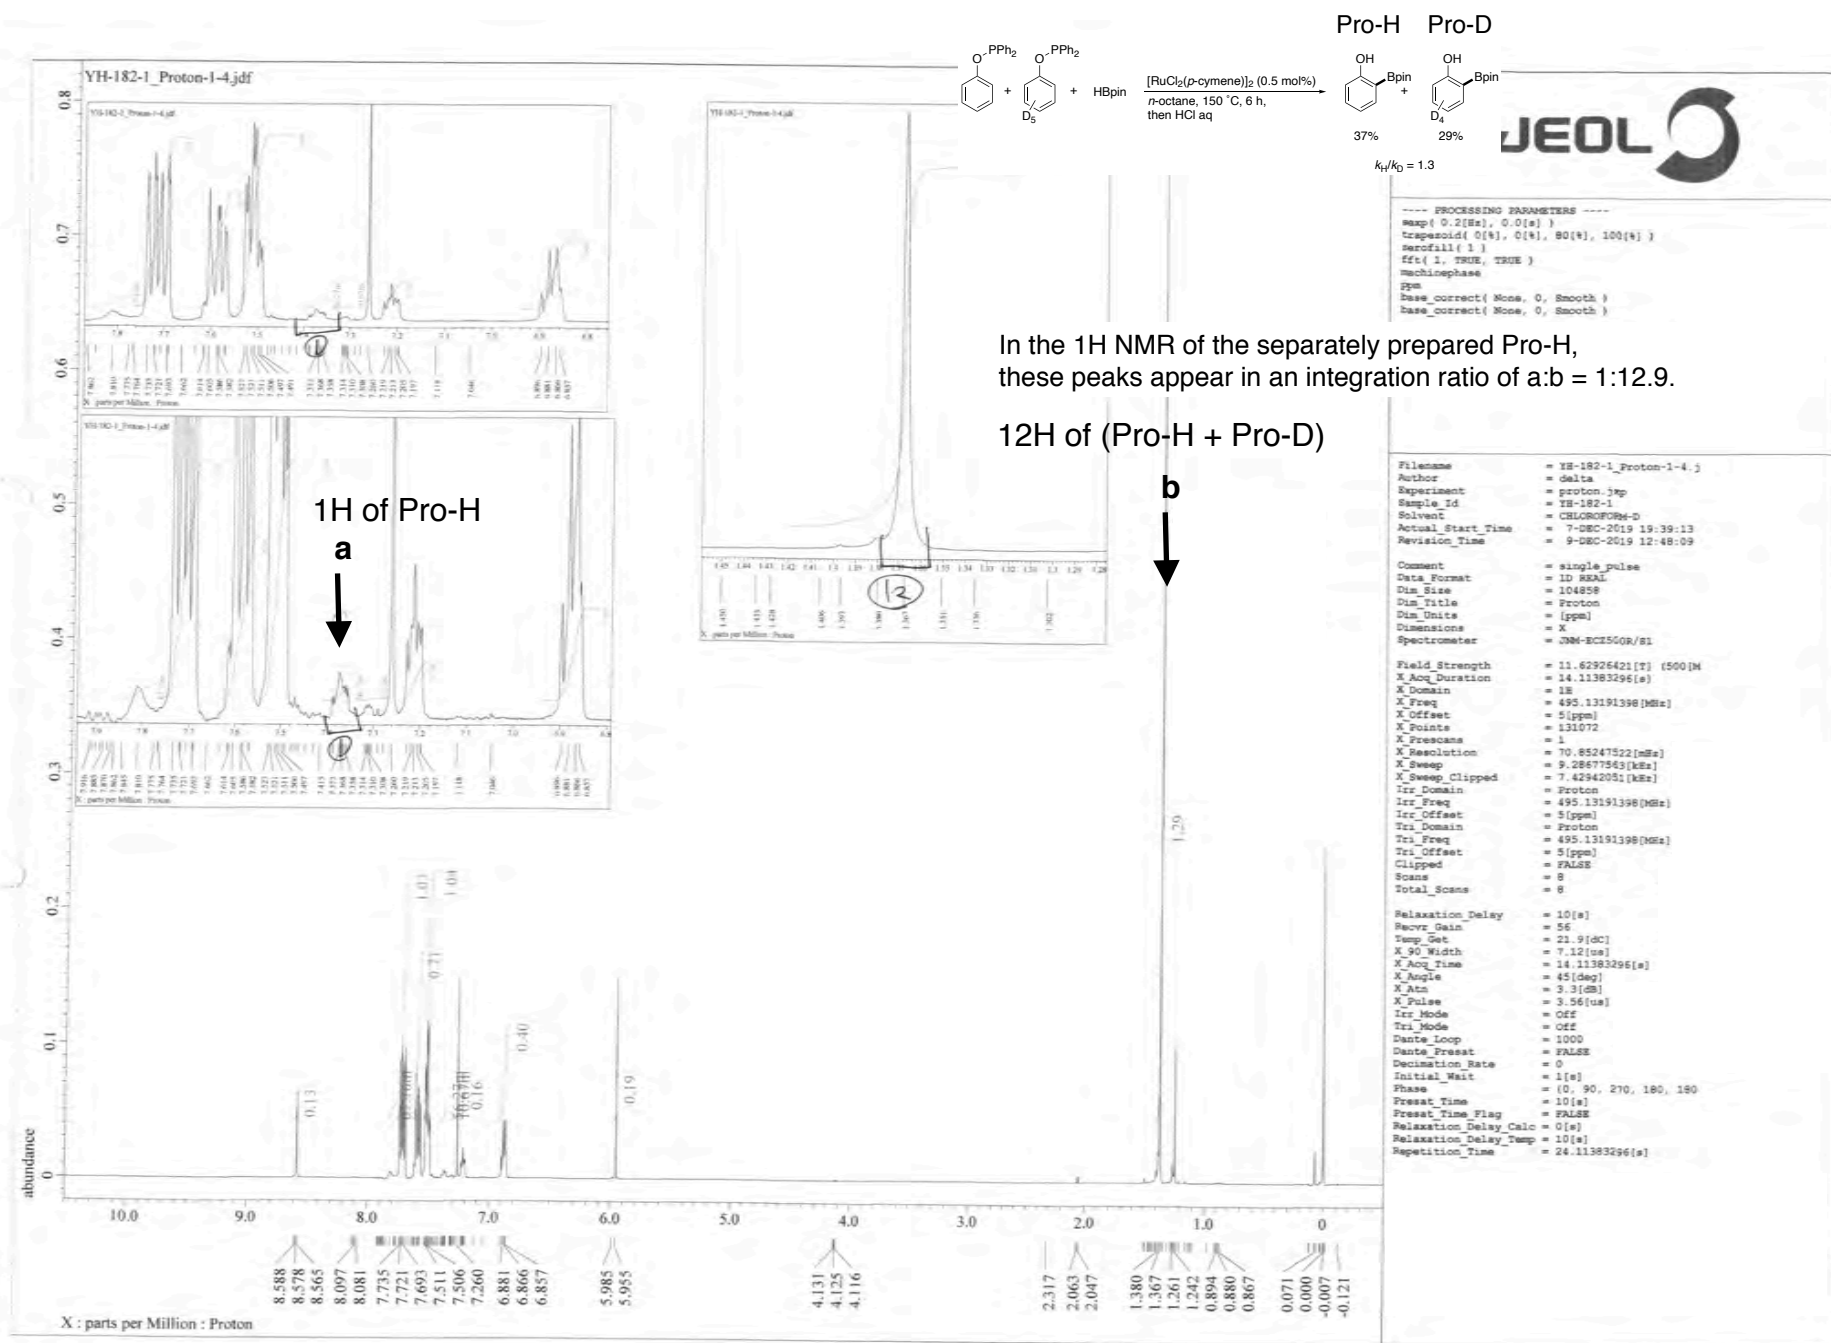



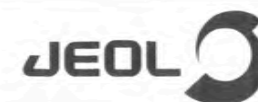

Filename = YH-317\_Proton-1-6.jdf  
Author = delta  
Experiment = proton\_jmp  
Sample\_Id = YH-317  
Solvent = CHLOROFORM-D  
Actual\_Start\_Time = 7-APR-2020 21:51:23  
Revision\_Time = 7-APR-2020 21:41:06  
Comment = single\_pulse  
Data\_Format = 1D\_REAL  
Dim\_Size = 104858  
Dim\_Title = Proton  
Dim\_Units = [ppm]  
Dimensions = X  
Spectrometer = JNM-ECZ500R/si  
Field\_Strength = 11.62926421[T] (500[M]  
X\_Acq\_Duration = 14.11383296[s]  
X\_Domain = 18  
X\_Freq = 495.13191398[MHz]  
X\_Offset = 5[ppm]  
X\_Points = 131072  
X\_Prescans = 1  
X\_Resolution = 70.85247522[mHz]  
X\_Sweep = 9.28677563[kHz]  
X\_Sweep\_Clipped = 7.42942051[kHz]  
Irr\_Domain = Proton  
Irr\_Freq = 495.13191398[MHz]  
Irr\_Offset = 5[ppm]  
Tri\_Domain = Proton  
Tri\_Freq = 495.13191398[MHz]  
Tri\_Offset = 5[ppm]  
Clipped = FALSE  
Scans = 8  
Total\_Scans = 8  
Relaxation\_Delay = 10[s]  
Recvr\_Gain = 36  
Temp\_Get = 20.9[degC]  
X\_90\_Width = 9.58[us]  
X\_Acq\_Time = 14.11383296[s]  
X\_Angle = 45[deg]  
X\_Atn = 4.3[dB]  
X\_Pulse = 4.79[us]  
Irr\_Mode = Off  
Tri\_Mode = Off  
Dante\_Loop = 1000  
Dante\_Preset = FALSE  
Decimation\_Rate = 0  
Initial\_Wait = 1[s]  
Phase = 10, 90, 270, 180, 180  
Preset\_Time = 10[s]  
Preset\_Time\_Flag = FALSE  
Relaxation\_Delay\_Calc = 0[s]

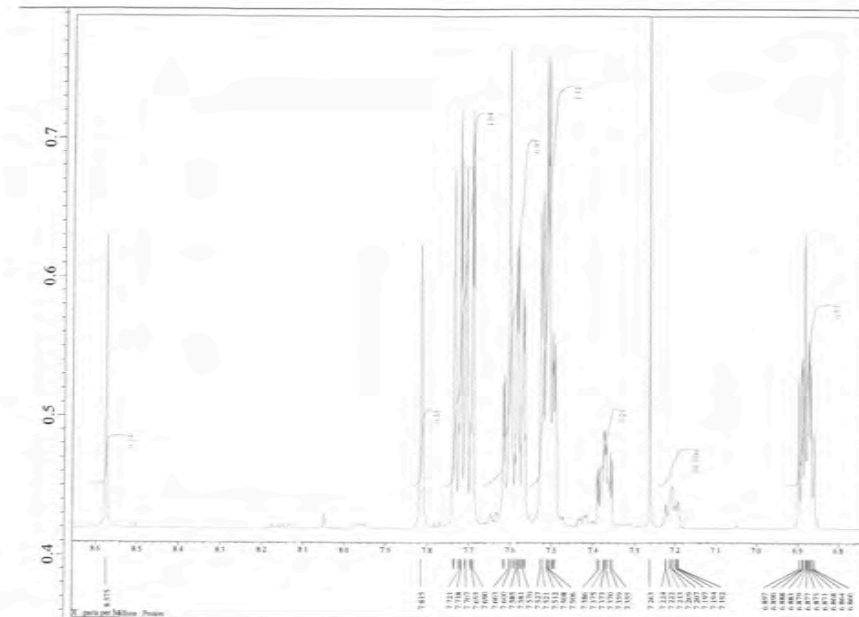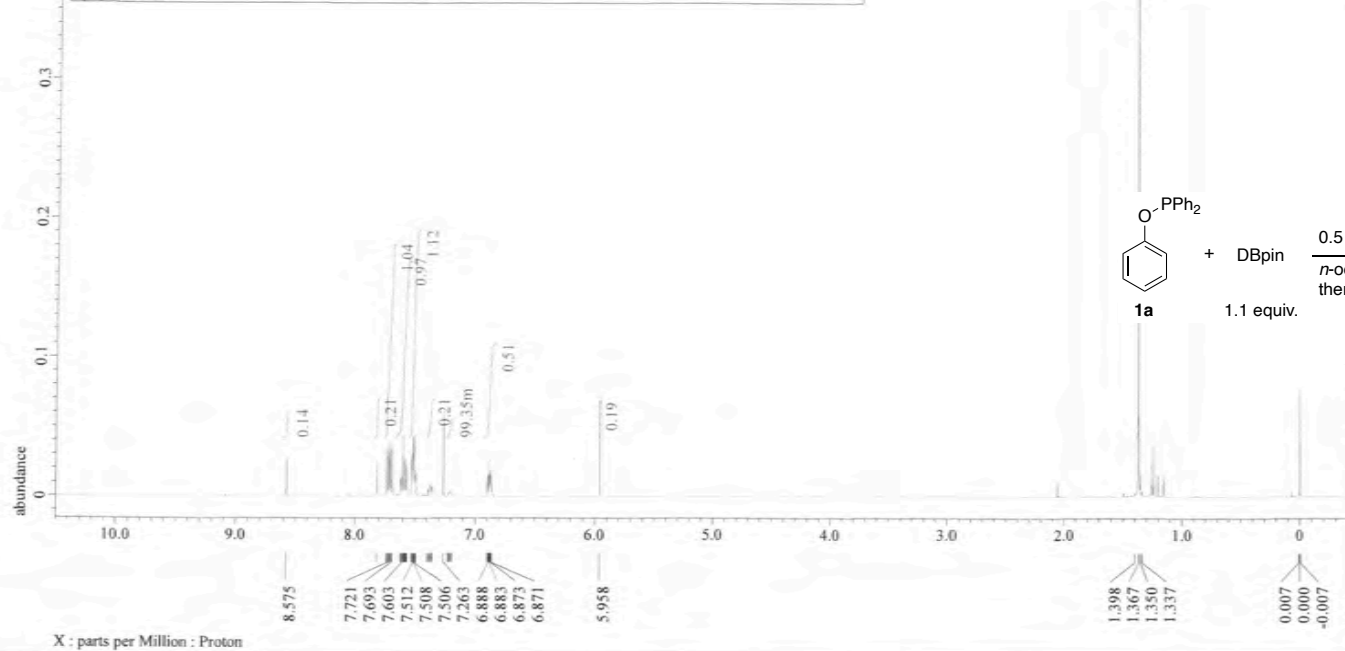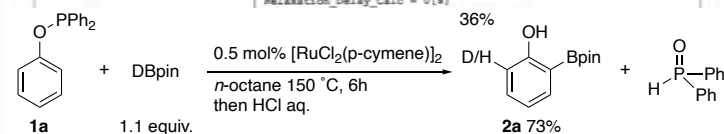

Supplement: d0cc02889d1.pdf [file d0cc02889d1.pdf]
